# Supplementary material for: Designed pincer ligand supported Co(ii)-based catalysts for dehydrogenative activation of alcohols: Studies on N-alkylation of amines, α-alkylation of ketones and synthesis of quinolines
Source: Royal Society of Chemistry journal article supplement (doi:10.1039/d0dt03748f), 2021-01-01
Supplement: d0dt03748f1.pdf [file d0dt03748f1.pdf]

## Supporting Information

### Designed pincer ligands supported Co(II)-based catalysts for dehydrogenative activation of alcohols: Studies on *N*-alkylation of amines, $\alpha$ -alkylation of ketones and synthesis of quinolines

Anshu Singh<sup>a</sup>, Ankur Maji<sup>a</sup>, Mayank Joshi<sup>b</sup>, Angshuman R. Choudhury<sup>b</sup>, and Kaushik Ghosh<sup>\*a</sup>

<sup>a</sup>Department of Chemistry, Indian Institute of Technology Roorkee, Roorkee-247667 Uttarakhand, India

<sup>b</sup>Department of Chemical Sciences, Indian Institute of Science Education and Research Mohali

E-mail. kaushik.ghosh@cy.iitr.ac.in, ghoshfcy@iitr.ac.in

#### Table of Contents

| Figures        | Table of Contents                                                                                                                                                                                                                                                                                                          | Page No. |
|----------------|----------------------------------------------------------------------------------------------------------------------------------------------------------------------------------------------------------------------------------------------------------------------------------------------------------------------------|----------|
| Figure S1      | <sup>1</sup> H NMR spectrum of L <sup>1</sup> taking CDCl <sub>3</sub> as solvent.                                                                                                                                                                                                                                         | 3        |
| Figure S2      | <sup>13</sup> C NMR spectrum of L <sup>1</sup> taking CDCl <sub>3</sub> as solvent.                                                                                                                                                                                                                                        | 3        |
| Figure S3      | <sup>1</sup> H NMR spectrum of L <sup>2</sup> taking CDCl <sub>3</sub> as solvent.                                                                                                                                                                                                                                         | 4        |
| Figure S4      | <sup>13</sup> C NMR spectrum of L <sup>2</sup> taking CDCl <sub>3</sub> as solvent.                                                                                                                                                                                                                                        | 4        |
| Figure S5      | <sup>1</sup> H NMR spectrum of L <sup>3</sup> taking CDCl <sub>3</sub> as solvent.                                                                                                                                                                                                                                         | 5        |
| Figure S6      | <sup>13</sup> C NMR spectrum of L <sup>3</sup> taking CDCl <sub>3</sub> as solvent.                                                                                                                                                                                                                                        | 5        |
| Figure S7      | Electronic absorption spectra of ligands L <sup>1</sup> -L <sup>3</sup> in dichloromethane solution.                                                                                                                                                                                                                       | 6        |
| Table S1       | Spectral data of ligands L <sup>1</sup> -L <sup>3</sup> in dichloromethane solution.                                                                                                                                                                                                                                       | 6        |
| Figure S8      | Electronic absorption spectra of complexes <b>Co1-Co3</b> in dichloromethane solution.                                                                                                                                                                                                                                     | 6        |
| Table S2       | Spectral data of complexes <b>Co1-Co3</b> in dichloromethane solution.                                                                                                                                                                                                                                                     | 6        |
| Figure S9      | ESI-MS Spectrum of L <sup>1</sup> using acetonitrile as solvent.                                                                                                                                                                                                                                                           | 7        |
| Figure S10     | ESI-MS Spectrum of L <sup>2</sup> using acetonitrile as solvent.                                                                                                                                                                                                                                                           | 7        |
| Figure S11     | ESI-MS Spectrum of L <sup>3</sup> using acetonitrile as solvent.                                                                                                                                                                                                                                                           | 8        |
| Figure S12     | ESI-MS spectra of complex <b>Co1</b> using acetonitrile as solvent.                                                                                                                                                                                                                                                        | 8        |
| Figure S13     | ESI-MS spectra of complex <b>Co2</b> using acetonitrile as solvent.                                                                                                                                                                                                                                                        | 9        |
| Figure S14     | ESI-MS spectra of complex <b>Co3</b> using acetonitrile as solvent.                                                                                                                                                                                                                                                        | 9        |
| Figure S15     | FT-IR spectrum of free ligand L <sup>1</sup> .                                                                                                                                                                                                                                                                             | 10       |
| Figure S16     | FT-IR spectrum of free ligand L <sup>2</sup> .                                                                                                                                                                                                                                                                             | 10       |
| Figure S17     | FT-IR spectrum of free ligand L <sup>3</sup> .                                                                                                                                                                                                                                                                             | 10       |
| Figure S18     | FT-IR spectrum of complex <b>Co1</b> .                                                                                                                                                                                                                                                                                     | 11       |
| Figure S19     | FT-IR spectrum of complex <b>Co2</b> .                                                                                                                                                                                                                                                                                     | 11       |
| Figure S20     | FT-IR spectrum of complex <b>Co3</b> .                                                                                                                                                                                                                                                                                     | 11       |
| Figure S21     | <sup>1</sup> H NMR spectrum of complex <b>Co1</b> taking CDCl <sub>3</sub> as solvent.                                                                                                                                                                                                                                     | 12       |
| Figure S22     | <sup>1</sup> H NMR spectrum of complex <b>Co2</b> taking CDCl <sub>3</sub> as solvent.                                                                                                                                                                                                                                     | 12       |
| Figure S23     | <sup>1</sup> H NMR spectrum of complex <b>Co3</b> taking CDCl <sub>3</sub> as solvent.                                                                                                                                                                                                                                     | 13       |
| Table S3       | Crystal data and structural refinement parameters for complexes <b>Co1</b> and <b>Co3</b> .                                                                                                                                                                                                                                | 14       |
| Table S4       | Selected bond angles and bond distances of complex <b>Co1</b> .                                                                                                                                                                                                                                                            | 14       |
| Table S5       | Selected bond angles and bond distances of complex <b>Co3</b> .                                                                                                                                                                                                                                                            | 14       |
| Figure S24     | The reaction profile of cobalt <b>Co1</b> catalyzed <i>N</i> -alkylation of anilines with benzyl alcohols (a) Effect of bases (b) Effect of temperature (c) Effect of time (d) Loading of base KO <sup>t</sup> Bu (e) Loading of catalysts (f) Effect of catalysts. All the optimization reactions are done in three times | 15       |
| Figure S25-S48 | <sup>1</sup> H NMR and <sup>13</sup> C NMR spectrum of 3aa-3fa taking CDCl <sub>3</sub> as solvent.                                                                                                                                                                                                                        | 16-27    |
| Figure S49     | The reaction profile of cobalt <b>Co1</b> catalyzed $\alpha$ -alkylation of ketones with benzyl alcohols (a) Effect of bases (b) Effect of temperature (c) Effect of time (d) Loading of base KO <sup>t</sup> Bu                                                                                                           | 28       |

|                          |                                                                                                                                                                                                                                                                                                              |       |
|--------------------------|--------------------------------------------------------------------------------------------------------------------------------------------------------------------------------------------------------------------------------------------------------------------------------------------------------------|-------|
|                          | (e) Loading of catalysts (f) Effect of catalysts. All the optimization reactions are done in three times                                                                                                                                                                                                     |       |
| <b>Figure S50-S137</b>   | <sup>1</sup> H NMR and <sup>13</sup> C NMR spectrum of 5aa-5gf taking CDCl <sub>3</sub> as solvent.                                                                                                                                                                                                          | 29-72 |
| <b>Figure S138</b>       | The reaction profile of cobalt <b>Co1</b> catalyzed dehydrogenative synthesis of quinolines (a) Effect of bases (b) Effect of temperature (c) Effect of time (d) Loading of base KO <sup>t</sup> Bu (e) Loading of catalysts (f) Effect of catalysts. All the optimization reactions are done in three times | 73    |
| <b>Figure S139-S162</b>  | <sup>1</sup> H NMR and <sup>13</sup> C NMR spectrum of 7aa-7al taking CDCl <sub>3</sub> as solvent.                                                                                                                                                                                                          | 74-85 |
| <b>Scheme S1</b>         | Control experiment scheme 3B.                                                                                                                                                                                                                                                                                | 86    |
| <b>Figure S163</b>       | <sup>1</sup> H NMR spectrum of 3c taking CDCl <sub>3</sub> as solvent.                                                                                                                                                                                                                                       | 86    |
| <b>Figure S164</b>       | <sup>1</sup> H NMR spectrum of 3c' taking CDCl <sub>3</sub> as solvent.                                                                                                                                                                                                                                      | 86    |
| <b>Scheme S2</b>         | Control experiment scheme 5B.                                                                                                                                                                                                                                                                                | 87    |
| <b>Figure S165</b>       | <sup>1</sup> H NMR spectrum of 3ac taking CDCl <sub>3</sub> as solvent.                                                                                                                                                                                                                                      | 87    |
| <b>Figure S166</b>       | <sup>1</sup> H NMR spectrum of 3ac' taking CDCl <sub>3</sub> as solvent.                                                                                                                                                                                                                                     | 87    |
| <b>Figure S167</b>       | (A) GC-MS spectrum of the reaction mixture of scheme 3D. (B) GC-MS mass distribution for ethylbenzene (C) GC-MS mass distribution for styrene.                                                                                                                                                               | 88    |
| <b>Figure S168</b>       | (A) GC-MS spectrum of the reaction mixture of scheme 5D. (B) GC-MS mass distribution for ethylbenzene (C) GC-MS mass distribution for styrene.                                                                                                                                                               | 89    |
| <b>Figure S169-S172.</b> | <sup>1</sup> H NMR and <sup>13</sup> C NMR spectrum of 5ha-5hb taking CDCl <sub>3</sub> as solvent.                                                                                                                                                                                                          | 90-91 |
| <b>Figure S173</b>       | The ESI-MS spectrum of Co-alkoxide species (A) Experimental Pattern (B) Simulated Pattern.                                                                                                                                                                                                                   | 92    |
| <b>Figure S174</b>       | The ESI-MS spectrum of Co-H species (A) Experimental Pattern (B) Simulated Pattern.                                                                                                                                                                                                                          | 92    |
| <b>Figure S175</b>       | The ESI-MS spectrum of Co-alkoxide species (A) Experimental Pattern (B) Simulated Pattern.                                                                                                                                                                                                                   | 93    |
| <b>Figure S176</b>       | The ESI-MS spectrum of Co-H species (A) Experimental Pattern (B) Simulated Pattern.                                                                                                                                                                                                                          | 93    |
| <b>Figure S177</b>       | The ESI-MS spectrum of intermediate <b>IV</b> of <i>N</i> -alkylation of anilines (A) Experimental Pattern (B) Simulated Pattern.                                                                                                                                                                            | 94    |
| <b>Scheme S3</b>         | Probable mechanism of <i>N</i> -alkylation of anilines.                                                                                                                                                                                                                                                      | 94    |
| <b>Scheme S4</b>         | Probable mechanism of $\alpha$ -alkylation of ketones.                                                                                                                                                                                                                                                       | 95    |
| <b>Scheme S5</b>         | Probable mechanism of dehydrogenative cyclization.                                                                                                                                                                                                                                                           | 95    |

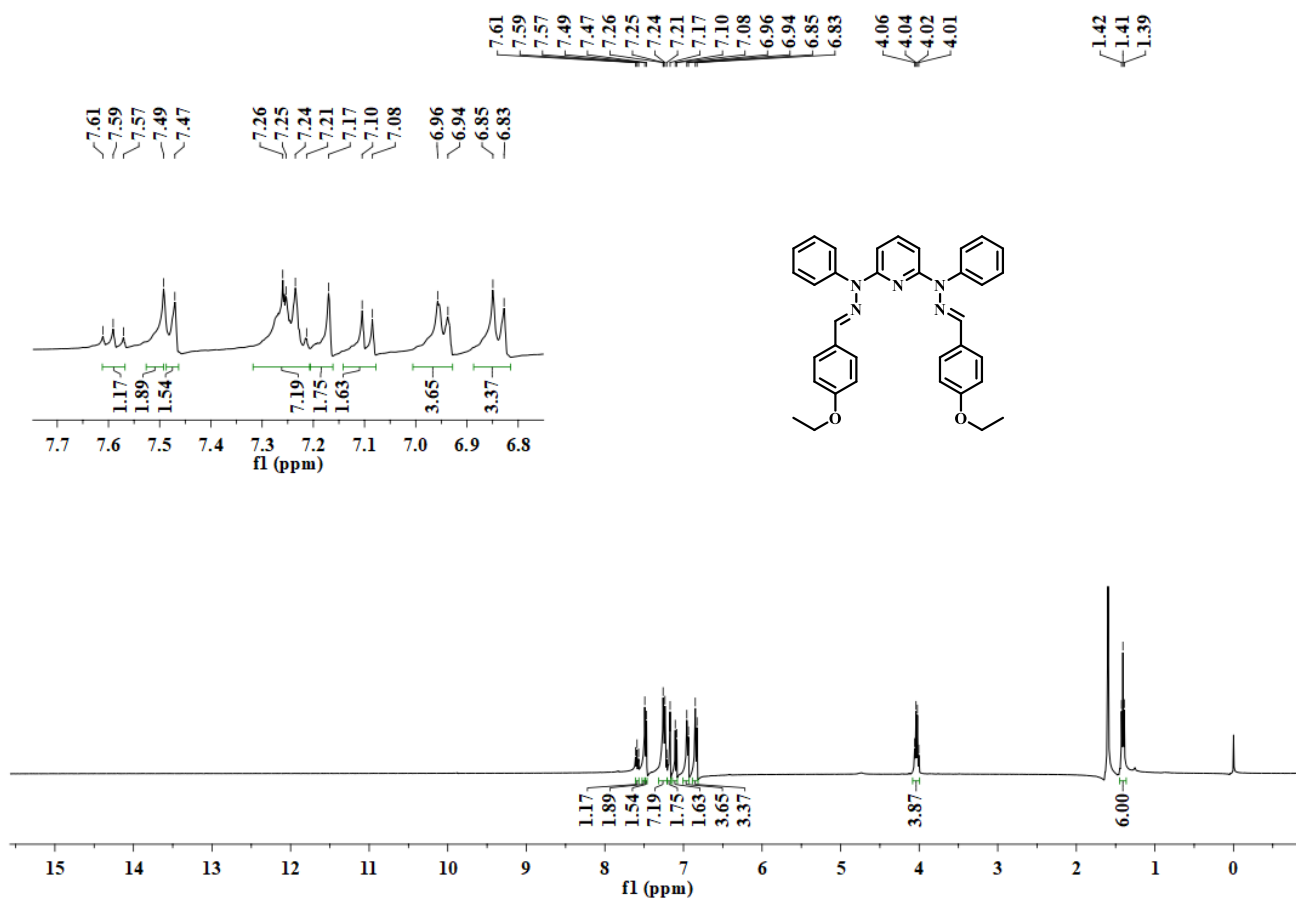

**Figure S1.** <sup>1</sup>H NMR spectrum of L<sup>1</sup> taking CDCl<sub>3</sub> as solvent.

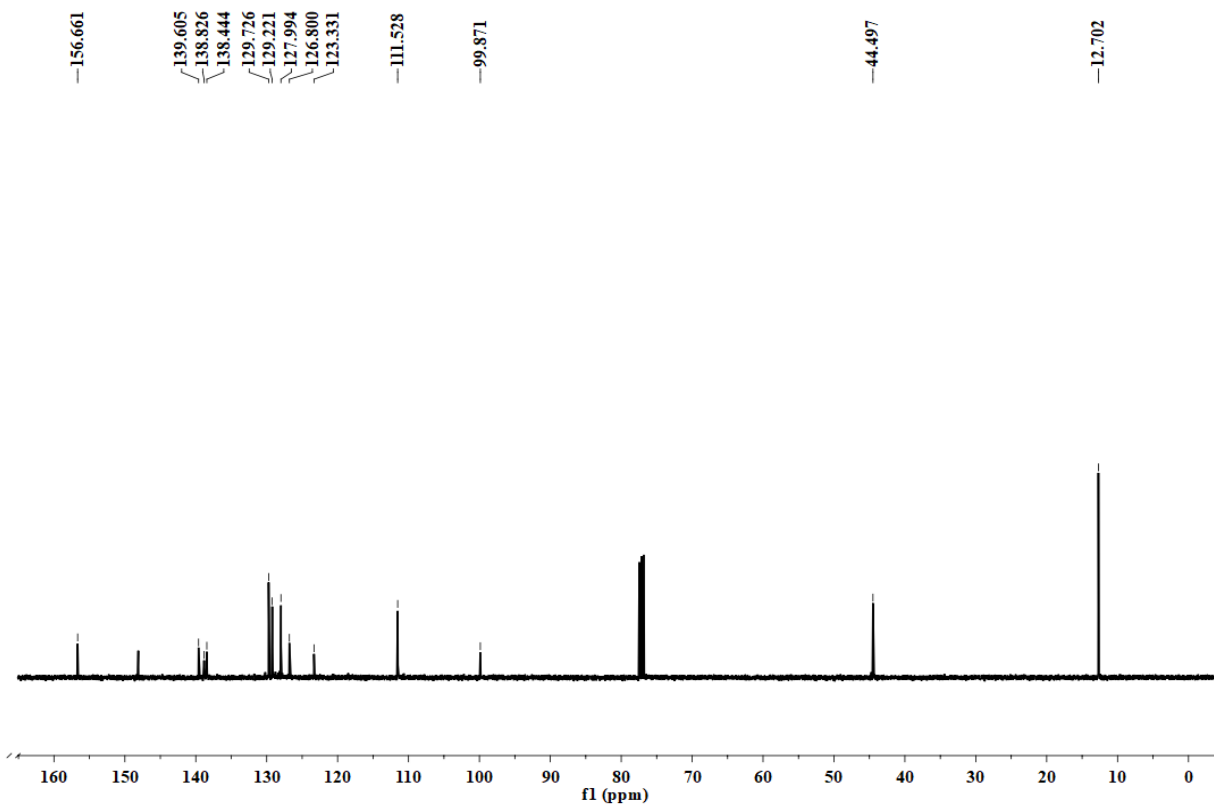

**Figure S2.** <sup>13</sup>C NMR spectrum of L<sup>1</sup> taking CDCl<sub>3</sub> as solvent.

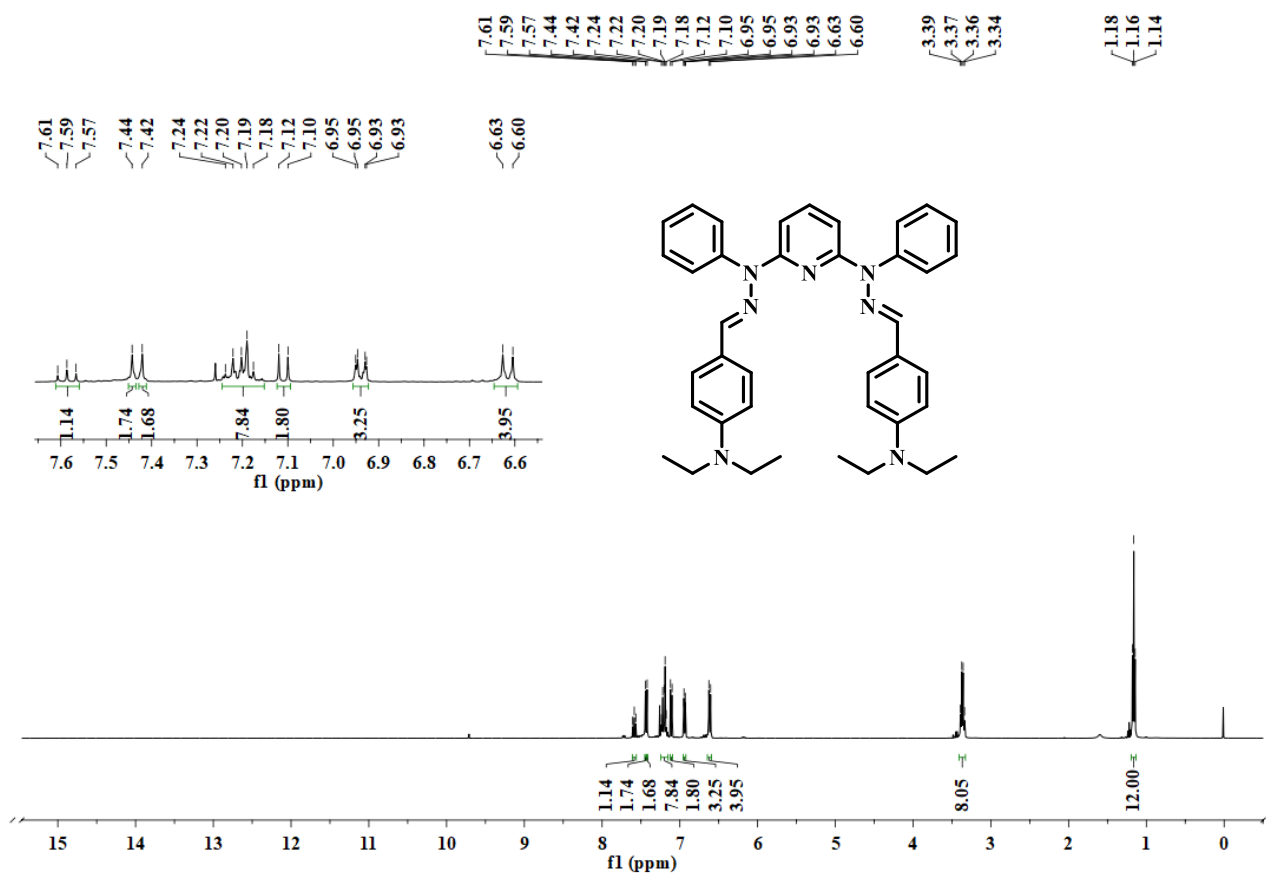

Figure S3.  $^1\text{H}$  NMR spectrum of  $L^2$  taking CDCl<sub>3</sub> as solvent.

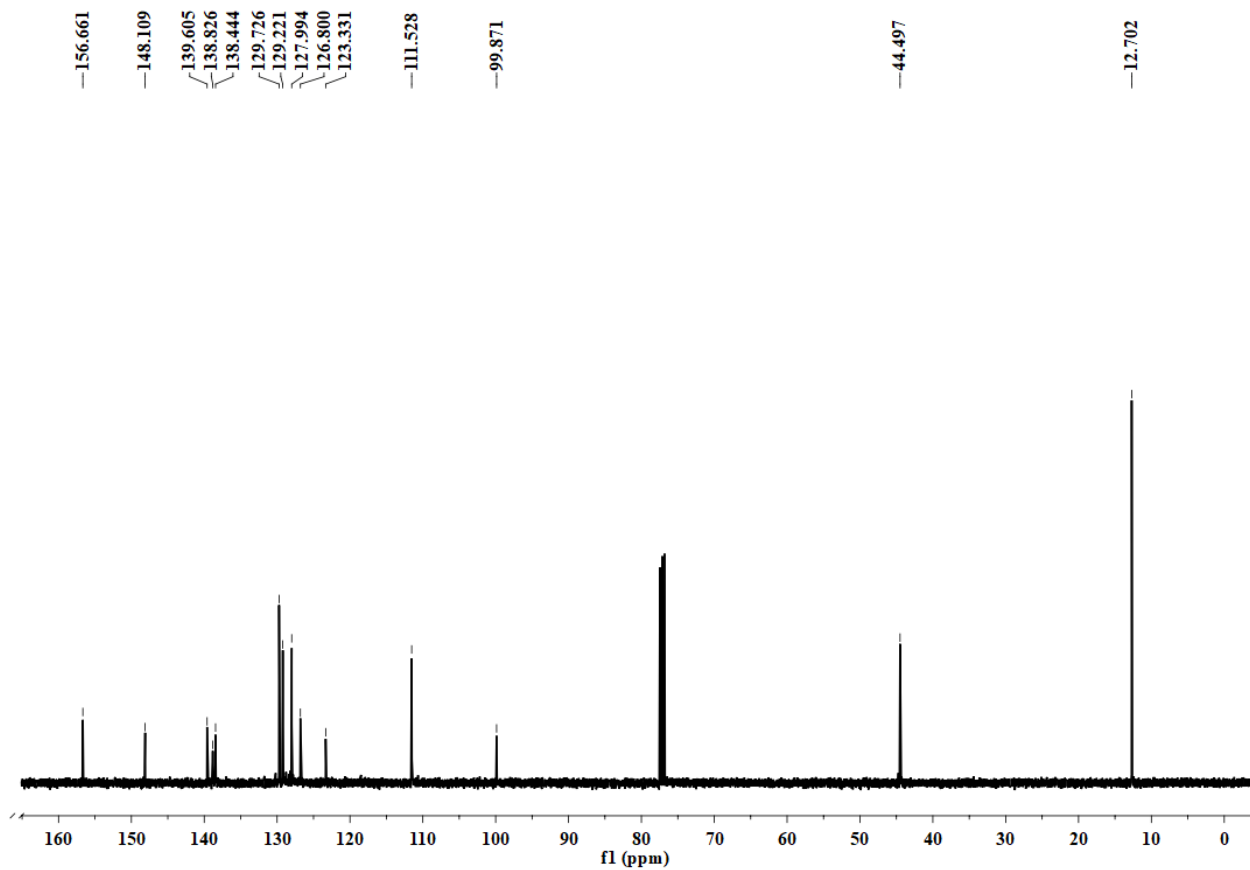

Figure S4.  $^{13}\text{C}$  NMR spectrum of  $L^2$  taking CDCl<sub>3</sub> as solvent.

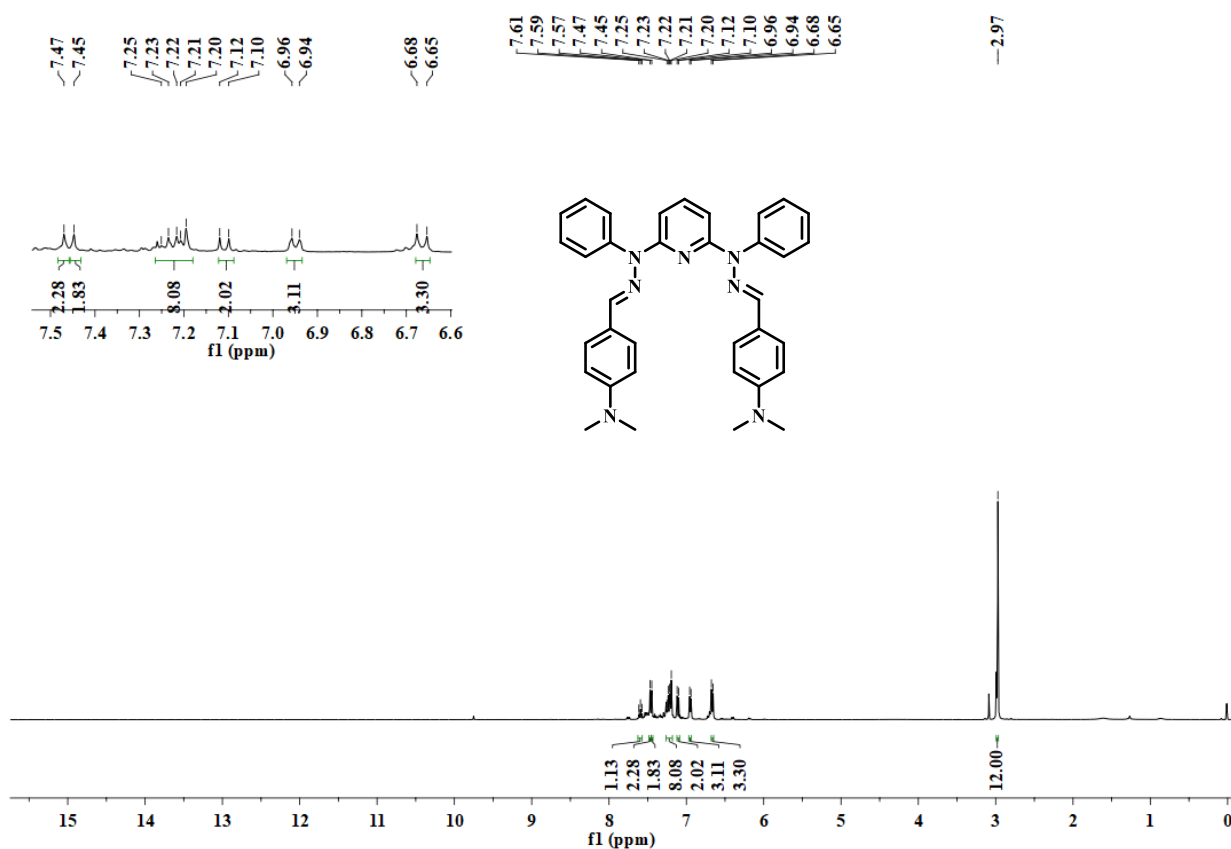

Figure S5. <sup>1</sup>H NMR spectrum of L<sup>3</sup> taking CDCl<sub>3</sub> as solvent.

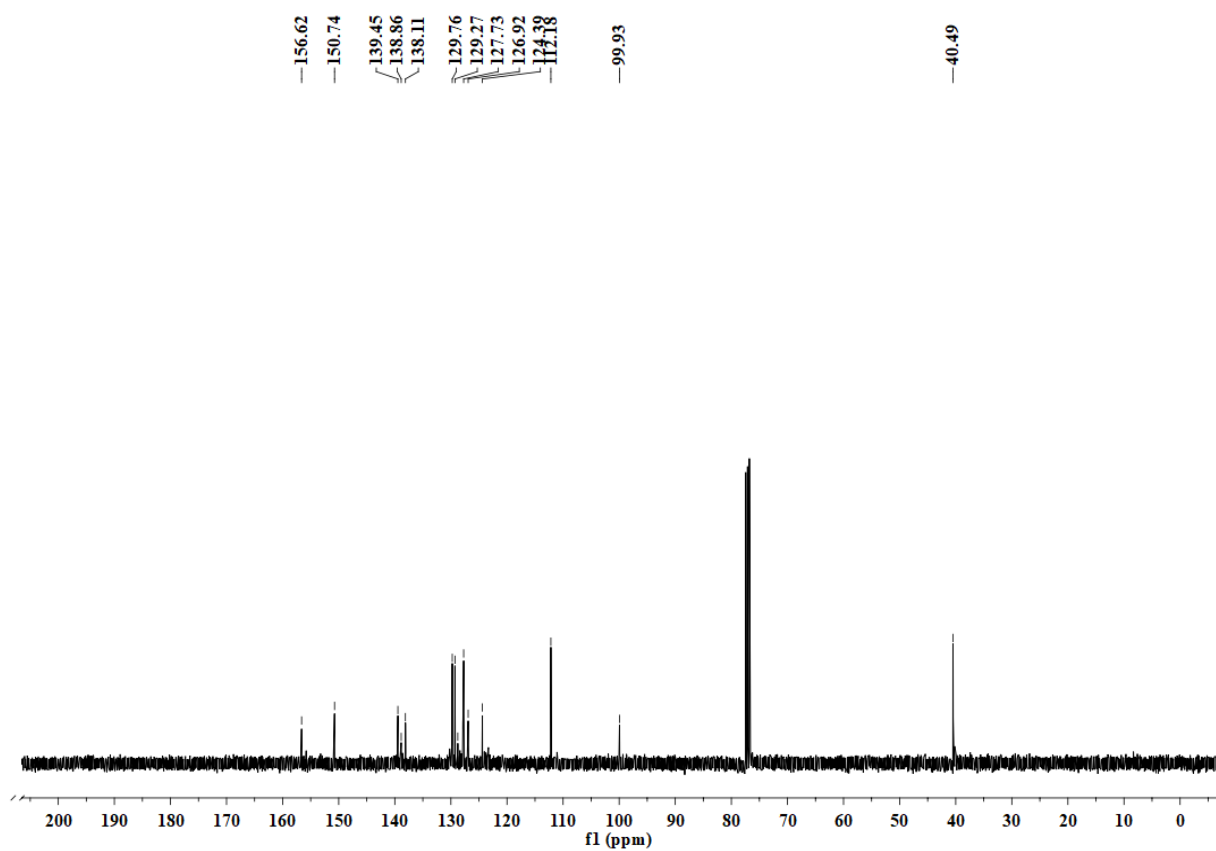

Figure S6. <sup>13</sup>C NMR spectrum of L<sup>3</sup> taking CDCl<sub>3</sub> as solvent.

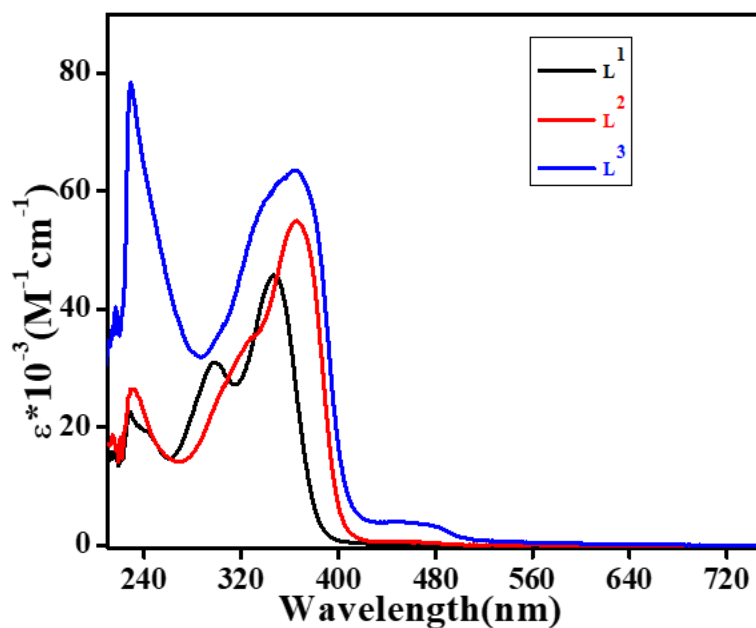

**Figure S7.** Electronic absorption spectra of ligands L<sup>1</sup>-L<sup>3</sup> in dichloromethane solution.

| Molecule       | $\lambda_{\max}$ (nm) | $\epsilon$ (M <sup>-1</sup> cm <sup>-1</sup> ) |
|----------------|-----------------------|------------------------------------------------|
| L <sup>1</sup> | 364, 473              | 64100, 3680                                    |
| L <sup>2</sup> | 326, 366              | 35040, 55430                                   |
| L <sup>3</sup> | 365, 471              | 63510, 3990                                    |

**Table S1.** Spectral data of ligands L<sup>1</sup>-L<sup>3</sup> in dichloromethane solution.

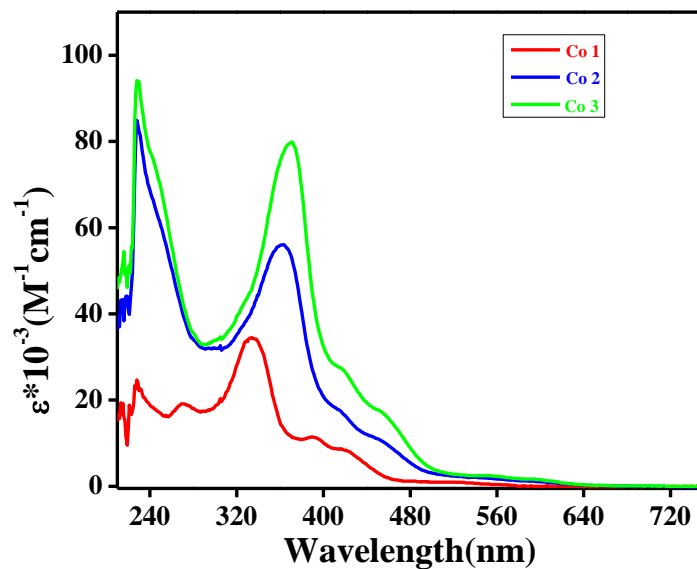

**Figure S8.** Electronic absorption spectra of complexes Co1-Co3 in dichloromethane solution.

| Molecule | $\lambda_{\max}$ (nm) | $\epsilon$ (M <sup>-1</sup> cm <sup>-1</sup> ) |
|----------|-----------------------|------------------------------------------------|
| Co1      | 334, 390, 420         | 35020, 11960, 9220                             |
| Co2      | 356, 418, 454         | 56300, 17060, 10790                            |
| Co3      | 369, 419, 456         | 80400, 27440, 17240                            |

**Table S2.** Spectral data of complexes Co1-Co3 in dichloromethane solution.

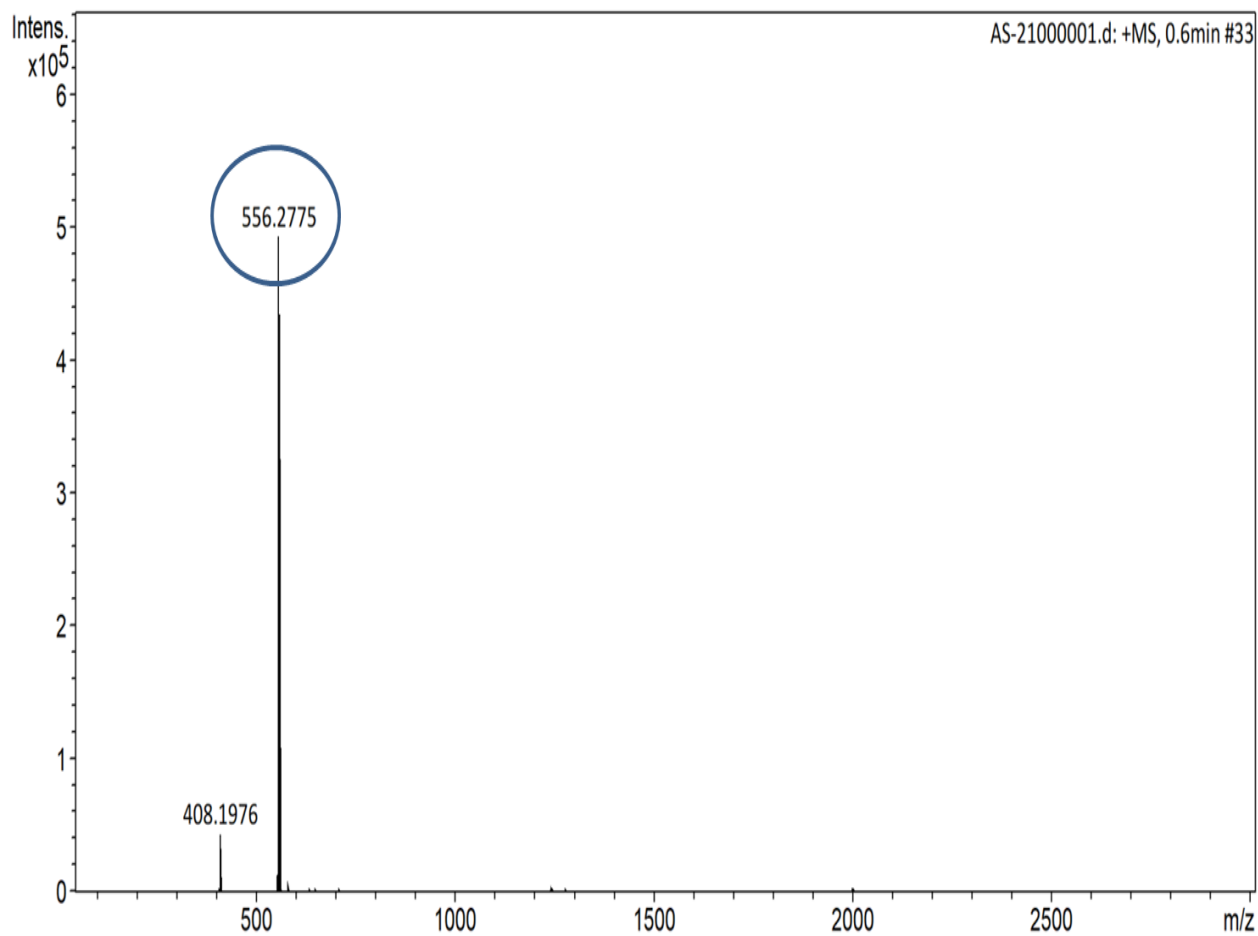

**Figure S9.** ESI-MS of ligand L<sup>1</sup> in acetonitrile solution.

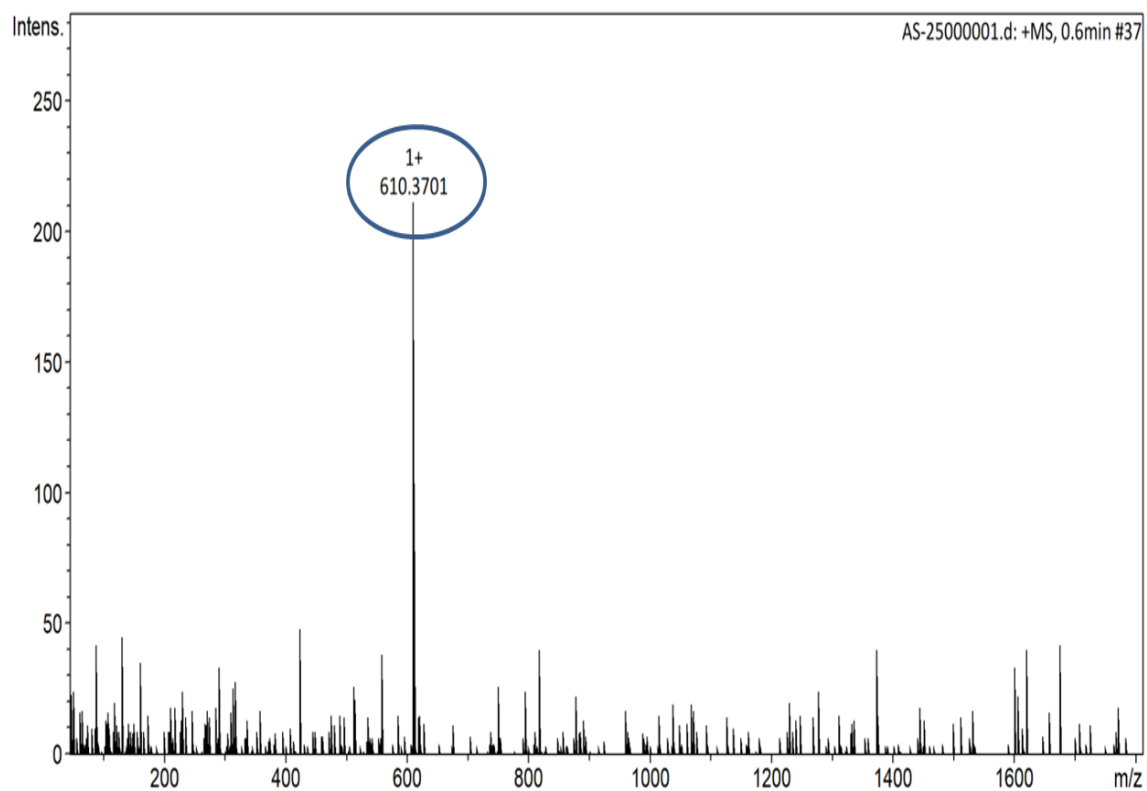

**Figure S10.** ESI-MS of ligand L<sup>2</sup> in acetonitrile solution.

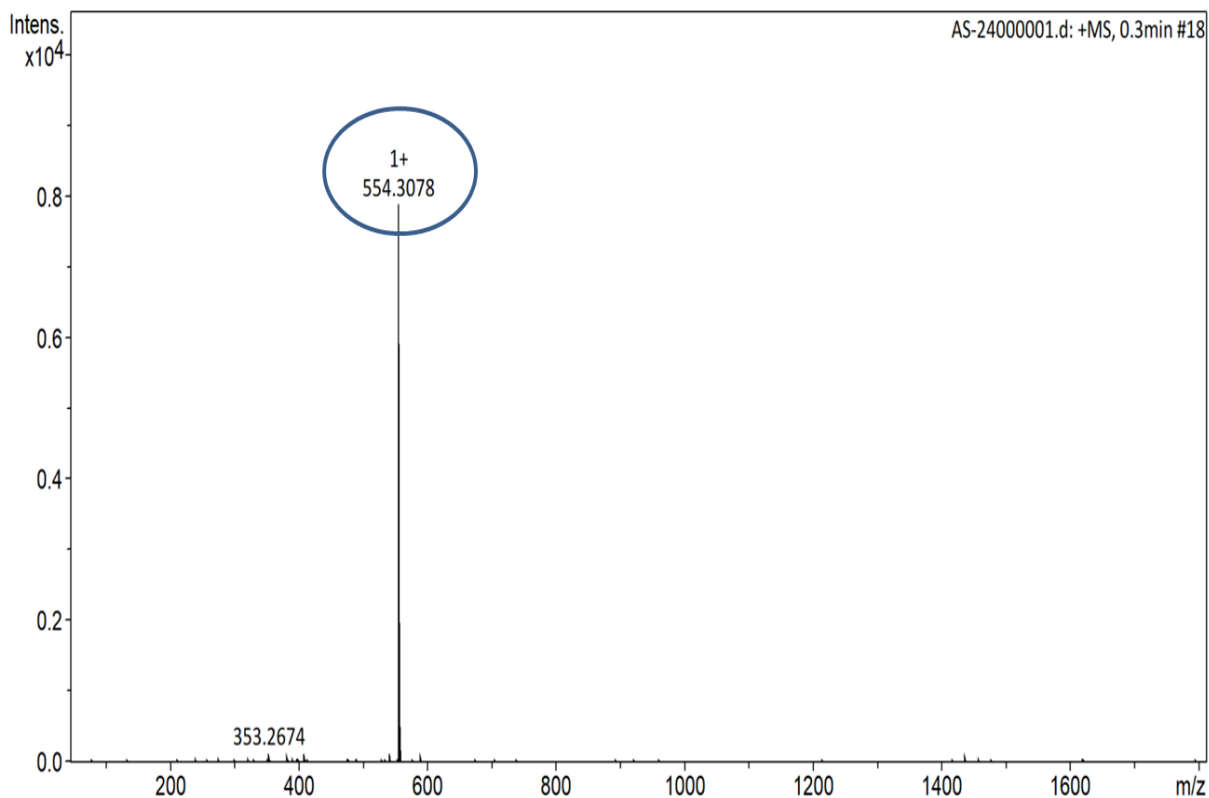

**Figure S11.** ESI-MS of ligand  $L^3$  in acetonitrile solution.

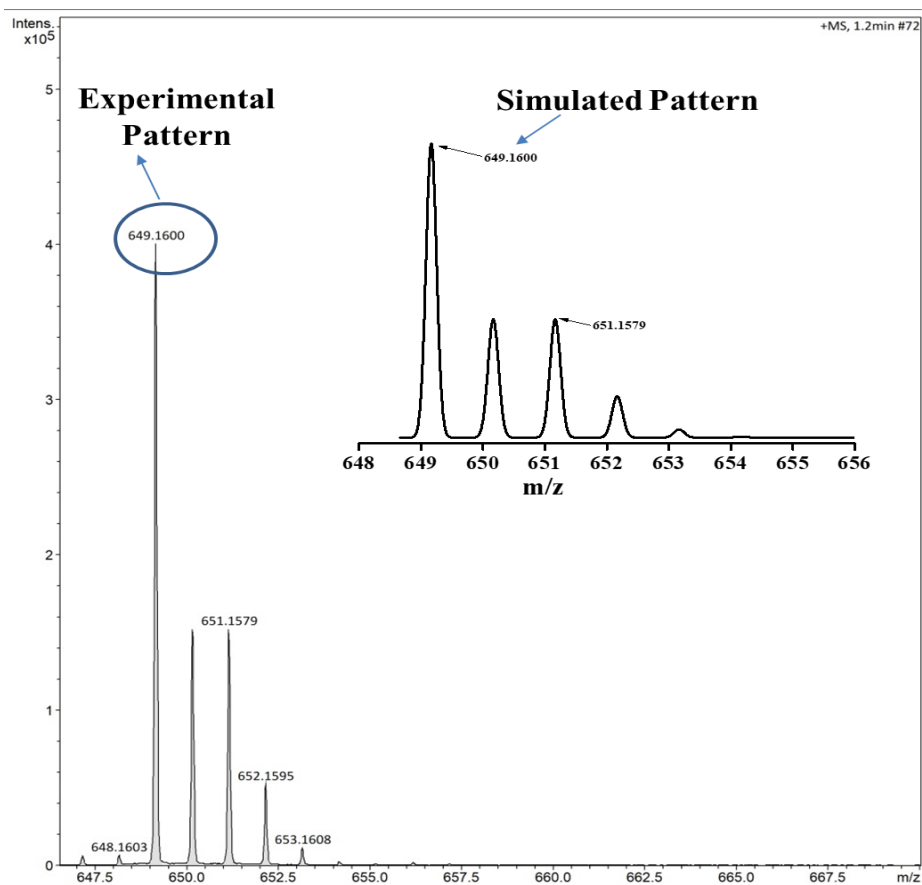

**Figure S12.** ESI-MS of  $Co1$  in acetonitrile solution.



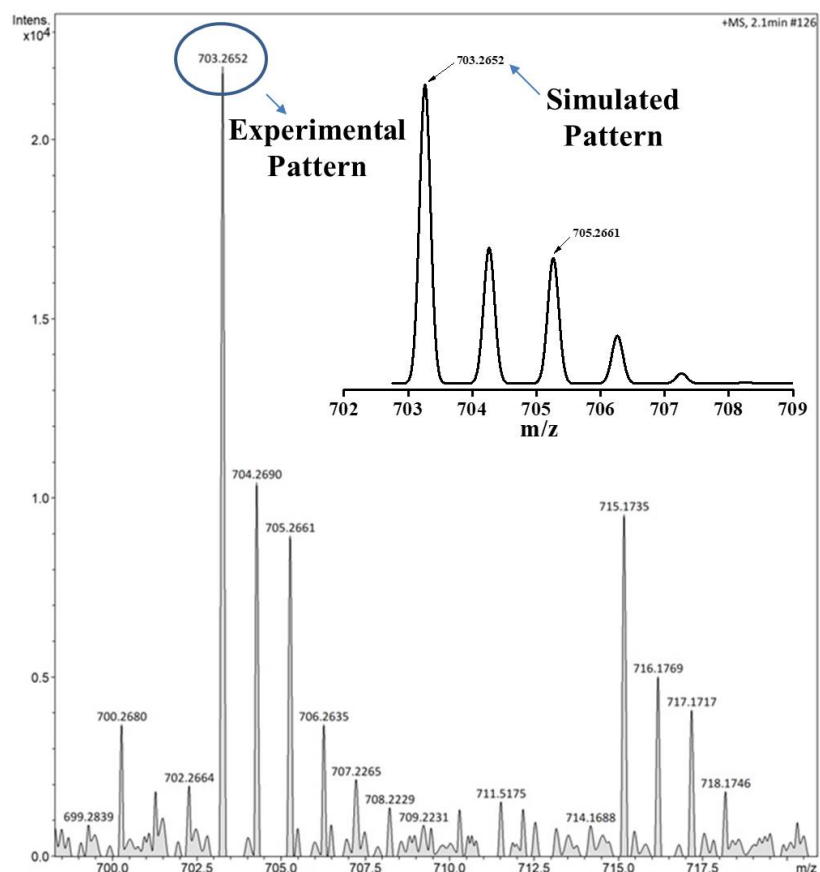

Figure S13. ESI-MS of  $\text{Co}_2$  in acetonitrile solution.

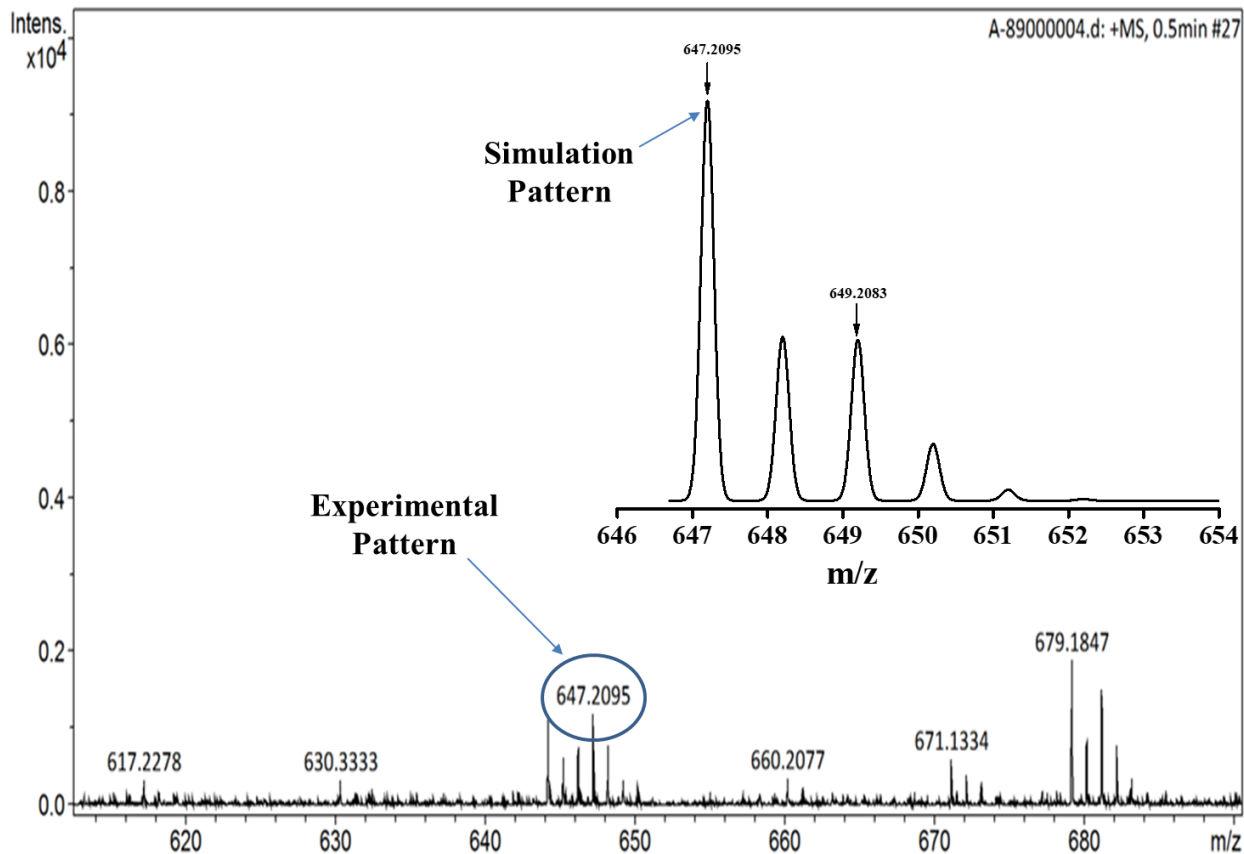

Figure S14. ESI-MS of  $\text{Co}_3$  in acetonitrile solution.

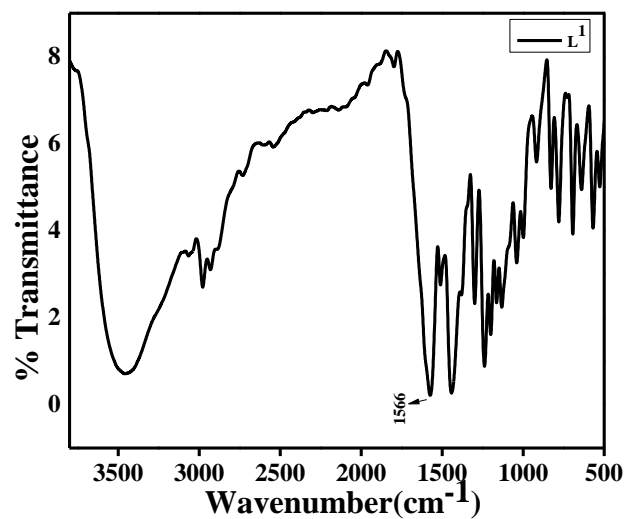

Figure S15. FT-IR spectrum of free ligand L<sup>1</sup>.

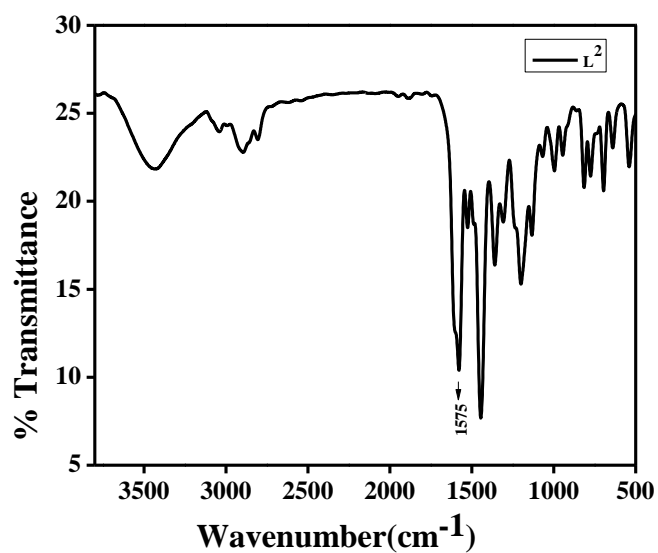

Figure S16. FT-IR spectrum of free ligand L<sup>2</sup>.

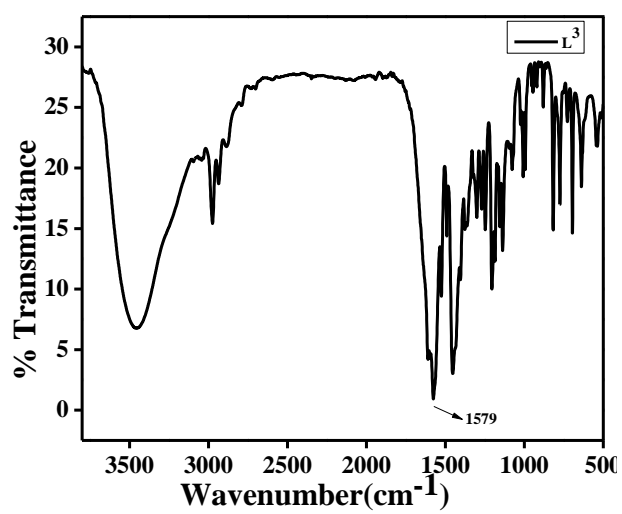

Figure S17. FT-IR spectrum of free ligand L<sup>3</sup>.

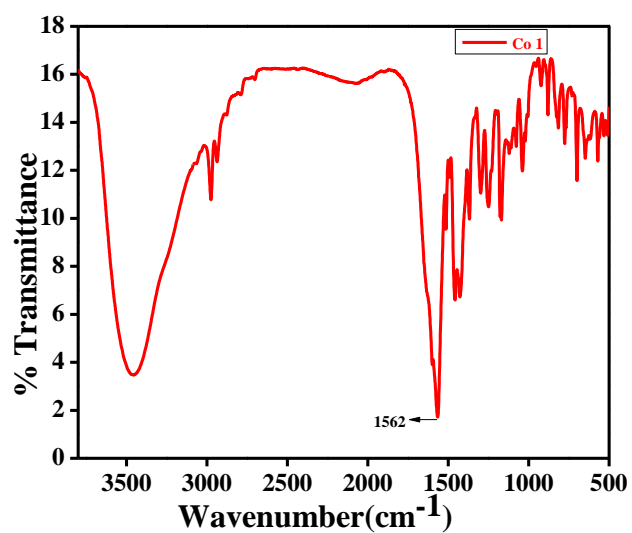

**Figure S18.** FT-IR spectrum of complex **Co1**.

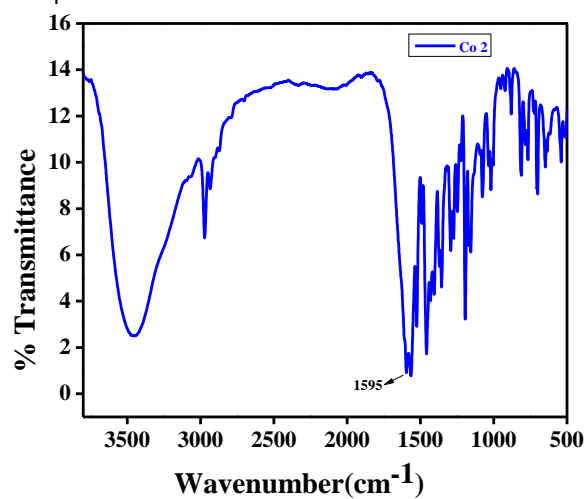

**Figure S19.** FT-IR spectrum of complex **Co2**.

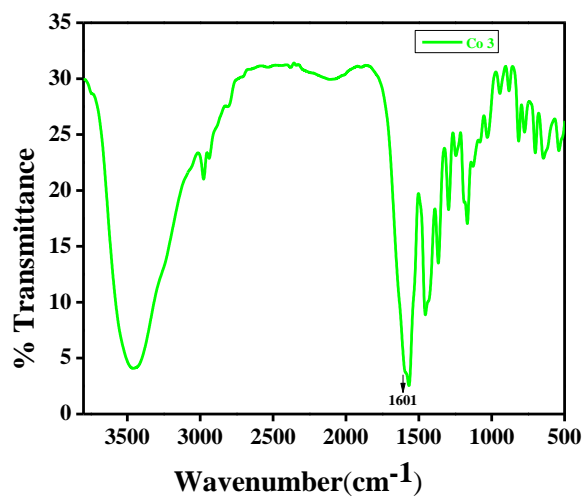

**Figure S20.** FT-IR spectrum of complex **Co3**.

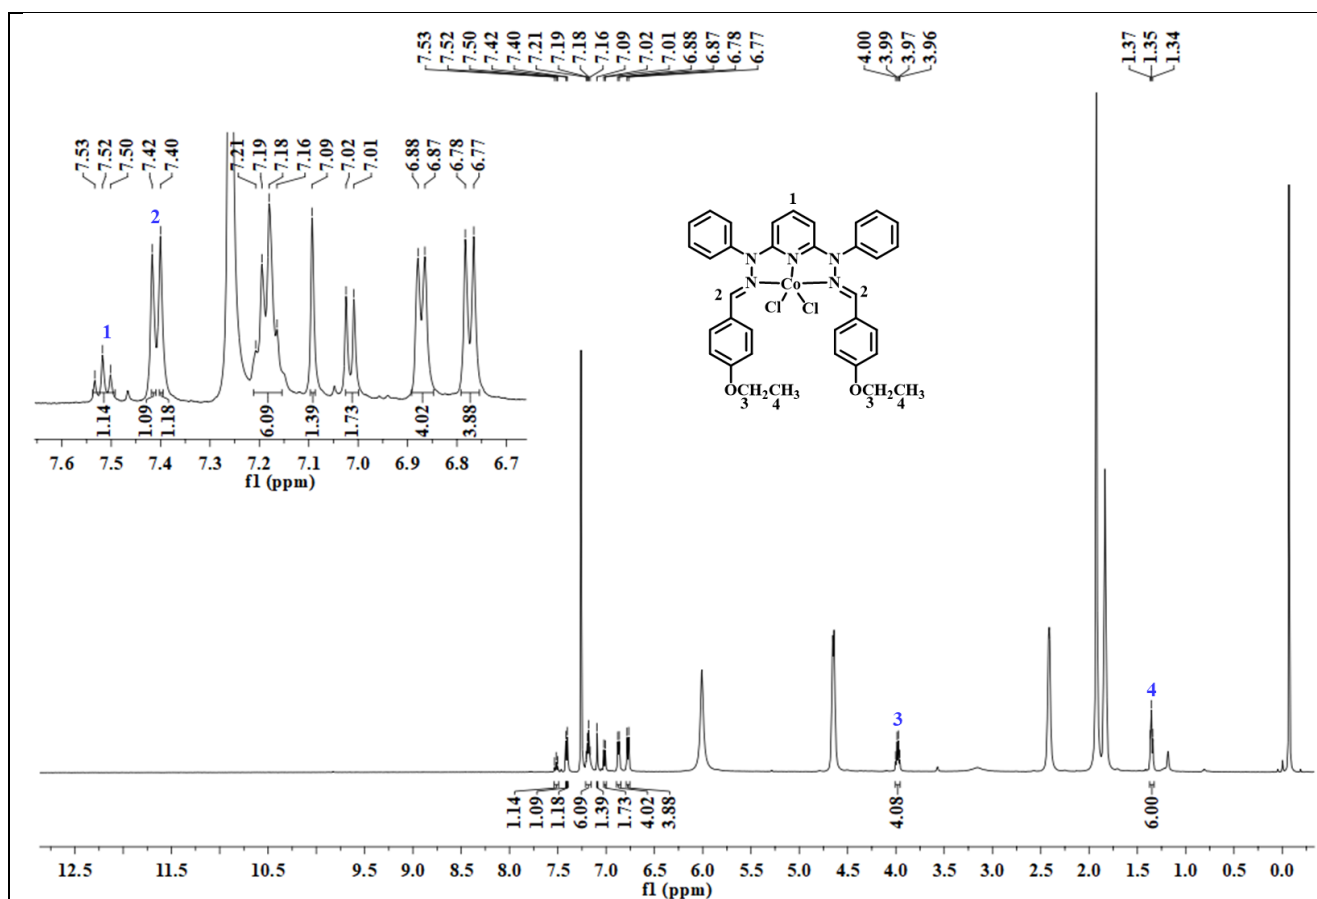

**Figure S21.**  $^1\text{H}$  NMR spectrum of **Co1** taking  $\text{CDCl}_3$  as solvent.

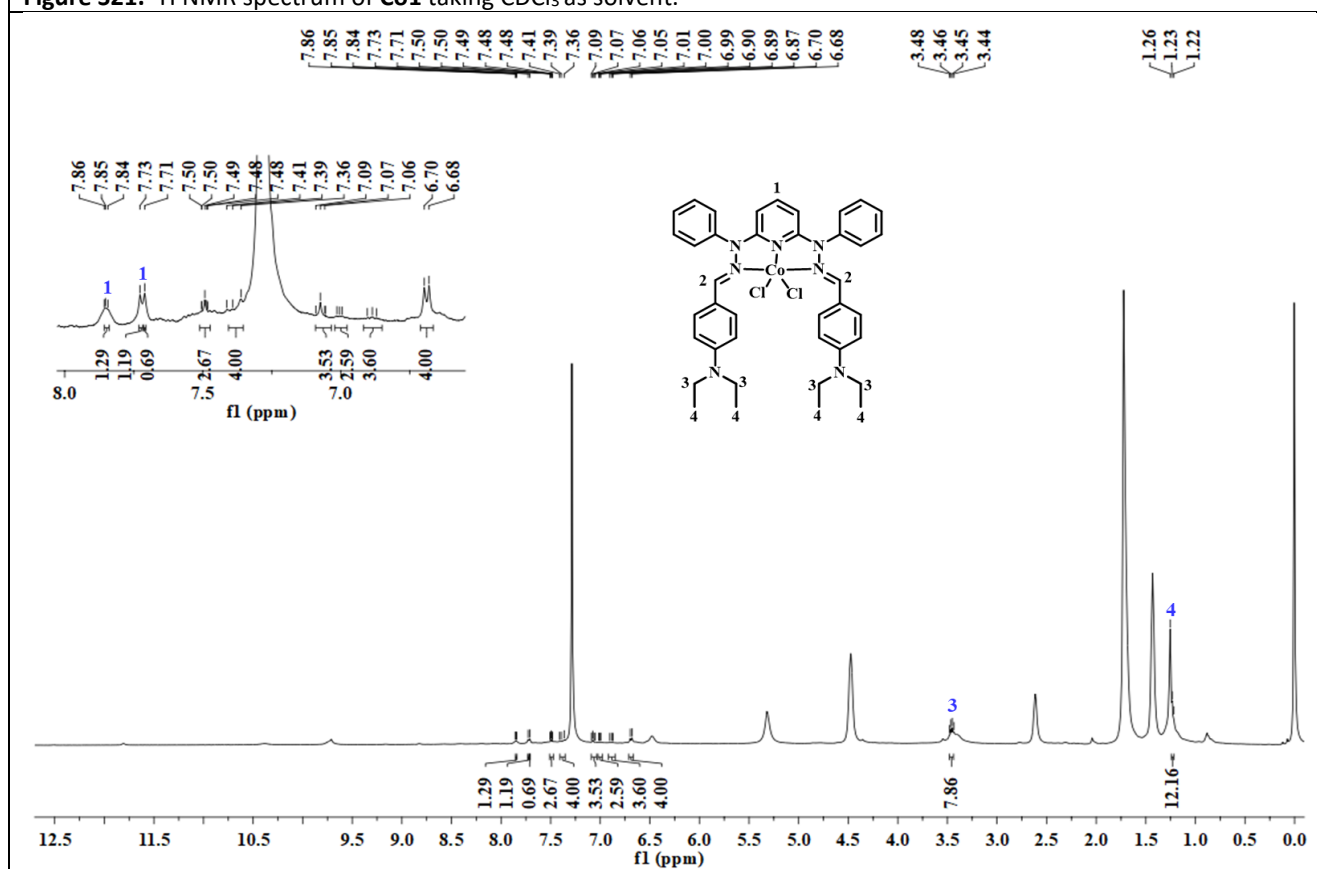

**Figure S22.**  $^1\text{H}$  NMR spectrum of **Co2** taking  $\text{CDCl}_3$  as solvent.

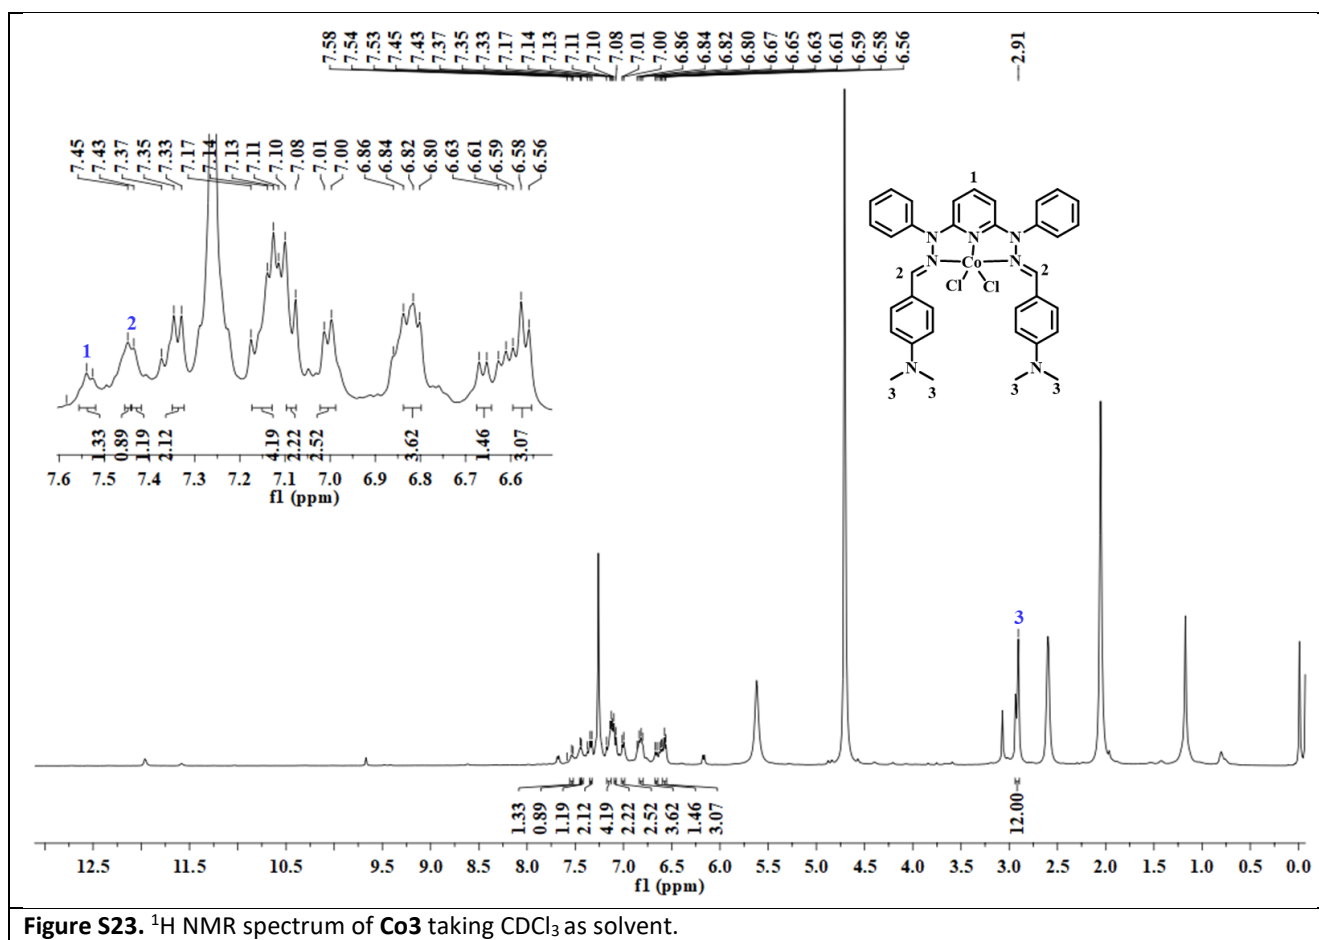

**Figure S23.**  $^1\text{H}$  NMR spectrum of **Co3** taking  $\text{CDCl}_3$  as solvent.

| Table S3. Crystal data and structural refinement parameters for complexes <b>Co1</b> and <b>Co3</b> . |                                                           |                                                           |
|-------------------------------------------------------------------------------------------------------|-----------------------------------------------------------|-----------------------------------------------------------|
| Empirical formula                                                                                     | C35 H33 Cl2 Co N5 O2 [+ solvent]                          | C35 H35 Cl2 Co N7                                         |
| Color                                                                                                 | Clear light red                                           | Red                                                       |
| Formula weight                                                                                        | 685.49                                                    | 683.53                                                    |
| Temperature (K)                                                                                       | 150                                                       | 293(2)                                                    |
| $\lambda$ (Å) (Mo-K $\alpha$ )                                                                        | 0.71073                                                   | 0.71073                                                   |
| Crystal system                                                                                        | monoclinic                                                | monoclinic                                                |
| Space group                                                                                           | <i>C</i> 1 2/ <i>c</i> 1                                  | <i>P</i> 1 21/ <i>n</i> 1                                 |
| <i>a</i> (Å)                                                                                          | 38.476(2)                                                 | 10.1685(6)                                                |
| <i>b</i> (Å)                                                                                          | 16.3803(10)                                               | 35.634(2)                                                 |
| <i>c</i> (Å)                                                                                          | 11.5978(7)                                                | 10.5820(7)                                                |
| $\alpha$ (°)                                                                                          | 90                                                        | 90                                                        |
| $\beta$ (°)                                                                                           | 93.820(5)                                                 | 114.904(4)                                                |
| $\gamma$ (°)                                                                                          | 90                                                        | 90                                                        |
| <i>Z</i>                                                                                              | 8                                                         | 4                                                         |
| $\rho_{\text{calc}}$ (gcm <sup>-3</sup> )                                                             | 1.249                                                     | 1.306                                                     |
| <i>F</i> (000)                                                                                        | 2840.0                                                    | 1420.0                                                    |
| $\theta$ range for data collection                                                                    | 2.608–32.812                                              | 2.198–28.416                                              |
| Index ranges                                                                                          | –42< <i>h</i> <56, –24< <i>k</i> <21<br>–16< <i>l</i> <16 | –13< <i>h</i> <11, –47< <i>k</i> <40<br>–14< <i>l</i> <13 |
| Refinement method                                                                                     | Full matrix least-squares on <i>F</i> <sup>2</sup>        | Full matrix least-squares on <i>F</i> <sup>2</sup>        |
| Data/restraint/parameters                                                                             | 12566/0/408                                               | 8596/0/410                                                |
| GOF <sup>a</sup> on <i>F</i> <sup>2</sup>                                                             | 0.961                                                     | 1.076                                                     |
| <i>R</i> <sub>1</sub> <sup>b</sup> [ <i>I</i> > 2 $\sigma$ ( <i>I</i> )]                              | 0.0887                                                    | 0.0994                                                    |
| <i>R</i> <sub>1</sub> (all data)                                                                      | 0.2089                                                    | 0.1612                                                    |
| <i>wR</i> <sub>2</sub> <sup>c</sup> [ <i>I</i> > 2 $\sigma$ ( <i>I</i> )]                             | 0.1893                                                    | 0.2439                                                    |
| <i>wR</i> <sub>2</sub> (all data)                                                                     | 0.2606                                                    | 0.2703                                                    |

<sup>a</sup>GOF =  $[\sum[w(\text{Fo}^2 - \text{Fc}^2)^2] / (M - N)]^{1/2}$  (*M* = number of reflections, *N* = number of parameters refined). <sup>b</sup> *R*<sub>1</sub> =  $\sum ||\text{Fo}| - |\text{Fc}|| / \sum |\text{Fo}|$ , <sup>c</sup> *wR*<sub>2</sub> =  $[\sum[w(\text{Fo}^2 - \text{Fc}^2)_2] / \sum [w(\text{Fo}_2)_2]]^{1/2}$

| Table S4. Selected bond lengths and bond angles of complex <b>Co1</b> . |            |                |            |
|-------------------------------------------------------------------------|------------|----------------|------------|
| Bond Lengths (Å)                                                        |            | Bond Angles(°) |            |
| Co1—N1                                                                  | 2.233(4)   | N3—Co1—N1      | 76.42(13)  |
| Co1—N3                                                                  | 1.988(3)   | N3—Co1—N5      | 77.53(13)  |
| Co1—N5                                                                  | 2.236(4)   | N1—Co1—N5      | 153.49(12) |
| Co1—Cl1                                                                 | 2.2952(12) | N3—Co1—Cl2     | 120.09(10) |
| Co1—Cl2                                                                 | 2.2499(12) | N3—Co1—Cl1     | 107.97(10) |
|                                                                         |            | N1—Co1—Cl2     | 96.39(10)  |
|                                                                         |            | N1—Co1—Cl1     | 91.37(10)  |
|                                                                         |            | N5—Co1—Cl2     | 92.38(10)  |
|                                                                         |            | N5—Co1—Cl1     | 101.26(9)  |
|                                                                         |            | Cl2—Co1—Cl1    | 131.83(5)  |

| Table S5. Selected bond lengths and bond angles of complex <b>Co3</b> . |          |                |            |
|-------------------------------------------------------------------------|----------|----------------|------------|
| Bond Lengths (Å)                                                        |          | Bond Angles(°) |            |
| Co1—N1                                                                  | 2.192(5) | N3—Co1—N1      | 77.5(2)    |
| Co1—N3                                                                  | 1.980(5) | N3—Co1—N5      | 77.9(2)    |
| Co1—N5                                                                  | 2.169(5) | N1—Co1—N5      | 155.3(2)   |
| Co1—Cl1                                                                 | 2.255(2) | N3—Co1—Cl2     | 105.07(16) |
| Co1—Cl2                                                                 | 2.297(2) | N3—Co1—Cl1     | 112.28(17) |
|                                                                         |          | N1—Co1—Cl2     | 94.85(15)  |
|                                                                         |          | N1—Co1—Cl1     | 93.55(15)  |
|                                                                         |          | N5—Co1—Cl2     | 93.78(17)  |
|                                                                         |          | N5—Co1—Cl1     | 93.51(16)  |
|                                                                         |          | Cl2—Co1—Cl1    | 142.64(8)  |

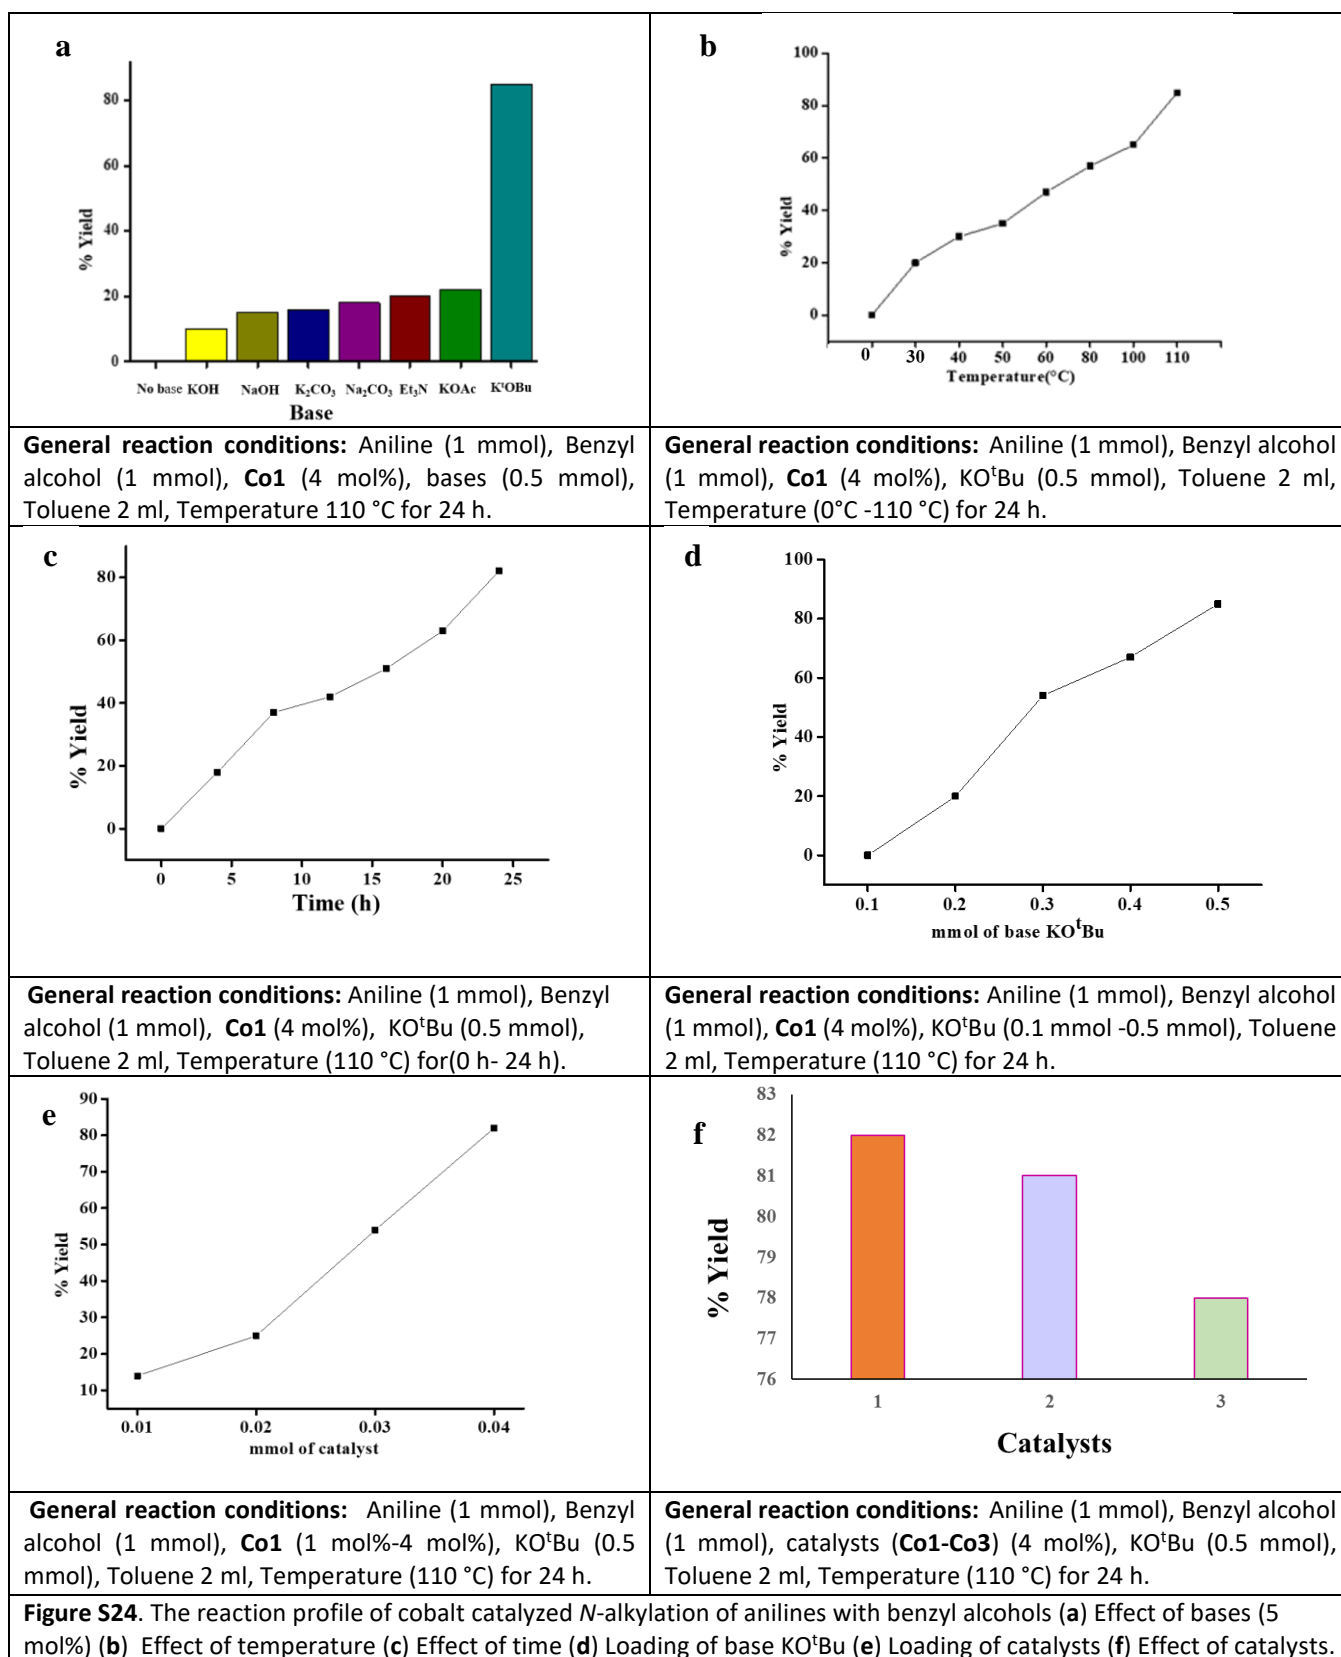

**Figure S24.** The reaction profile of cobalt catalyzed *N*-alkylation of anilines with benzyl alcohols (a) Effect of bases (5 mol%) (b) Effect of temperature (c) Effect of time (d) Loading of base KO<sup>t</sup>Bu (e) Loading of catalysts (f) Effect of catalysts.

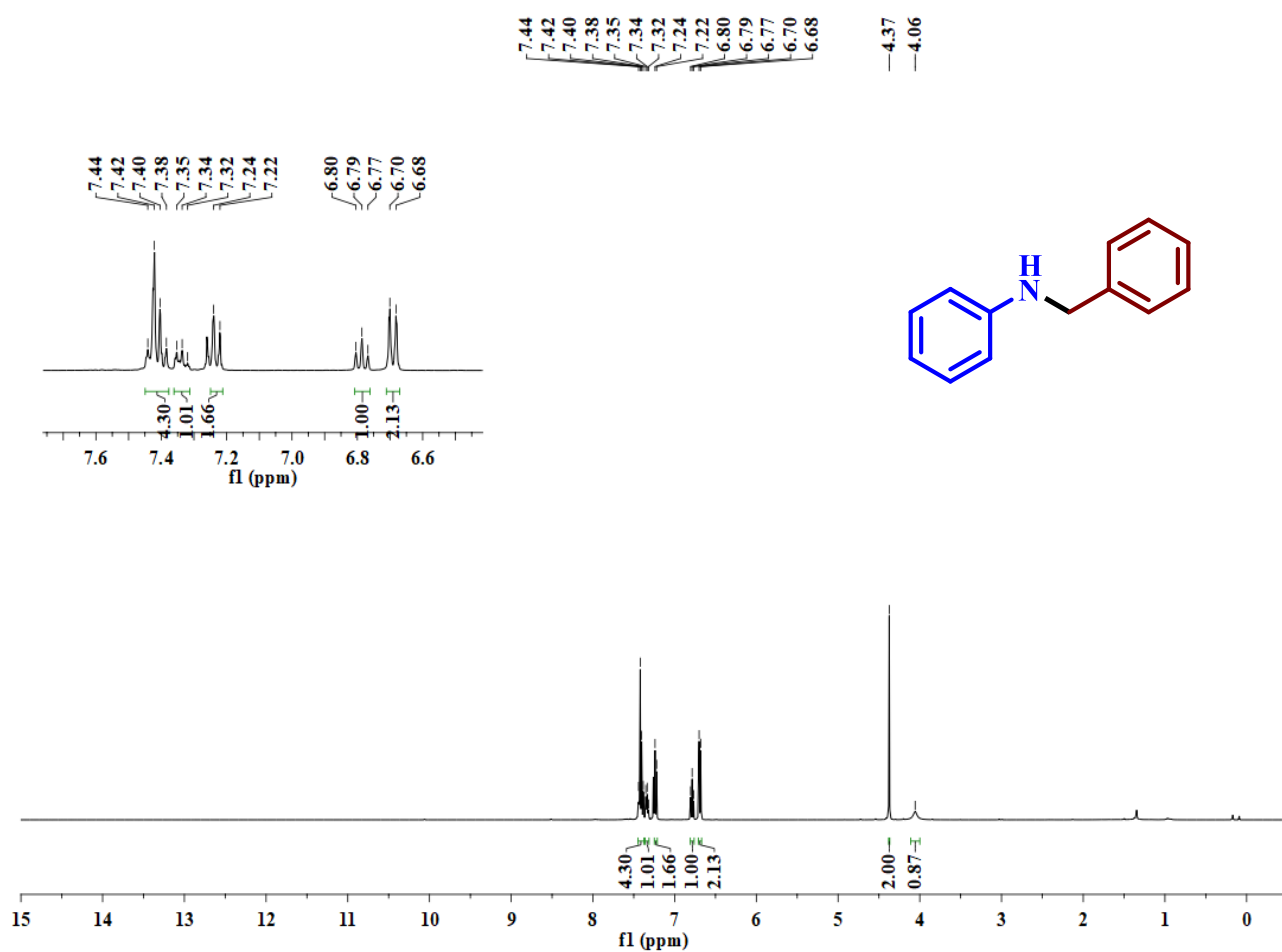

Figure S25. <sup>1</sup>H NMR spectrum of 3aa taking CDCl<sub>3</sub> as solvent.

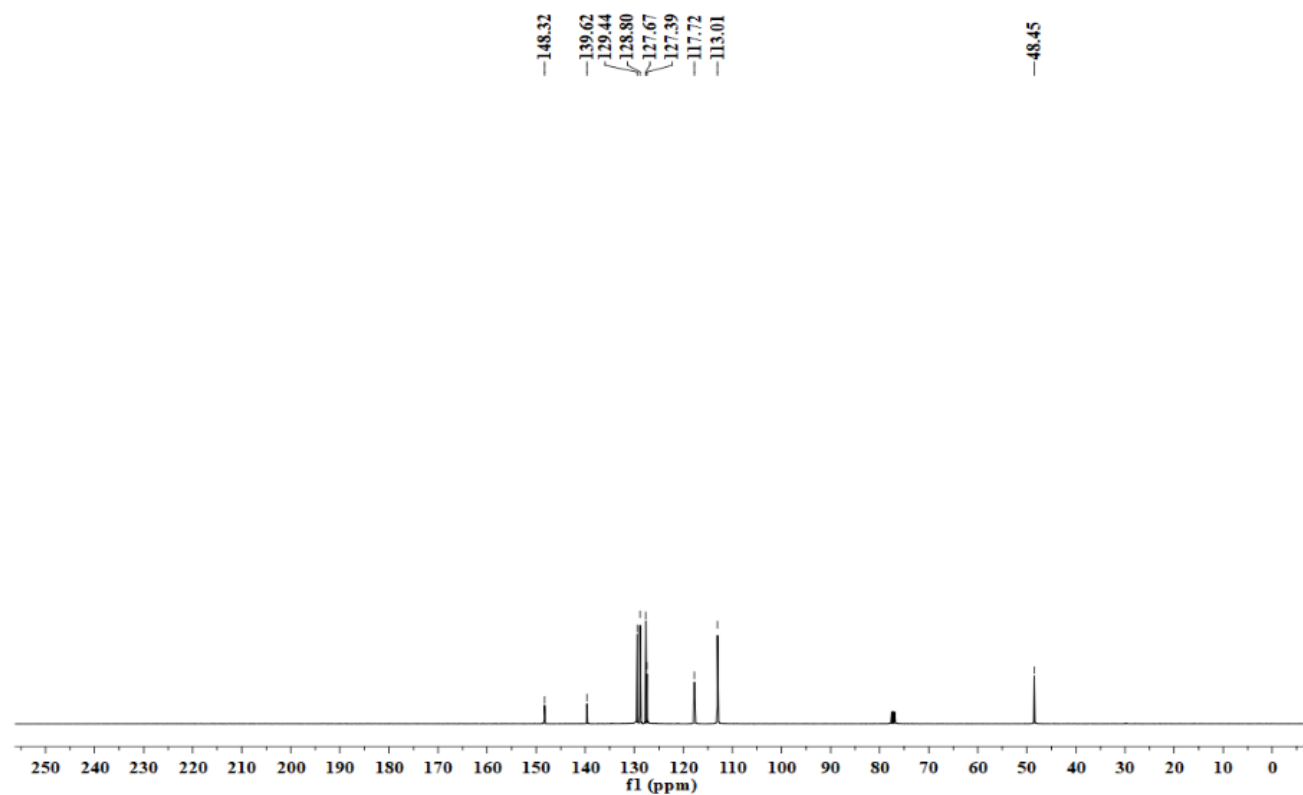

Figure S26. <sup>13</sup>C NMR spectrum of 3aa taking CDCl<sub>3</sub> as solvent.



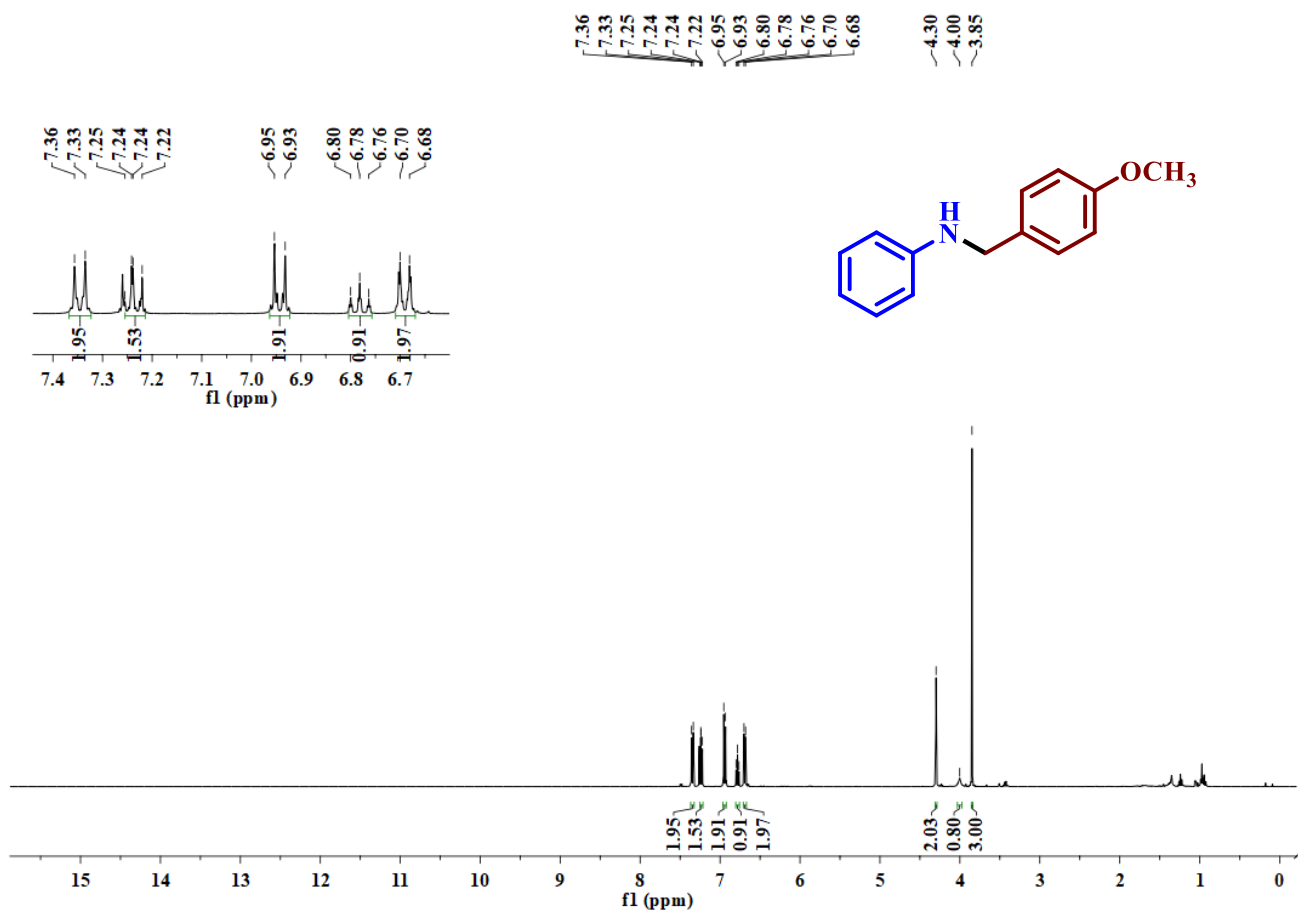

Figure S27. <sup>1</sup>H NMR spectrum of **3ab** taking CDCl<sub>3</sub> as solvent.

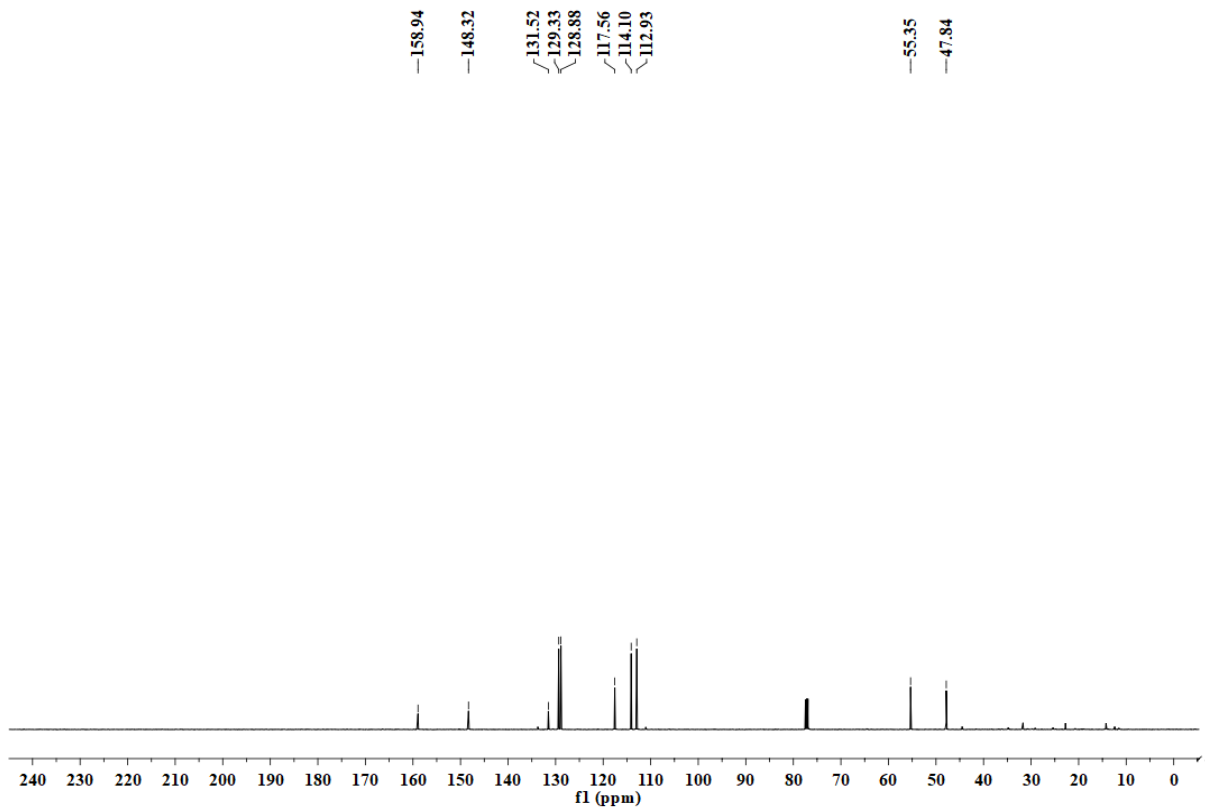

Figure S28. <sup>13</sup>C NMR spectrum of **3ab** taking CDCl<sub>3</sub> as solvent.

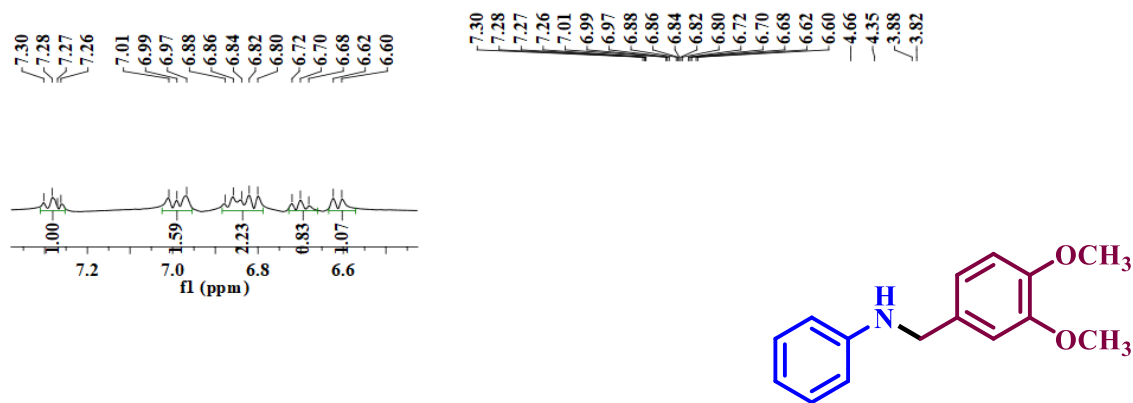

Figure S29. <sup>1</sup>H NMR spectrum of **3ac** taking CDCl<sub>3</sub> as solvent.

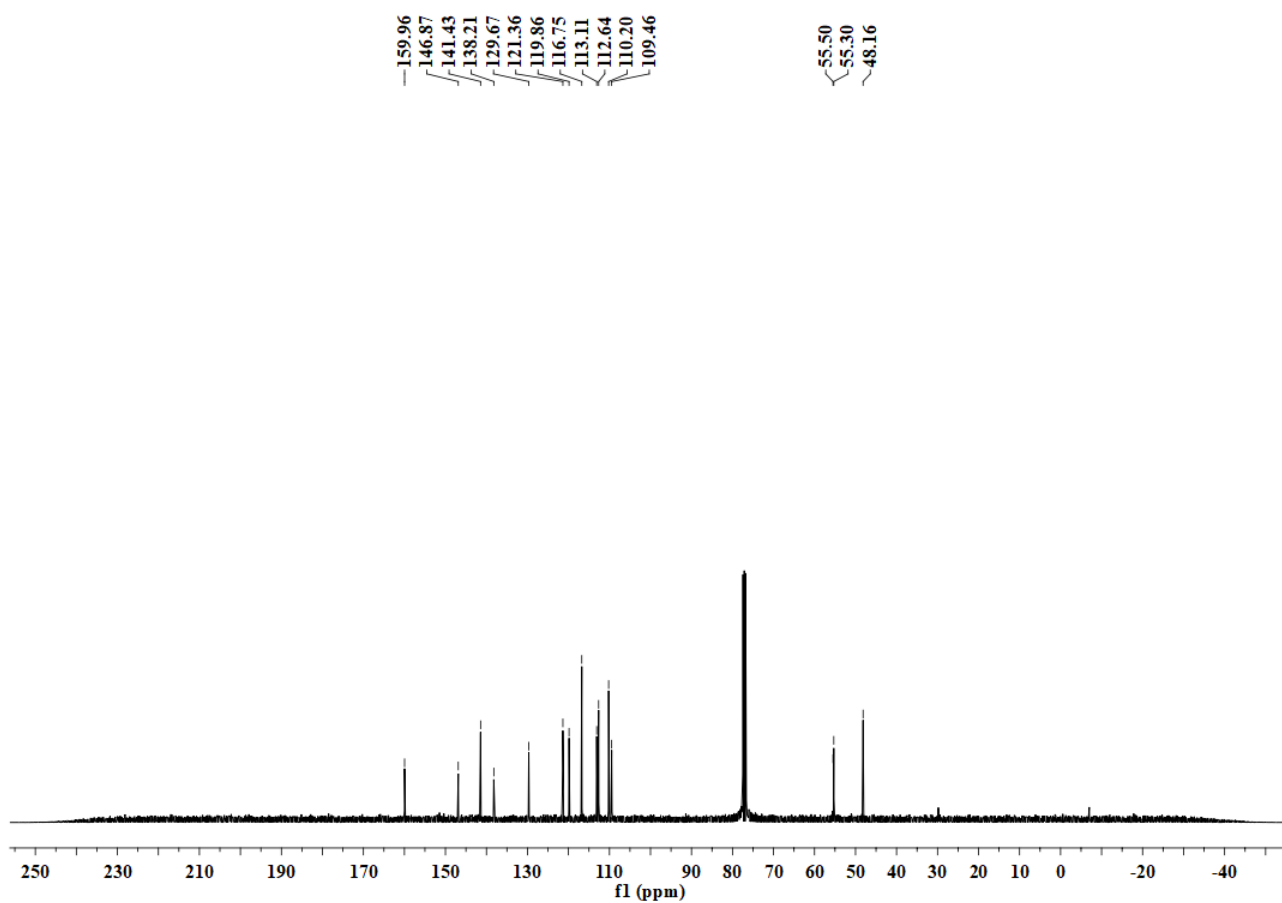

Figure S30. <sup>13</sup>C NMR spectrum of **3ac** taking CDCl<sub>3</sub> as solvent.

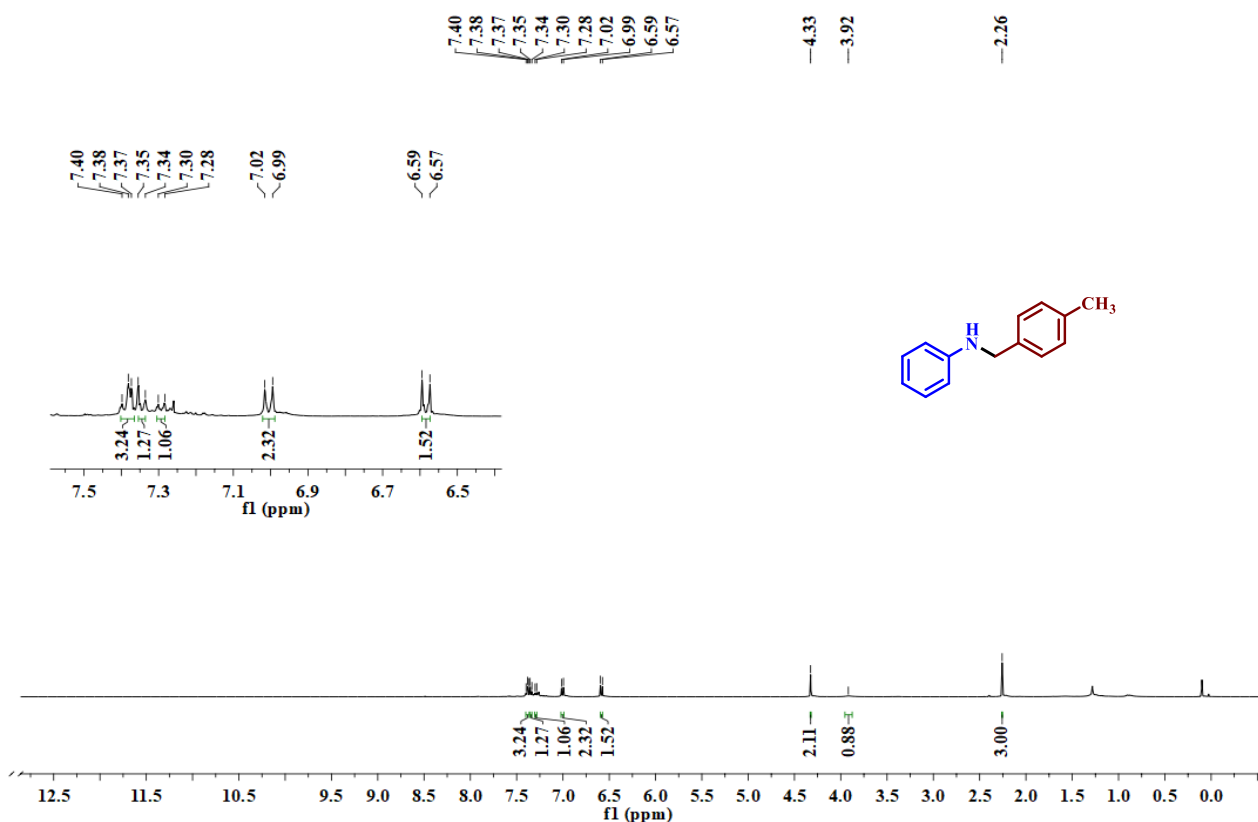

Figure S31. <sup>1</sup>H NMR spectrum of **3ad** taking CDCl<sub>3</sub> as solvent.

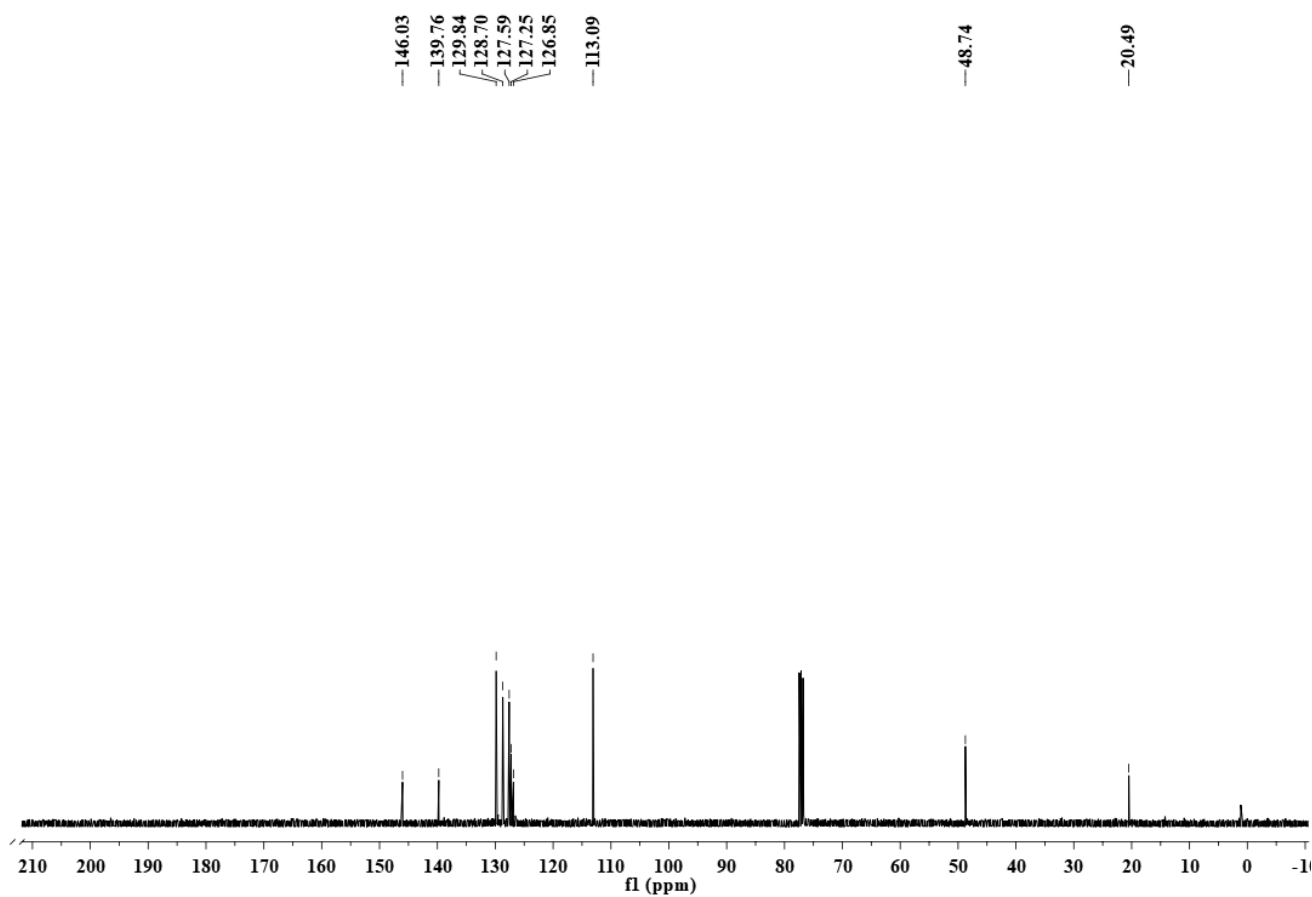

Figure S32. <sup>13</sup>C NMR spectrum of **3ad** taking CDCl<sub>3</sub> as solvent.

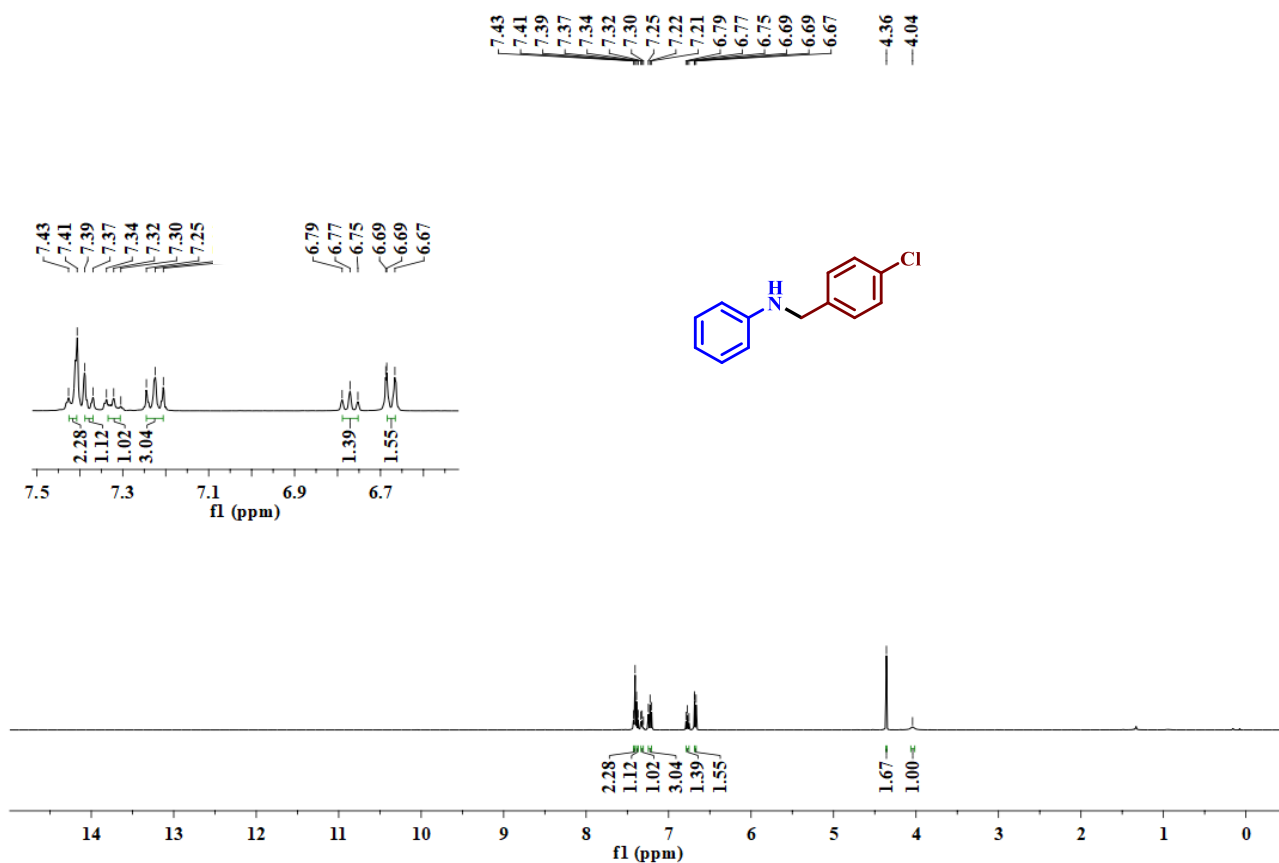

Figure S33. <sup>1</sup>H NMR spectrum of **3ae** taking CDCl<sub>3</sub> as solvent.

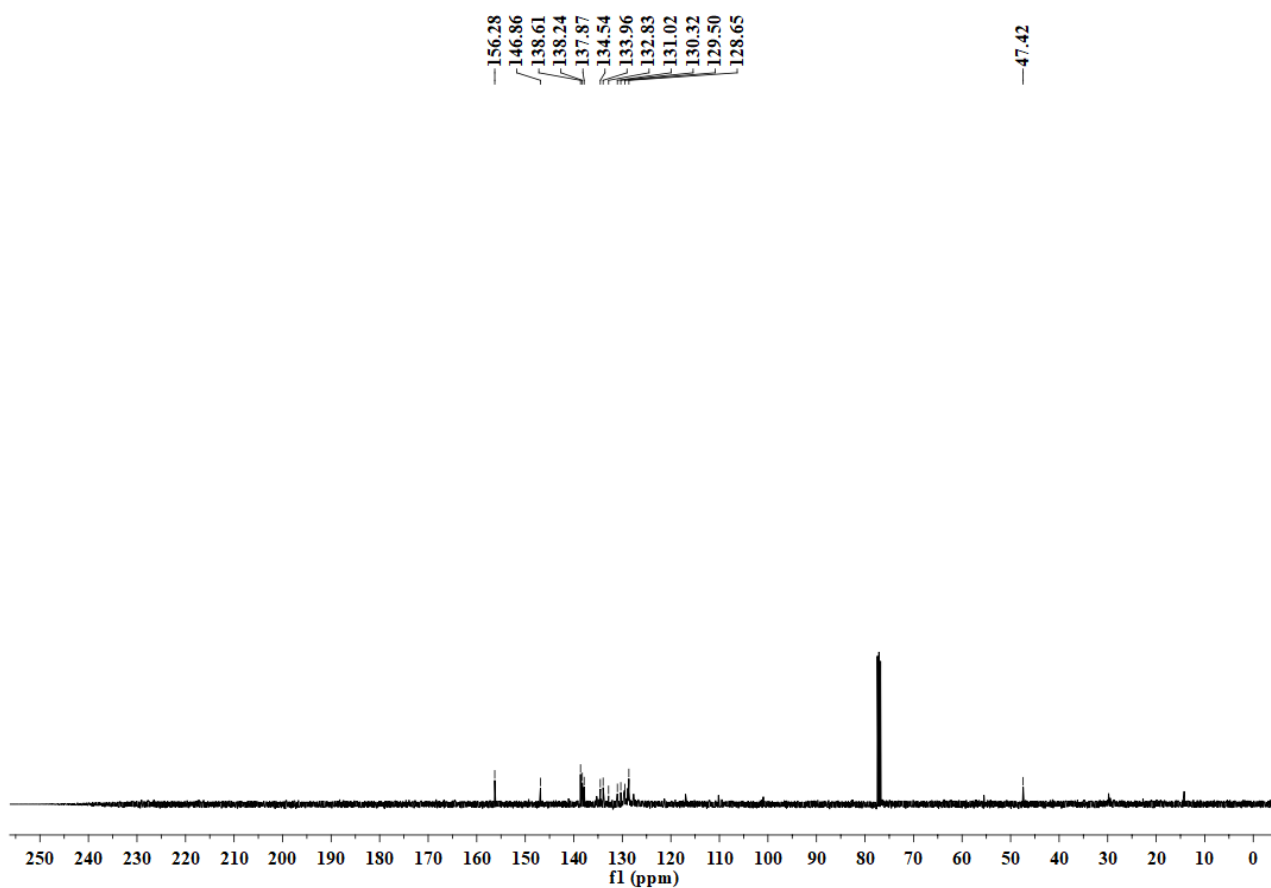

Figure. S34 <sup>13</sup>C NMR spectrum of **3ae** taking CDCl<sub>3</sub> as solvent.

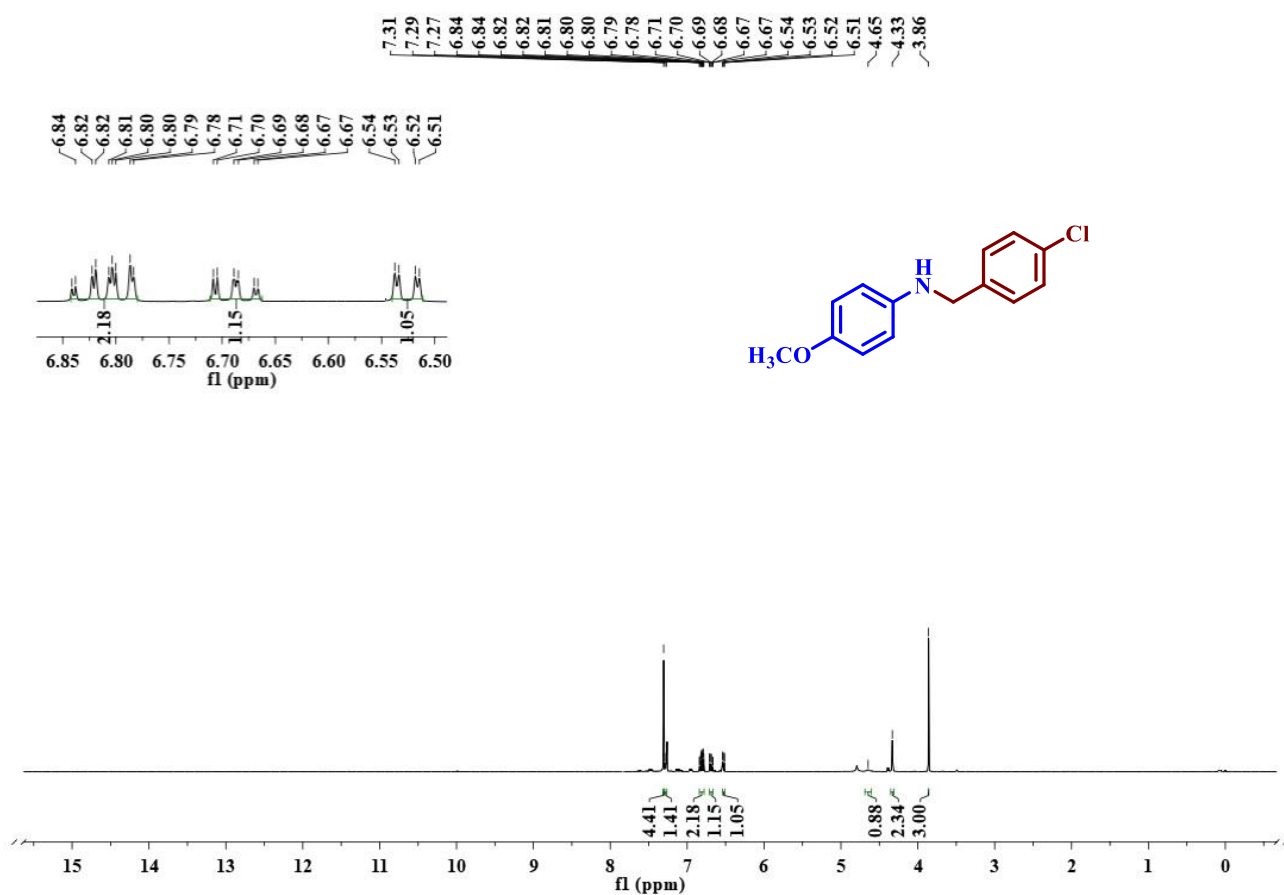

Figure S35. <sup>1</sup>H NMR spectrum of **3ba** taking CDCl<sub>3</sub> as solvent.

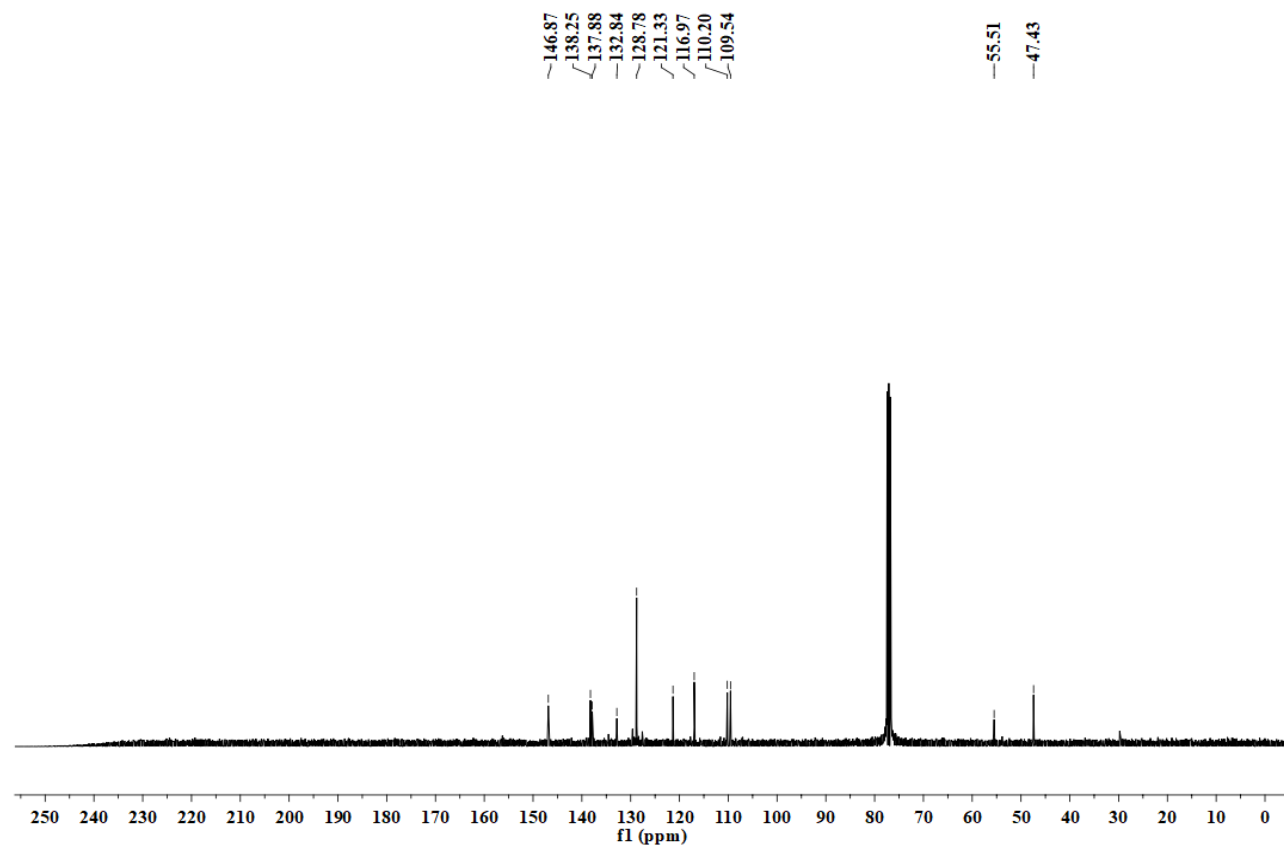

Figure S36. <sup>13</sup>C NMR spectrum of **3ba** taking CDCl<sub>3</sub> as solvent.

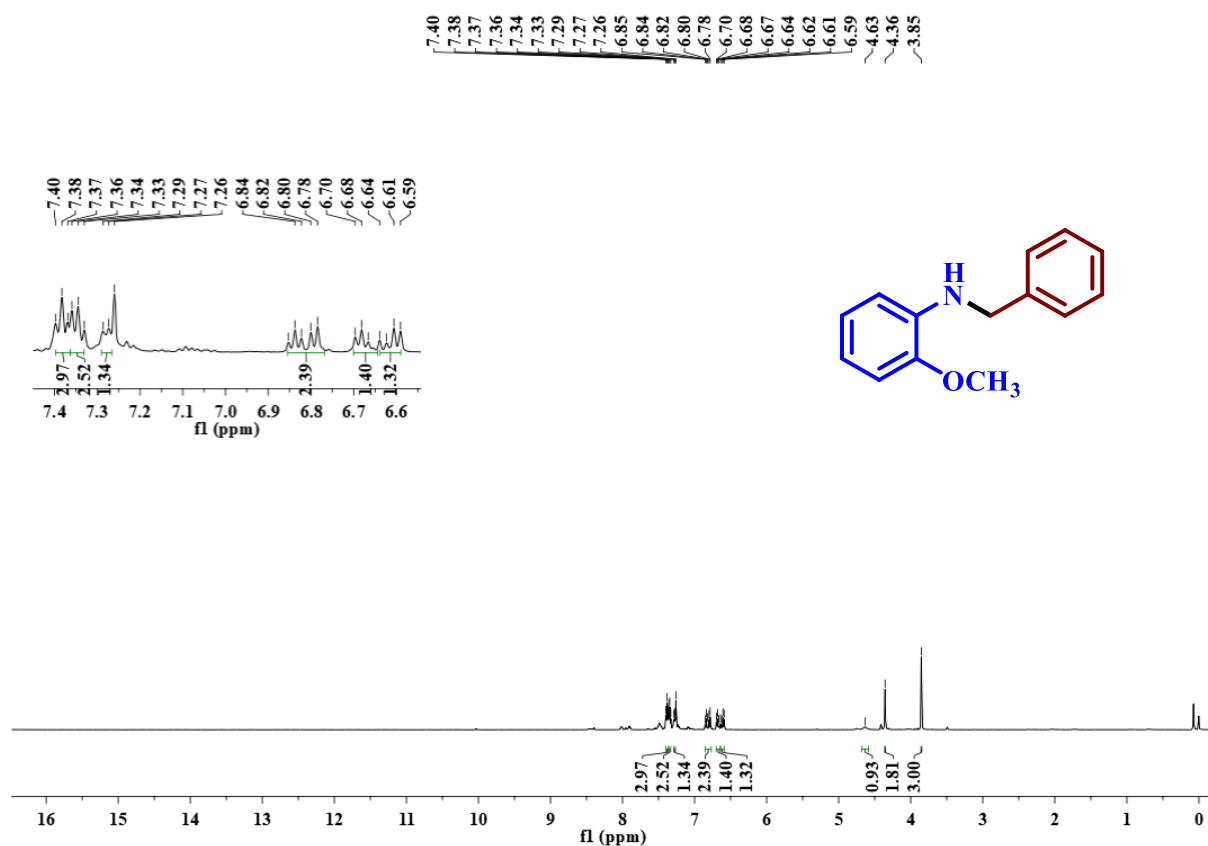

Figure S37. <sup>1</sup>H NMR spectrum of **3ca** taking CDCl<sub>3</sub> as solvent.

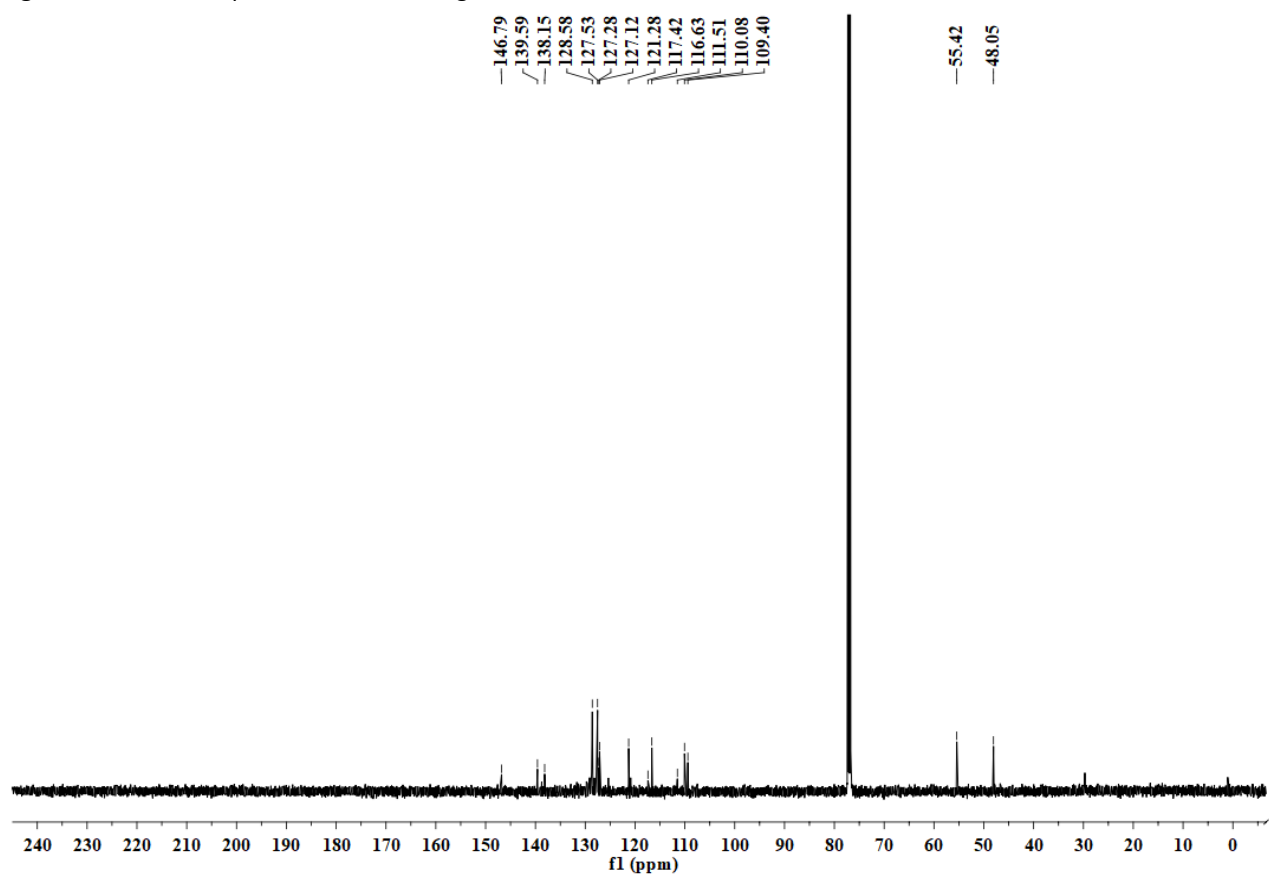

Figure S38. <sup>13</sup>C NMR spectrum of **3ca** taking CDCl<sub>3</sub> as solvent.

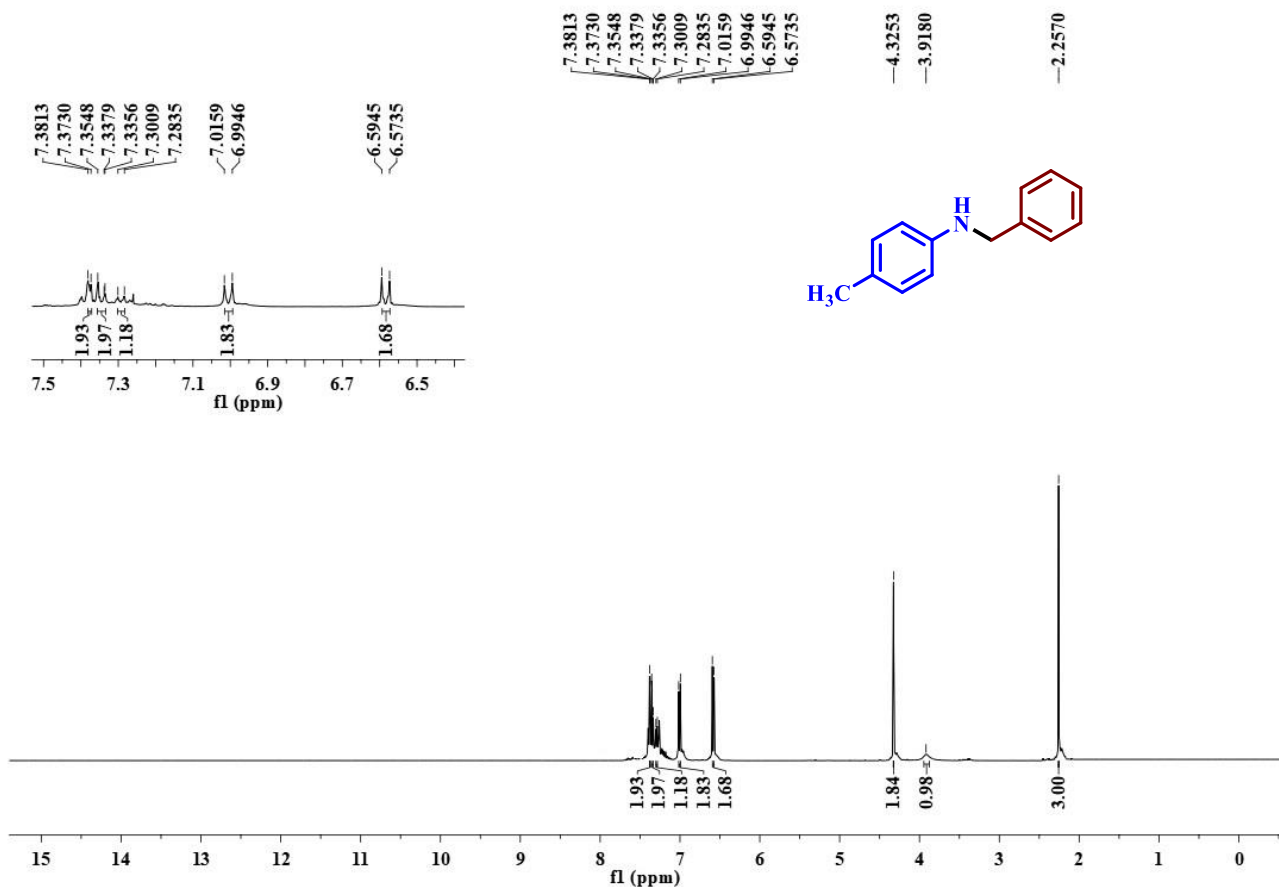

Figure S39. <sup>1</sup>H NMR spectrum of **3da** taking CDCl<sub>3</sub> as solvent.

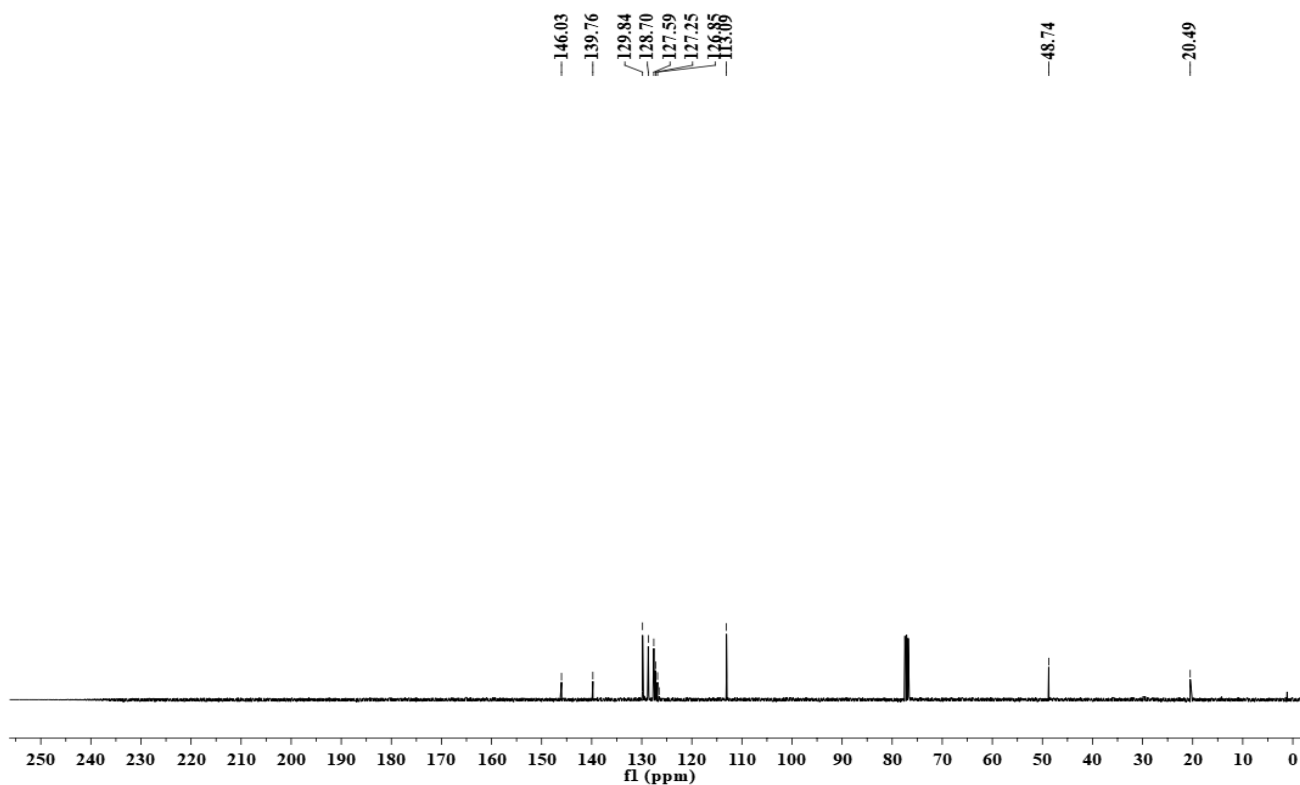

Figure S40. <sup>13</sup>C NMR spectrum of **3da** taking CDCl<sub>3</sub> as solvent.

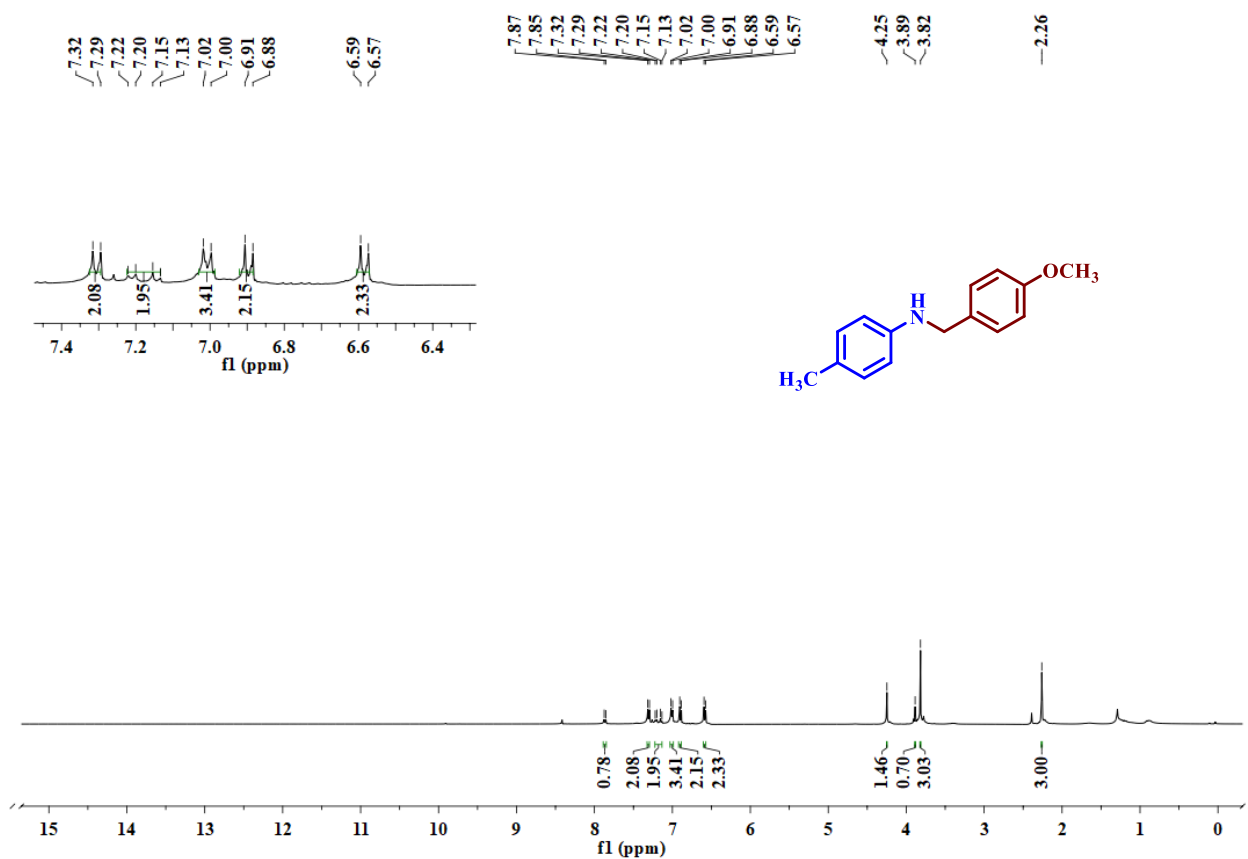

Figure S41. <sup>1</sup>H NMR spectrum of **3db** taking CDCl<sub>3</sub> as solvent.

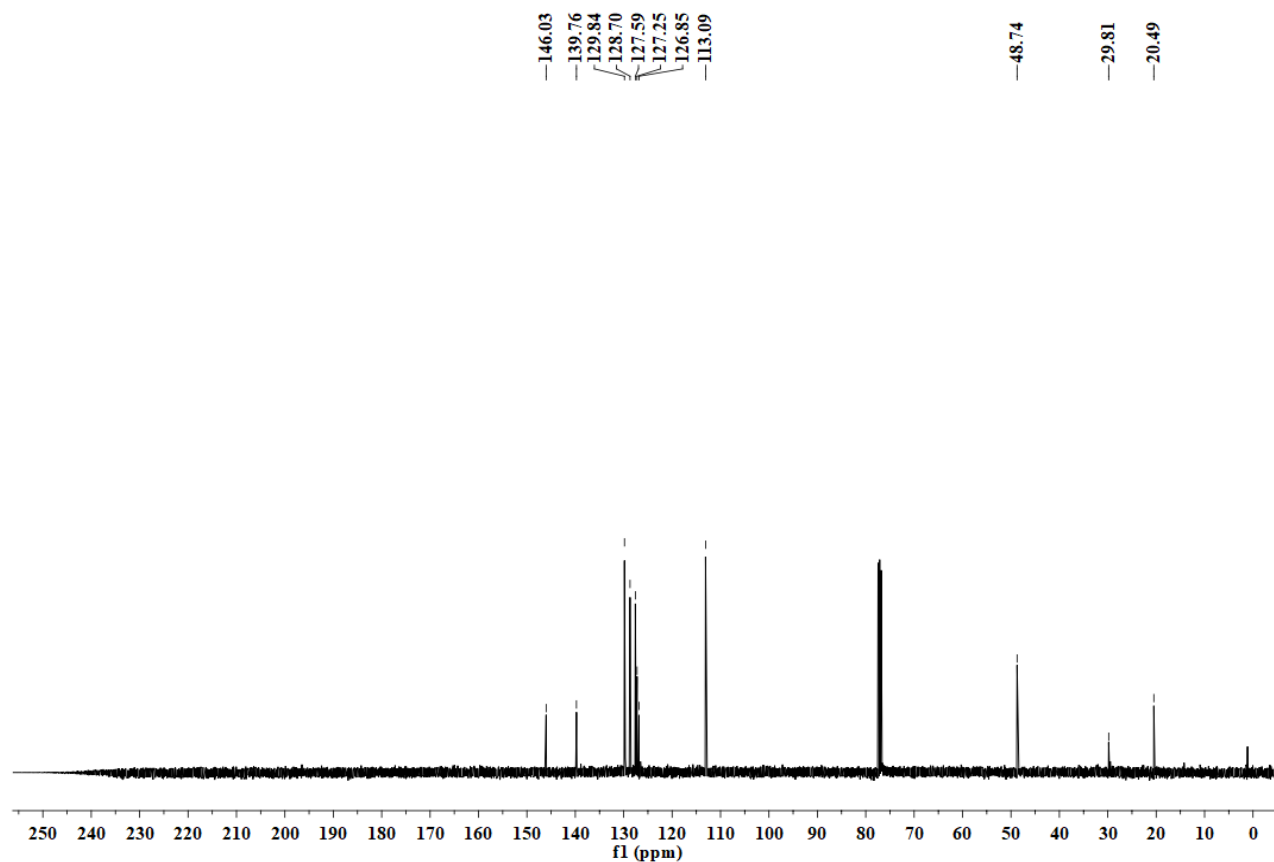

Figure S42. <sup>13</sup>C NMR spectrum of **3db** taking CDCl<sub>3</sub> as solvent.



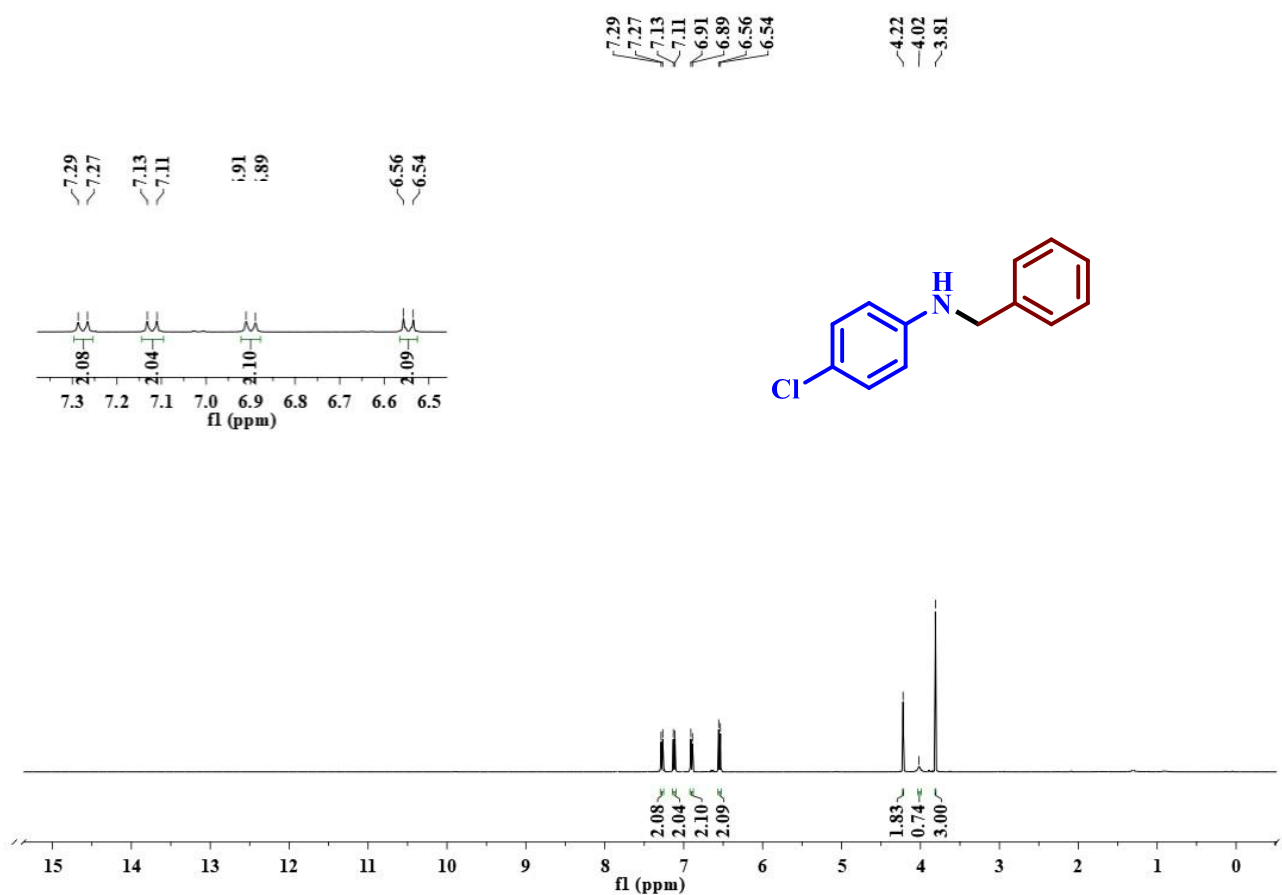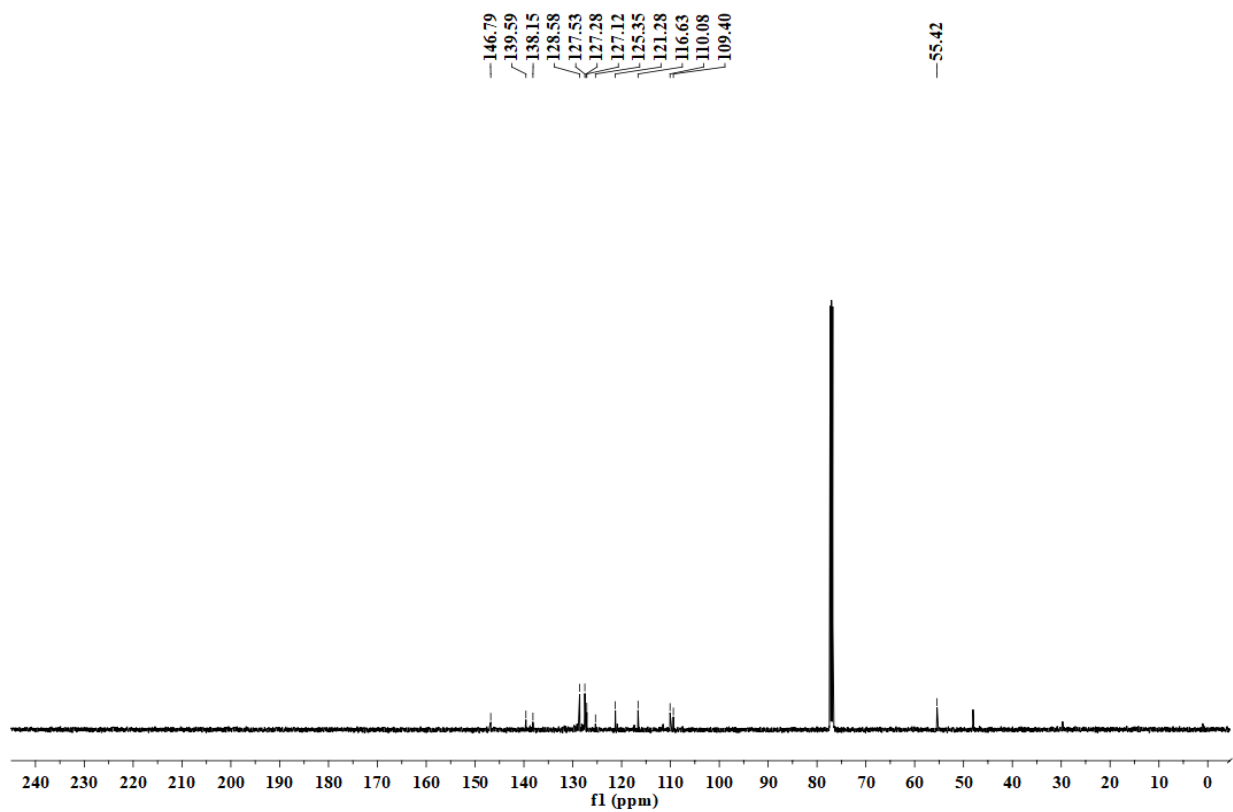

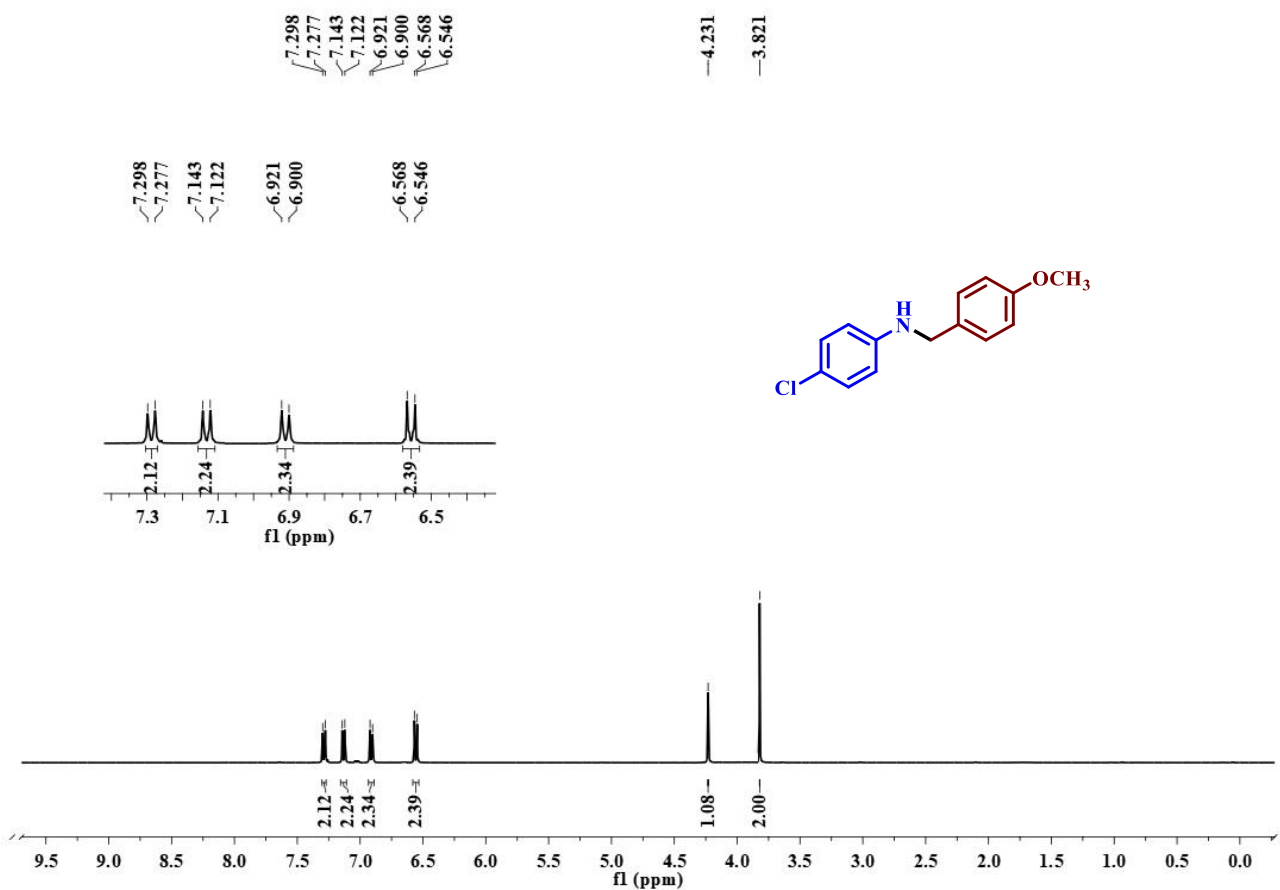

Figure S45. <sup>1</sup>H NMR spectrum of **3eb** taking CDCl<sub>3</sub> as solvent.

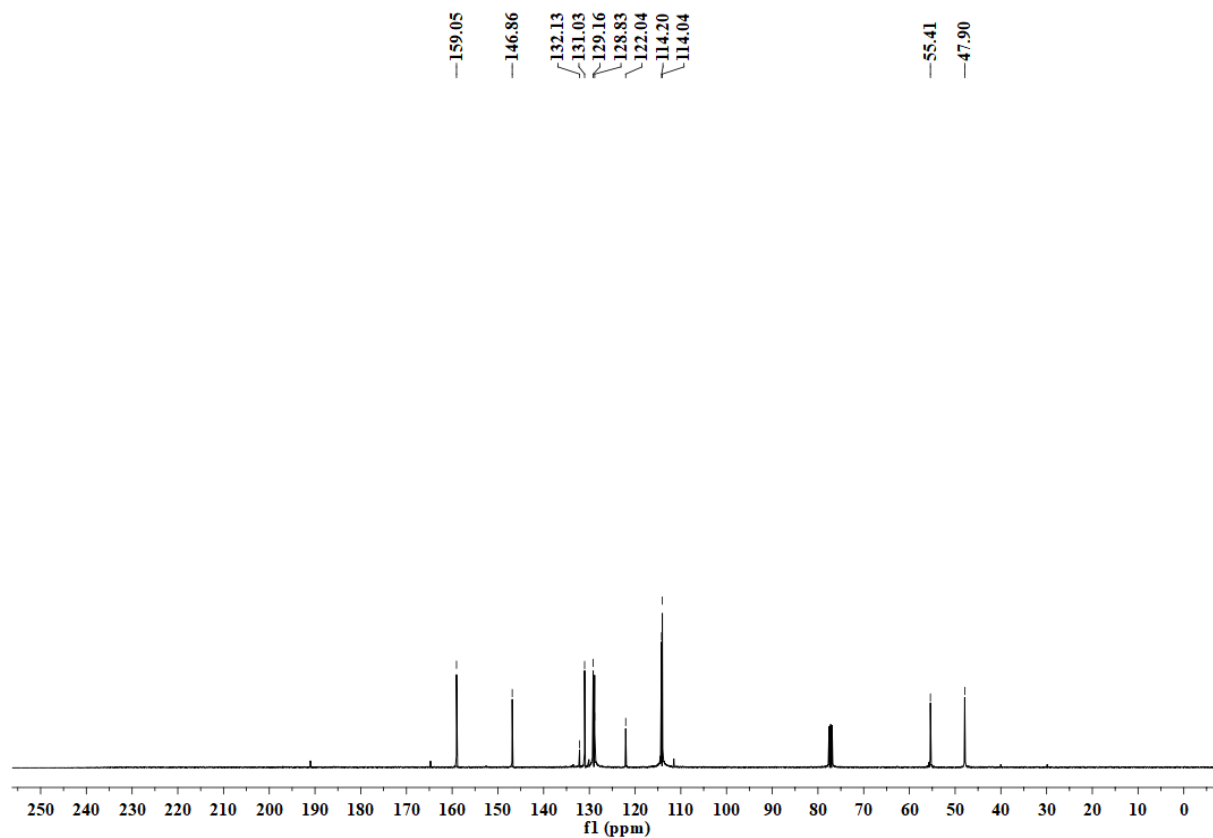

Figure S46. <sup>13</sup>C NMR spectrum of **3eb** taking CDCl<sub>3</sub> as solvent.

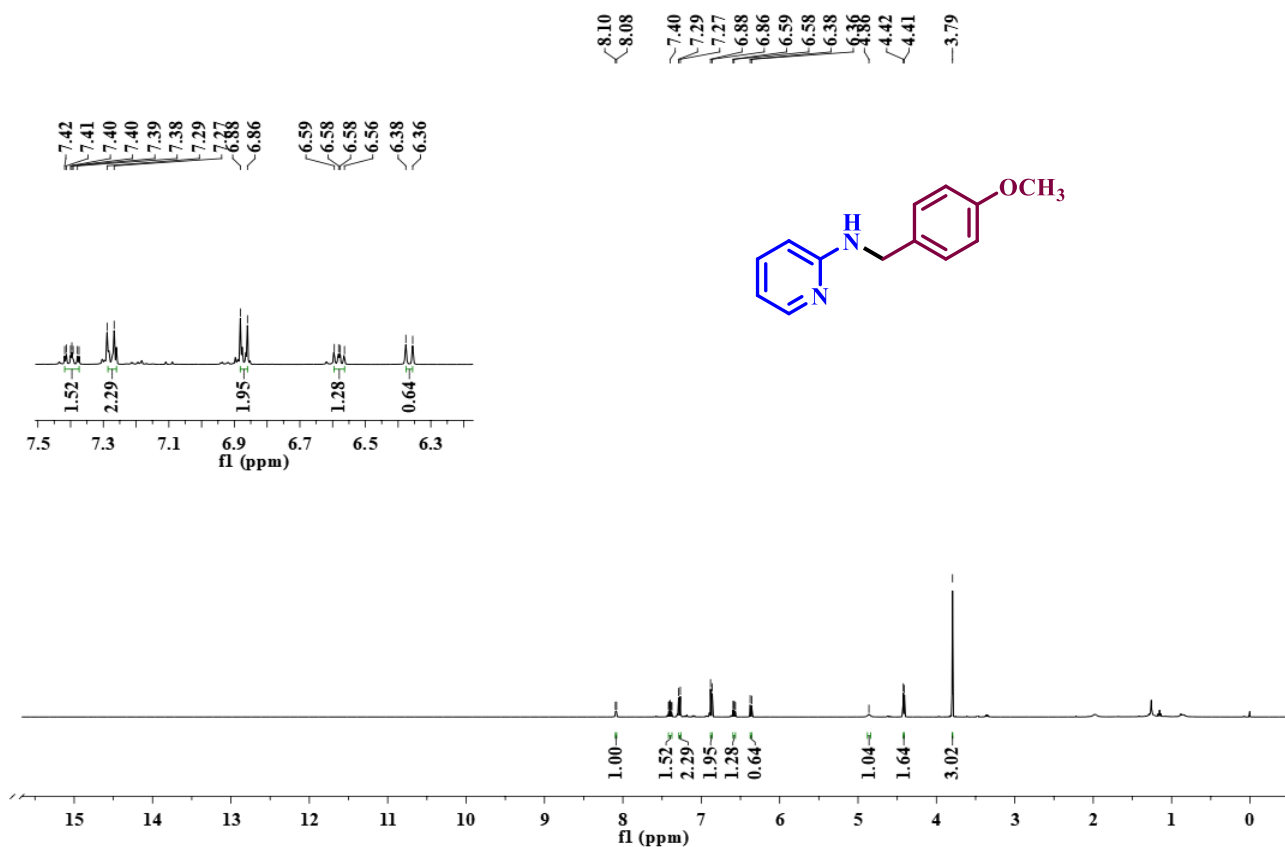

Figure S47. <sup>1</sup>H NMR spectrum of **3fa** taking CDCl<sub>3</sub> as solvent.

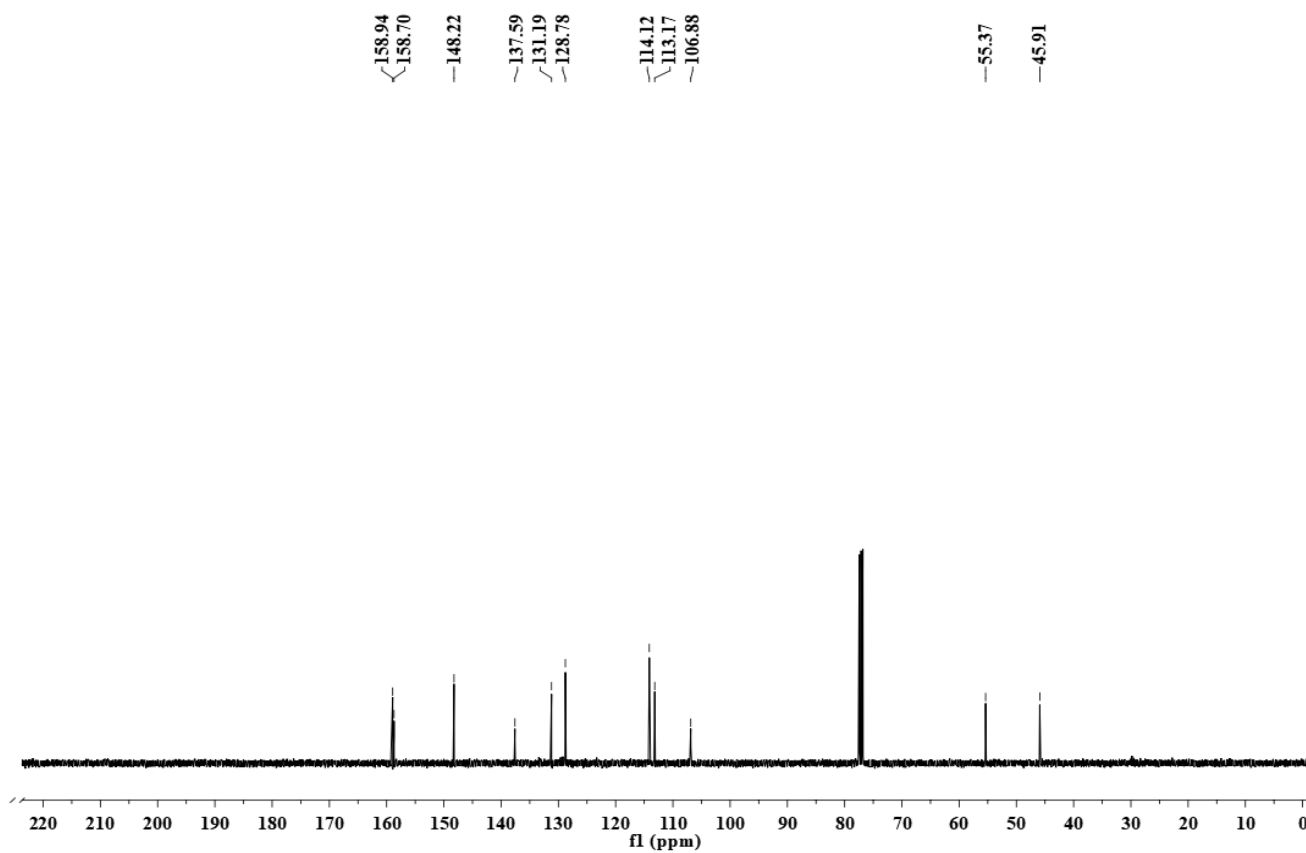

Figure S48. <sup>13</sup>C NMR spectrum of **3fa** taking CDCl<sub>3</sub> as solvent.

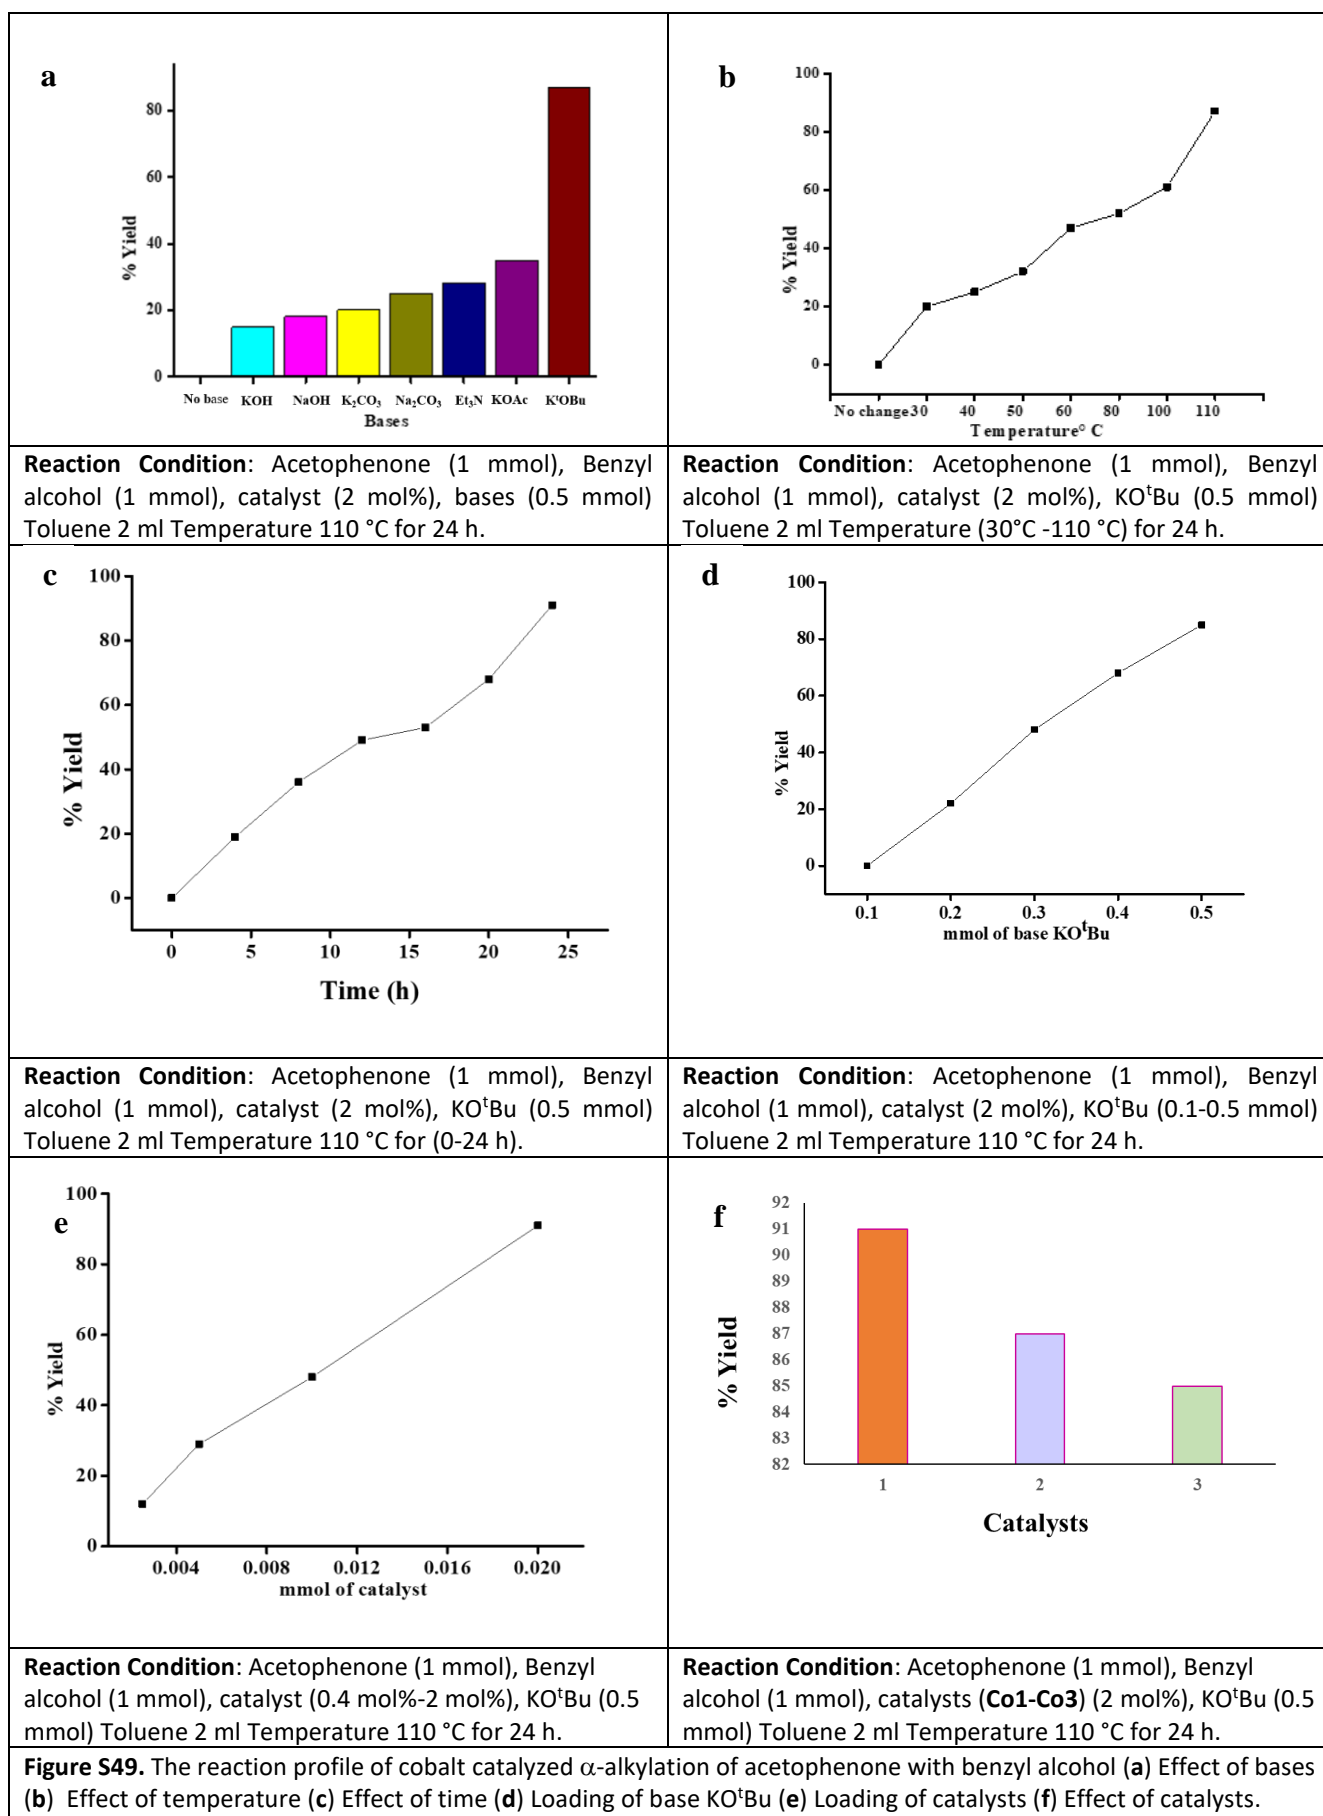

**Figure S49.** The reaction profile of cobalt catalyzed  $\alpha$ -alkylation of acetophenone with benzyl alcohol (a) Effect of bases (b) Effect of temperature (c) Effect of time (d) Loading of base KO<sup>t</sup>Bu (e) Loading of catalysts (f) Effect of catalysts.

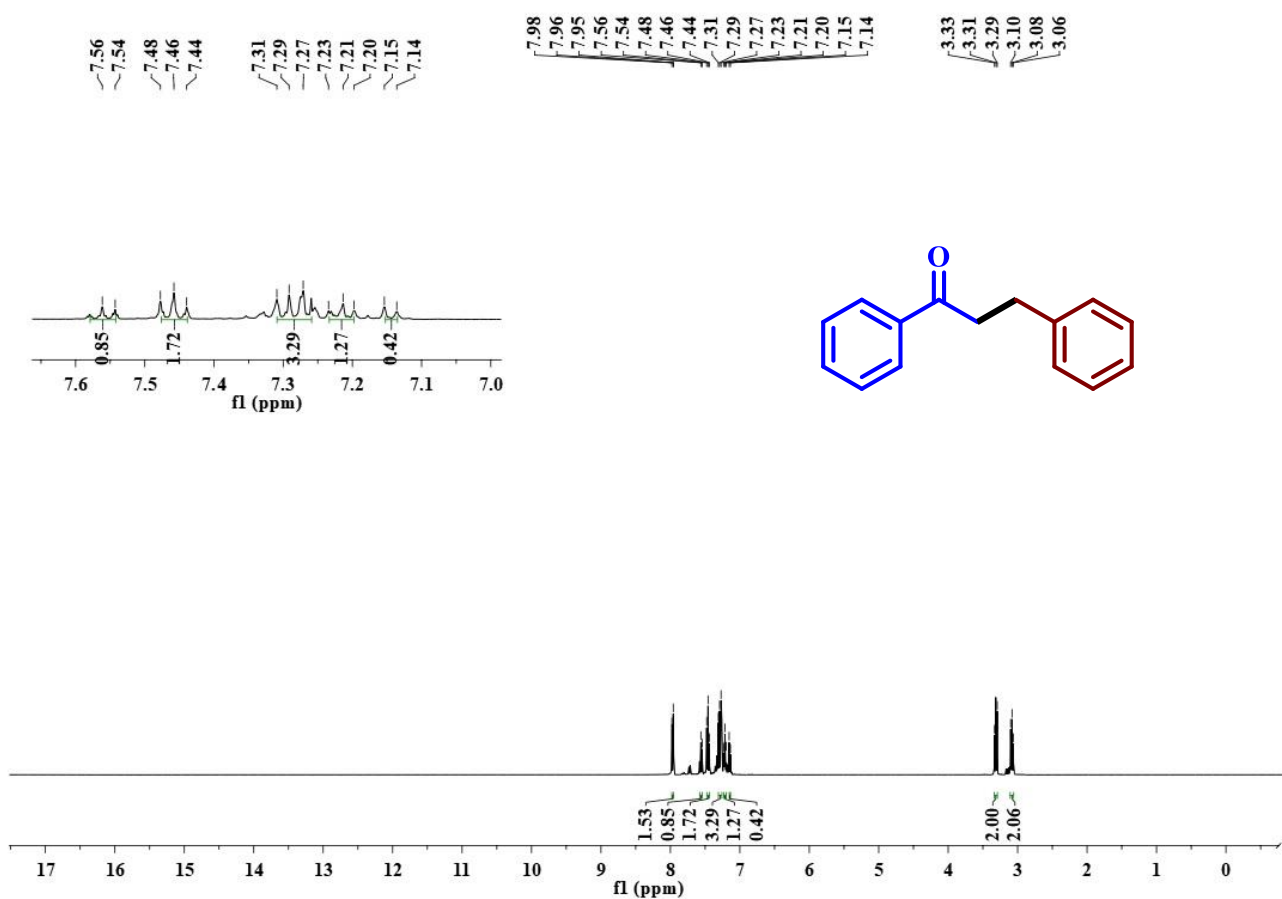

**Figure S50.** <sup>1</sup>H NMR spectrum of **5aa** taking CDCl<sub>3</sub> as solvent.

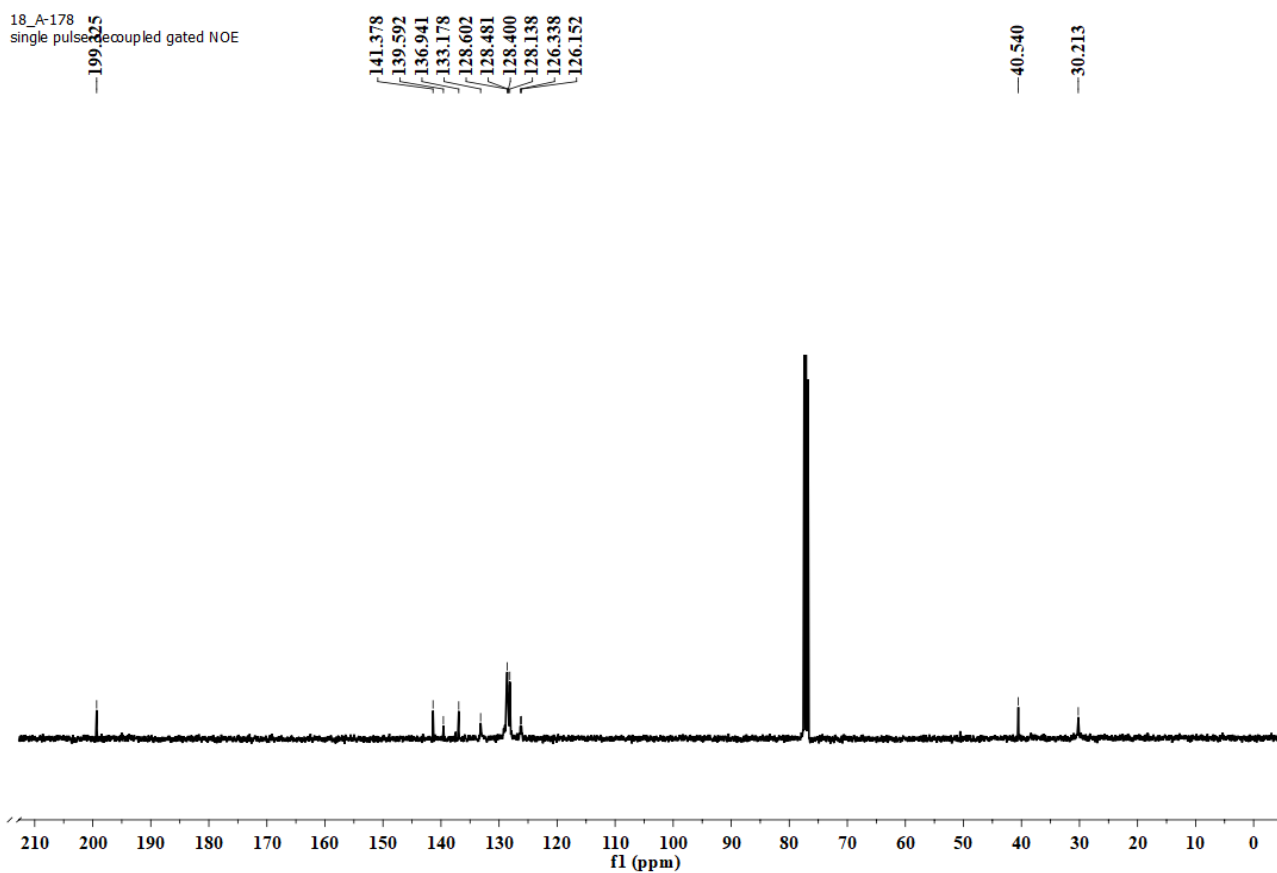

**Figure S51.** <sup>13</sup>C NMR spectrum of **5aa** taking CDCl<sub>3</sub> as solvent.

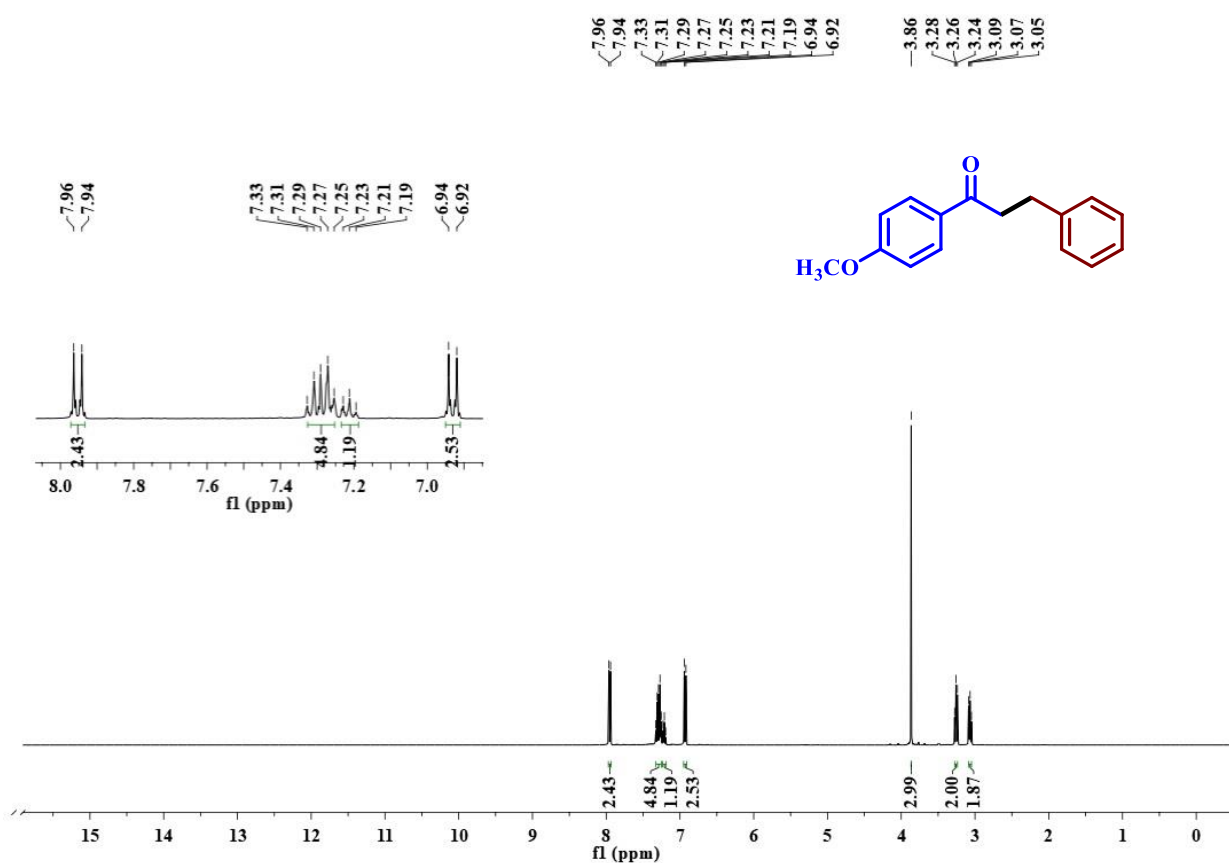

Figure S52. <sup>1</sup>H NMR spectrum of **5ab** taking CDCl<sub>3</sub> as solvent.

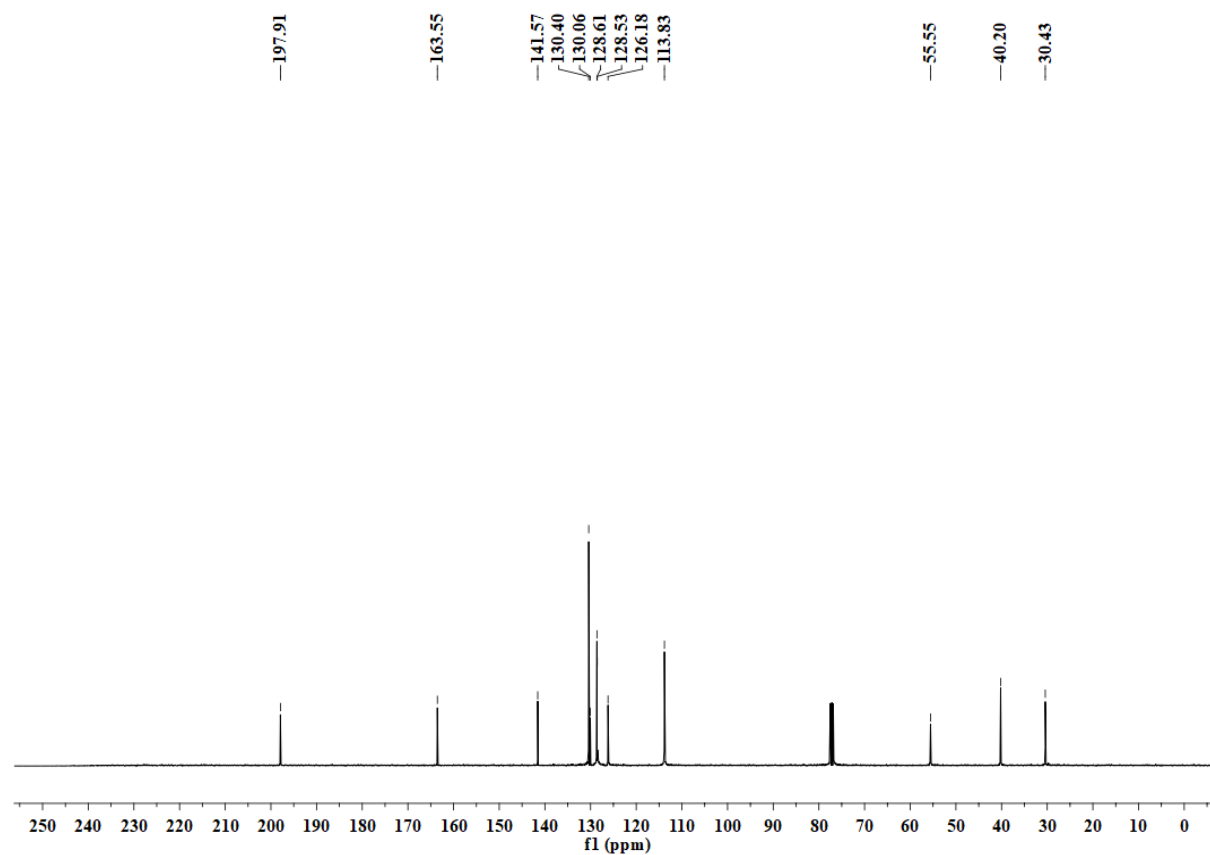

Figure S53. <sup>13</sup>C NMR spectrum of **5ab** taking CDCl<sub>3</sub> as solvent.

pmeacph+ba  
A-170

7.891  
7.875  
7.334  
7.319  
7.305  
7.281  
7.276  
7.239  
7.224  
7.210

3.311  
3.296  
3.280  
3.099  
3.083  
3.068  
2.425

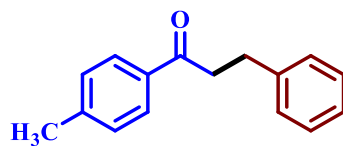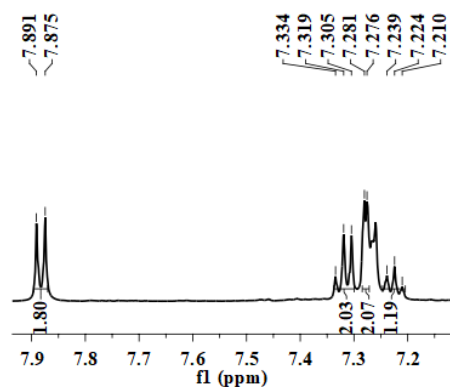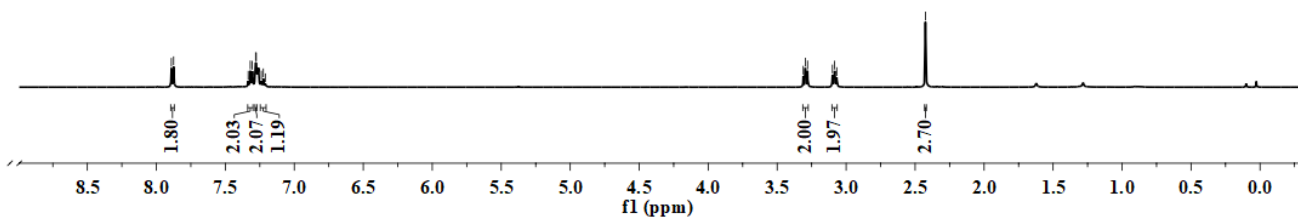

Figure S54.  $^1\text{H}$  NMR spectrum of **5ac** taking  $\text{CDCl}_3$  as solvent.

16\_NS-176  
single pulse decoupled gated NOE

198.896

143.920  
141.494  
134.485  
129.373  
128.602  
128.516  
128.258  
126.185

40.434

30.310

21.724

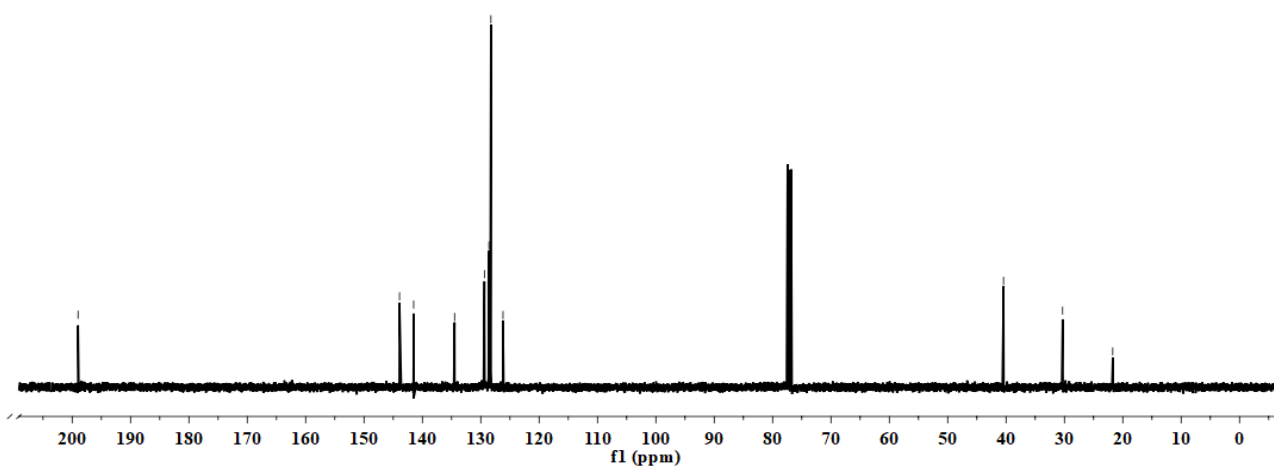

Figure S55.  $^{13}\text{C}$  NMR spectrum of **5ac** taking  $\text{CDCl}_3$  as solvent.

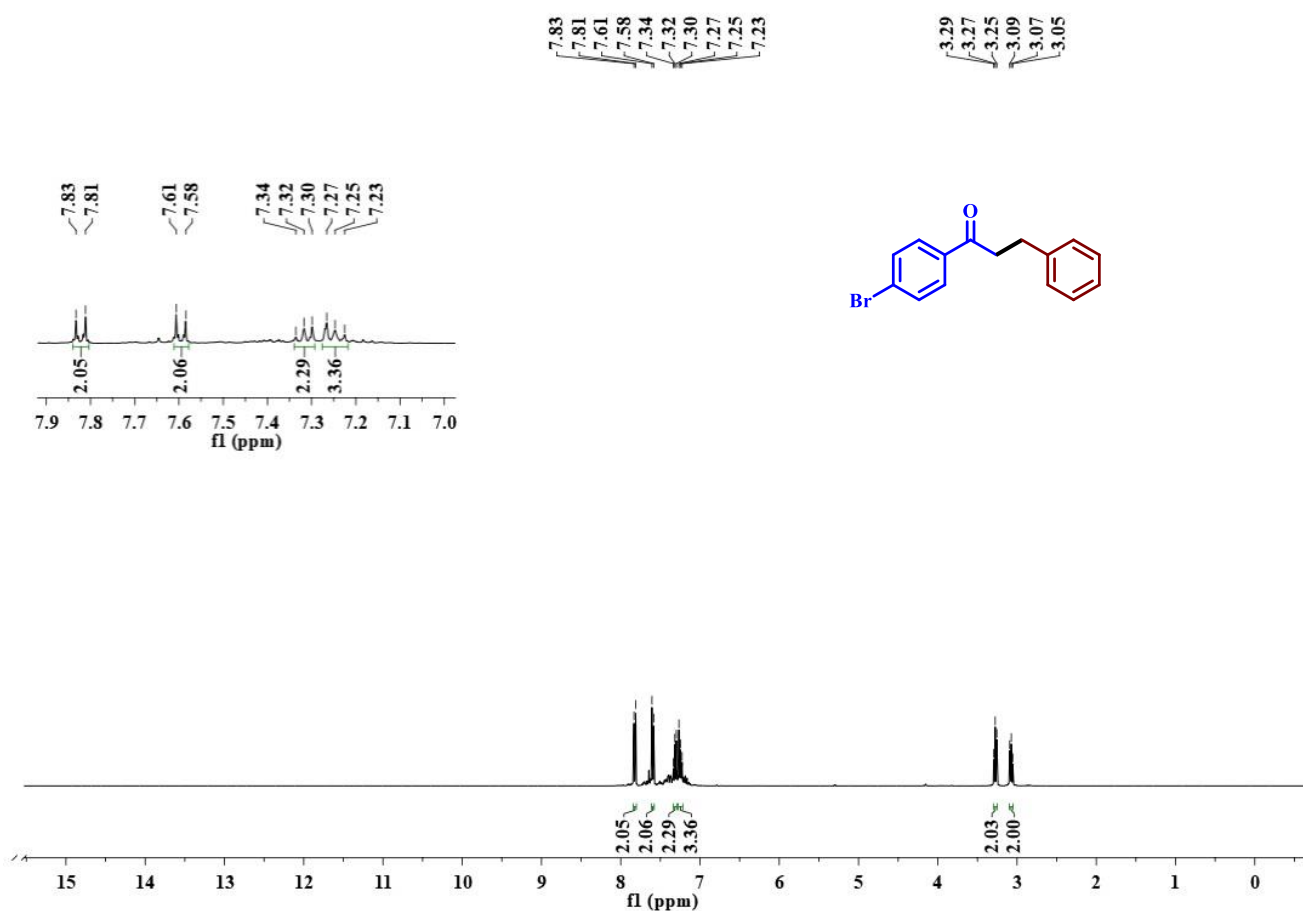

Figure S56. <sup>1</sup>H NMR spectrum of **5ad** taking CDCl<sub>3</sub> as solvent.

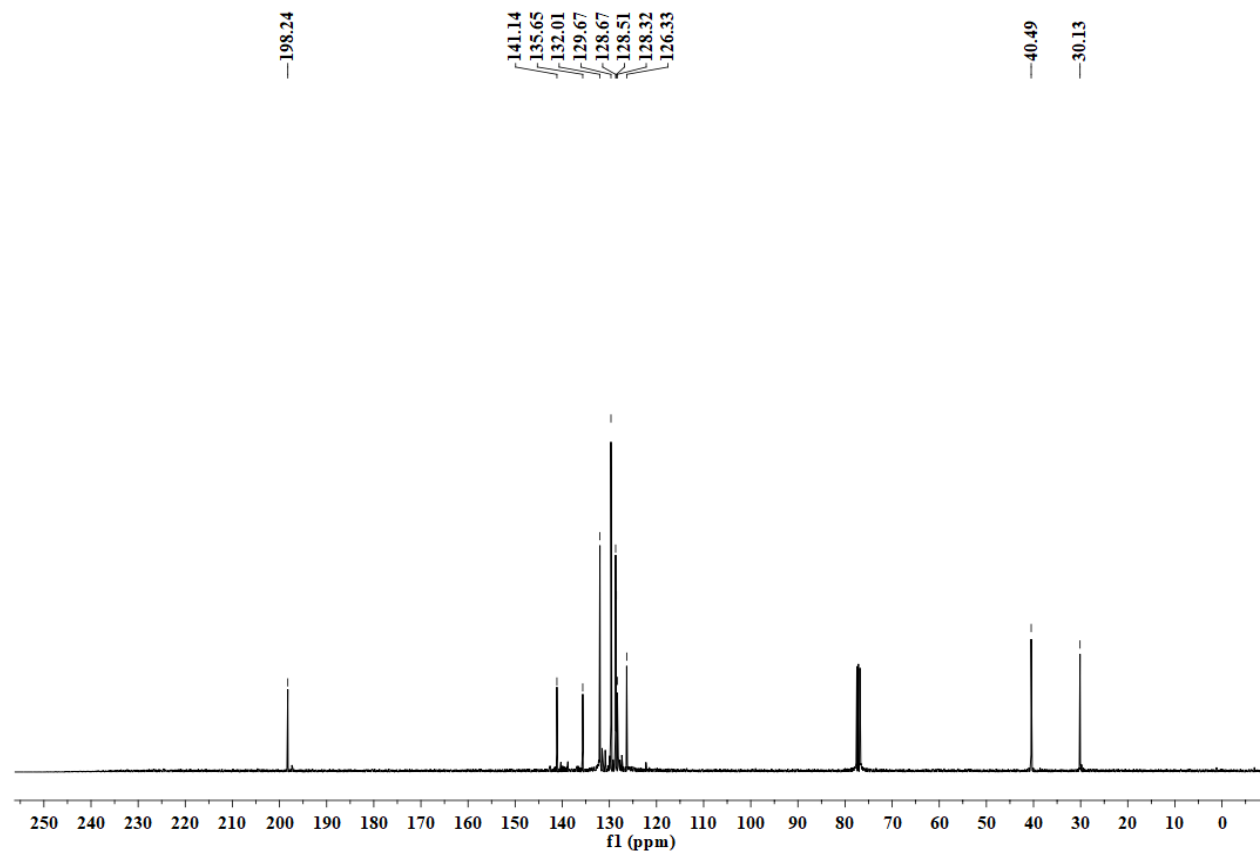

Figure S57. <sup>13</sup>C NMR spectrum of **5ad** taking CDCl<sub>3</sub> as solvent.



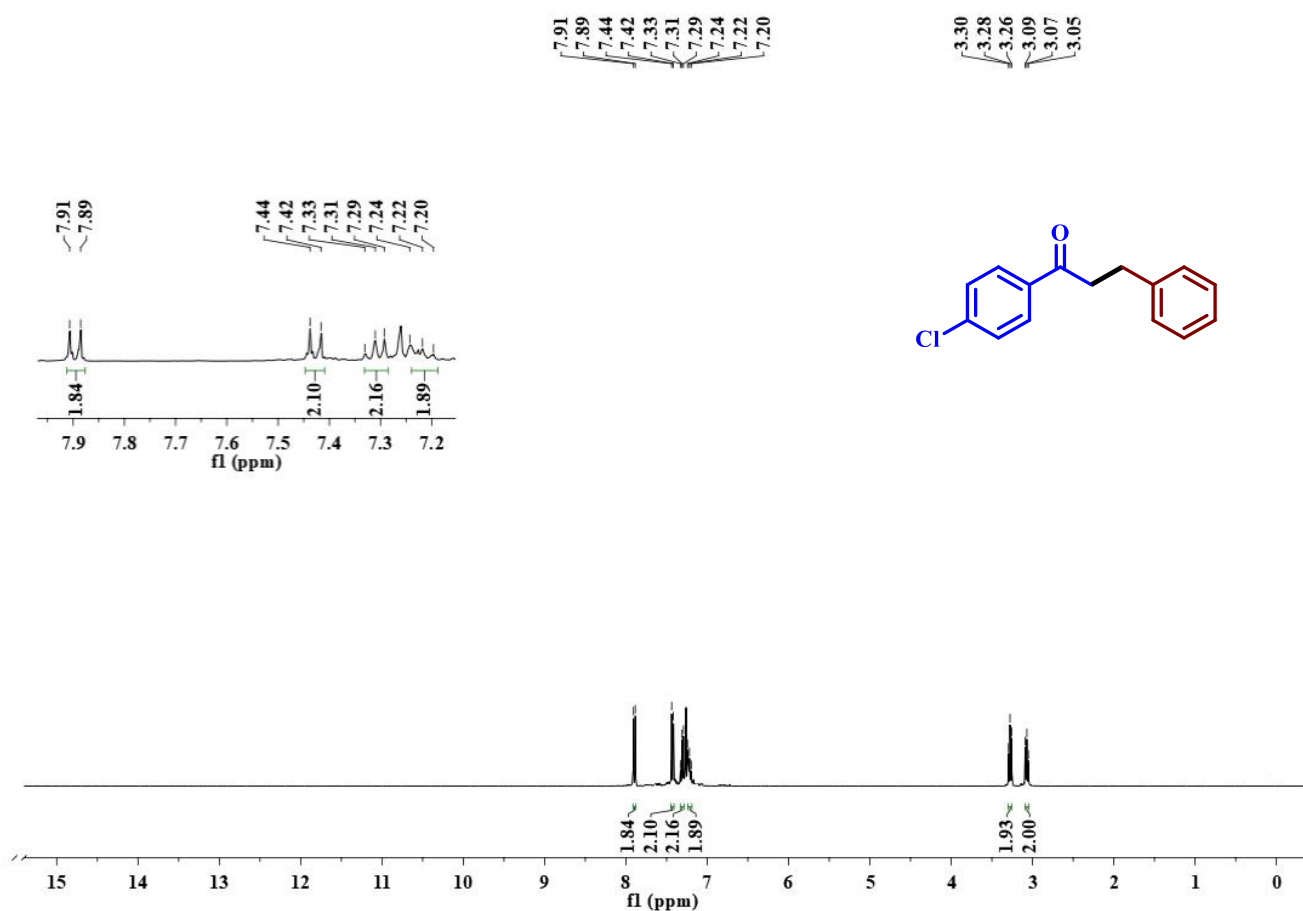

Figure S58. <sup>1</sup>H NMR spectrum of 5ae taking CDCl<sub>3</sub> as solvent.

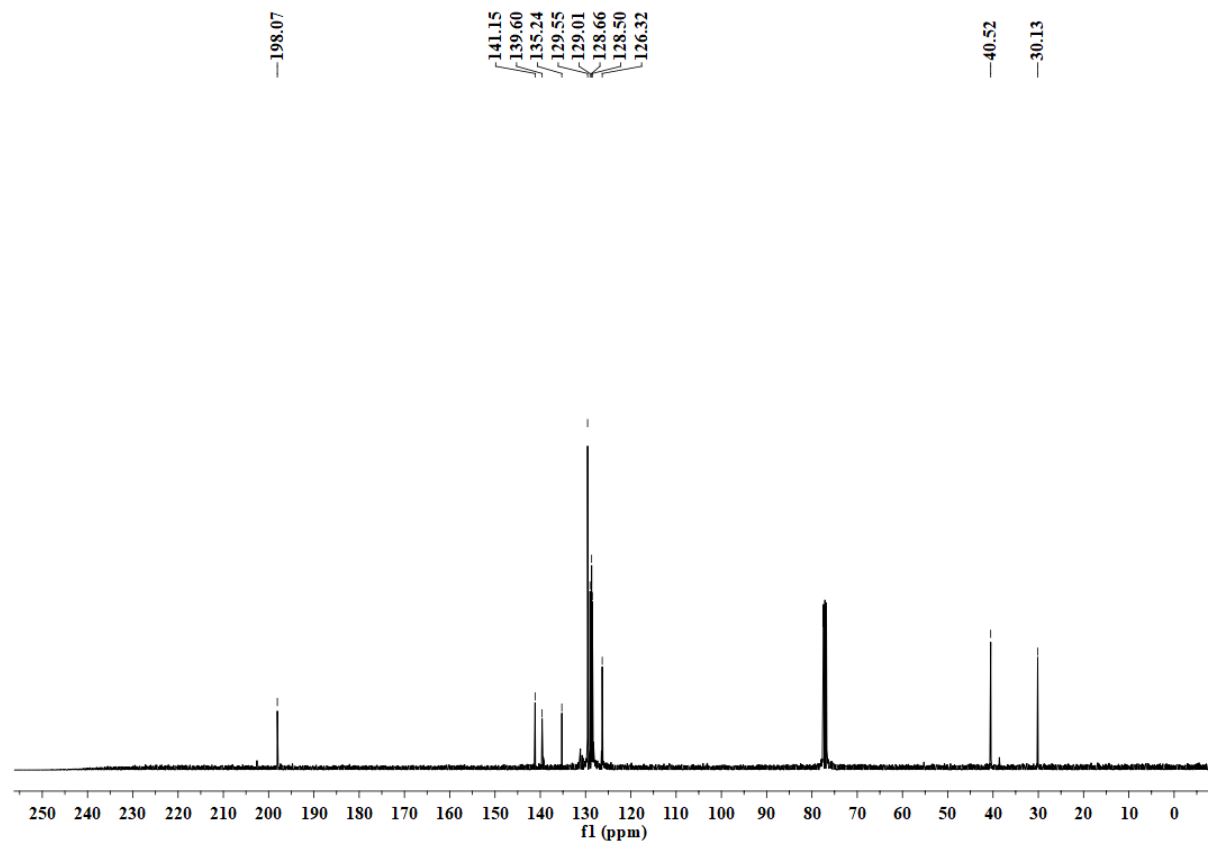

Figure S59. <sup>13</sup>C NMR spectrum of 5ae taking CDCl<sub>3</sub> as solvent.

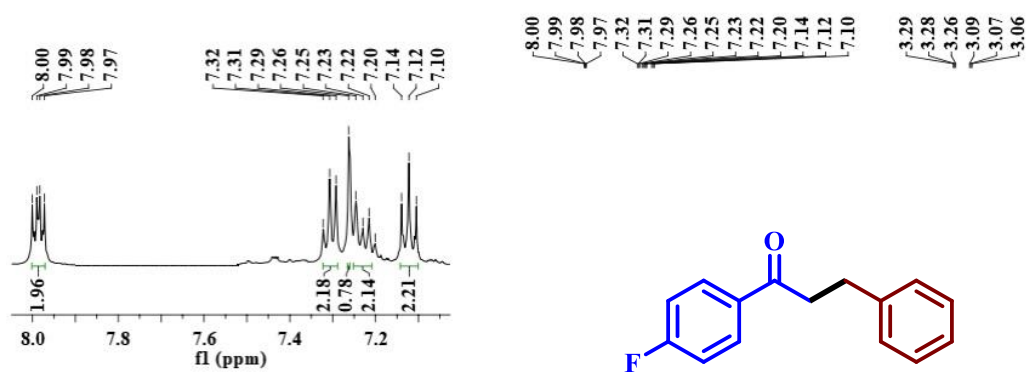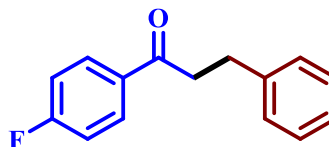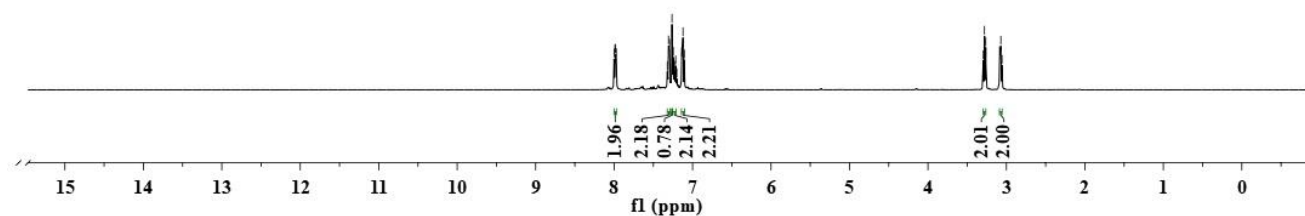

Figure S60. <sup>1</sup>H NMR spectrum of **5af** taking CDCl<sub>3</sub> as solvent.

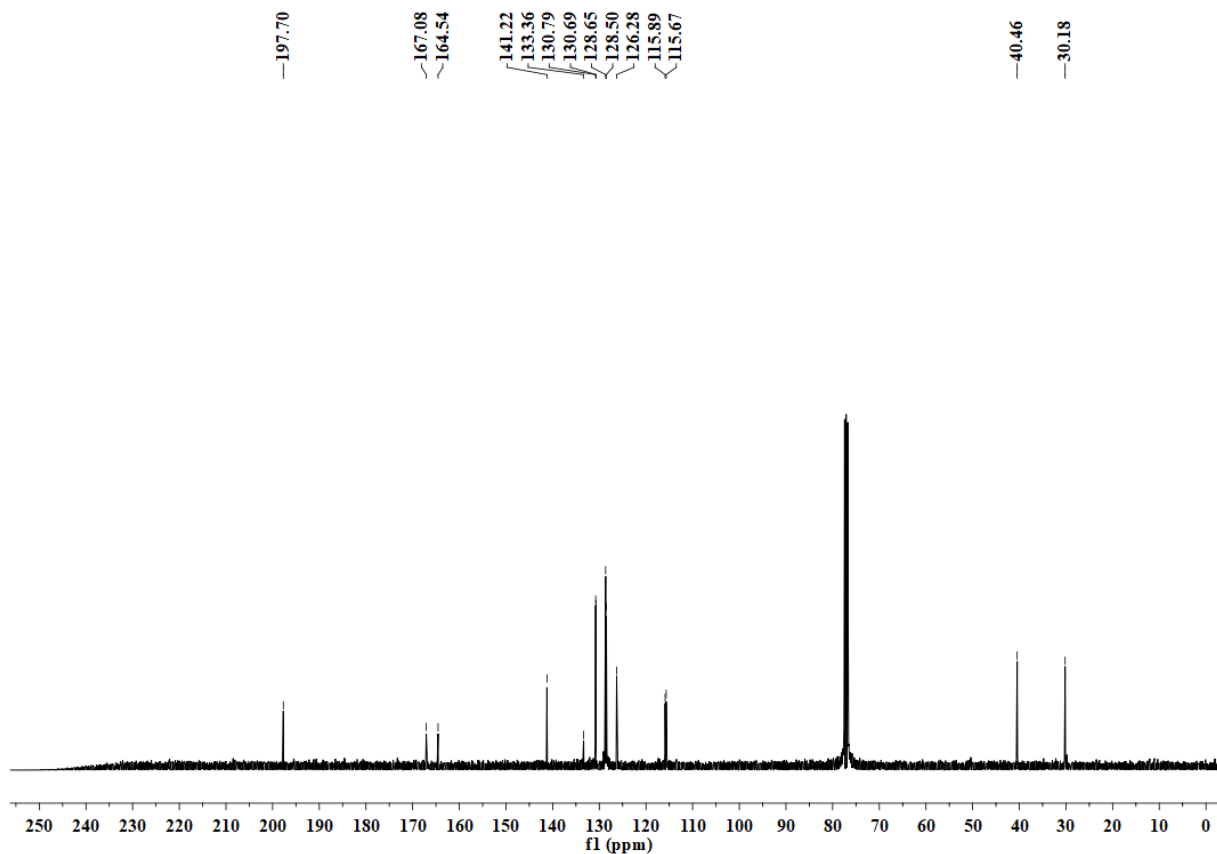

Figure S61. <sup>13</sup>C NMR spectrum of **5af** taking CDCl<sub>3</sub> as solvent.

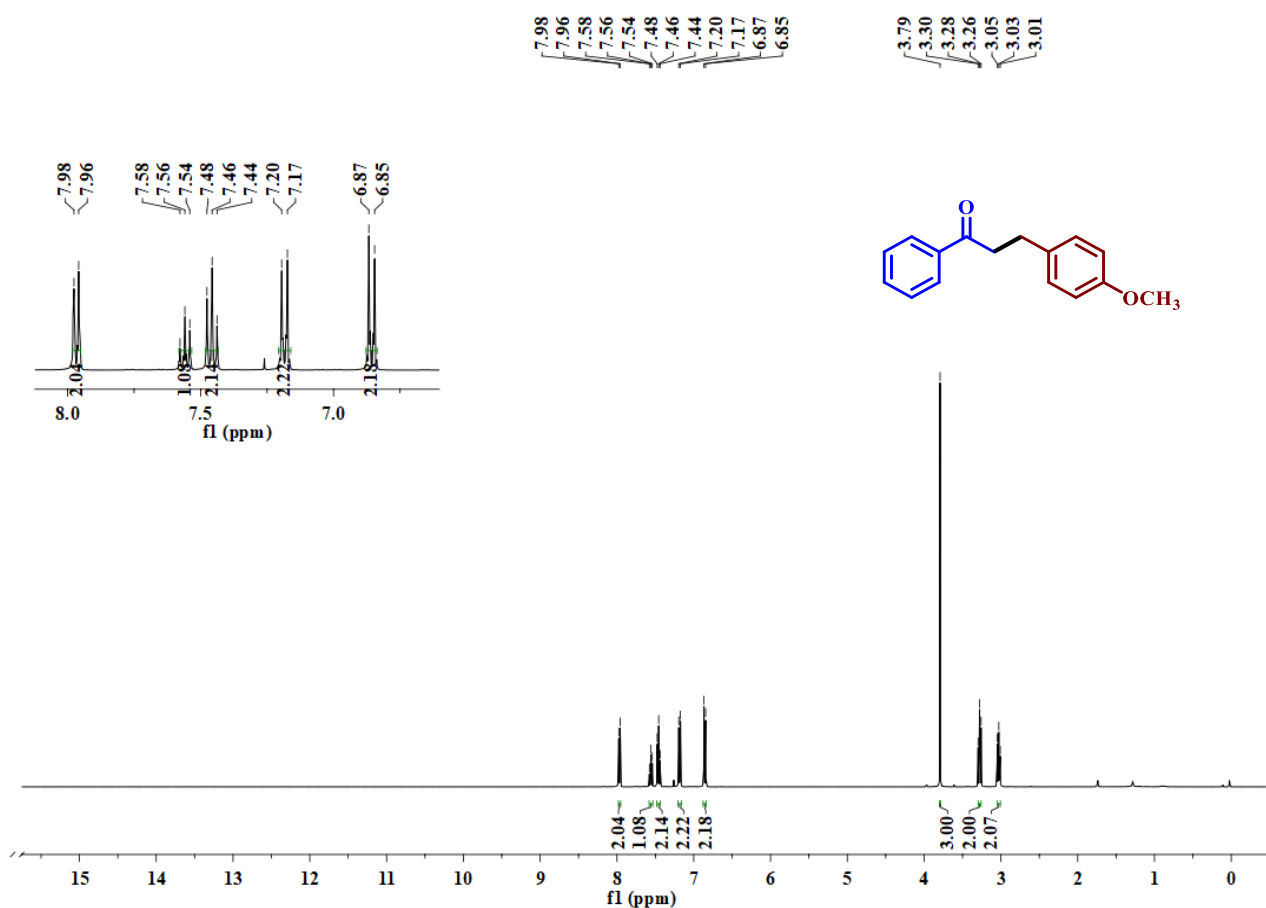

Figure S62. <sup>1</sup>H NMR spectrum of **5ba** taking CDCl<sub>3</sub> as solvent.

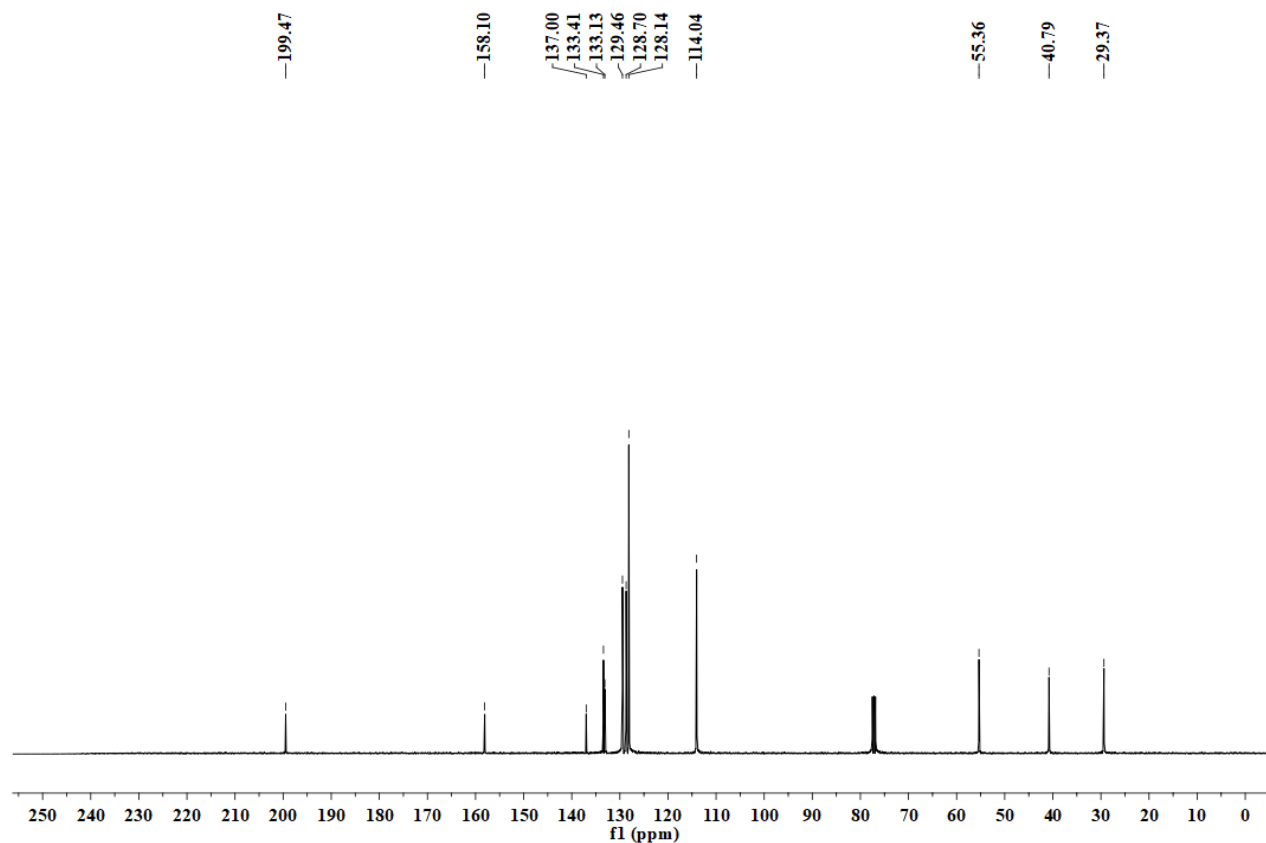

Figure S63. <sup>13</sup>C NMR spectrum of **5ba** taking CDCl<sub>3</sub> as solvent.

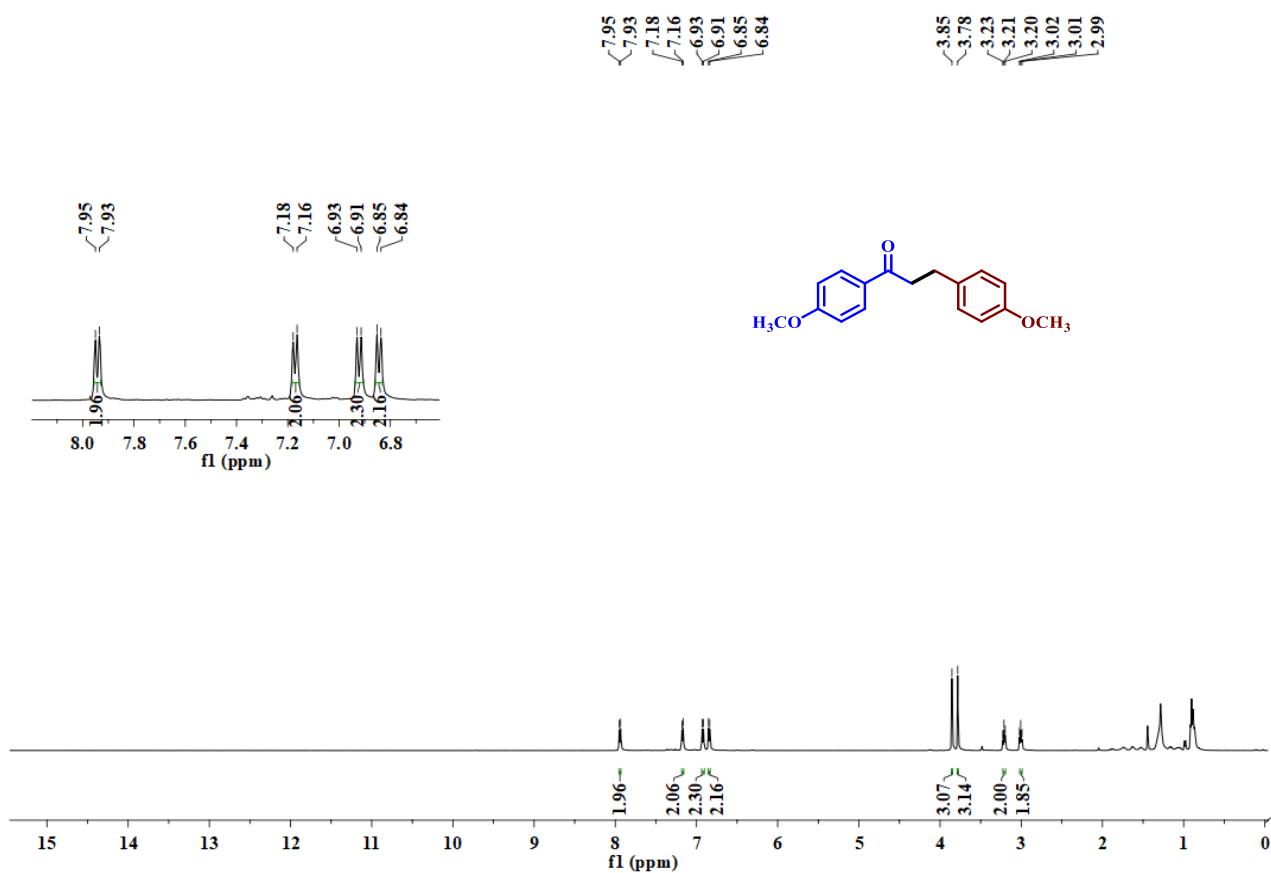

Figure S64. <sup>1</sup>H NMR spectrum of **5bb** taking CDCl<sub>3</sub> as solvent.

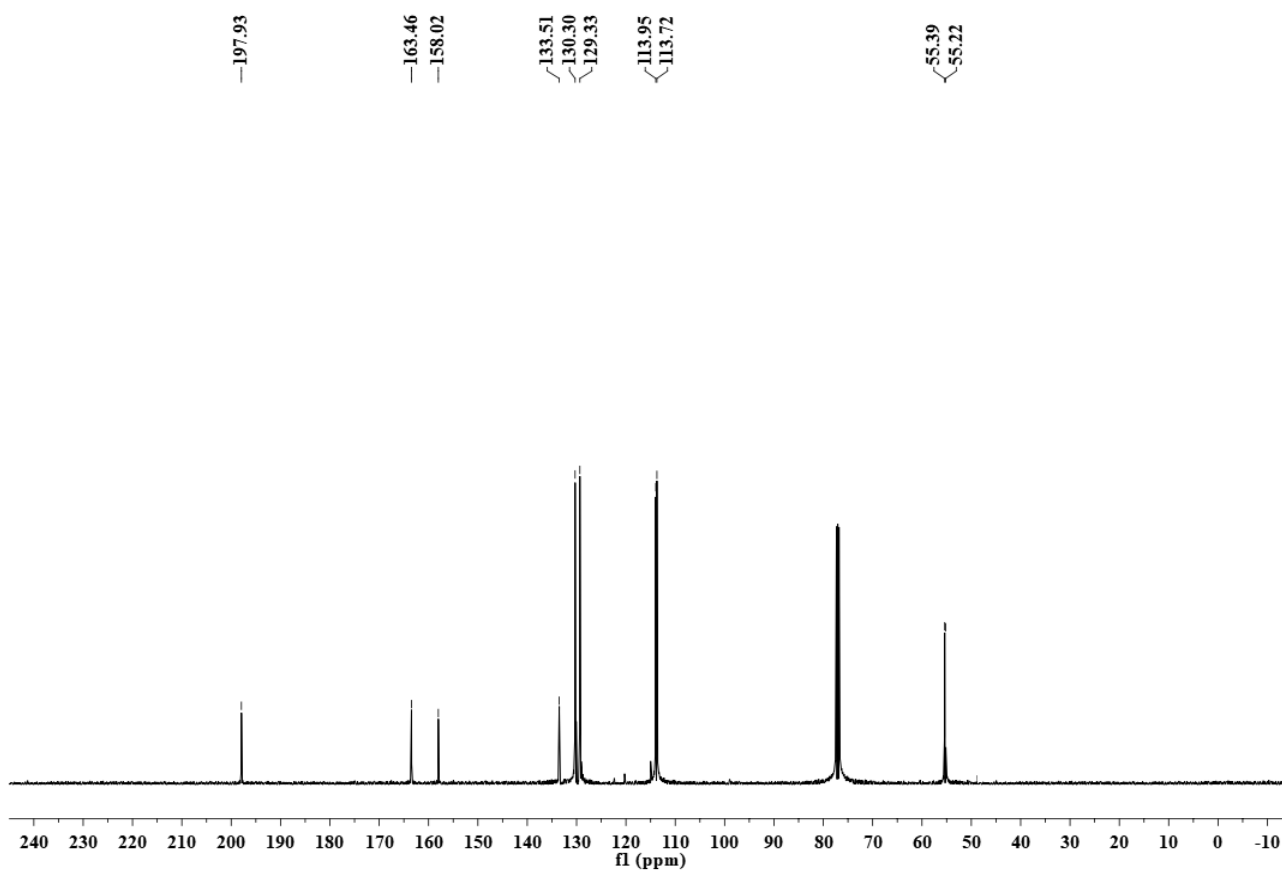

Figure S65. <sup>13</sup>C NMR spectrum of **5bb** taking CDCl<sub>3</sub> as solvent.

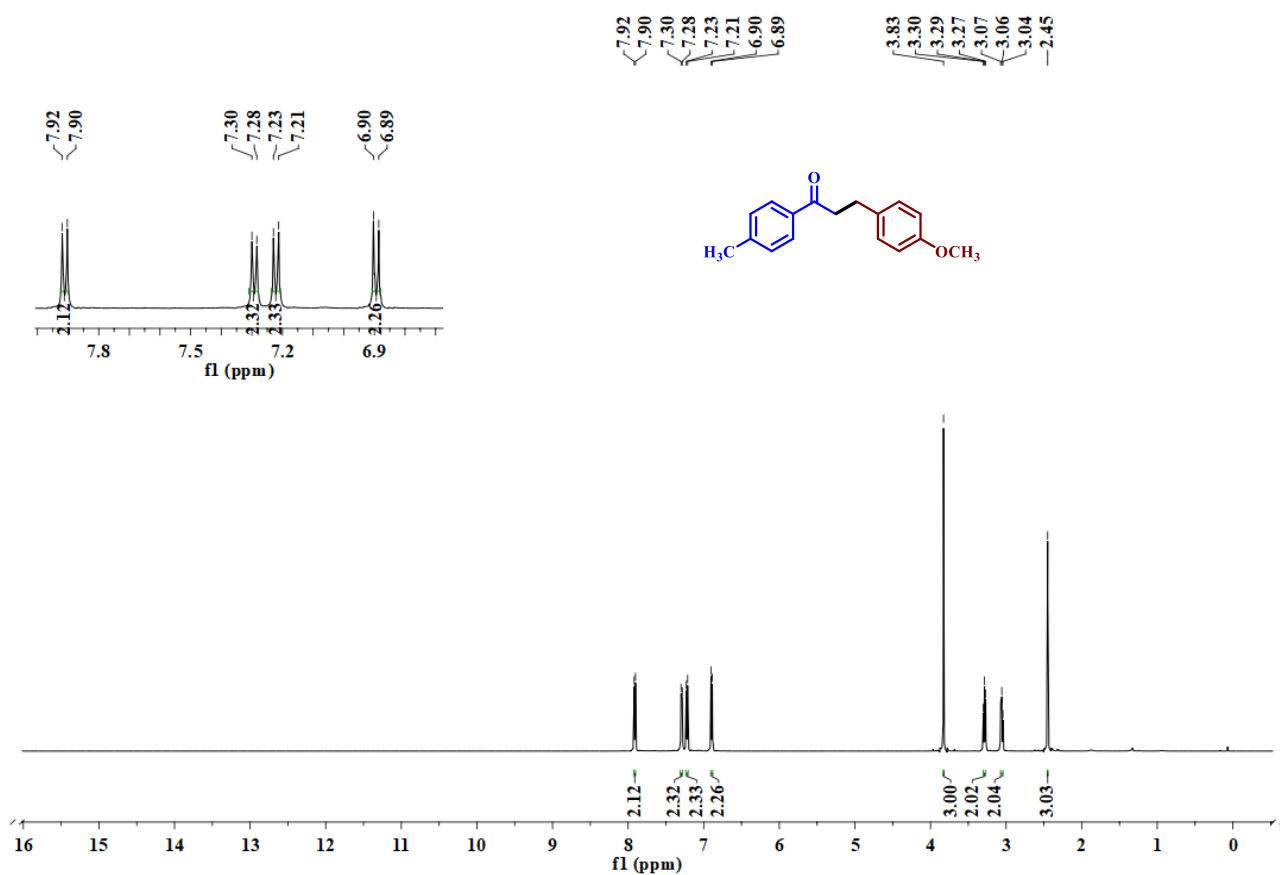

Figure S66. <sup>1</sup>H NMR spectrum of **5bc** taking CDCl<sub>3</sub> as solvent.

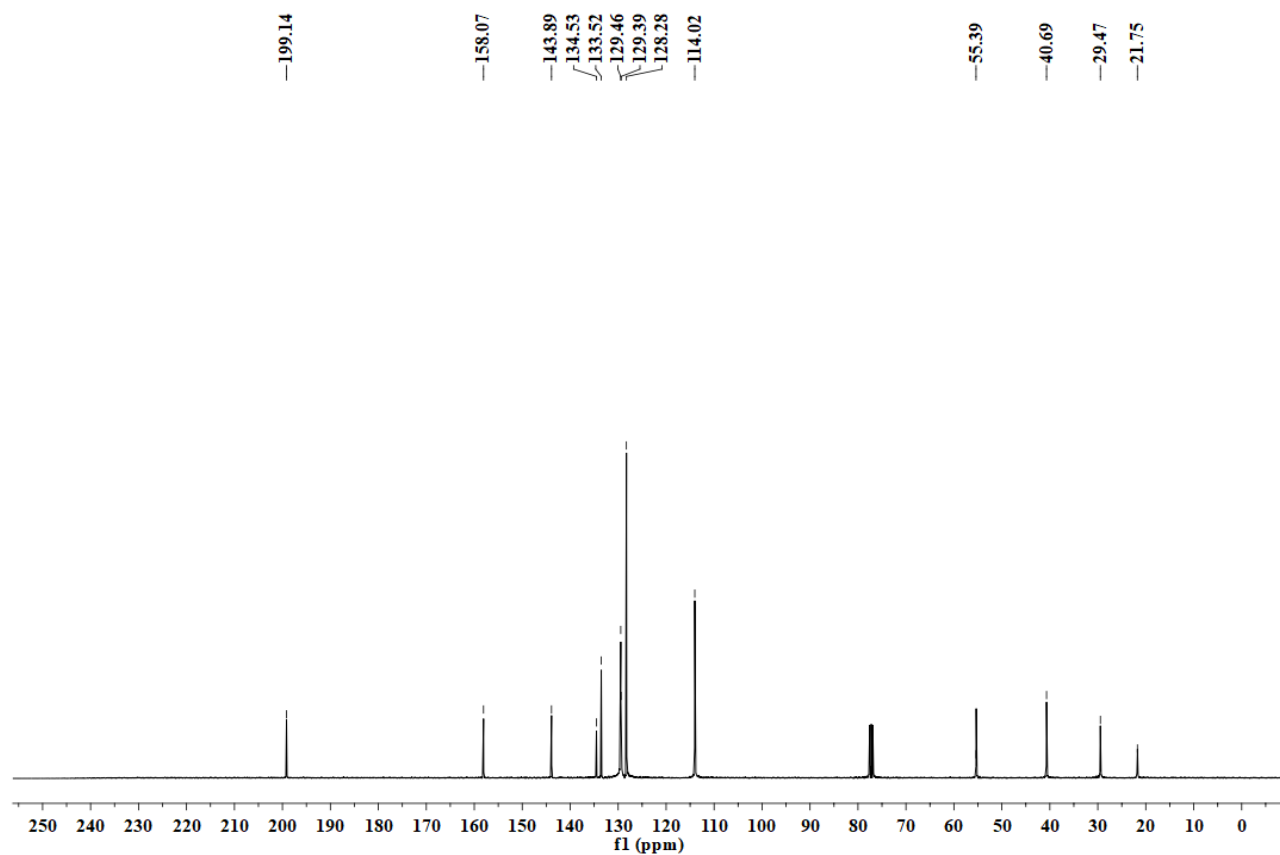

Figure S67. <sup>13</sup>C NMR spectrum of **5bc** taking CDCl<sub>3</sub> as solvent.

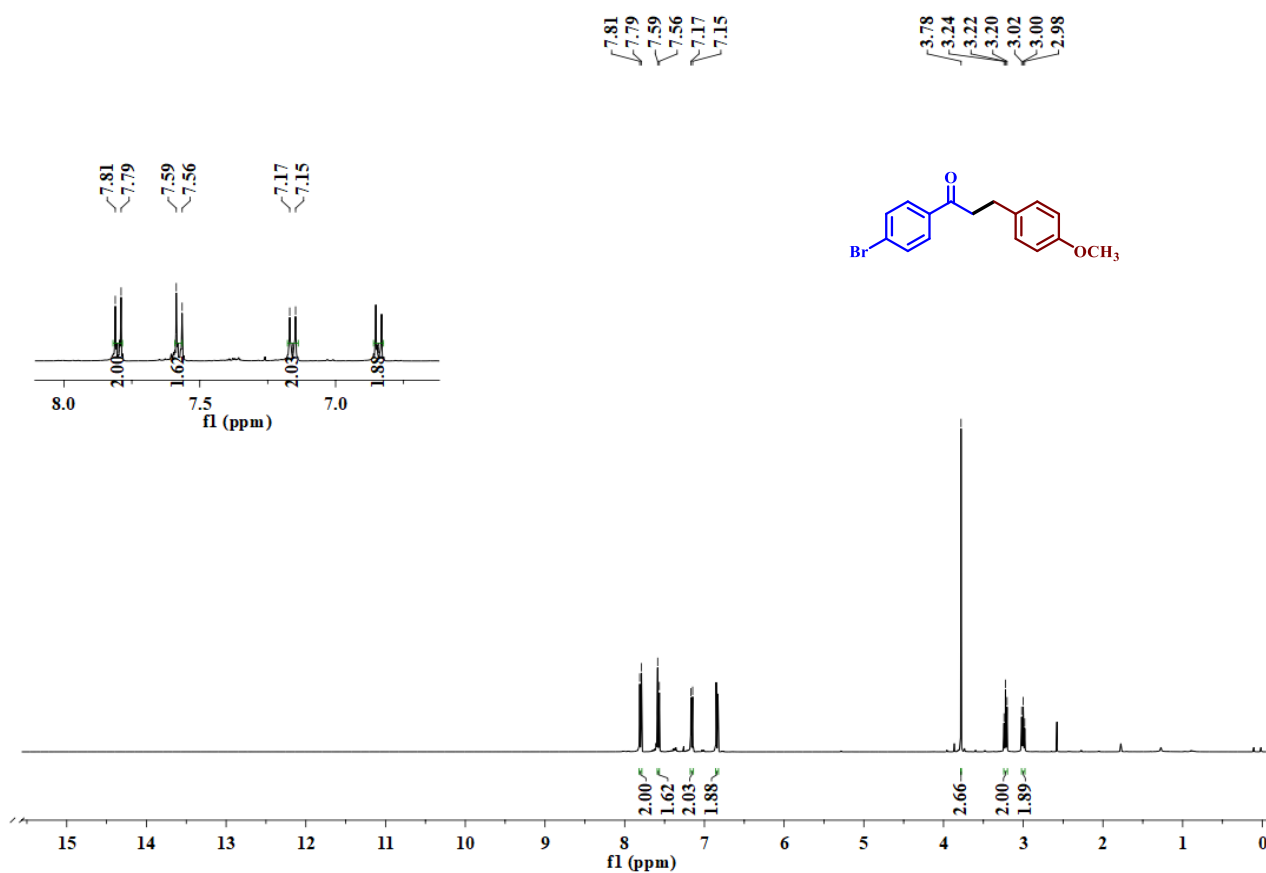

Figure S68. <sup>1</sup>H NMR spectrum of **5bd** taking CDCl<sub>3</sub> as solvent.

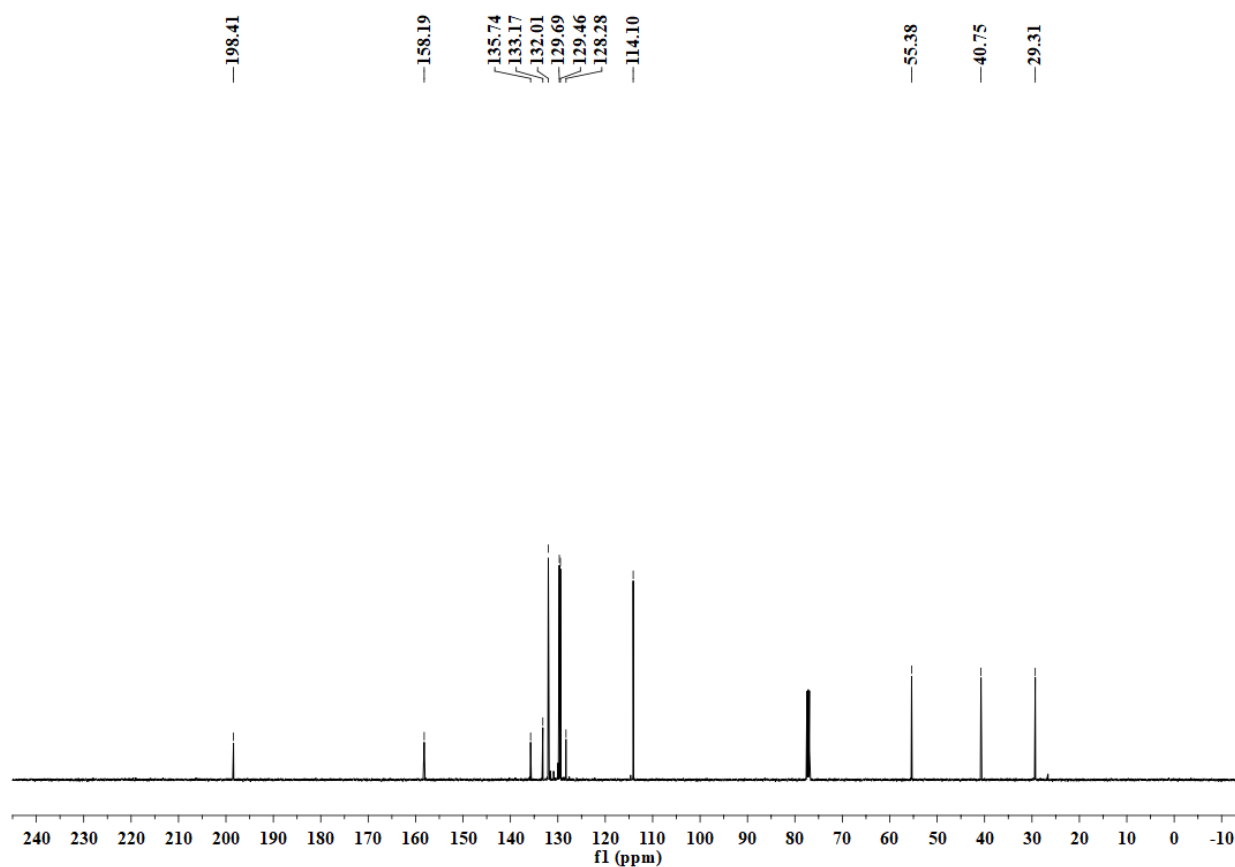

Figure S69. <sup>13</sup>C NMR spectrum of **5bd** taking CDCl<sub>3</sub> as solvent.

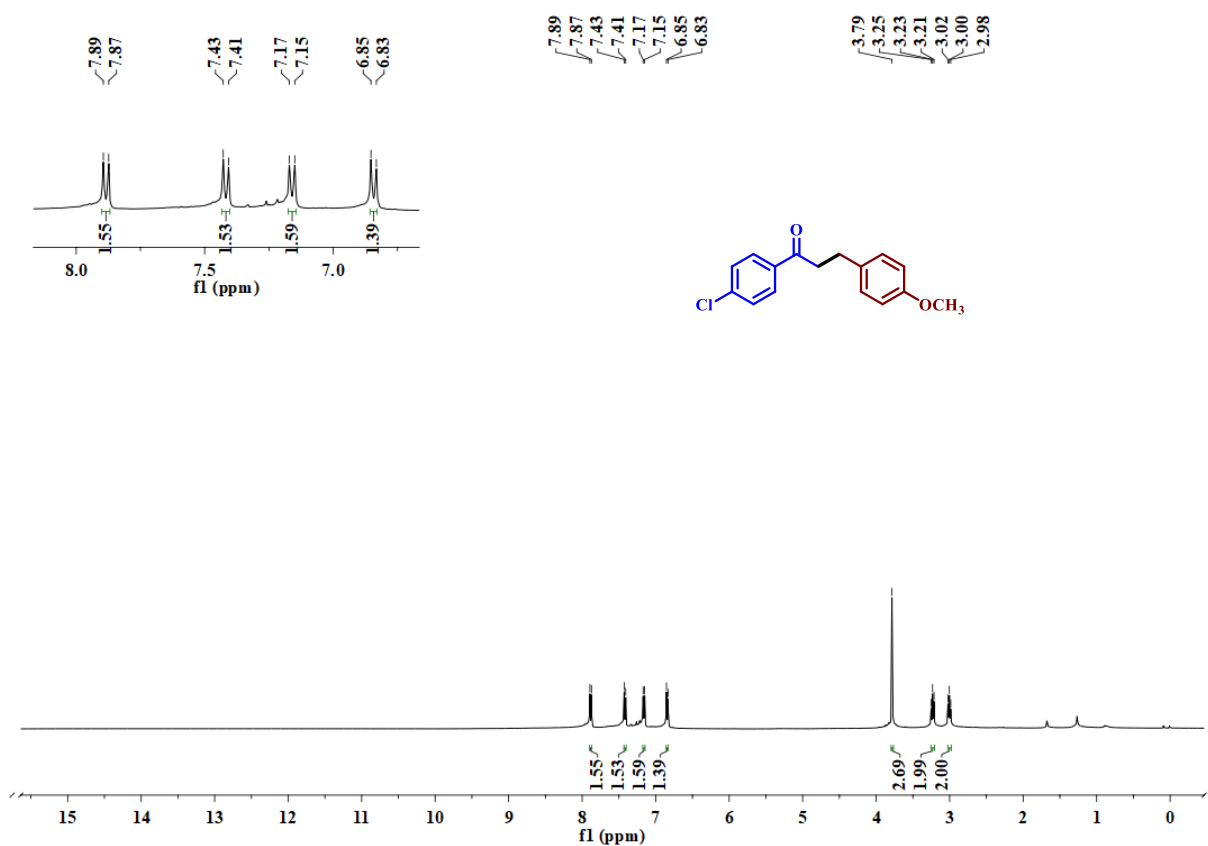

Figure S70. <sup>1</sup>H NMR spectrum of **5be** taking CDCl<sub>3</sub> as solvent.

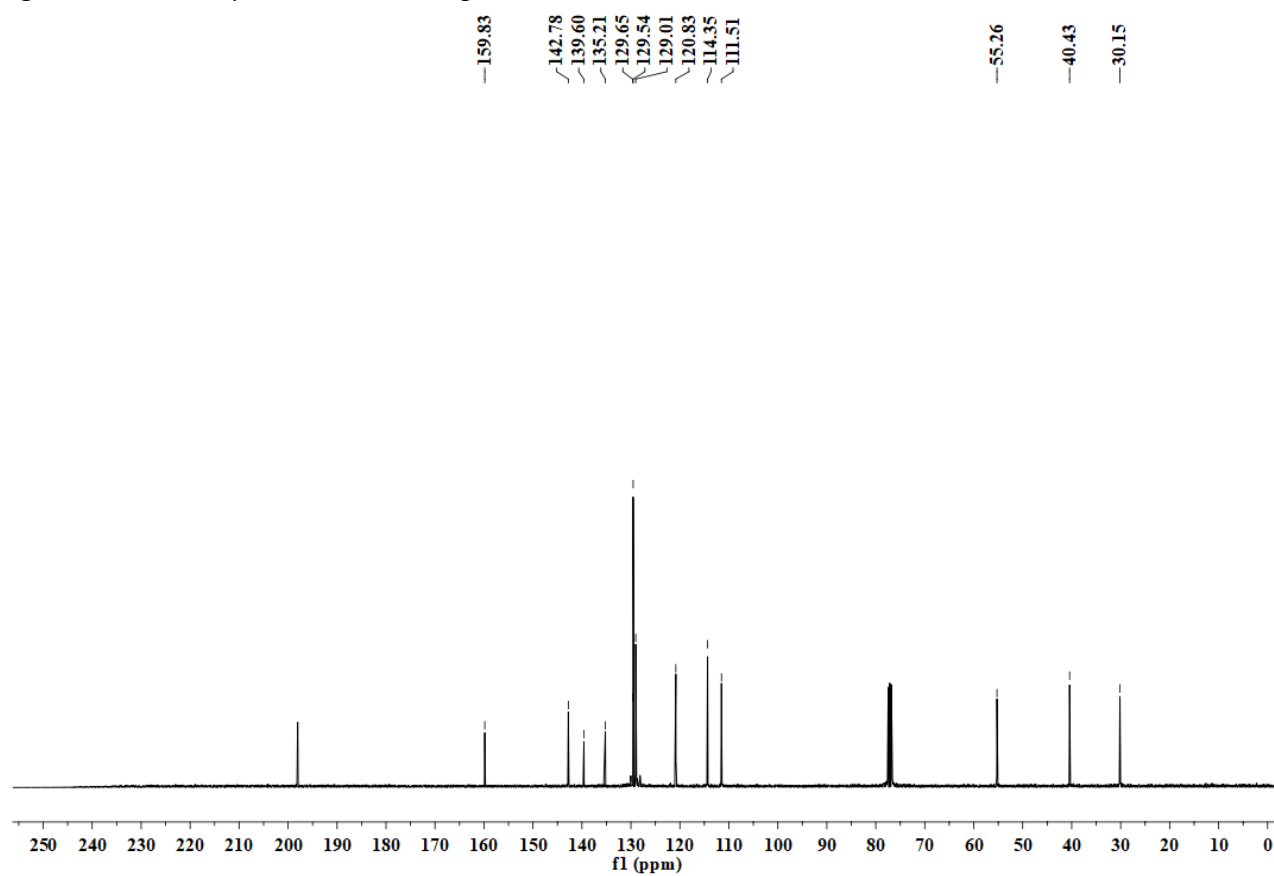

Figure S71. <sup>13</sup>C NMR spectrum of **5be** taking CDCl<sub>3</sub> as solvent.

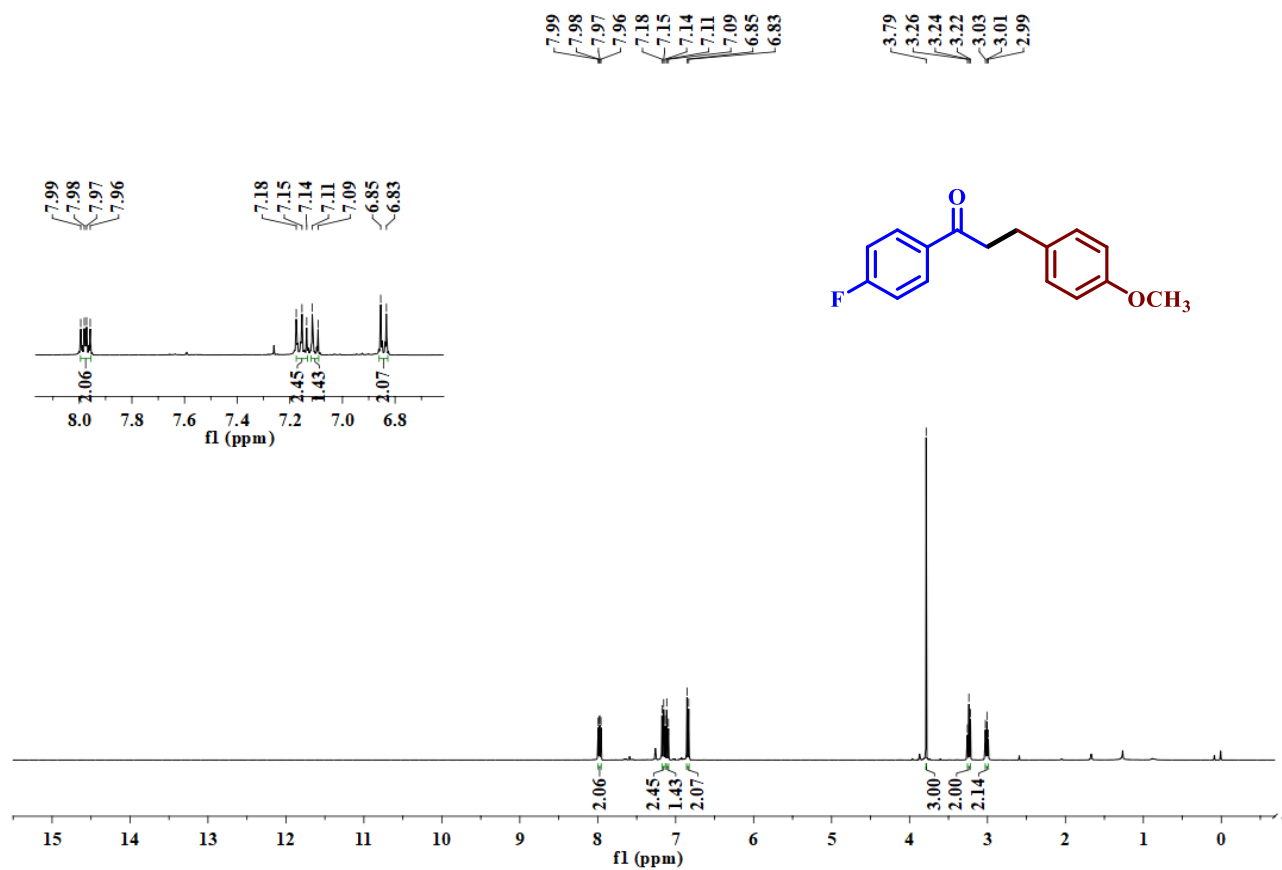

Figure S72. <sup>1</sup>H NMR spectrum of **5bf** taking CDCl<sub>3</sub> as solvent.

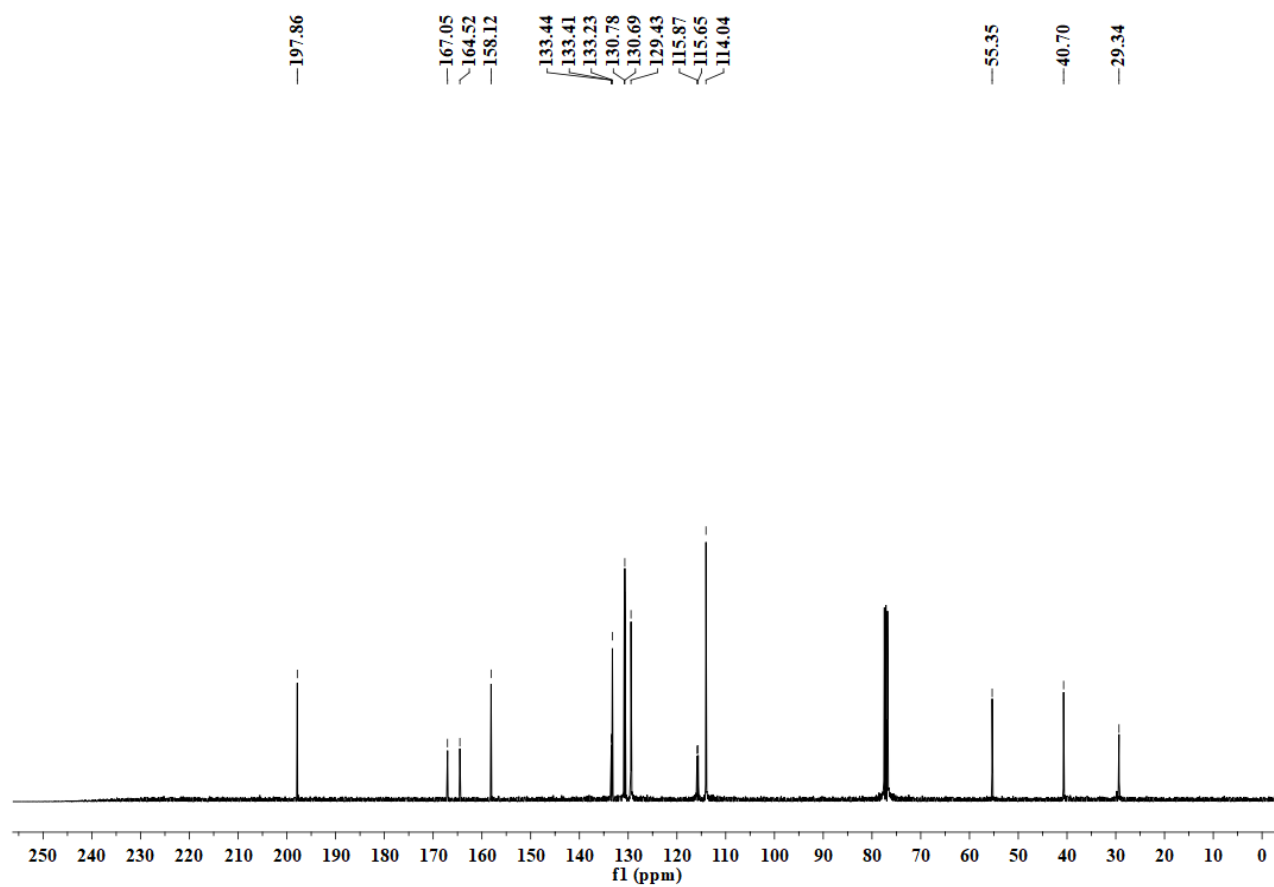

Figure S73. <sup>13</sup>C NMR spectrum of **5bf** taking CDCl<sub>3</sub> as solvent.



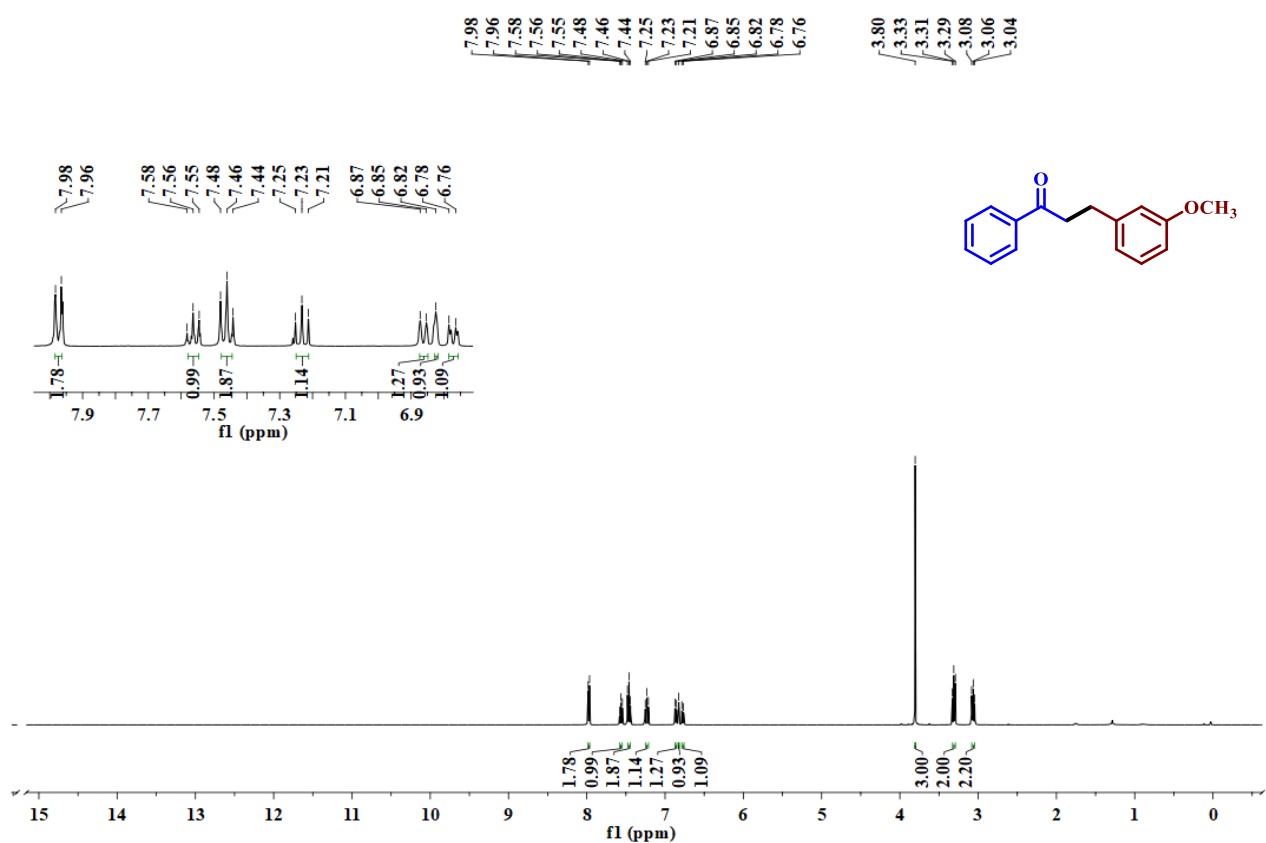

Figure S74. <sup>1</sup>H NMR spectrum of **5ca** taking CDCl<sub>3</sub> as solvent.

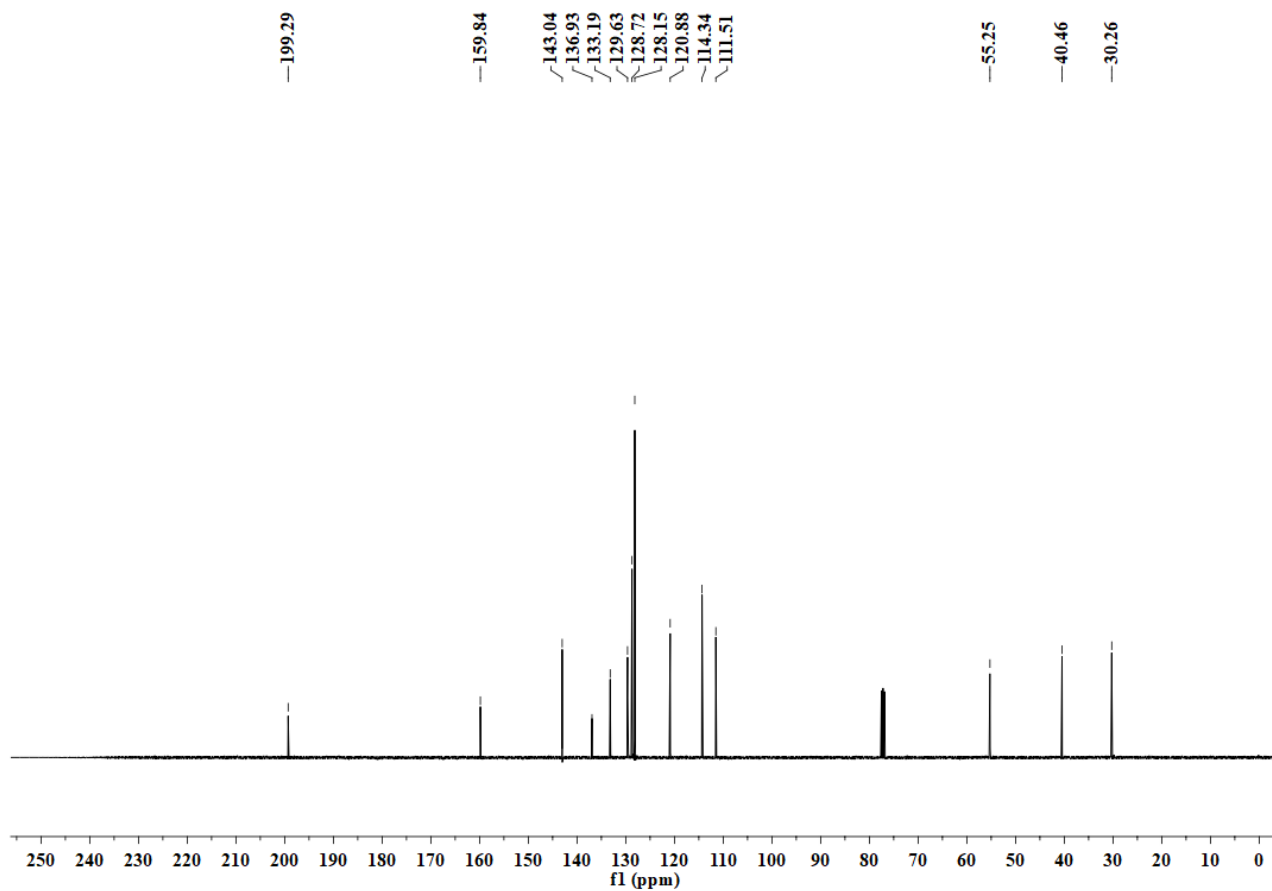

Figure S75. <sup>13</sup>C NMR spectrum of **5ca** taking CDCl<sub>3</sub> as solvent.

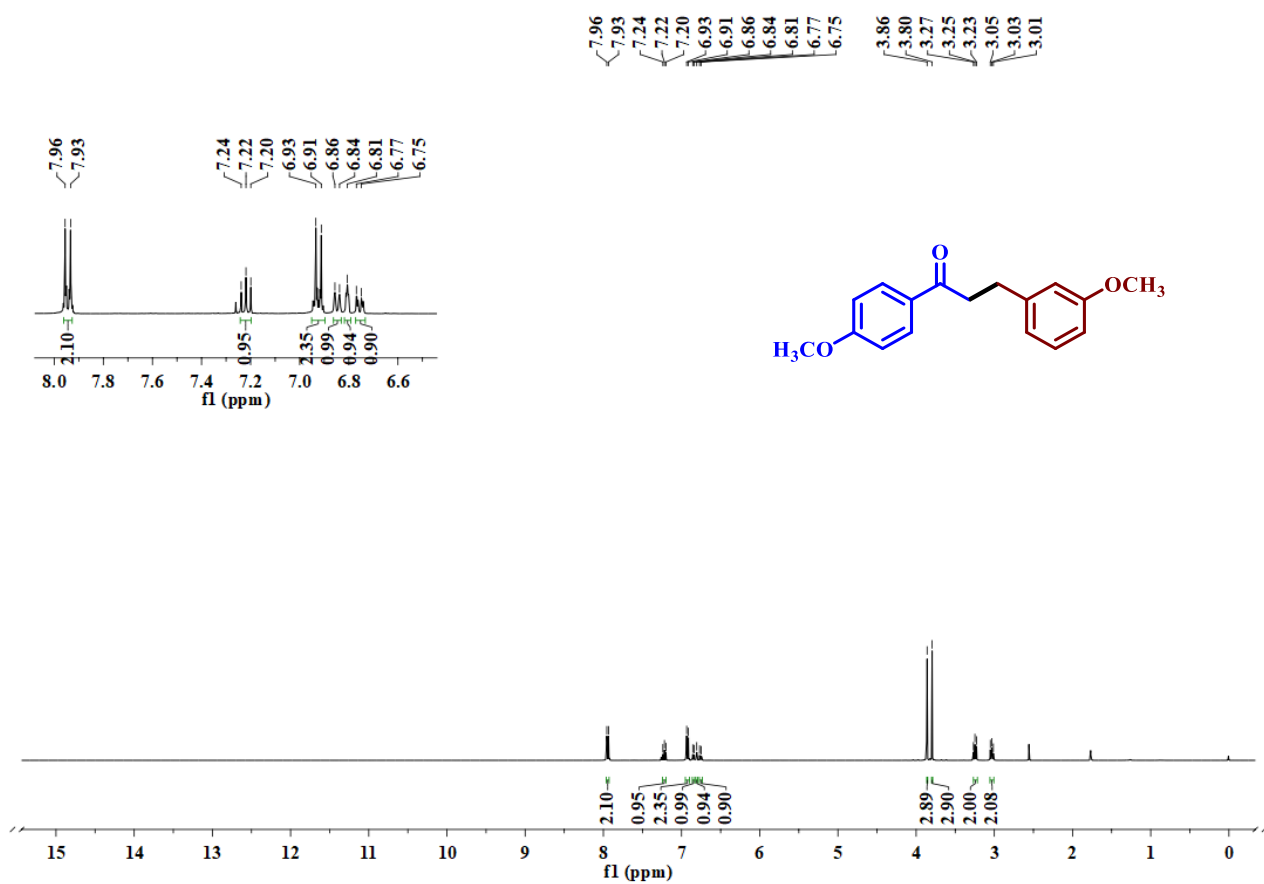

Figure S76. <sup>1</sup>H NMR spectrum of **5cb** taking CDCl<sub>3</sub> as solvent.

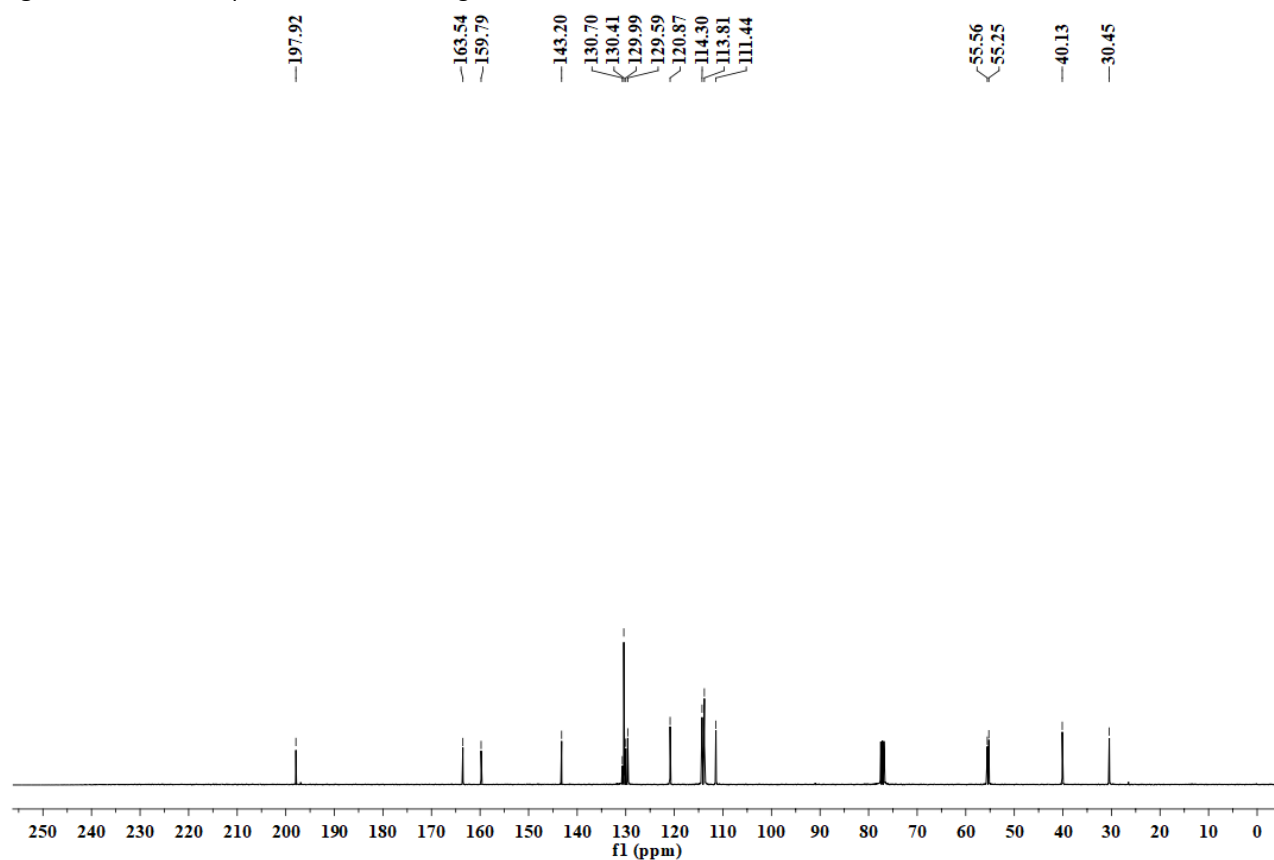

Figure S77. <sup>13</sup>C NMR spectrum of **5cb** taking CDCl<sub>3</sub> as solvent.

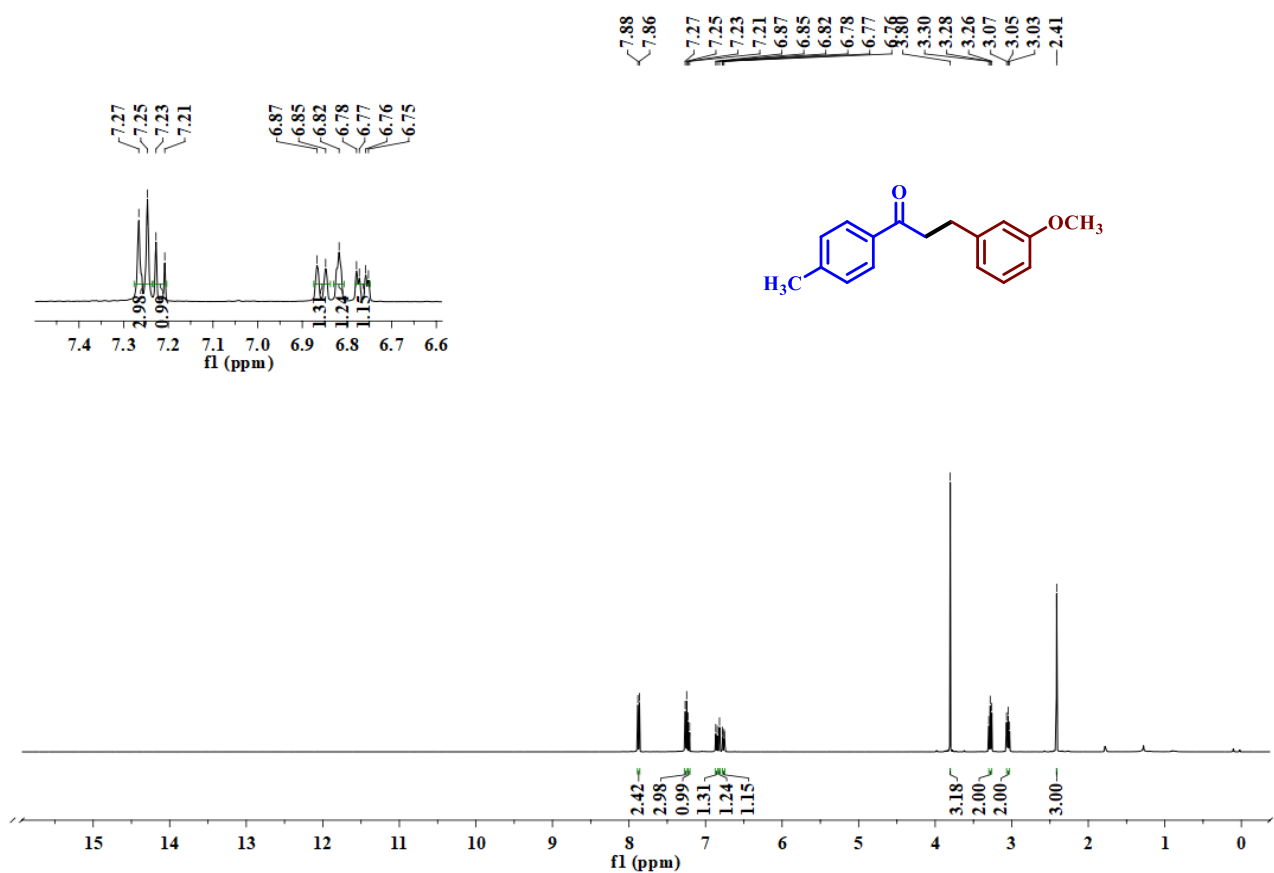

Figure S78. <sup>1</sup>H NMR spectrum of **5cc** taking CDCl<sub>3</sub> as solvent.

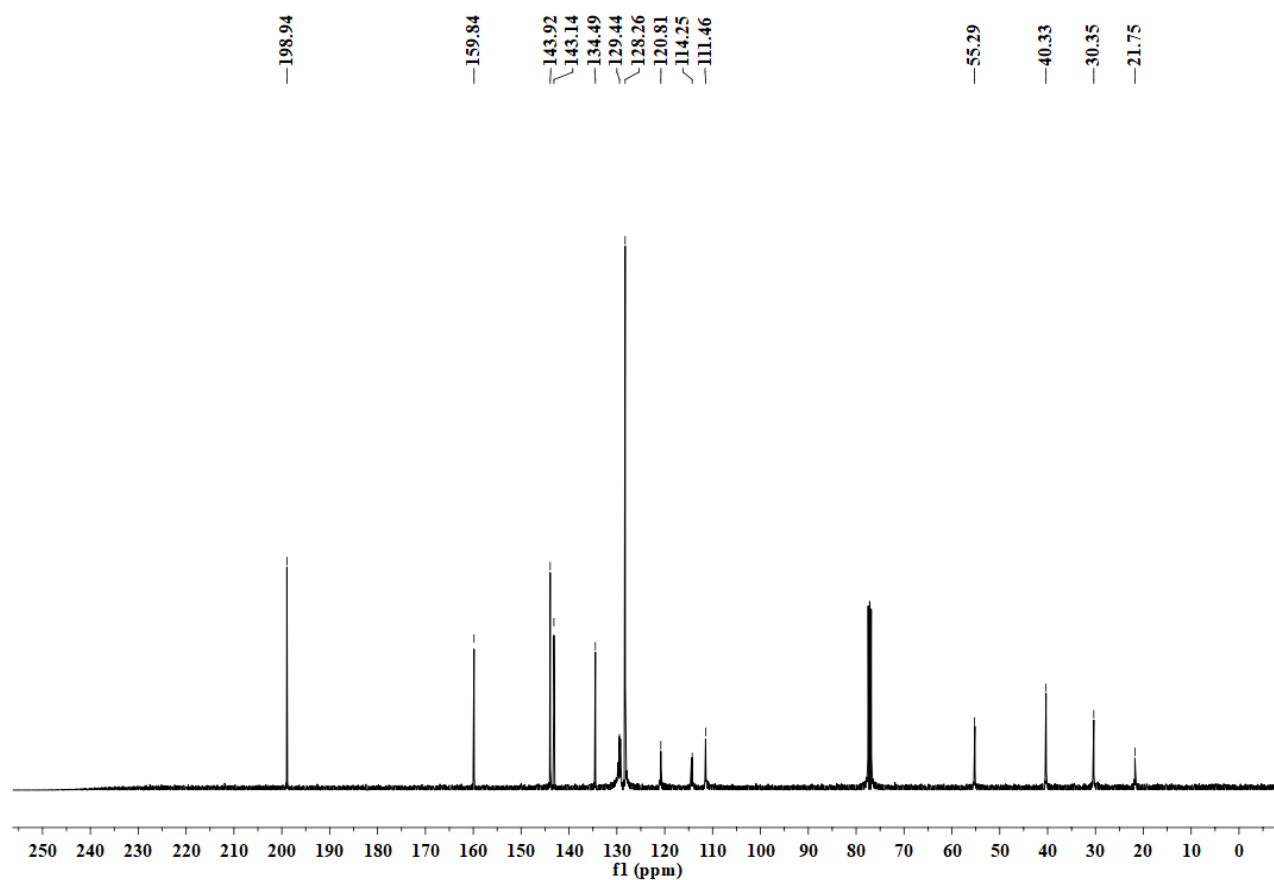

Figure S79. <sup>13</sup>C NMR spectrum of **5cc** taking CDCl<sub>3</sub> as solvent.

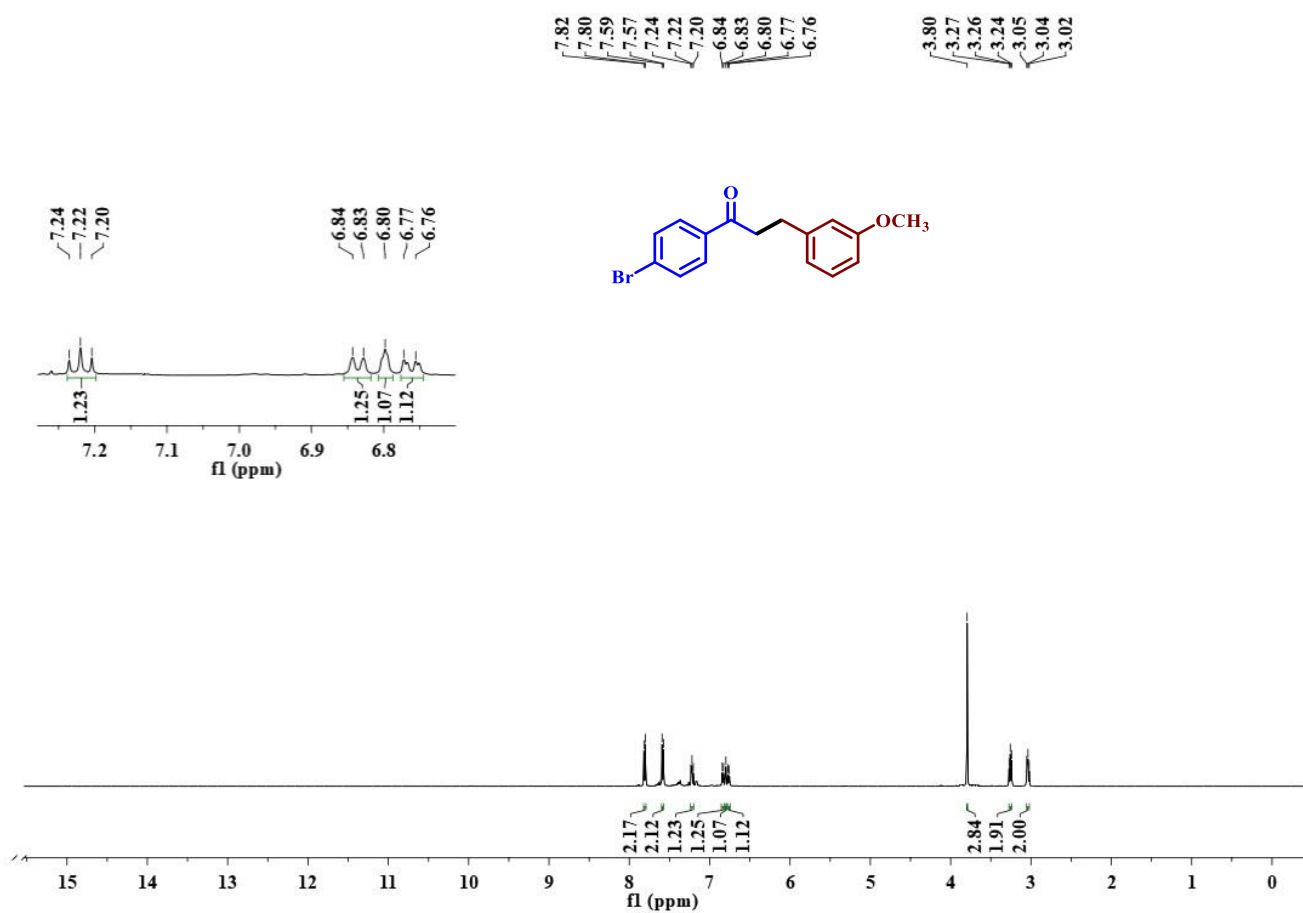

Figure S80. <sup>1</sup>H NMR spectrum of **5cd** taking CDCl<sub>3</sub> as solvent.

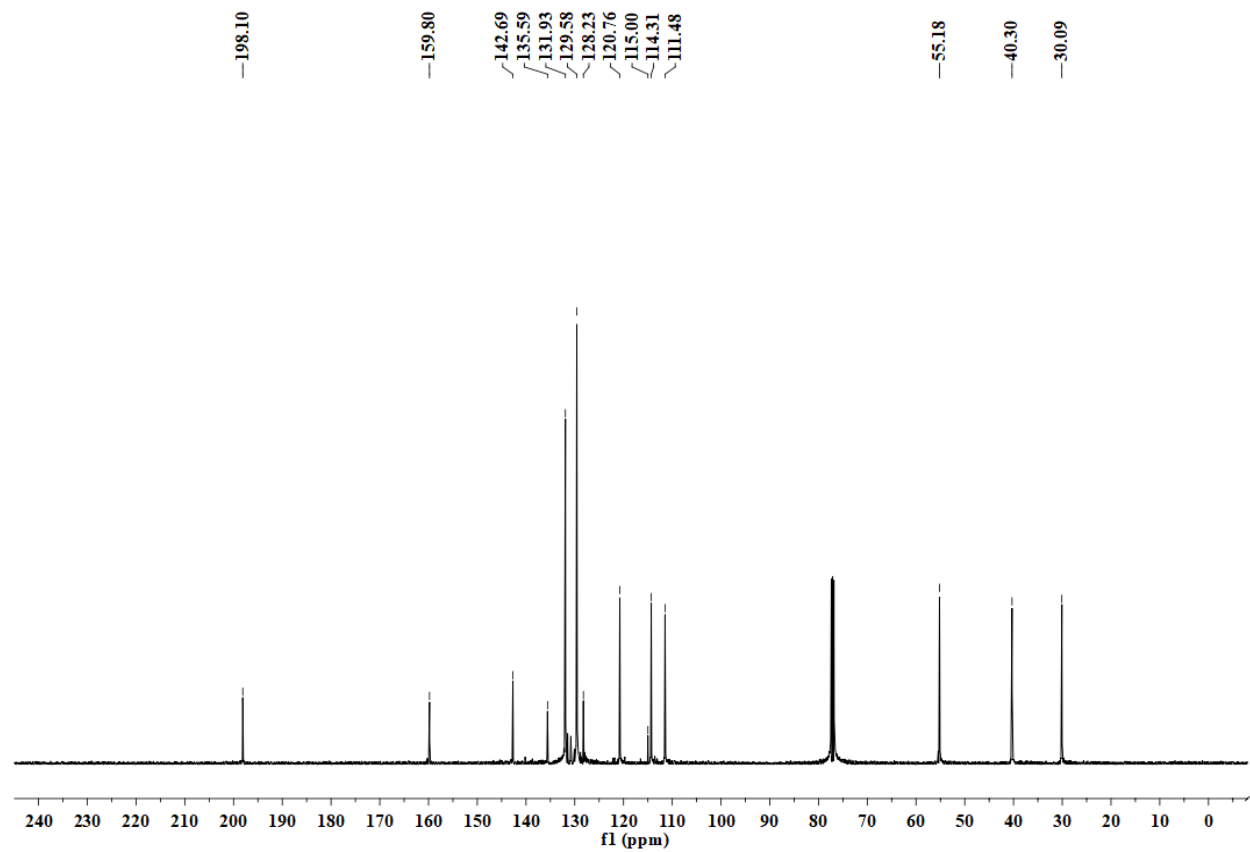

Figure S81. <sup>13</sup>C NMR spectrum of **5cd** taking CDCl<sub>3</sub> as solvent.

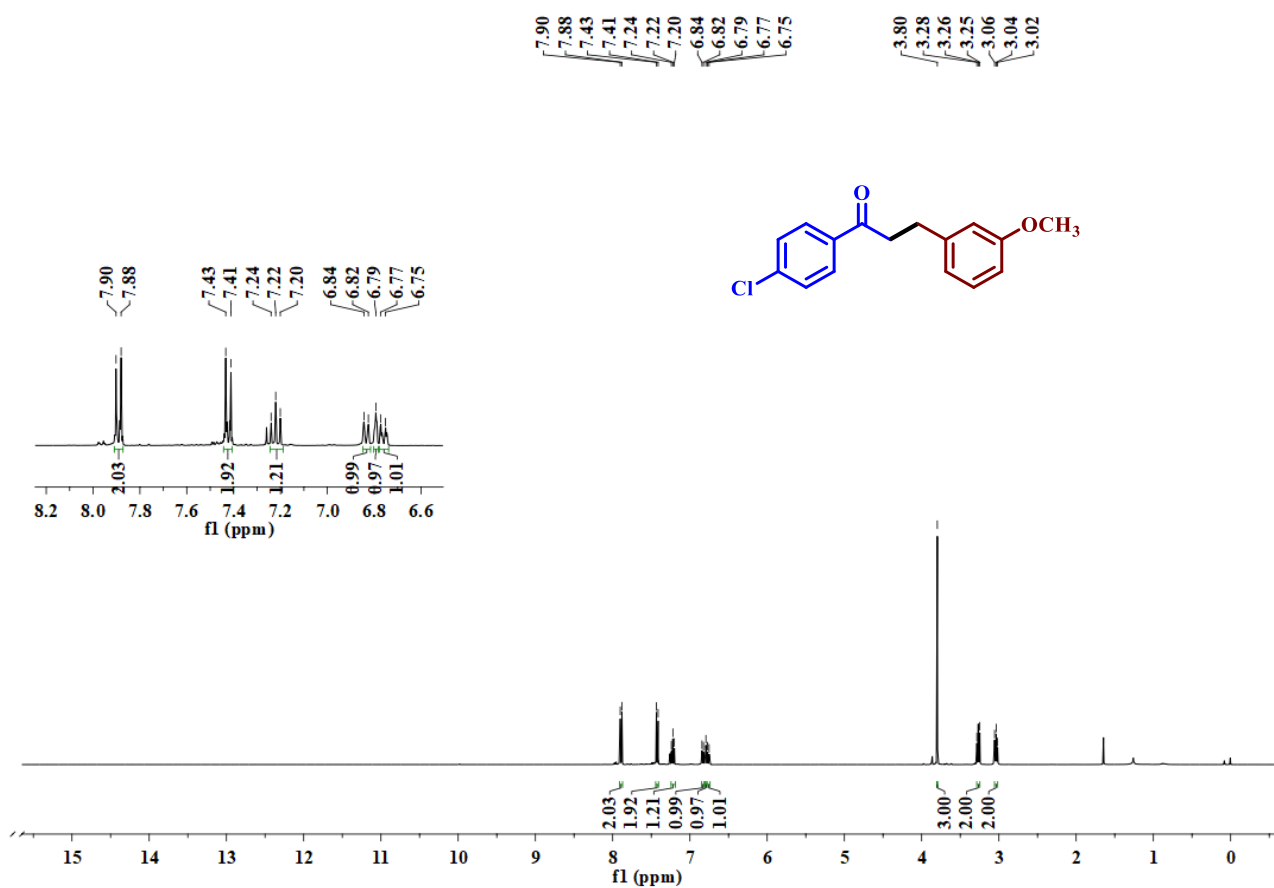

**Figure S82.** <sup>1</sup>H NMR spectrum of **5ce** taking CDCl<sub>3</sub> as solvent.

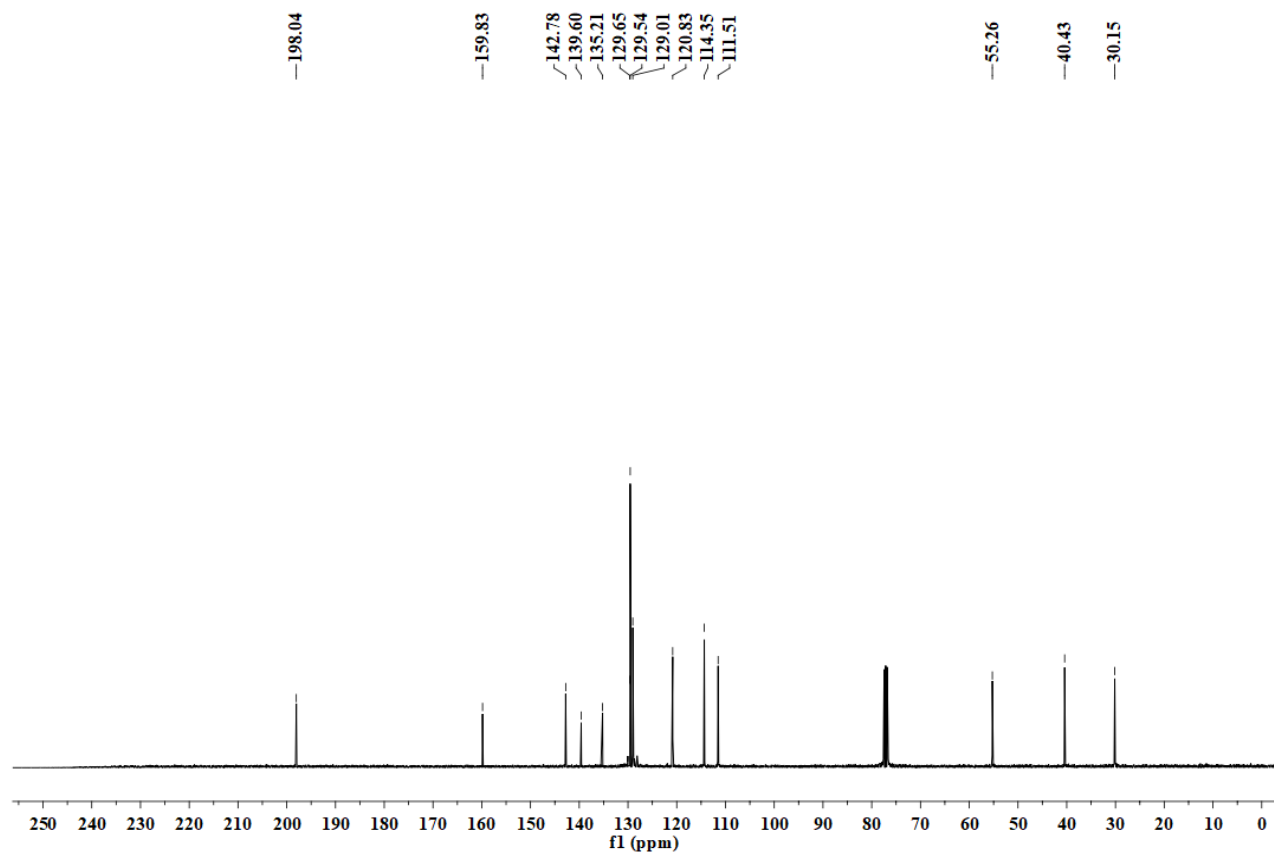

**Figure S83.** <sup>13</sup>C NMR spectrum of **5ce** taking CDCl<sub>3</sub> as solvent.

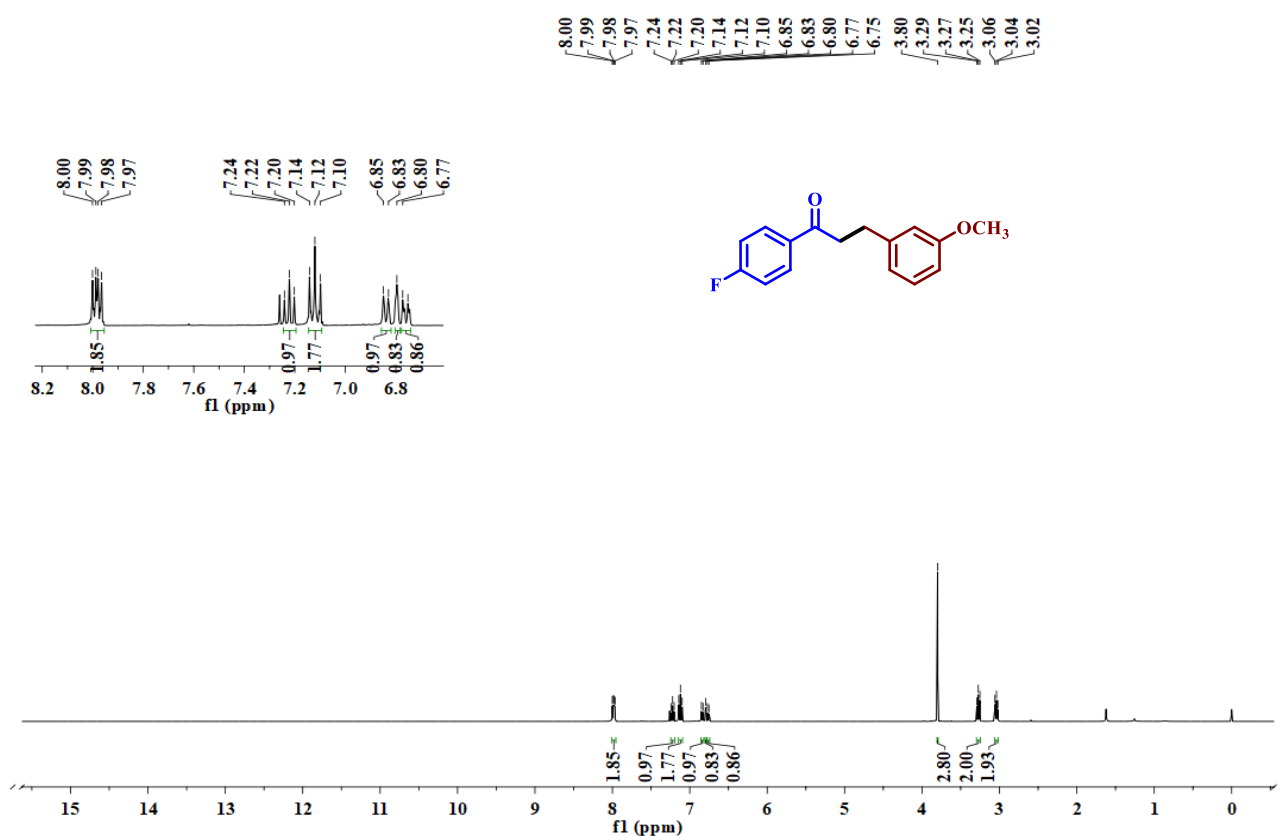

Figure S84. <sup>1</sup>H NMR spectrum of **5cf** taking CDCl<sub>3</sub> as solvent.

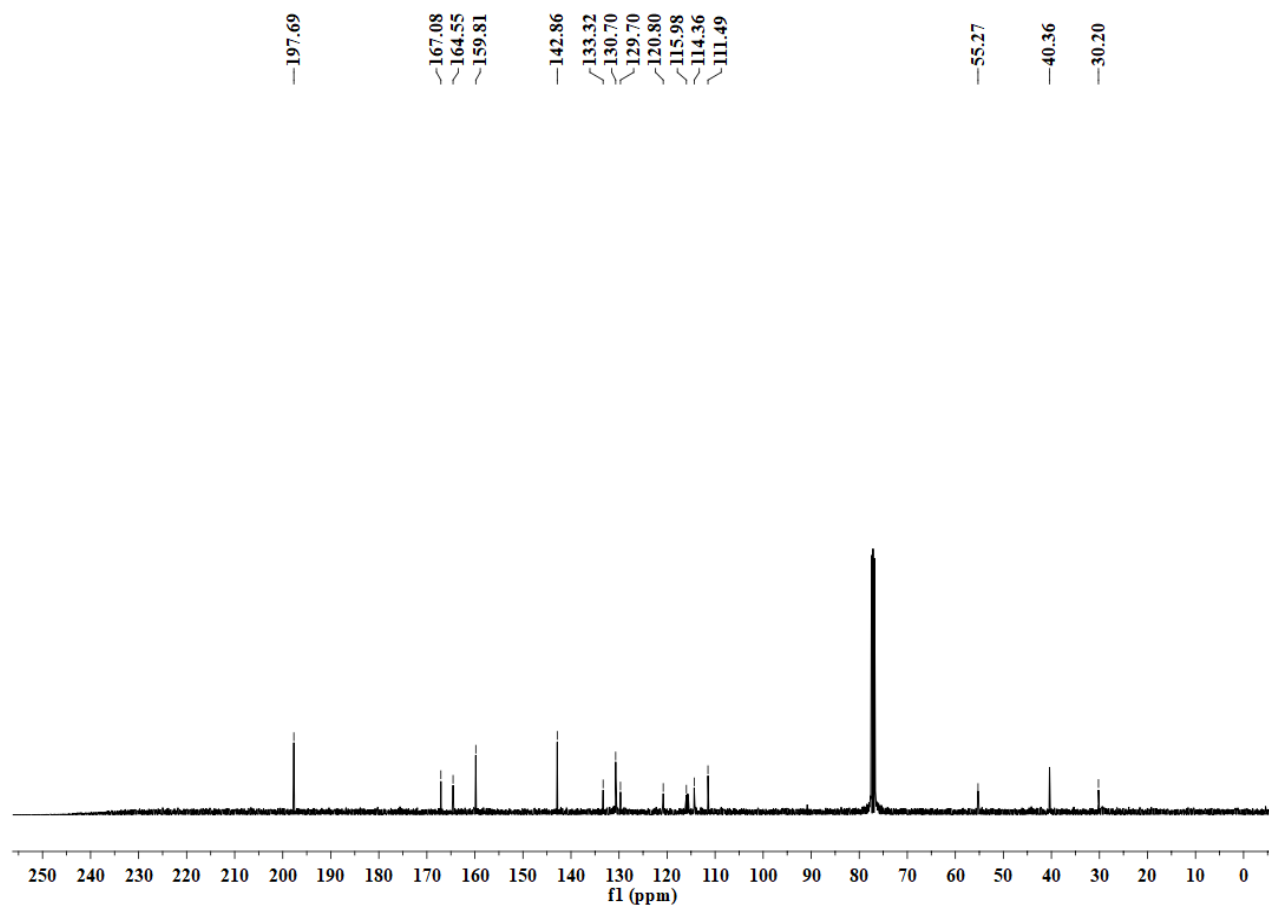

Figure S85. <sup>13</sup>C NMR spectrum of **5cf** taking CDCl<sub>3</sub> as solvent.

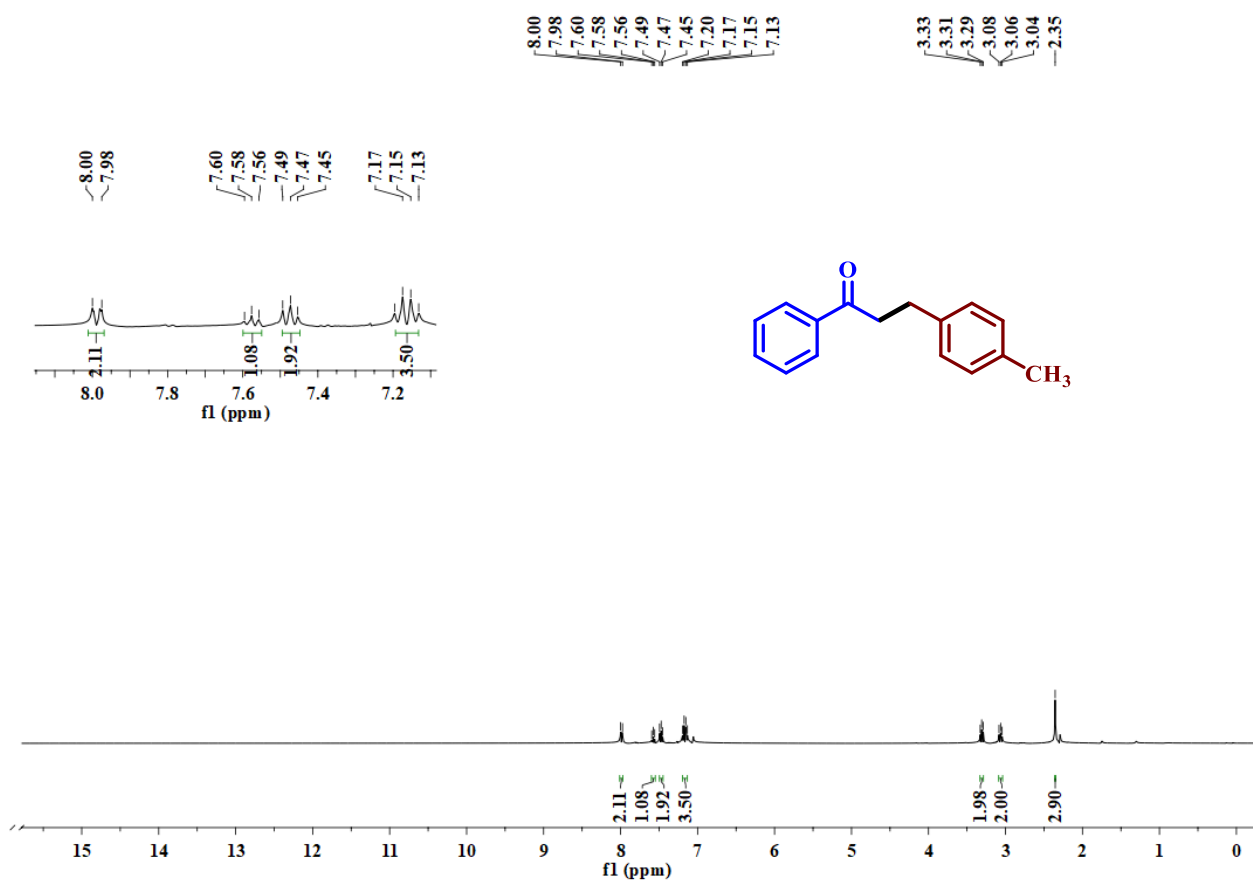

**Figure S86.** <sup>1</sup>H NMR spectrum of **5da** taking CDCl<sub>3</sub> as solvent.

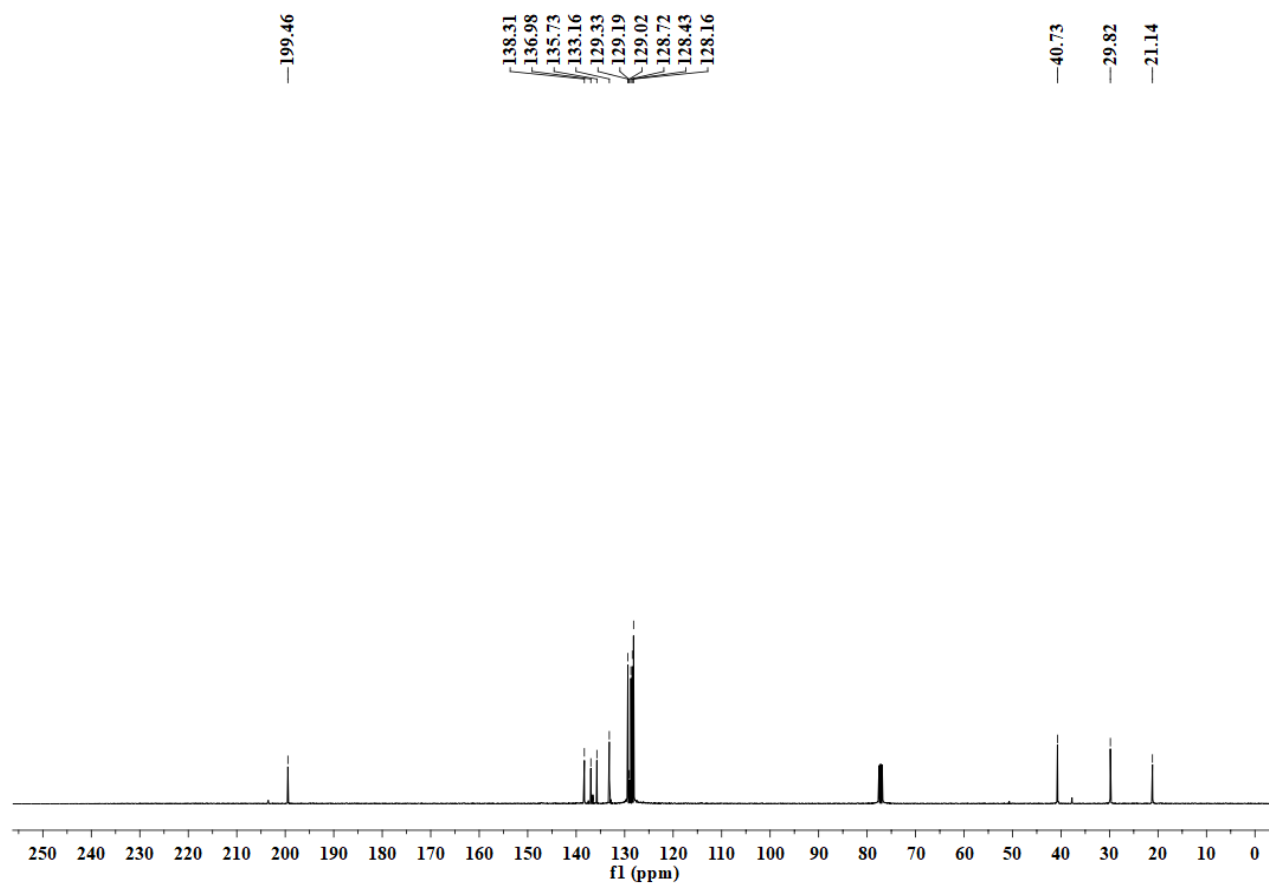

**Figure S87.** <sup>13</sup>C NMR spectrum of **5da** taking CDCl<sub>3</sub> as solvent.

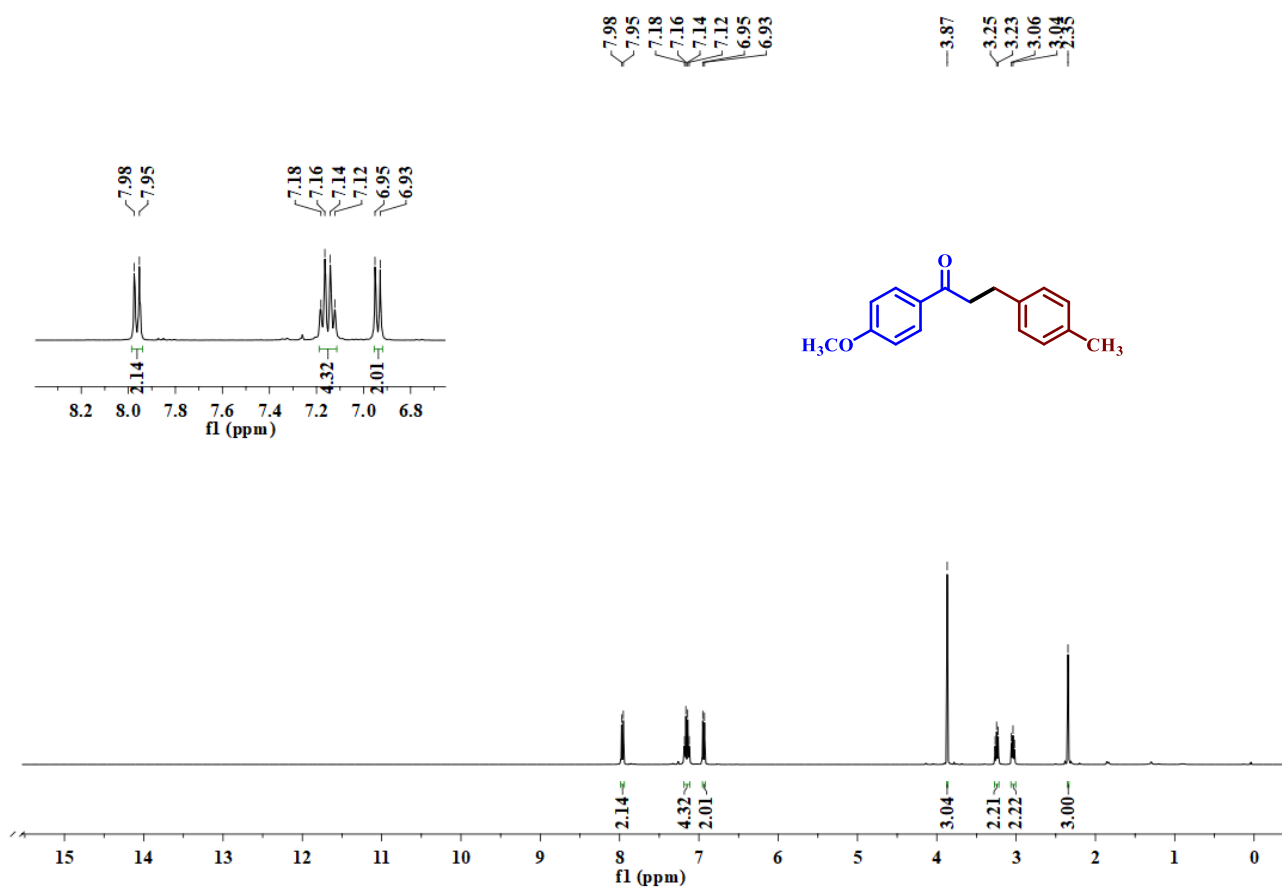

Figure S88. <sup>1</sup>H NMR spectrum of **5db** taking CDCl<sub>3</sub> as solvent.

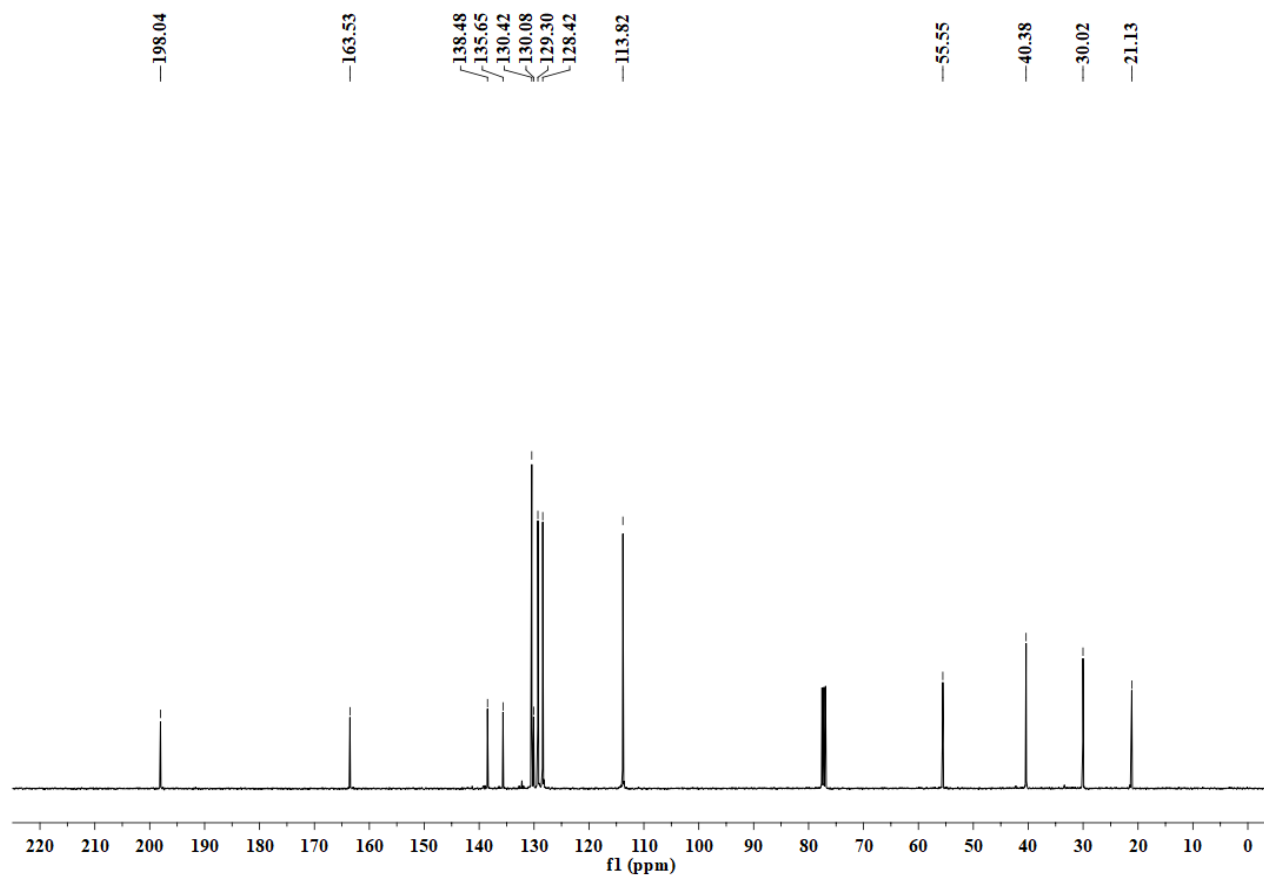

Figure S89. <sup>13</sup>C NMR spectrum of **5db** taking CDCl<sub>3</sub> as solvent.



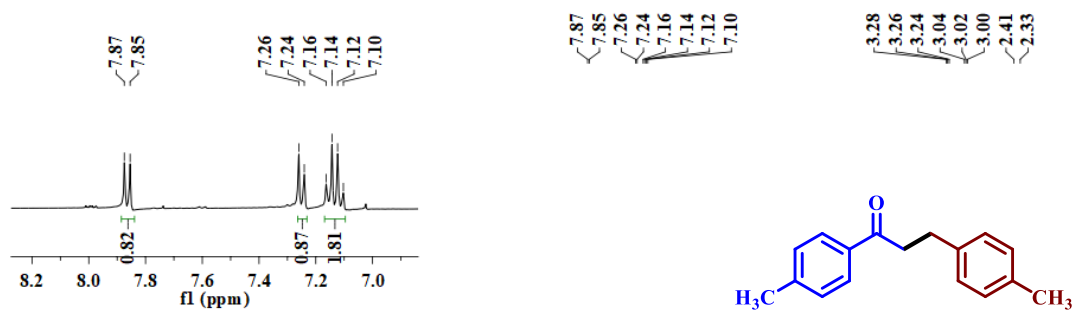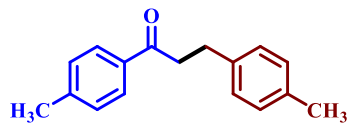

Figure S90. <sup>1</sup>H NMR spectrum of **5dc** taking CDCl<sub>3</sub> as solvent.

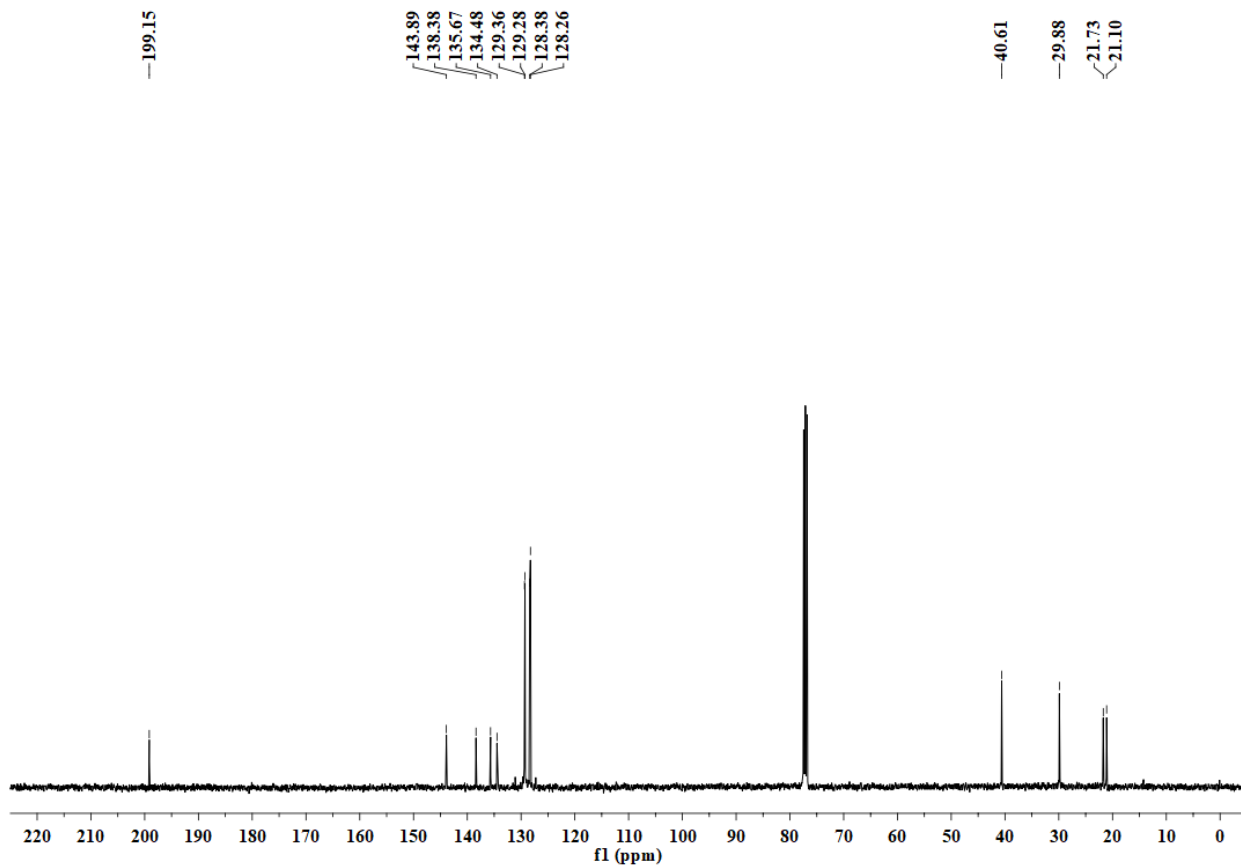

Figure S91. <sup>13</sup>C NMR spectrum of **5dc** taking CDCl<sub>3</sub> as solvent.

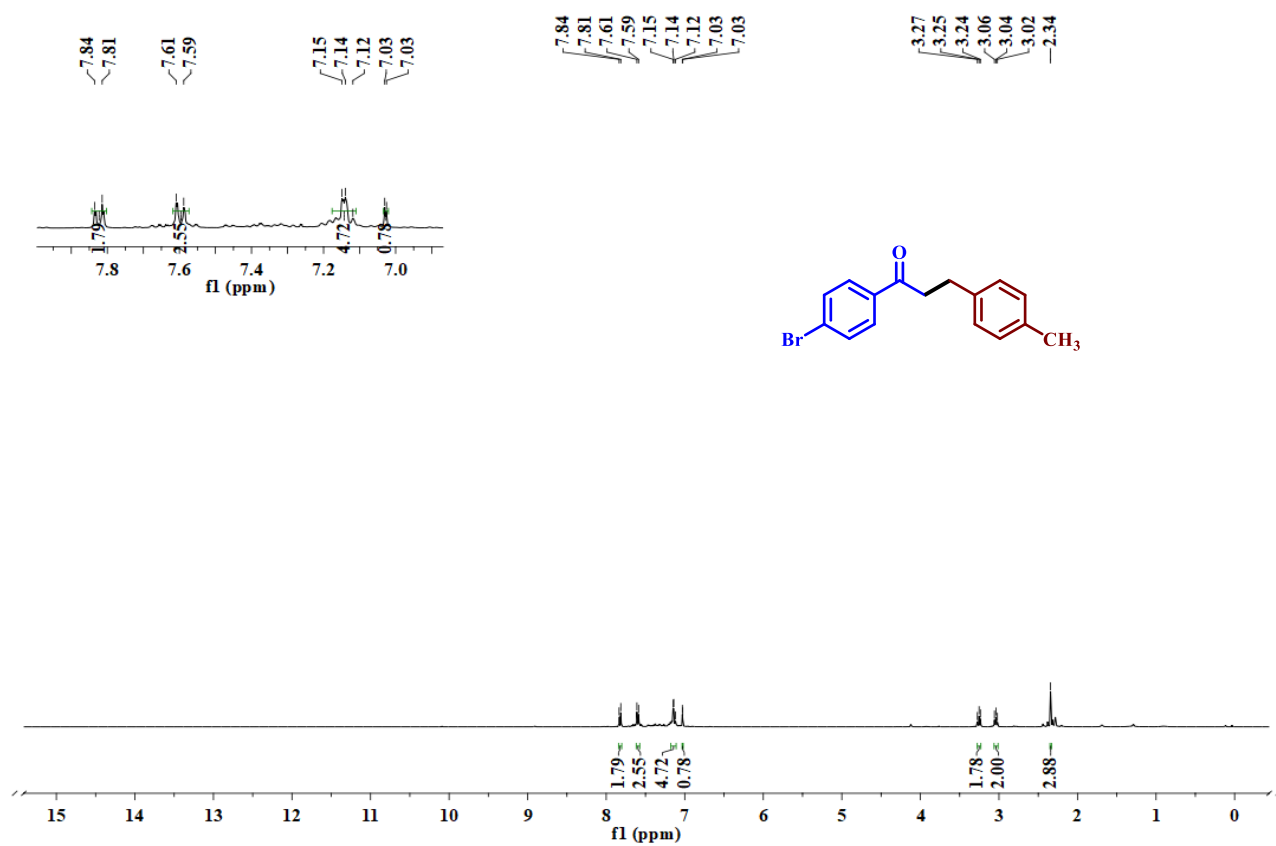

Figure S92. <sup>1</sup>H NMR spectrum of **5dd** taking CDCl<sub>3</sub> as solvent.

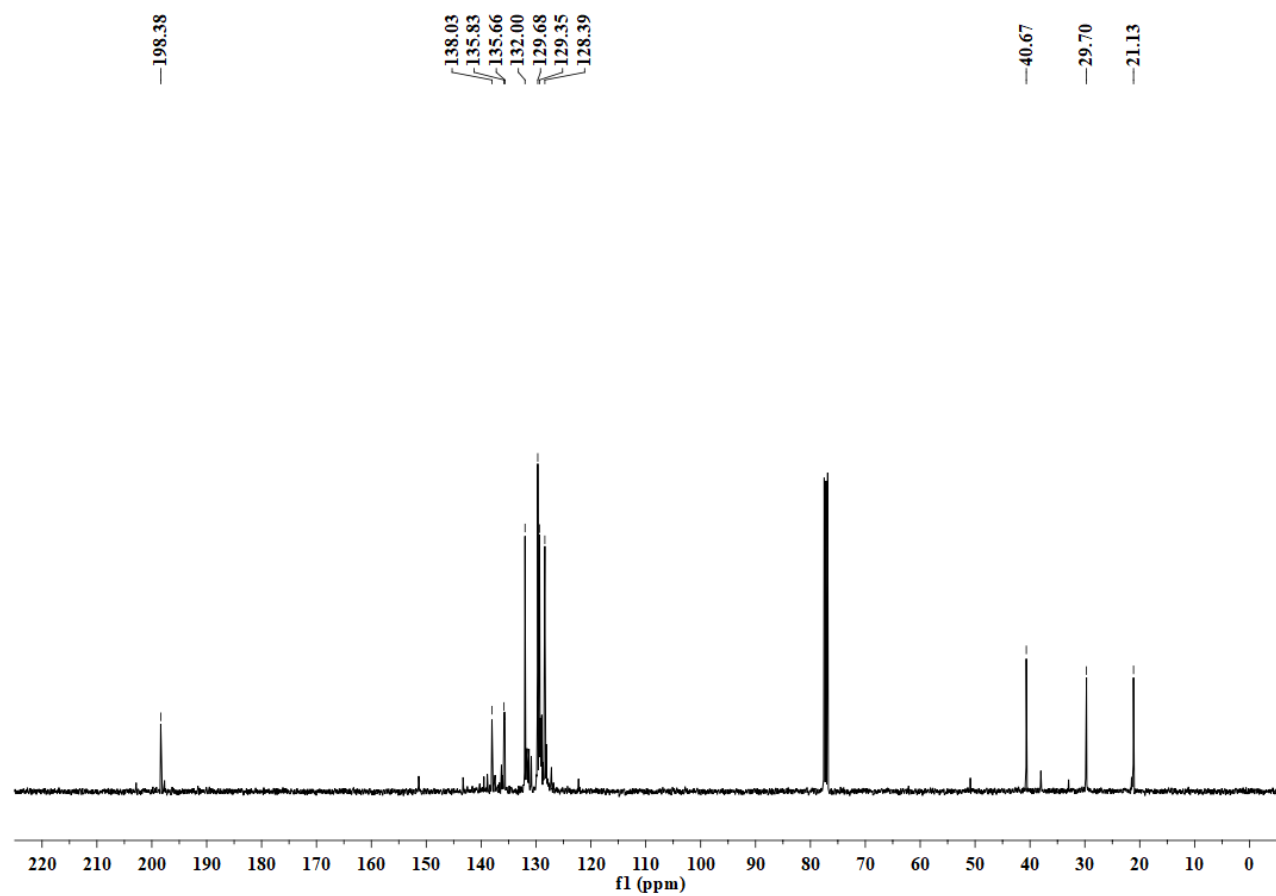

Figure S93. <sup>13</sup>C NMR spectrum of **5dd** taking CDCl<sub>3</sub> as solvent.

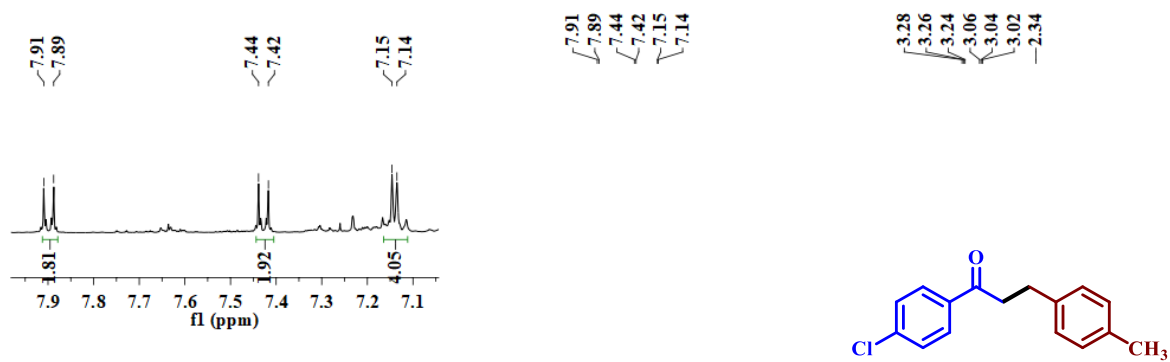

Figure S94. <sup>1</sup>H NMR spectrum of **5de** taking CDCl<sub>3</sub> as solvent.

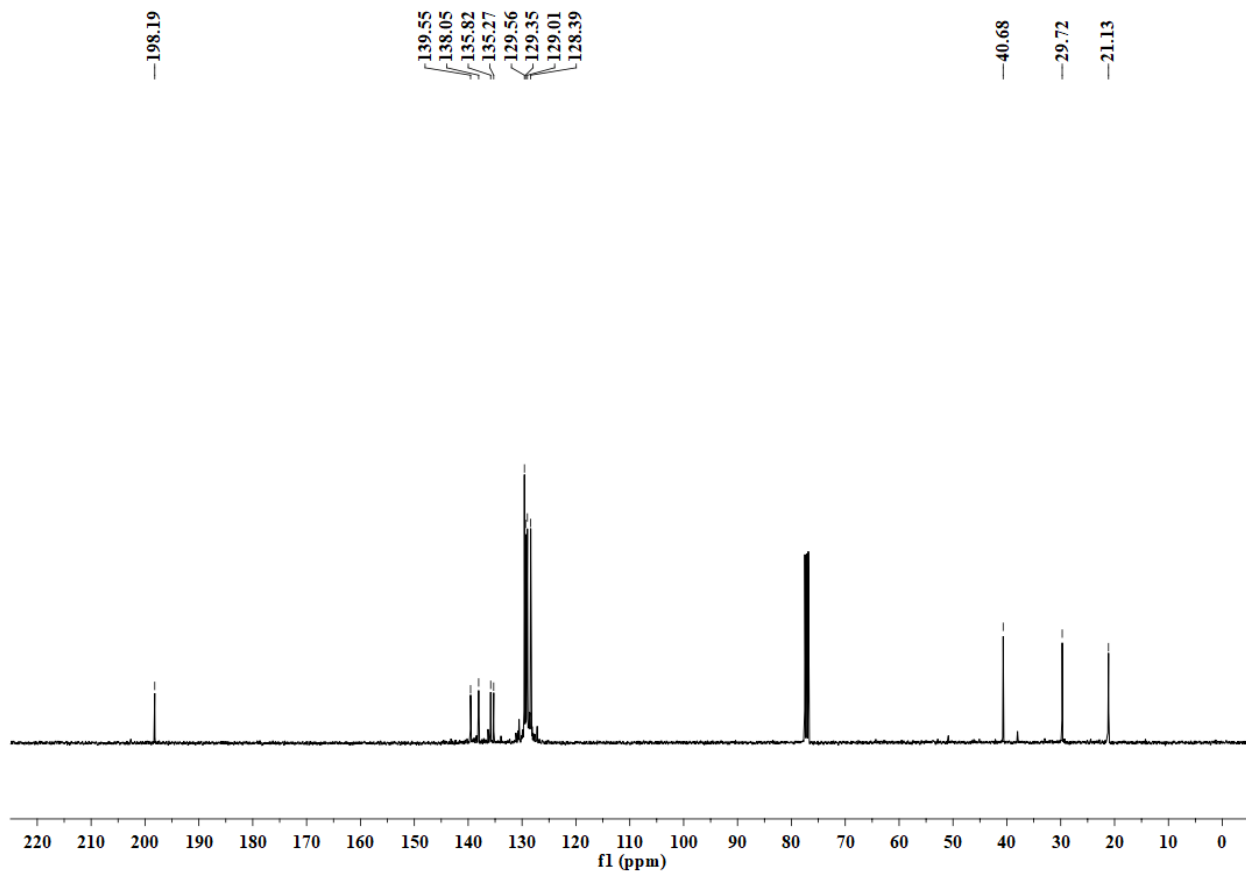

Figure S95. <sup>13</sup>C NMR spectrum of **5de** taking CDCl<sub>3</sub> as solvent.

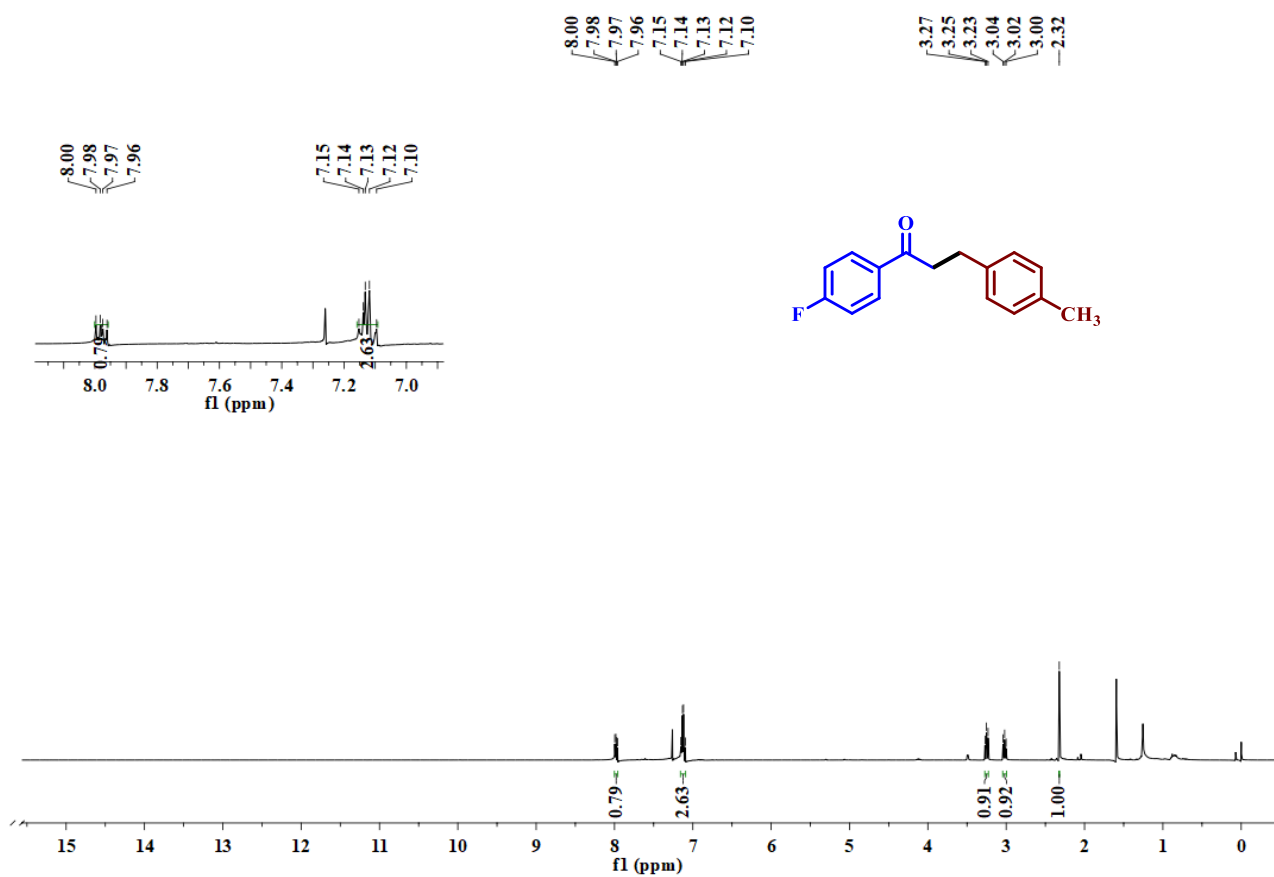

Figure S96. <sup>1</sup>H NMR spectrum of **5df** taking CDCl<sub>3</sub> as solvent.

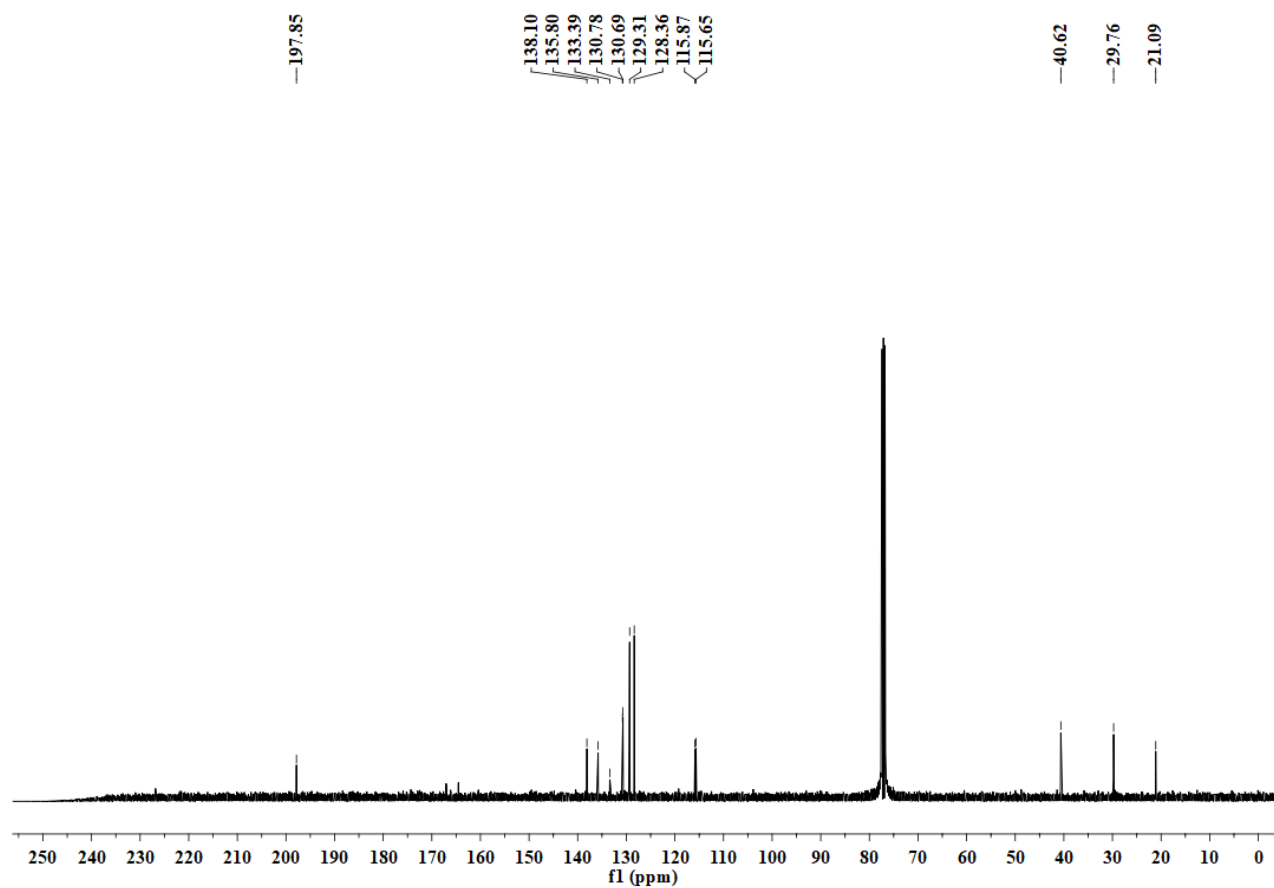

Figure S97. <sup>13</sup>C NMR spectrum of **5df** taking CDCl<sub>3</sub> as solvent.

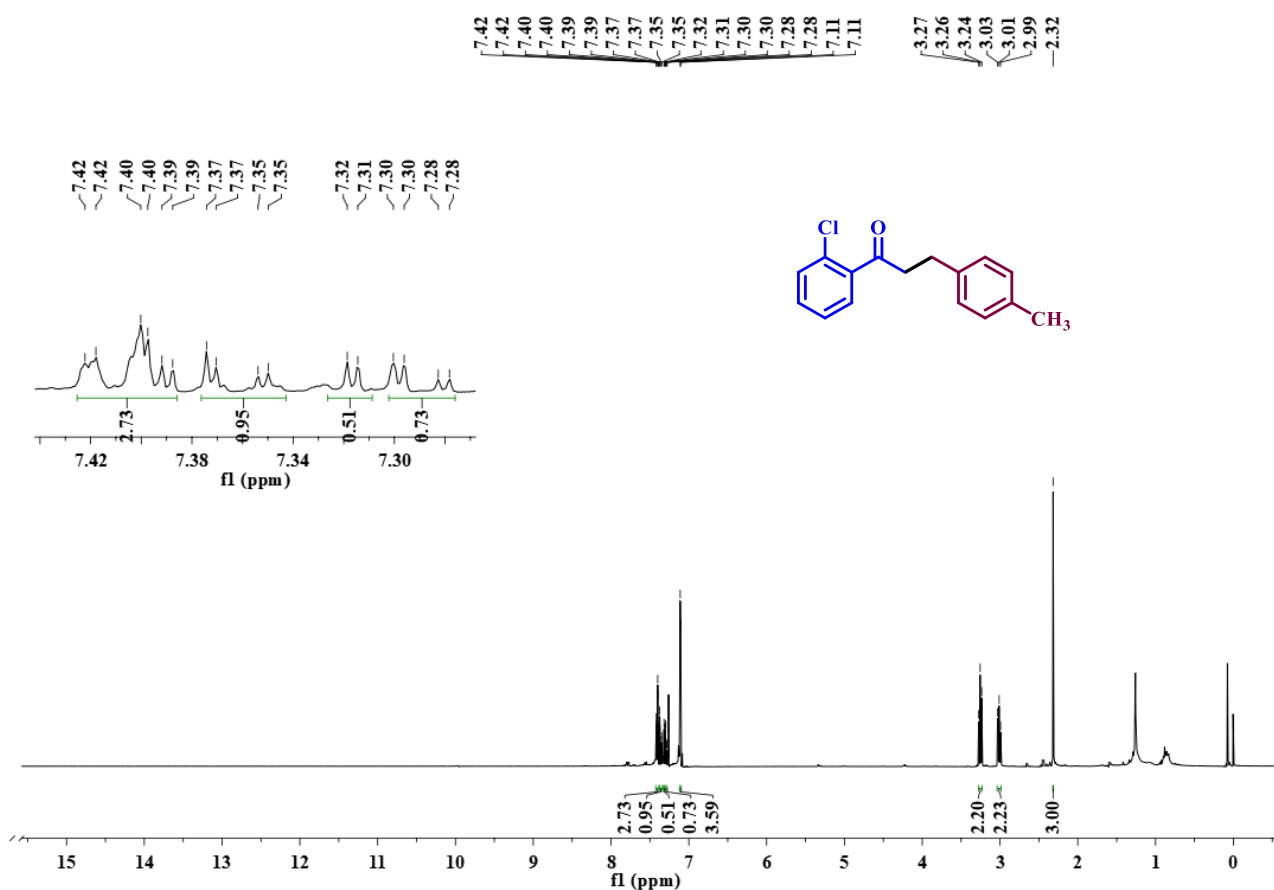

Figure S98. <sup>1</sup>H NMR spectrum of **5dg** taking CDCl<sub>3</sub> as solvent.

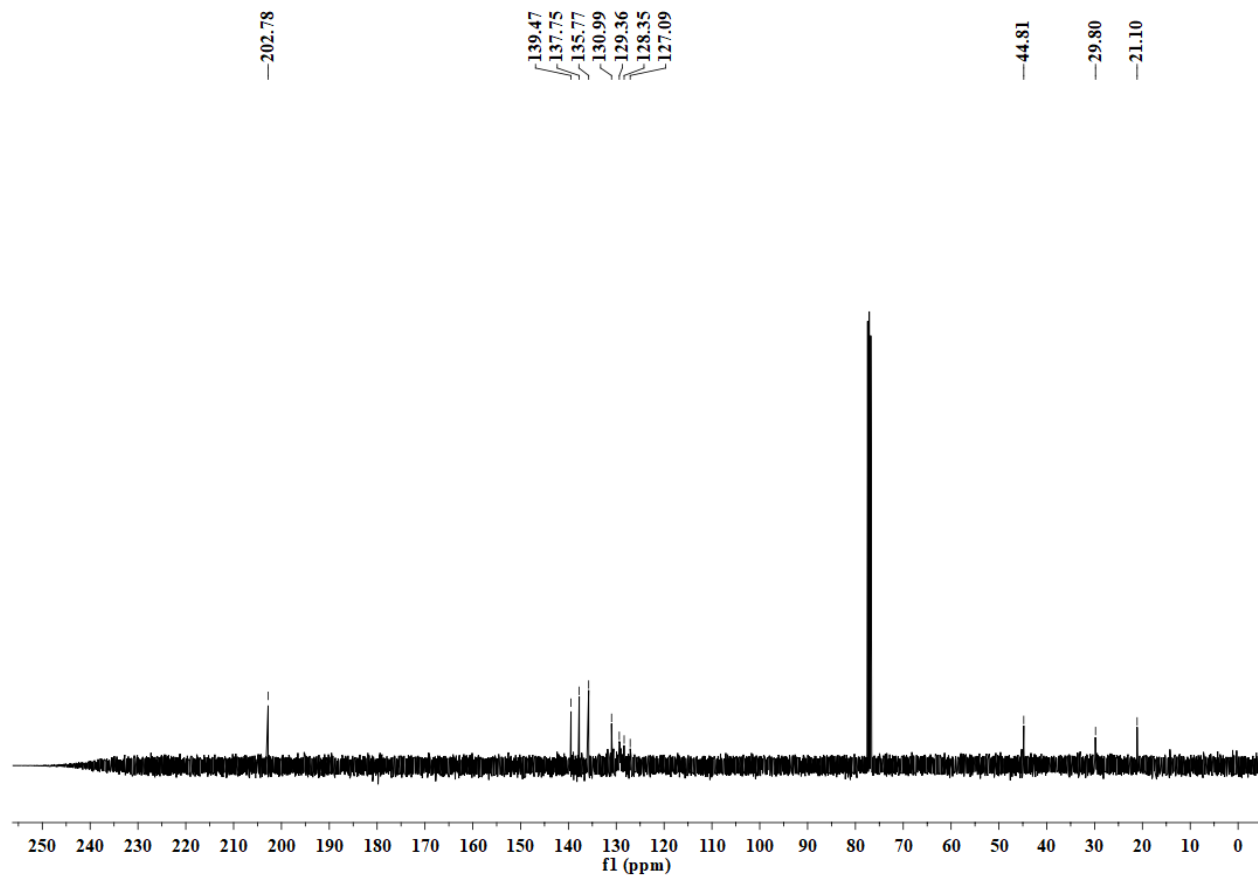

Figure S99. <sup>13</sup>C NMR spectrum of **5dg** taking CDCl<sub>3</sub> as solvent.

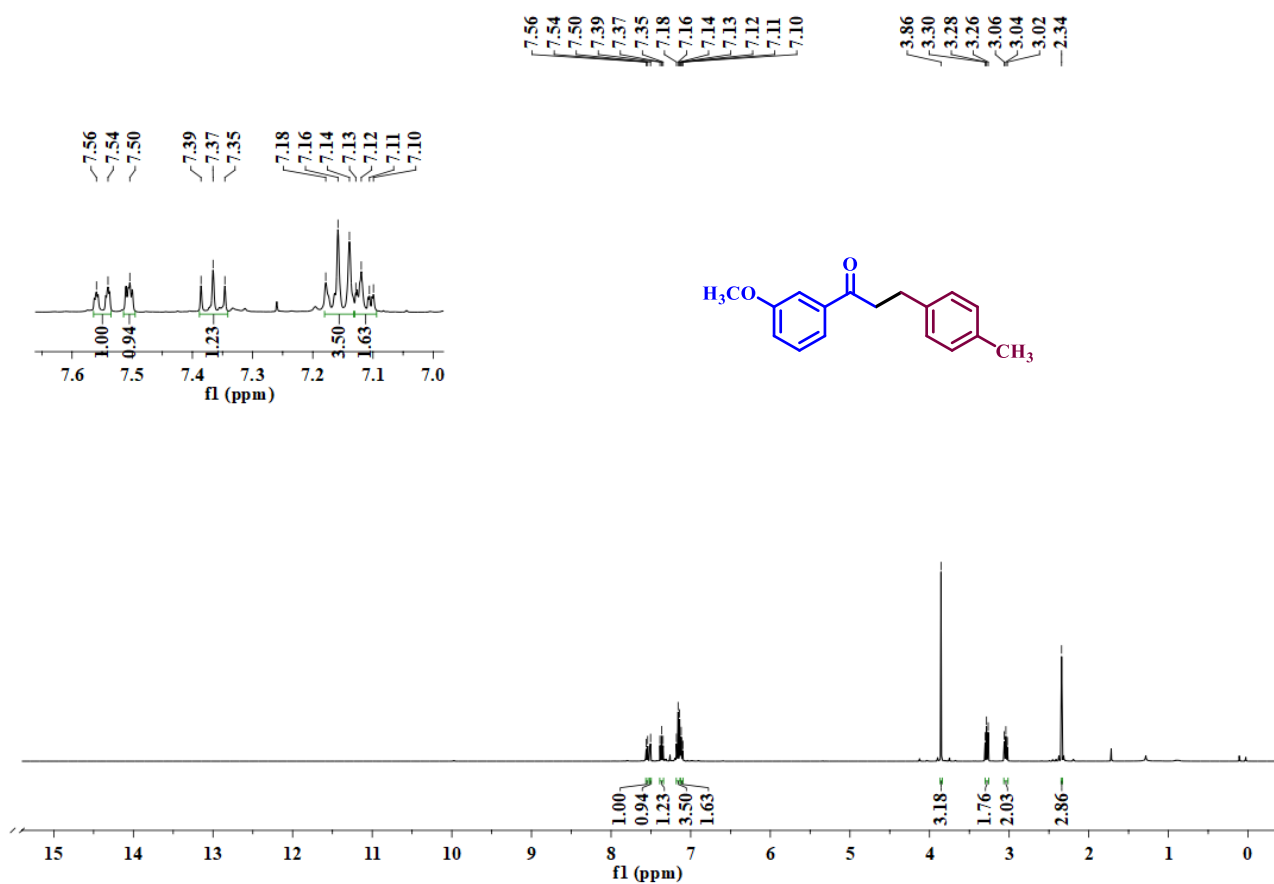

**Figure S100.** <sup>1</sup>H NMR spectrum of **5dh** taking CDCl<sub>3</sub> as solvent.

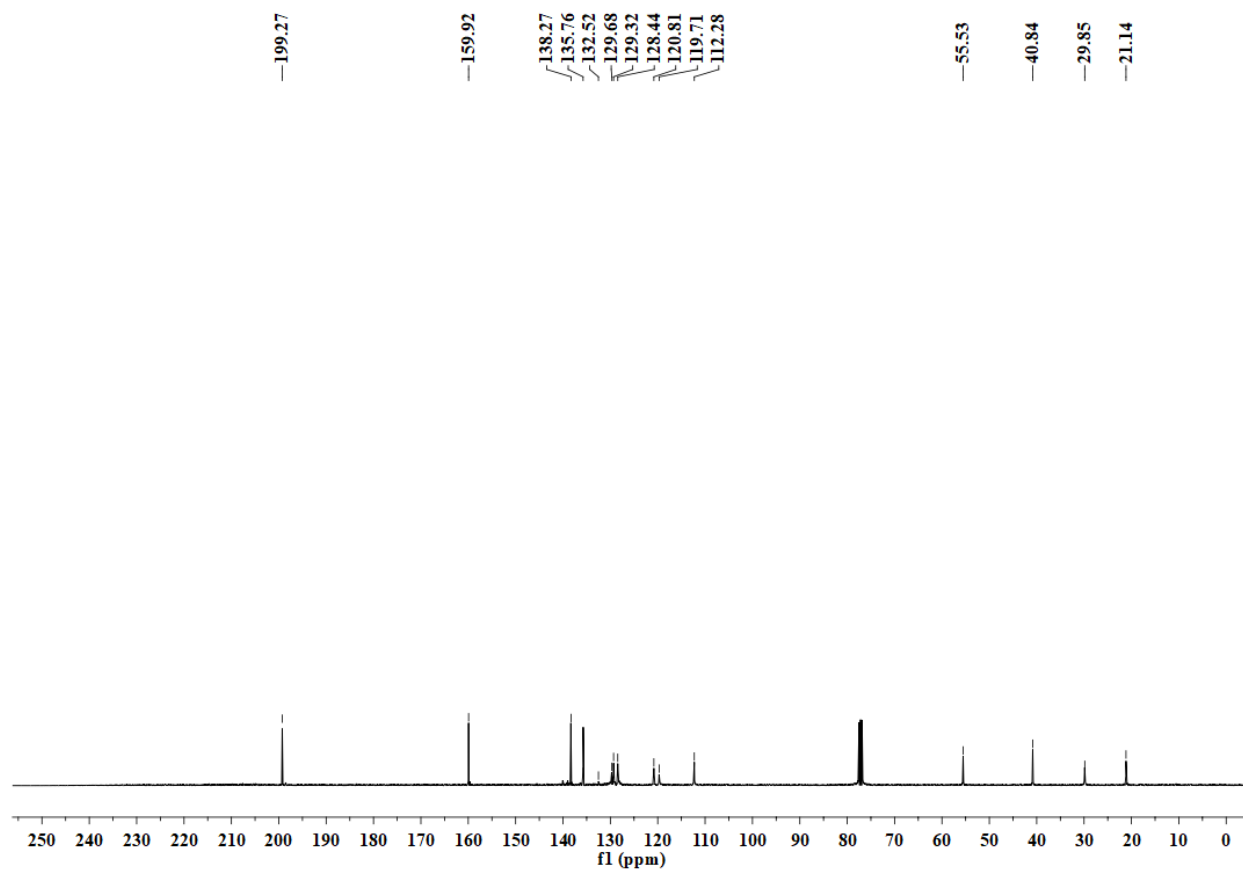

**Figure S101.** <sup>13</sup>C NMR spectrum of **5dh** taking CDCl<sub>3</sub> as solvent.

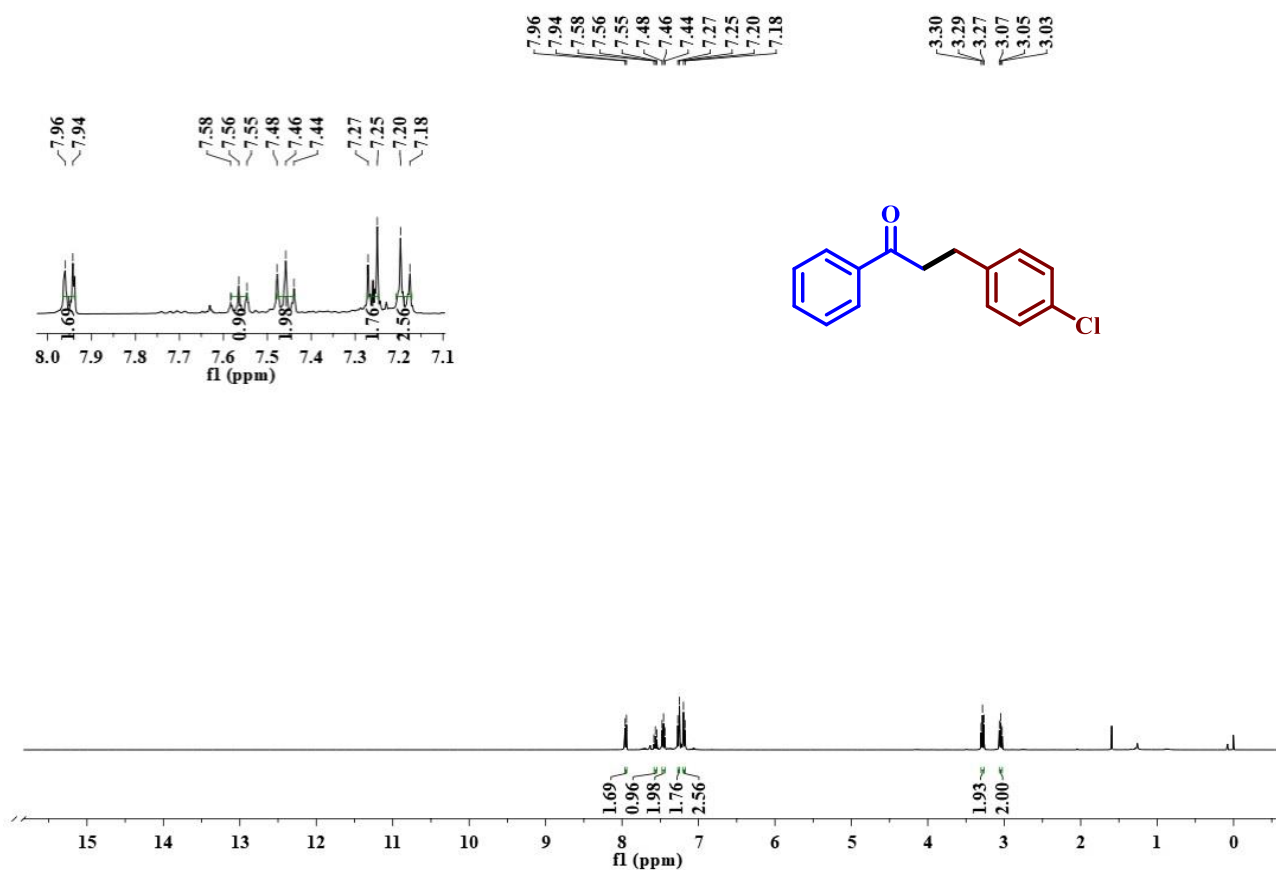

Figure S102. <sup>1</sup>H NMR spectrum of **5ea** taking CDCl<sub>3</sub> as solvent.

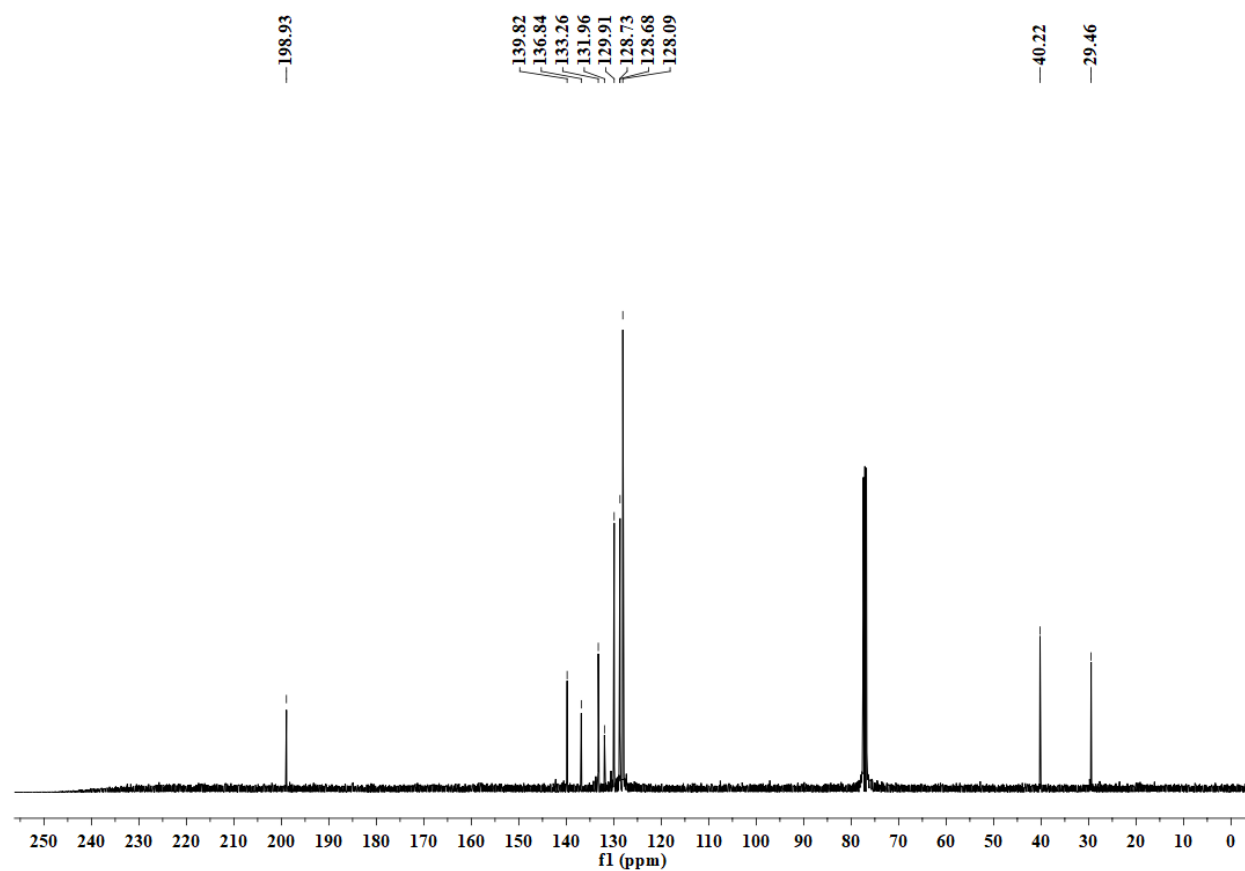

Figure S103. <sup>13</sup>C NMR spectrum of **5ea** taking CDCl<sub>3</sub> as solvent.

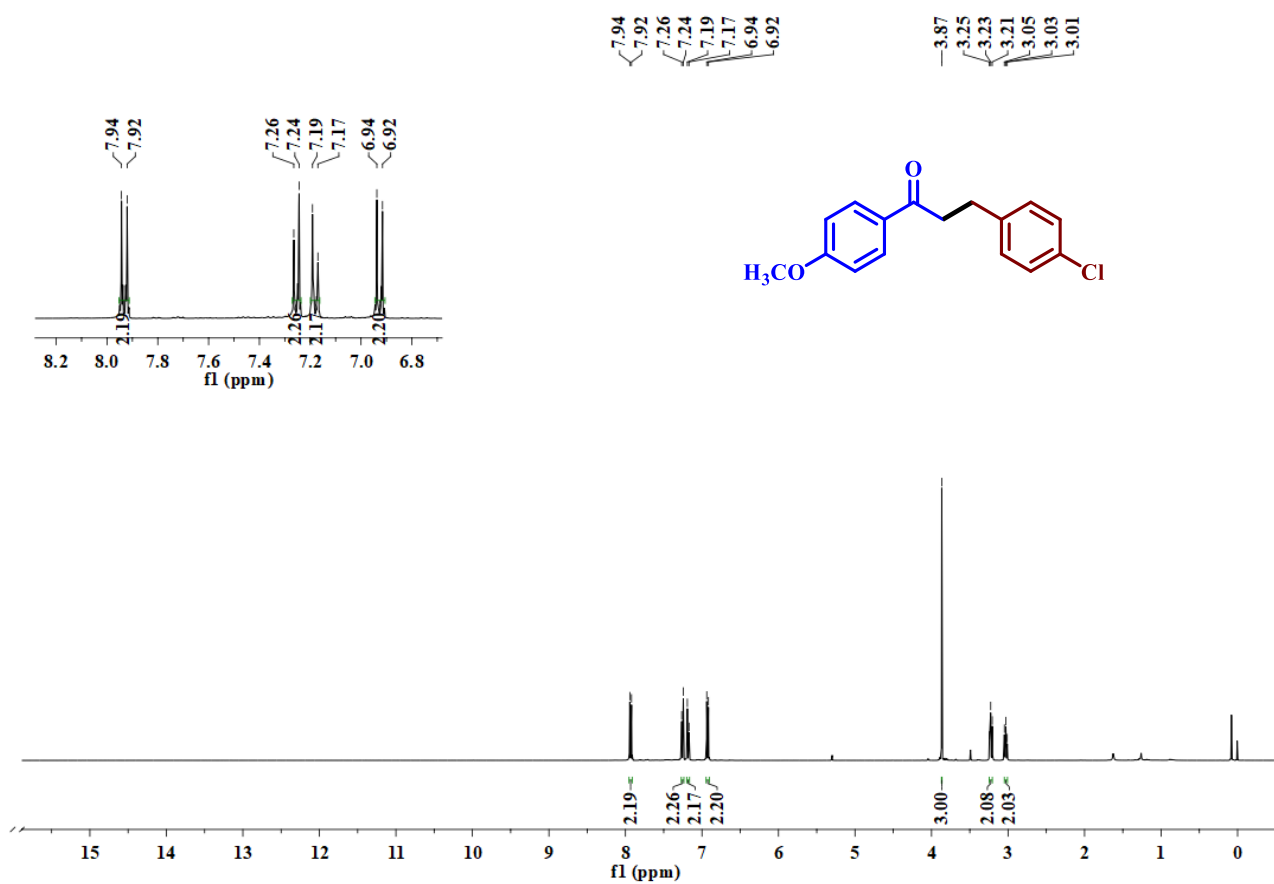

**Figure S104.** <sup>1</sup>H NMR spectrum of **5eb** taking CDCl<sub>3</sub> as solvent.

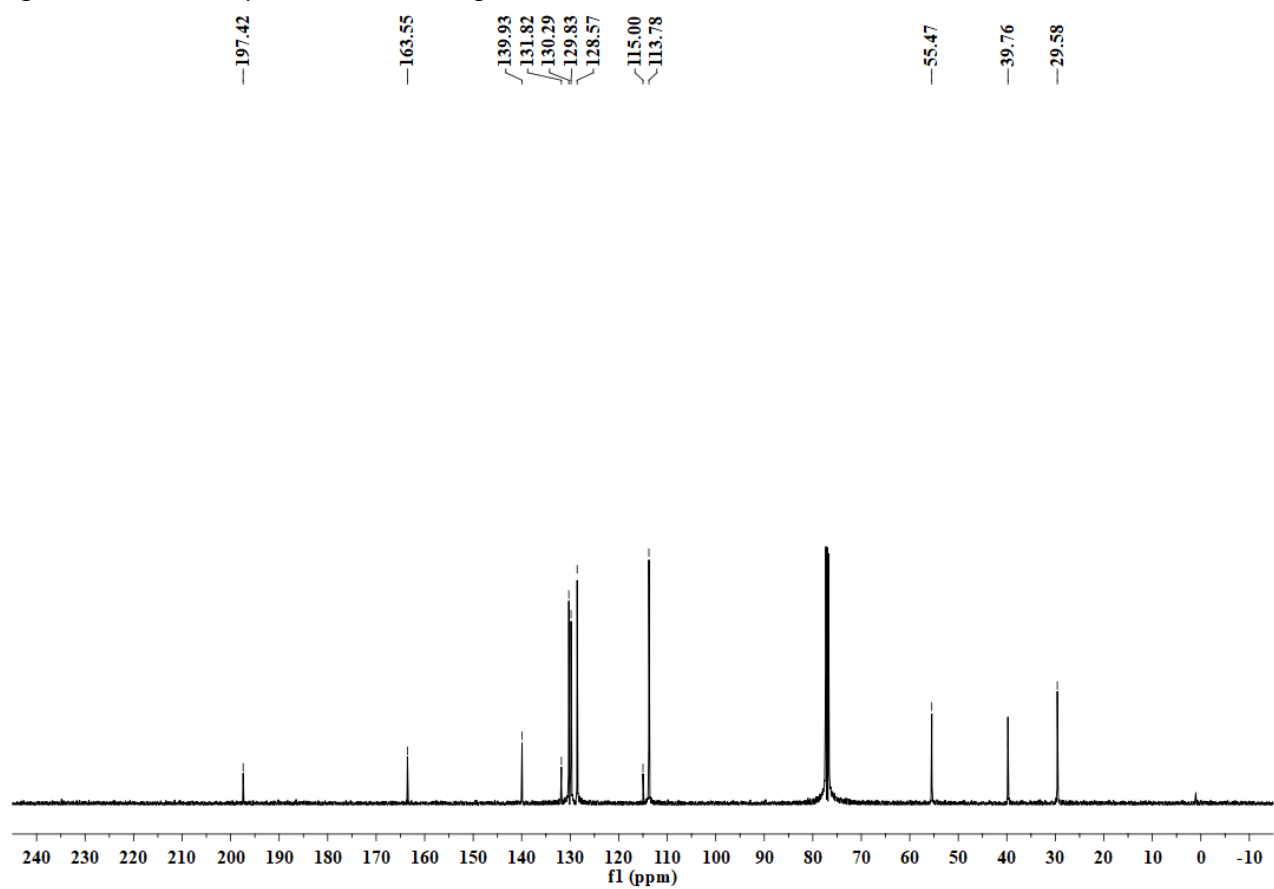

**Figure S105.** <sup>13</sup>C NMR spectrum of **5eb** taking CDCl<sub>3</sub> as solvent.



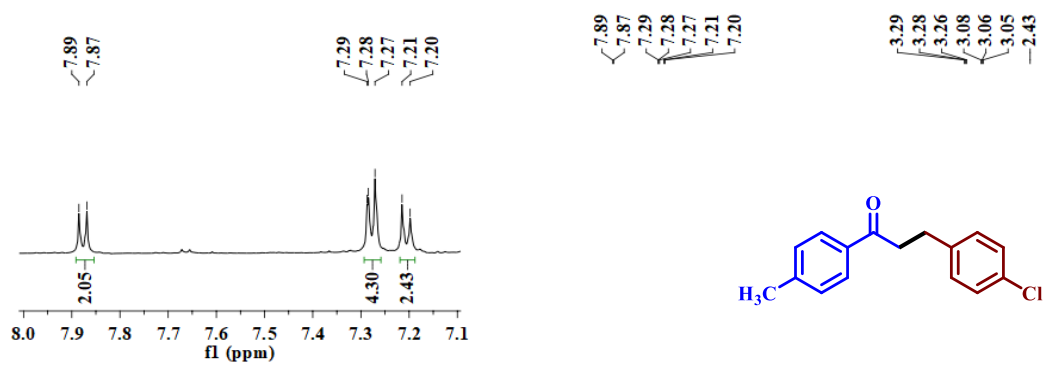

Figure S106. <sup>1</sup>H NMR spectrum of **5ec** taking CDCl<sub>3</sub> as solvent.

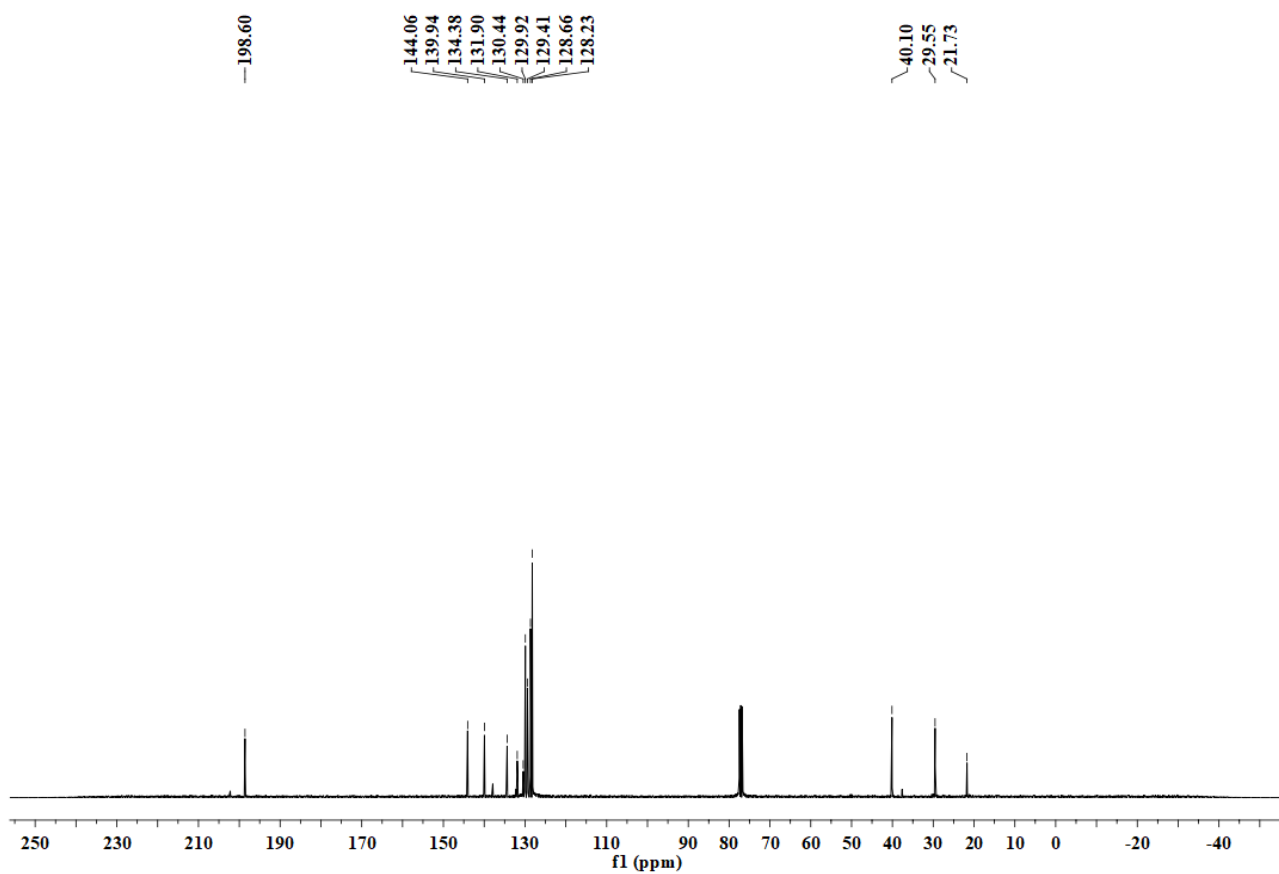

Figure S107. <sup>13</sup>C NMR spectrum of **5ec** taking CDCl<sub>3</sub> as solvent.

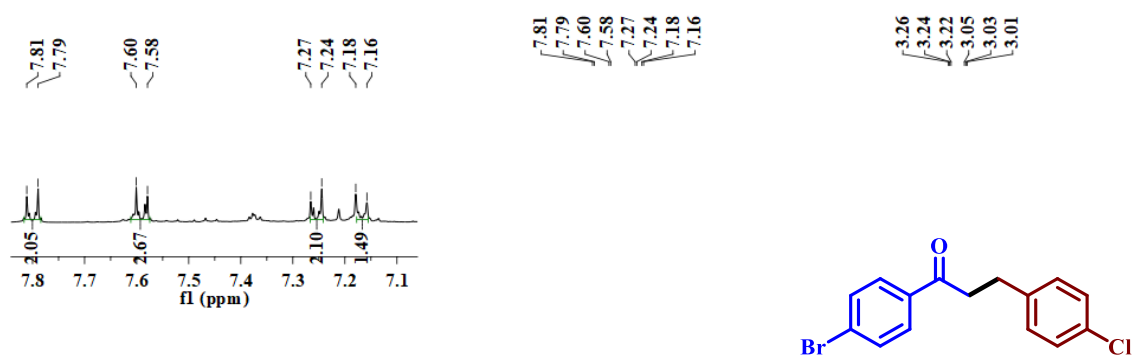

Figure S108. <sup>1</sup>H NMR spectrum of **5ed** taking CDCl<sub>3</sub> as solvent.

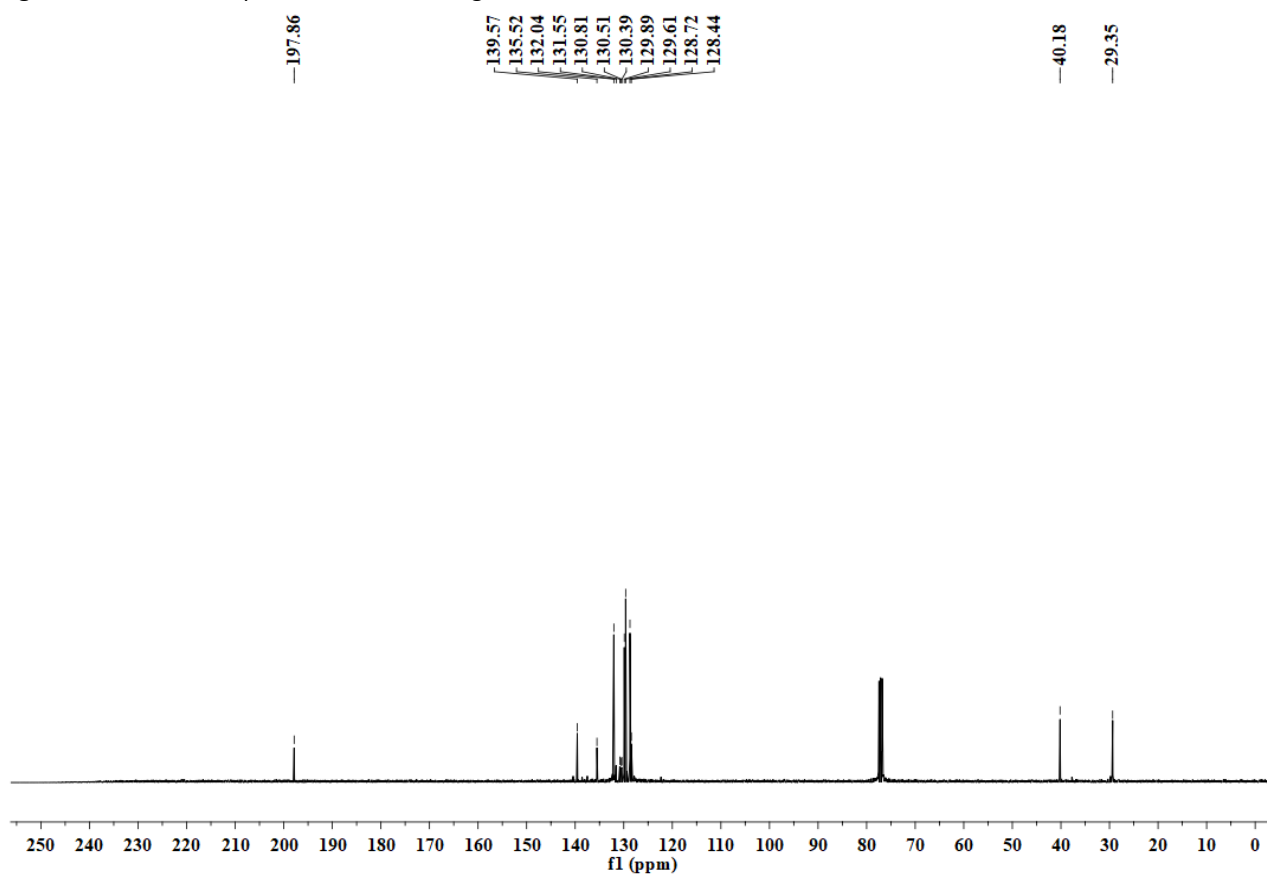

Figure S109. <sup>13</sup>C NMR spectrum of **5ed** taking CDCl<sub>3</sub> as solvent.

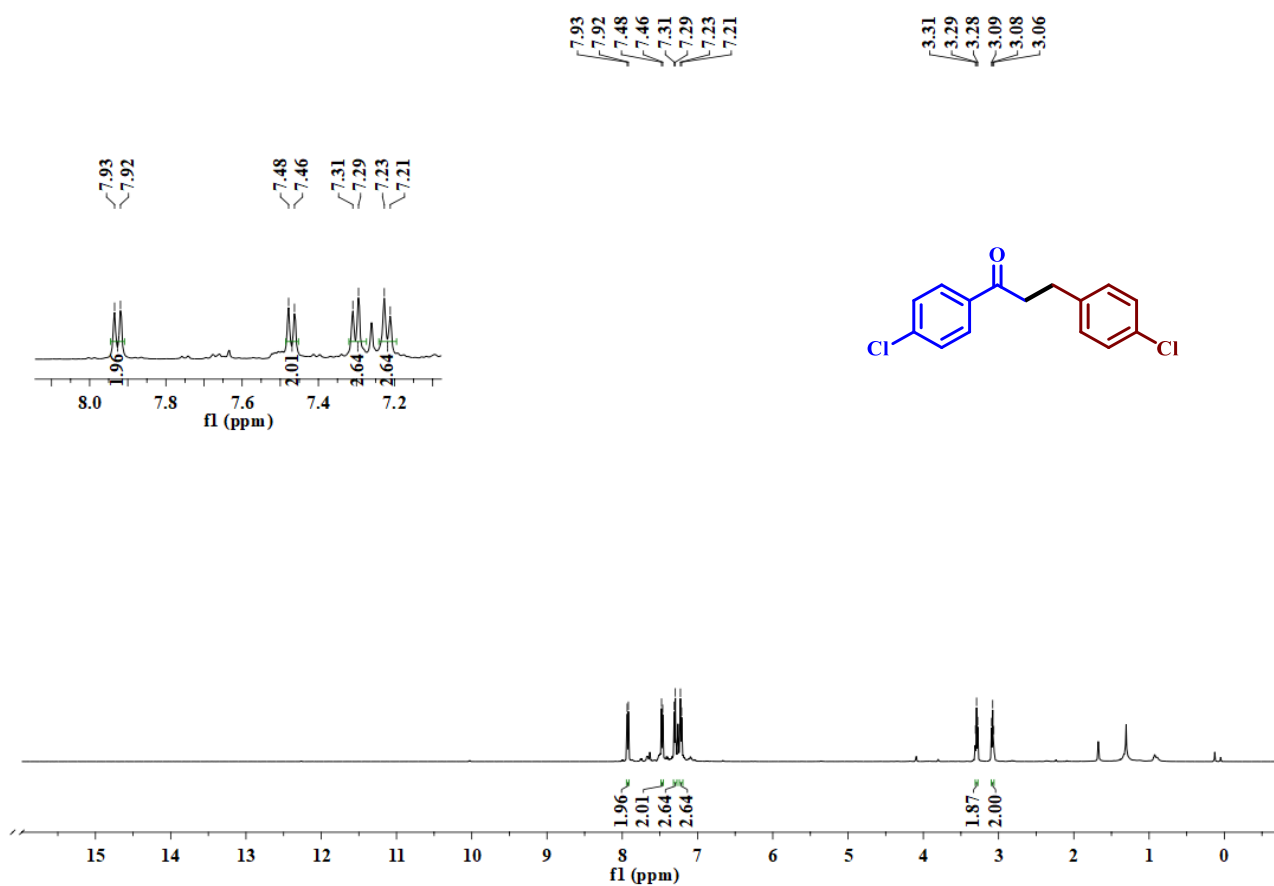

**Figure S110.** <sup>1</sup>H NMR spectrum of **5ee** taking CDCl<sub>3</sub> as solvent.

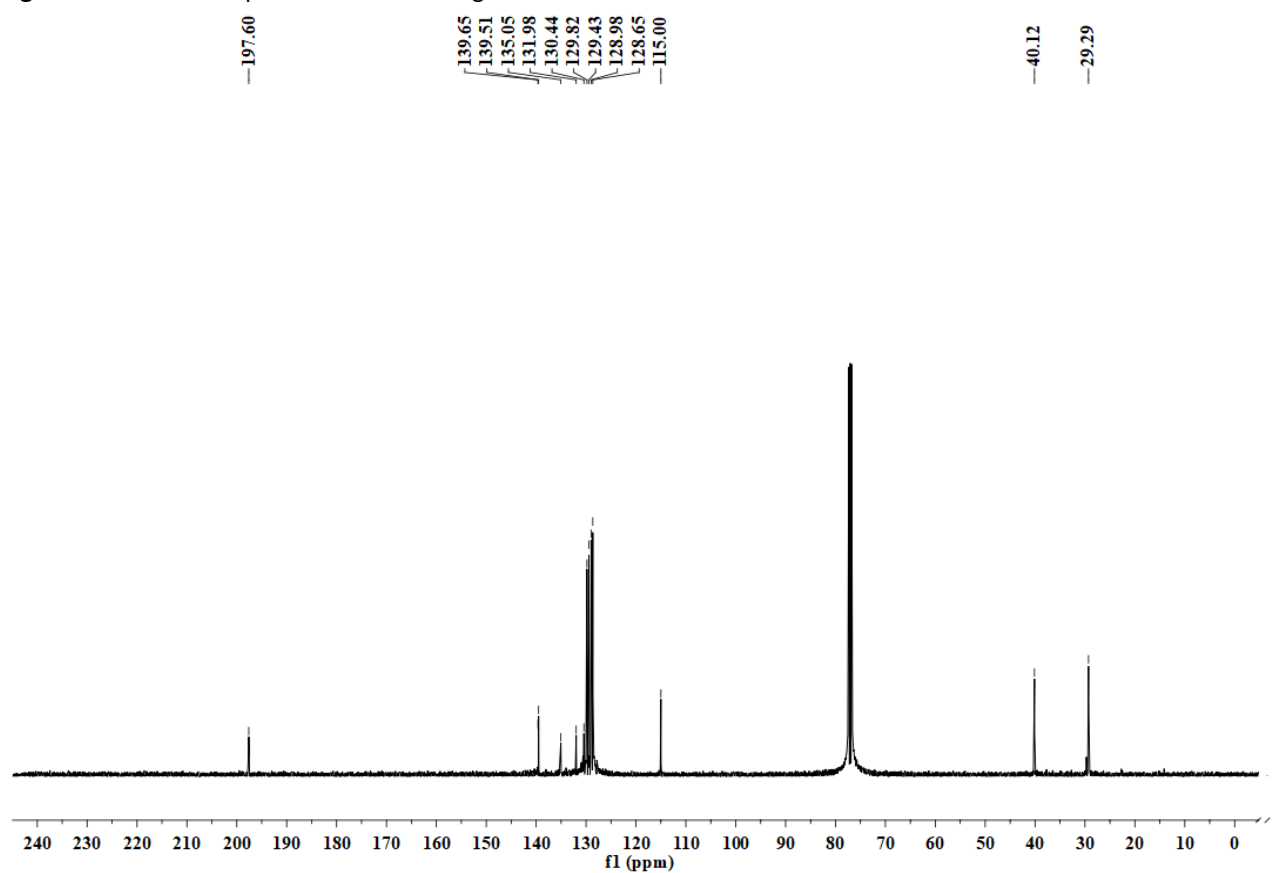

**Figure S111.** <sup>13</sup>C NMR spectrum of **5ee** taking CDCl<sub>3</sub> as solvent.

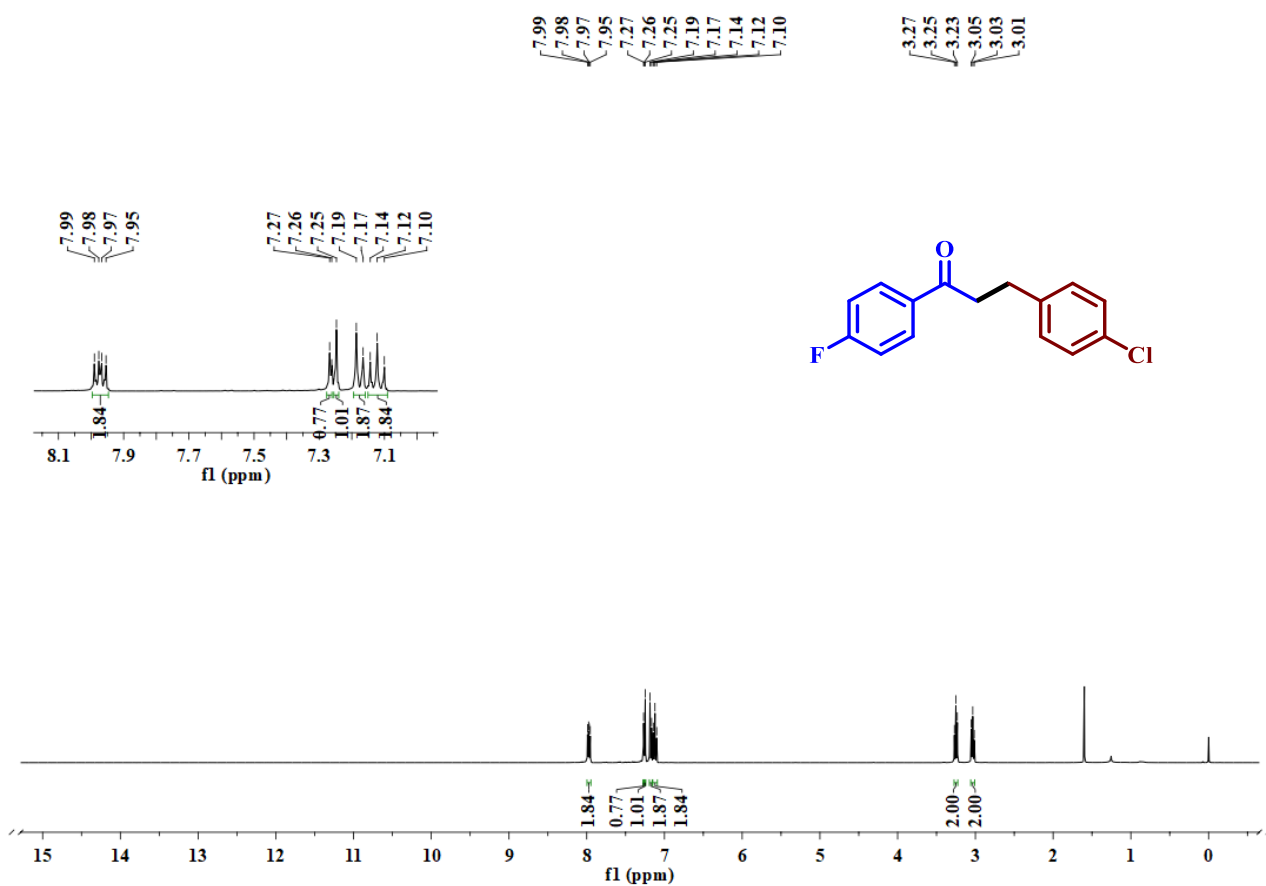

**Figure S112.** <sup>1</sup>H NMR spectrum of **5ef** taking CDCl<sub>3</sub> as solvent.

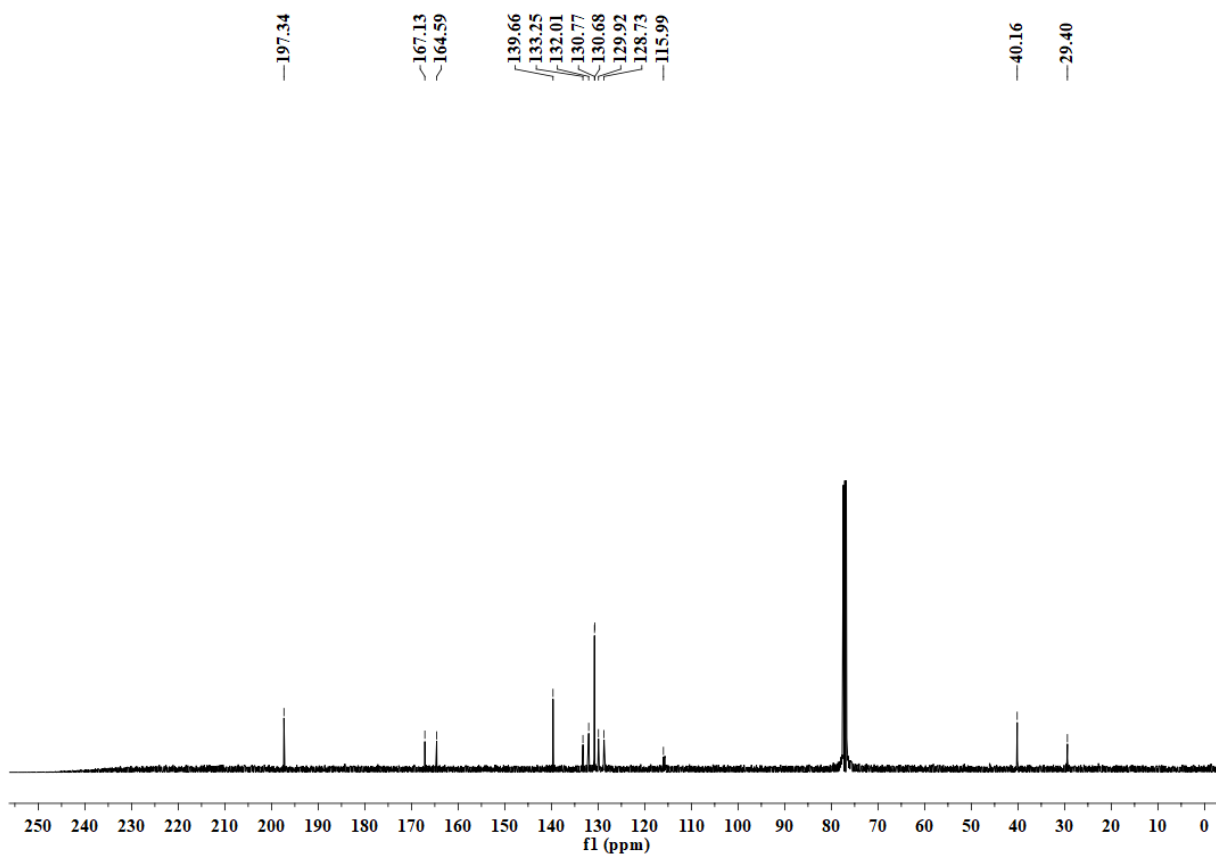

**Figure S113.** <sup>13</sup>C NMR spectrum of **5ef** taking CDCl<sub>3</sub> as solvent.

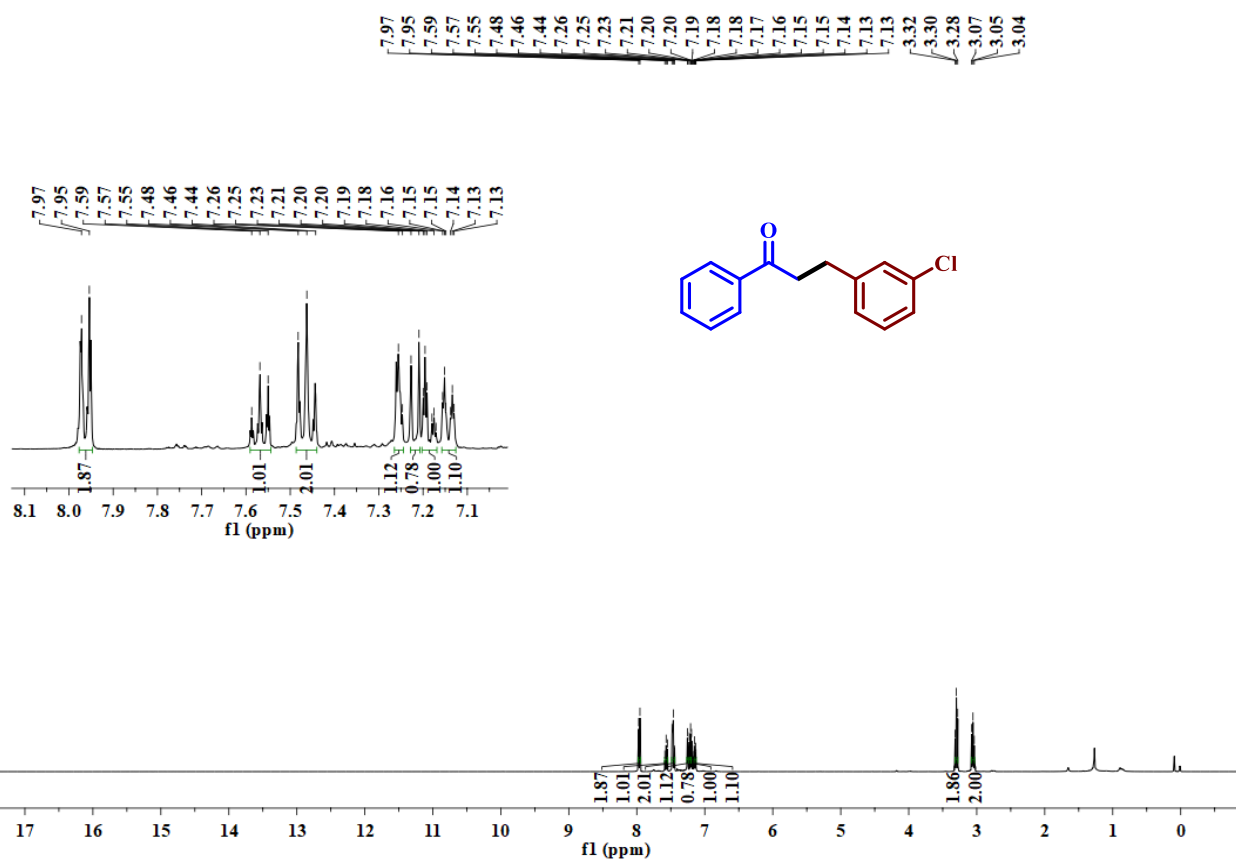

Figure S114. <sup>1</sup>H NMR spectrum of **5fa** taking CDCl<sub>3</sub> as solvent.

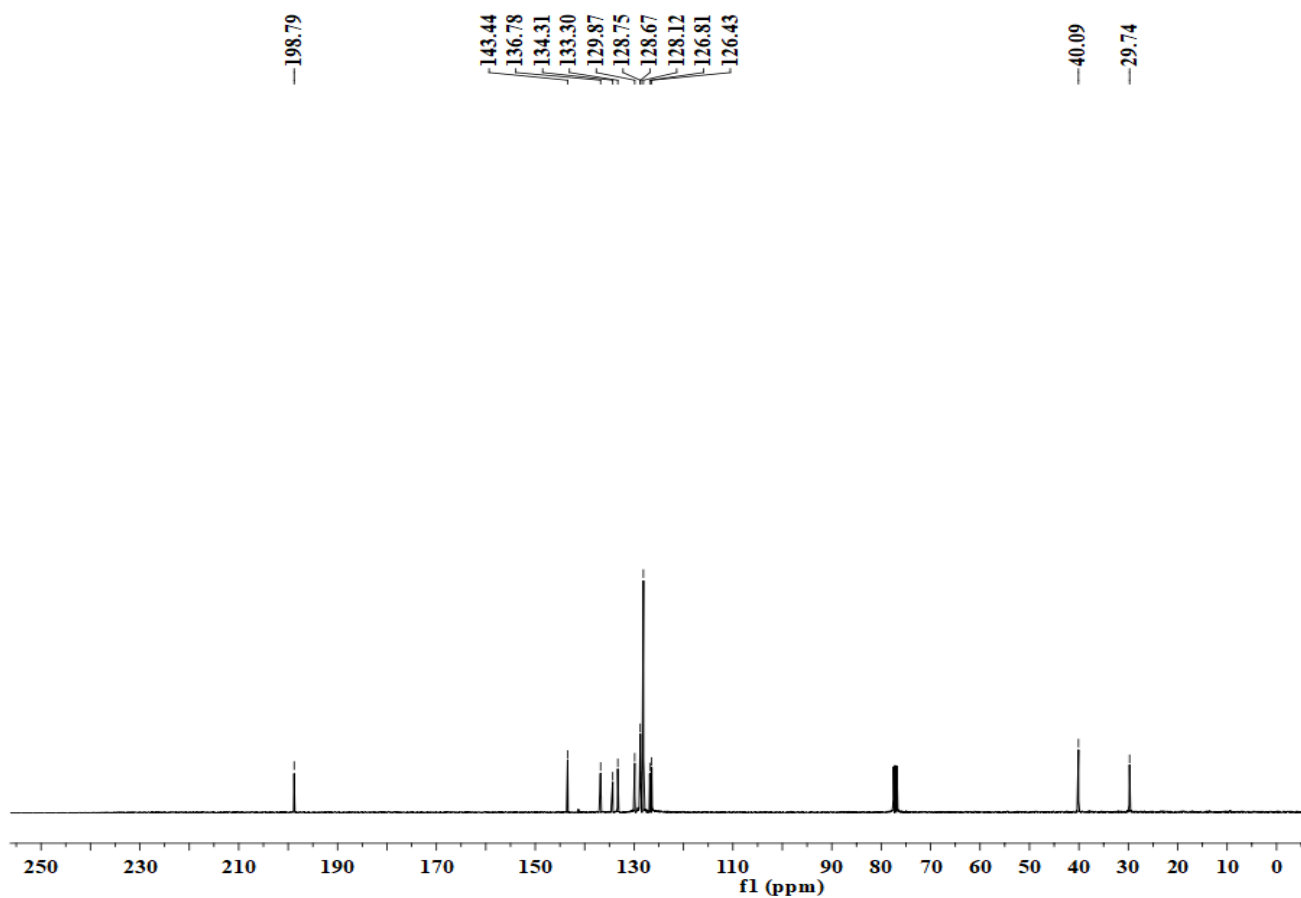

Figure S115. <sup>13</sup>C NMR spectrum of **5fa** taking CDCl<sub>3</sub> as solvent.

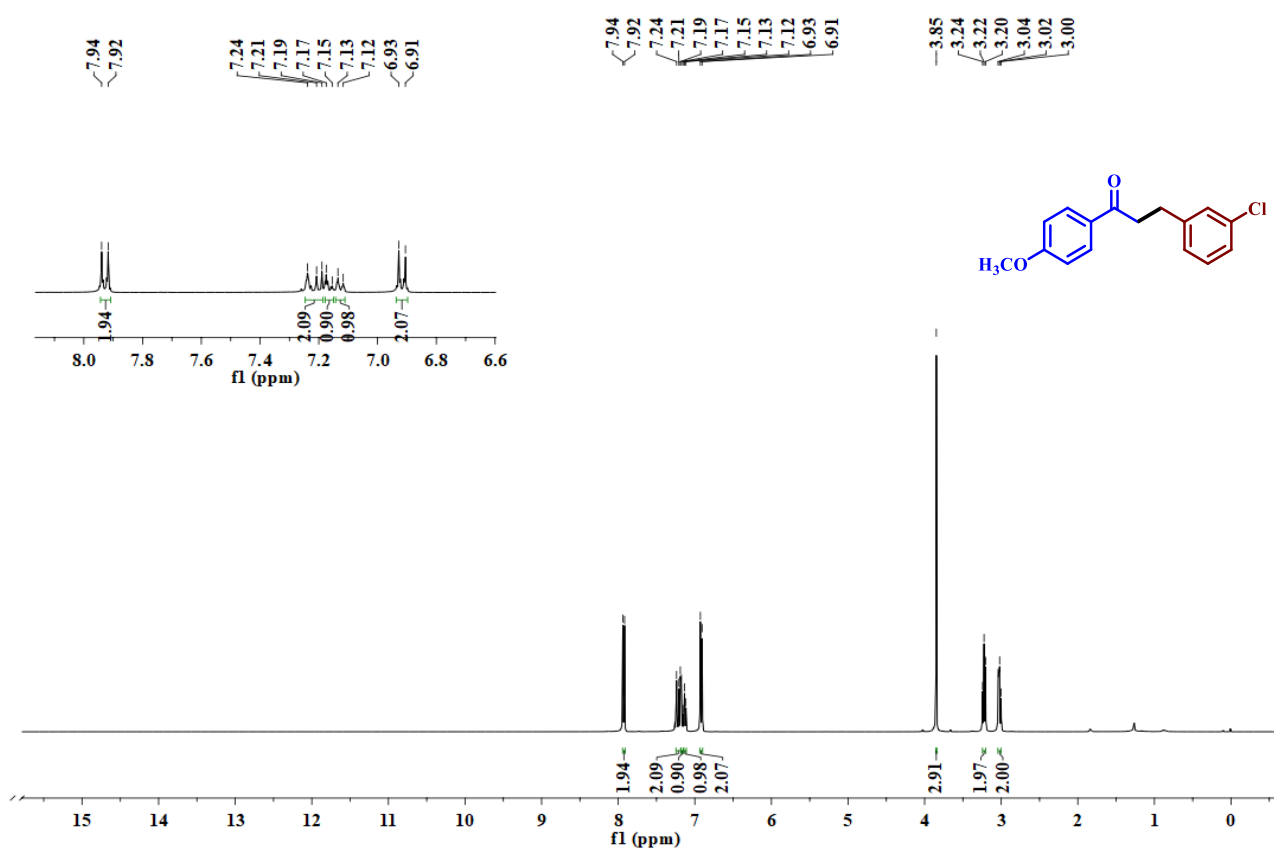

**Figure S116.** <sup>1</sup>H NMR spectrum of **5fb** taking CDCl<sub>3</sub> as solvent.

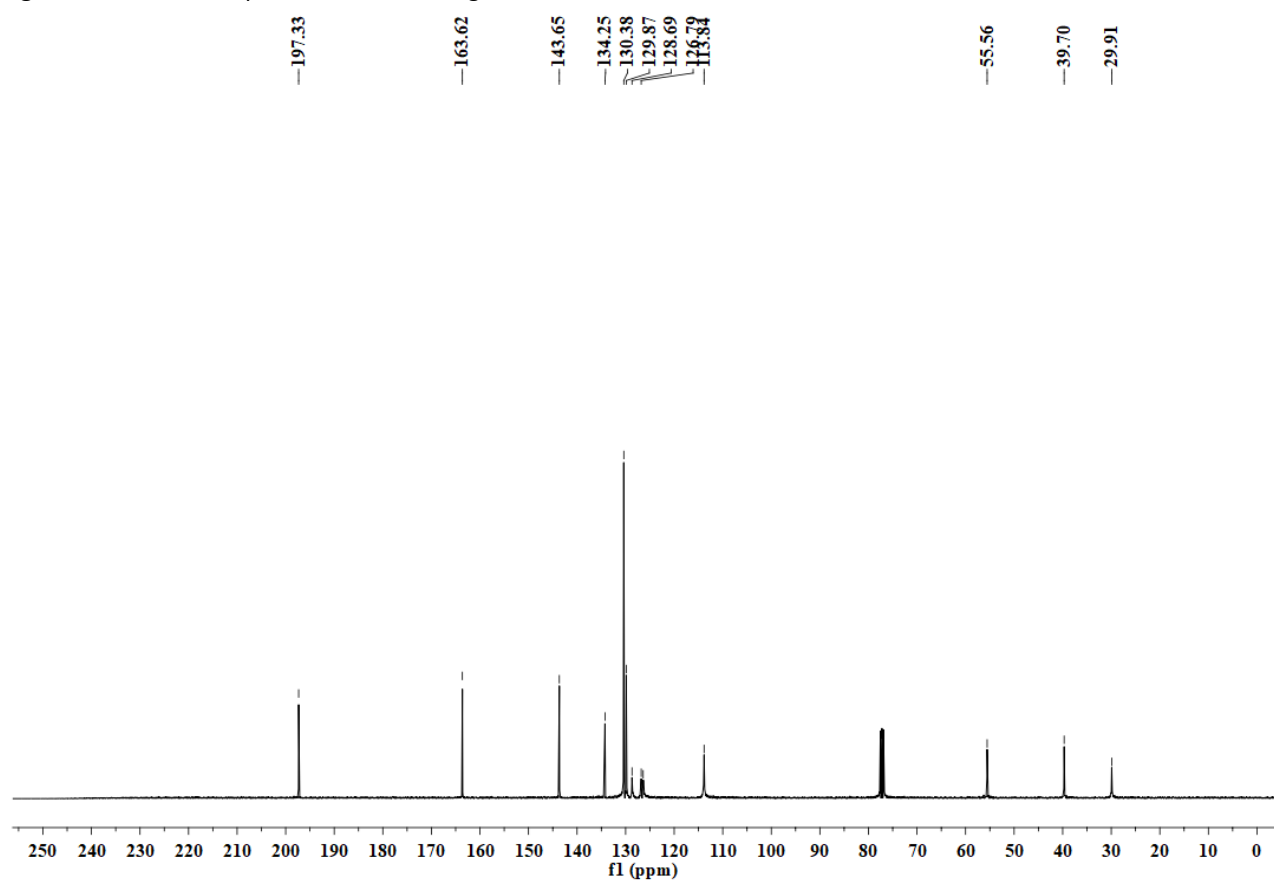

**Figure S117.** <sup>13</sup>C NMR spectrum of **5fb** taking CDCl<sub>3</sub> as solvent.

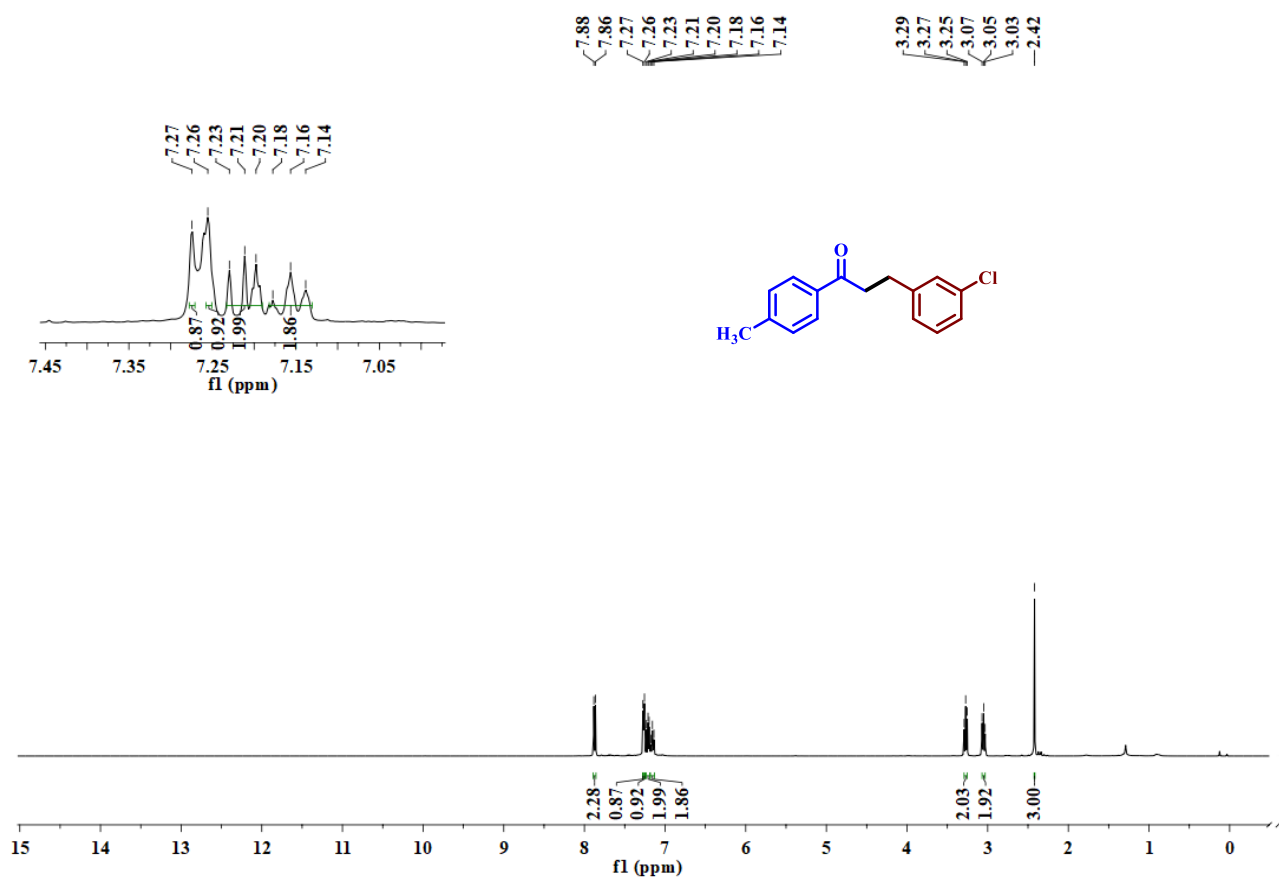

**Figure S118.** <sup>1</sup>H NMR spectrum of **5fc** taking CDCl<sub>3</sub> as solvent.

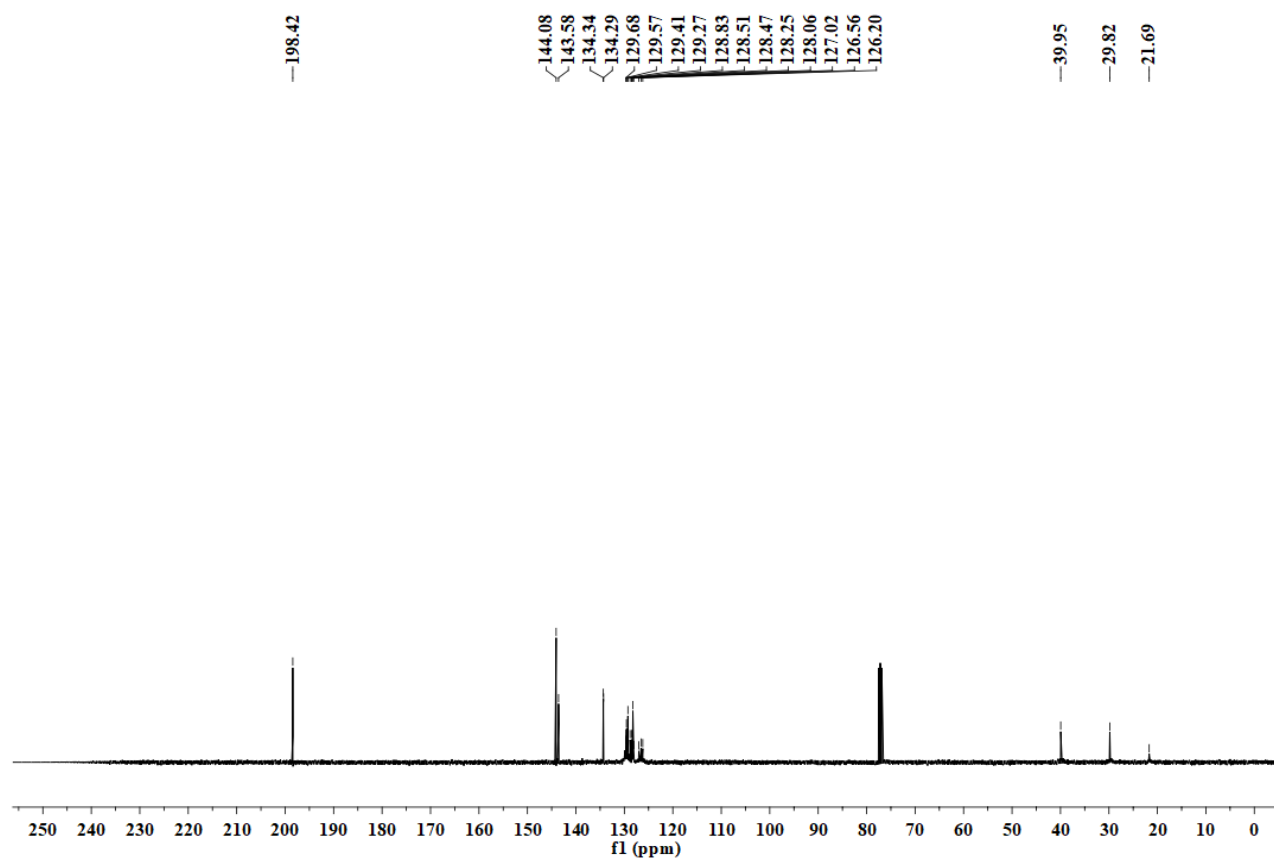

**Figure S119.** <sup>13</sup>C NMR spectrum of **5fc** taking CDCl<sub>3</sub> as solvent.

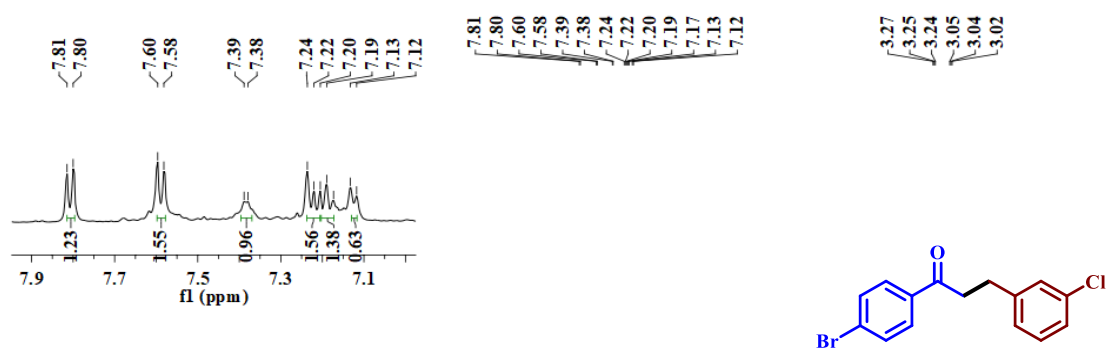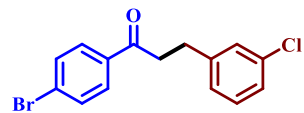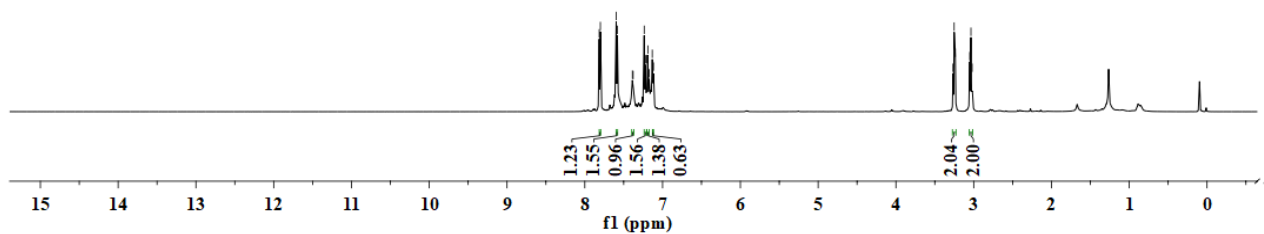

Figure S120. <sup>1</sup>H NMR spectrum of **5fd** taking CDCl<sub>3</sub> as solvent.

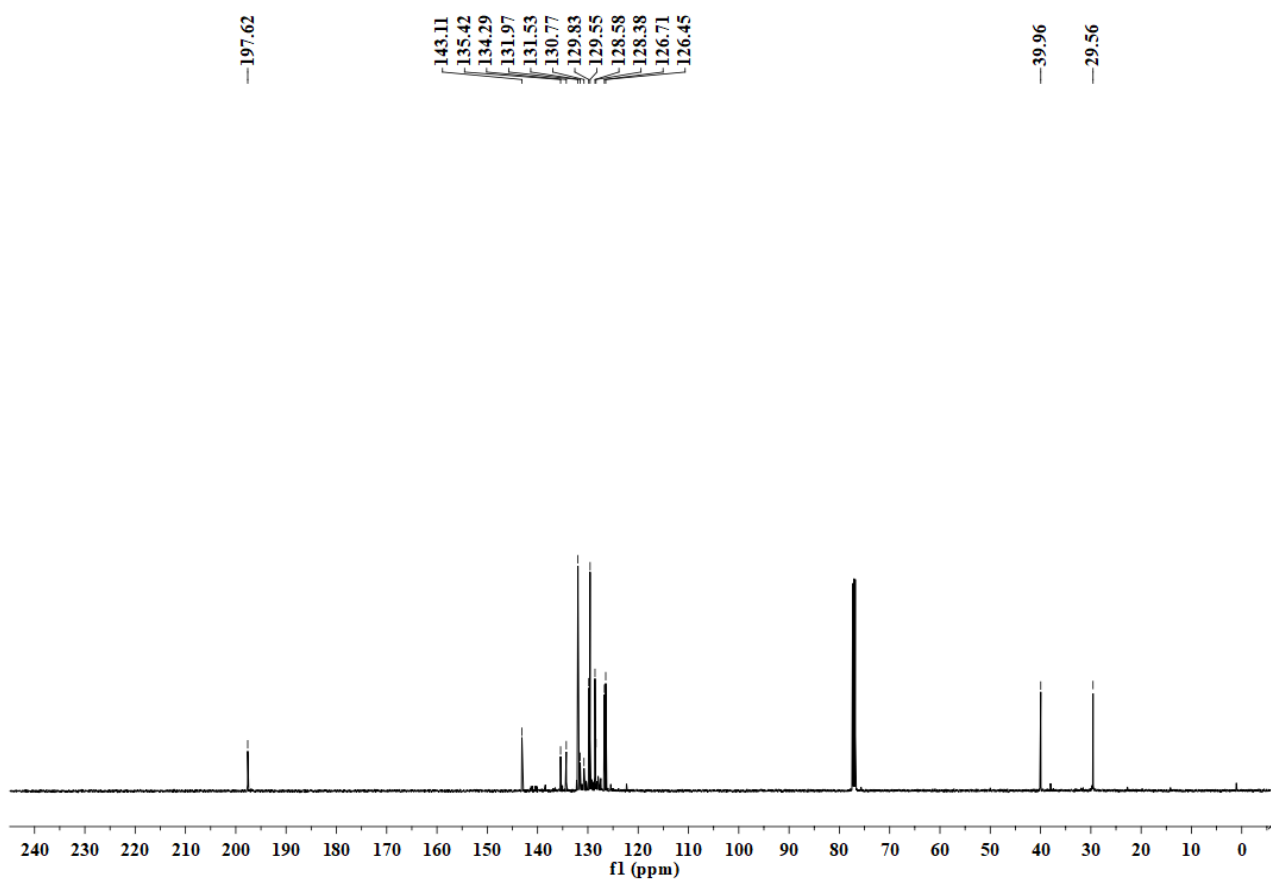

Figure S121. <sup>13</sup>C NMR spectrum of **5fd** taking CDCl<sub>3</sub> as solvent.



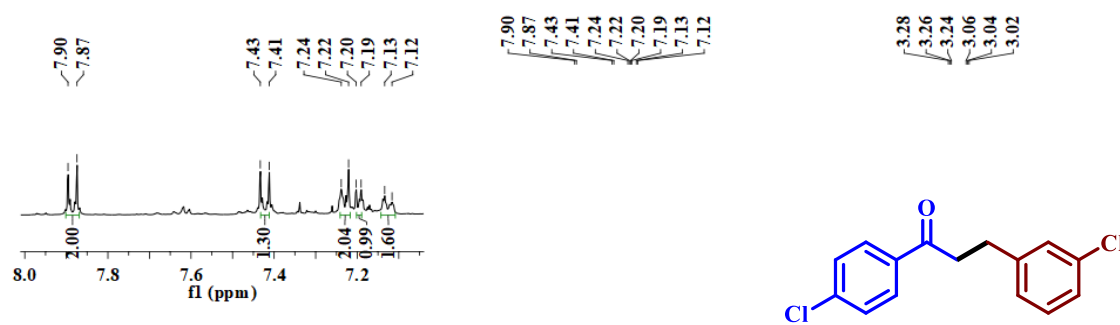

**Figure S122.** <sup>1</sup>H NMR spectrum of **5fe** taking CDCl<sub>3</sub> as solvent.

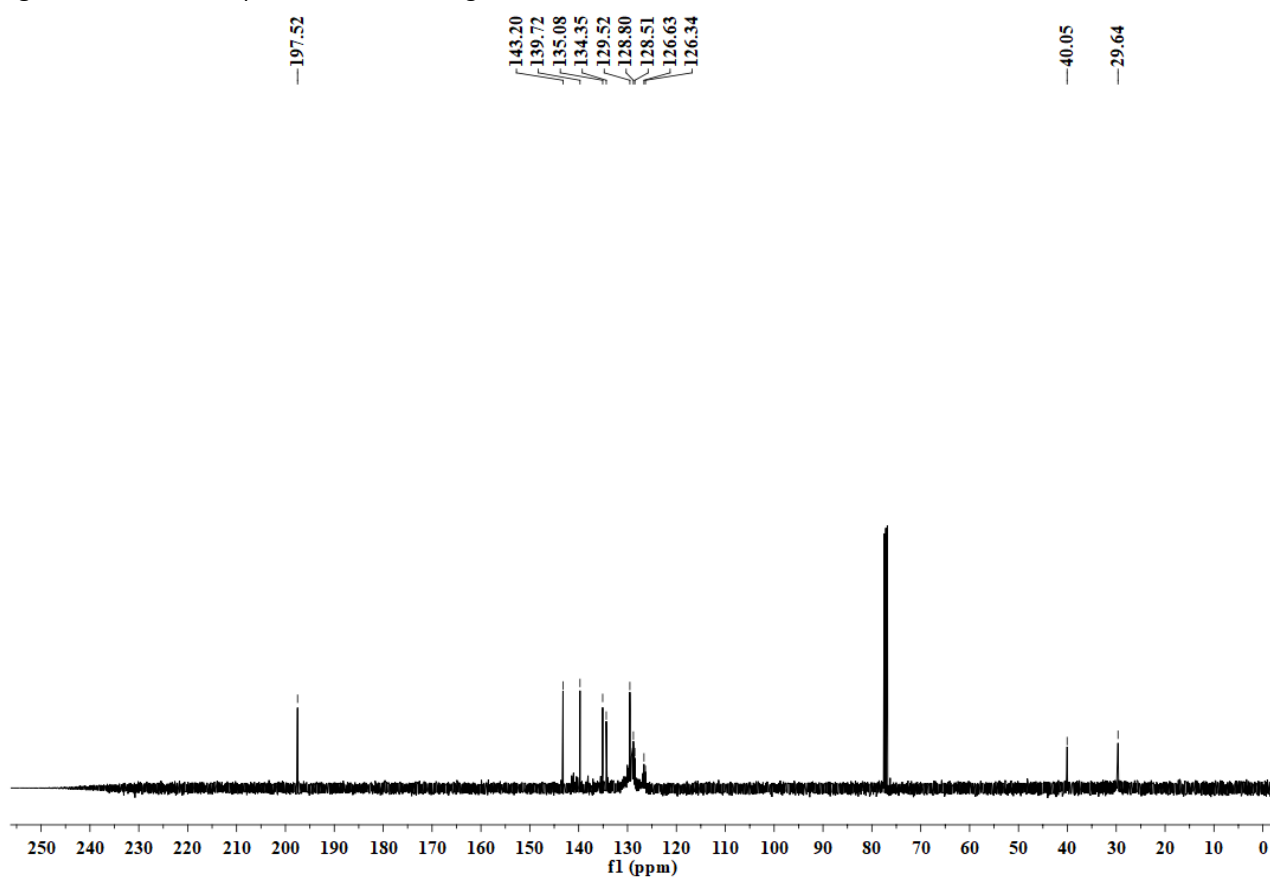

**Figure S123.** <sup>13</sup>C NMR spectrum of **5fe** taking CDCl<sub>3</sub> as solvent.

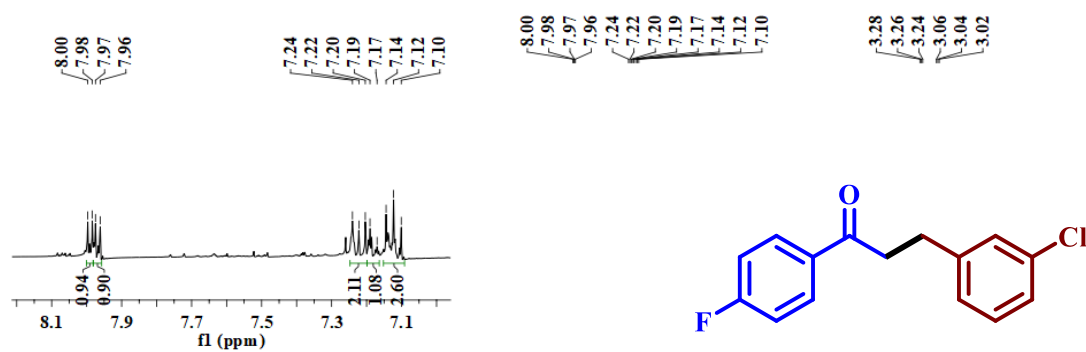

Figure S124. <sup>1</sup>H NMR spectrum of **5ff** taking CDCl<sub>3</sub> as solvent.

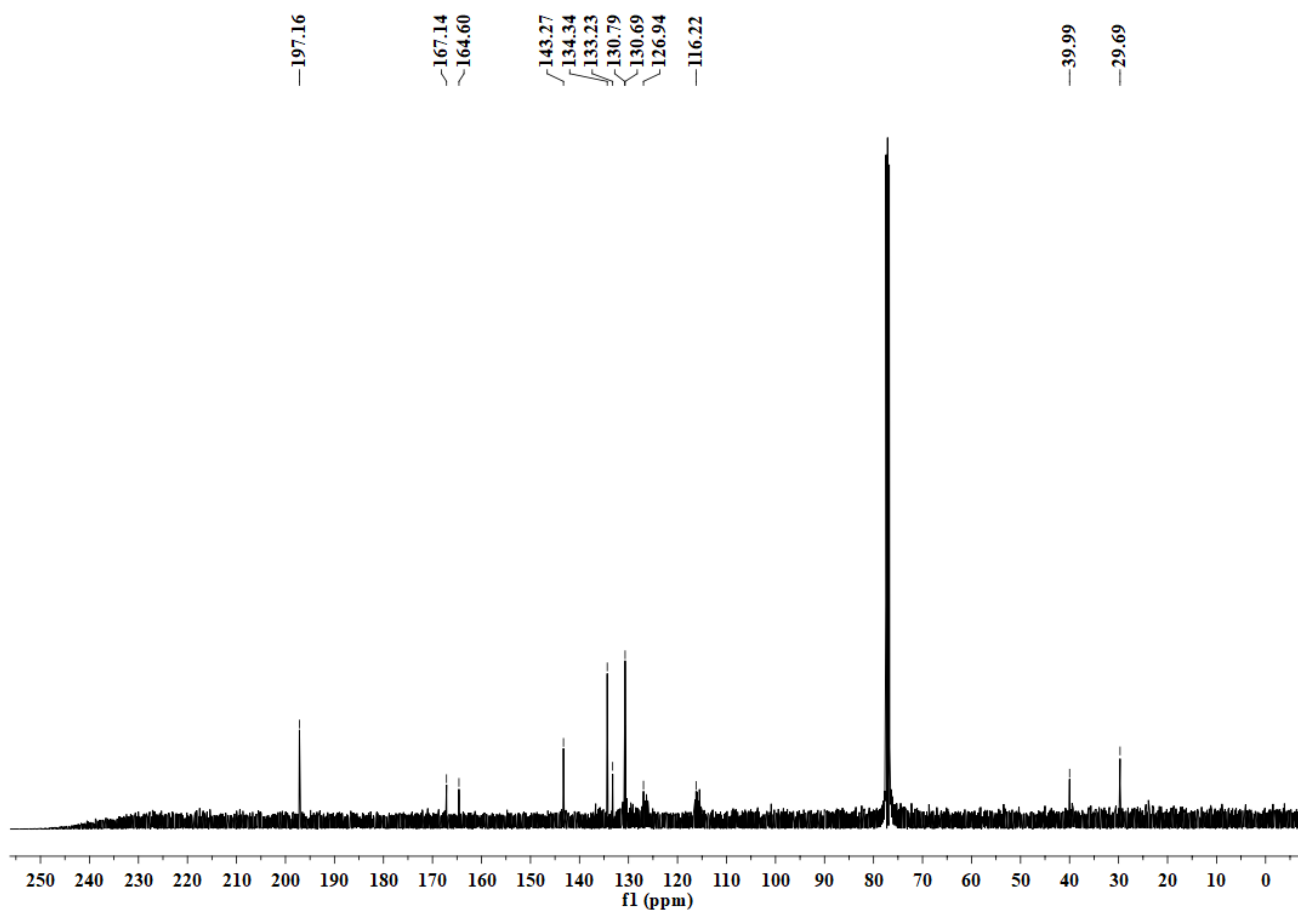

Figure S125. <sup>13</sup>C NMR spectrum of **5ff** taking CDCl<sub>3</sub> as solvent.

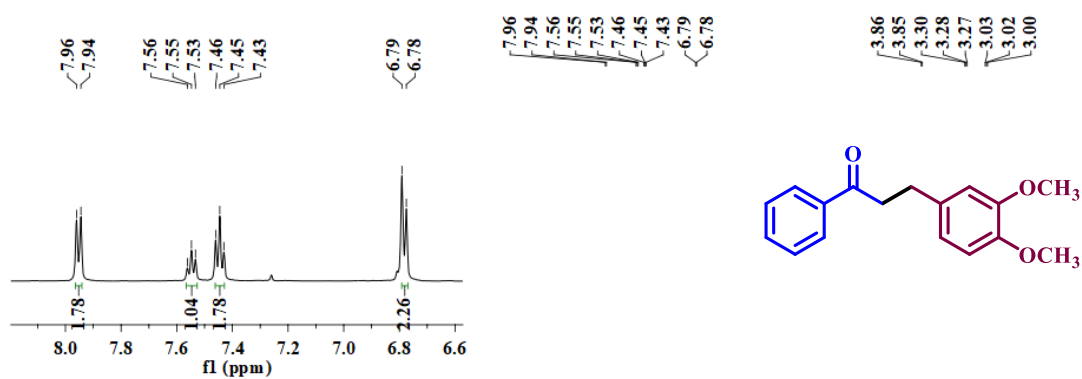

Figure S126. <sup>1</sup>H NMR spectrum of **5ga** taking CDCl<sub>3</sub> as solvent.

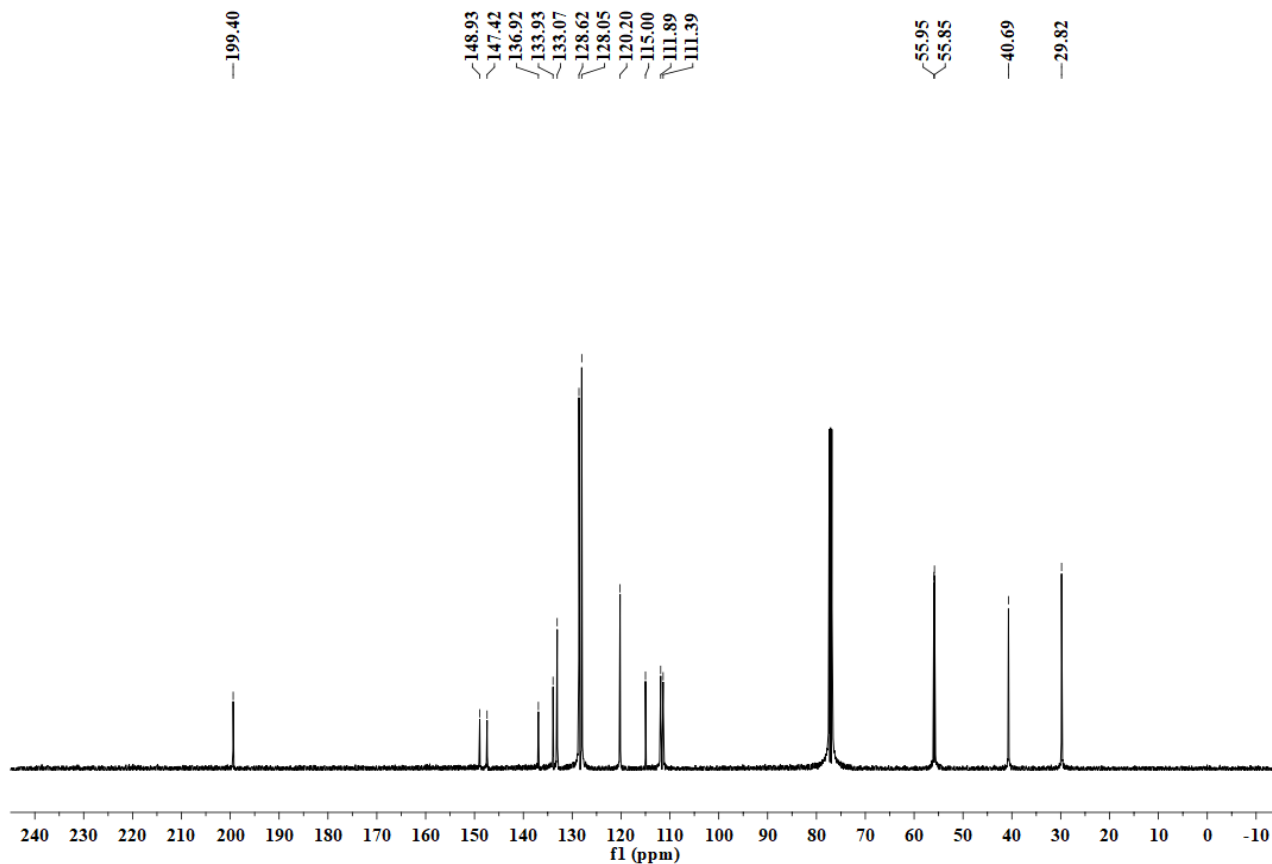

Figure S127. <sup>13</sup>C NMR spectrum of **5ga** taking CDCl<sub>3</sub> as solvent.

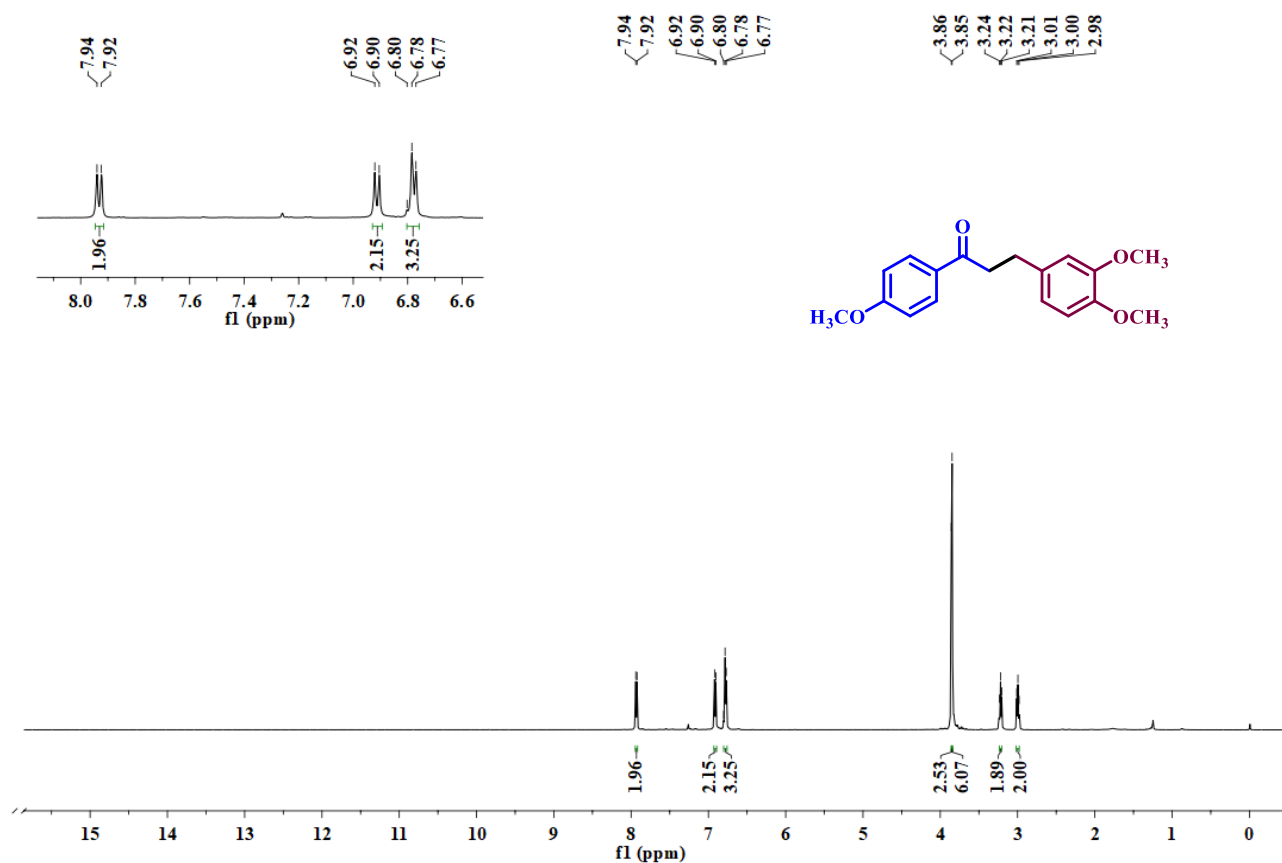

Figure S128. <sup>1</sup>H NMR spectrum of **5gb** taking CDCl<sub>3</sub> as solvent.

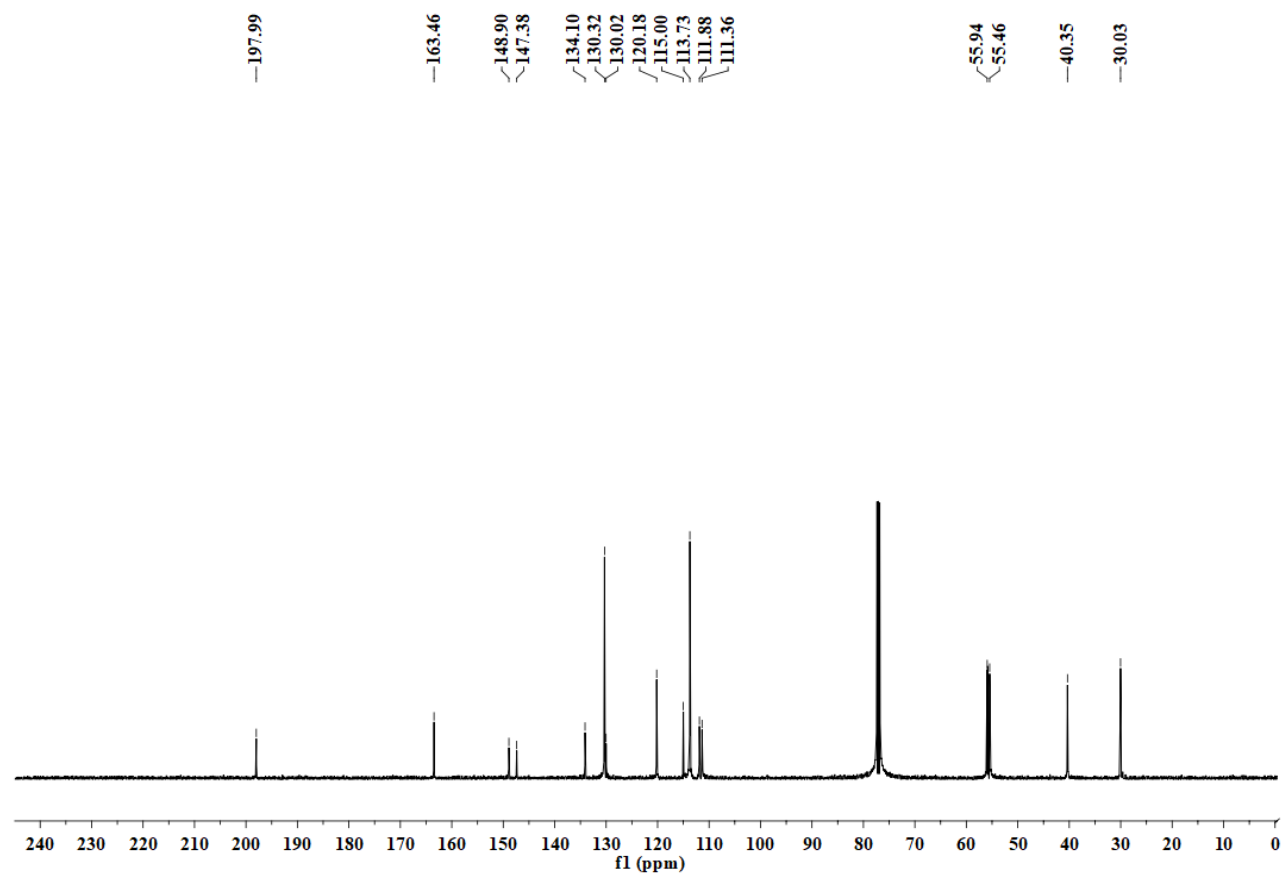

Figure S129. <sup>13</sup>C NMR spectrum of **5gb** taking CDCl<sub>3</sub> as solvent.

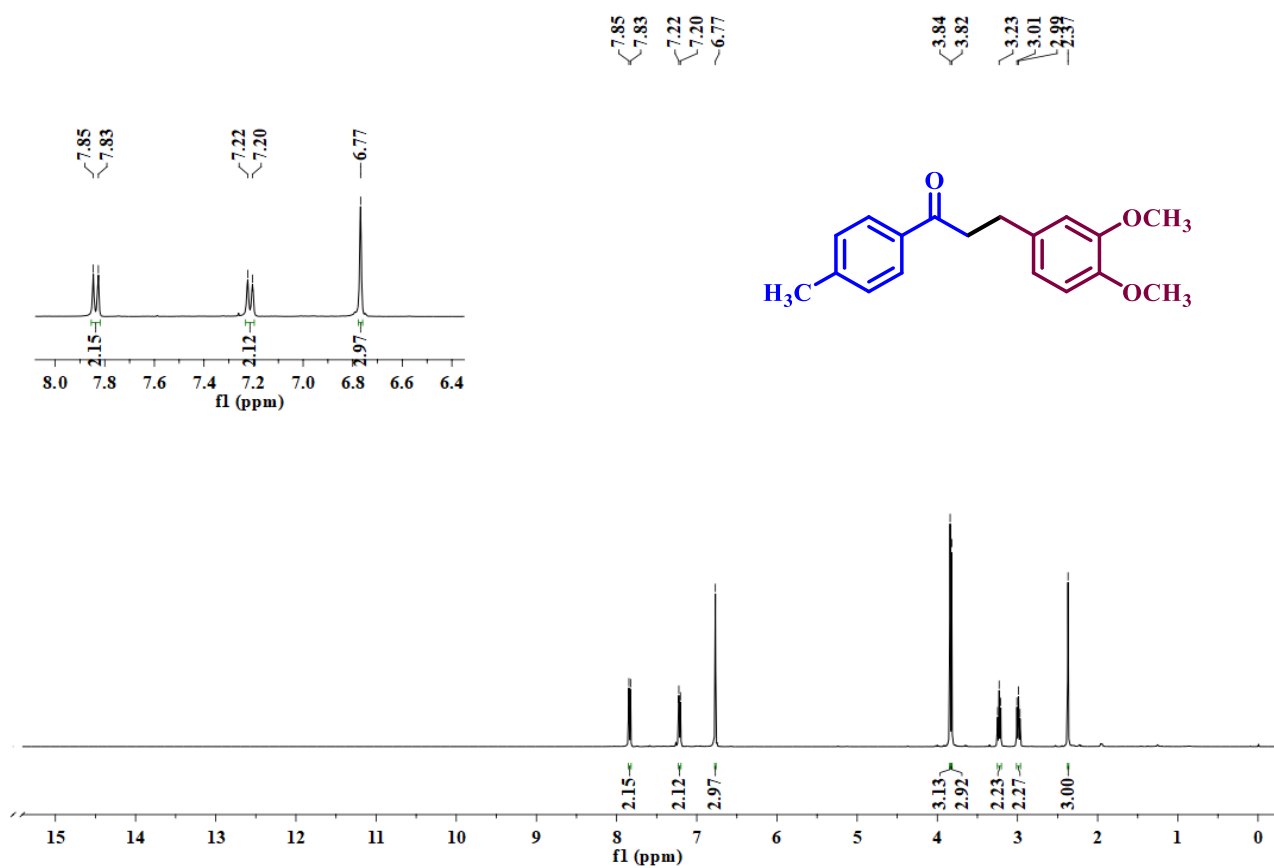

Figure S130. <sup>1</sup>H NMR spectrum of **5gc** taking CDCl<sub>3</sub> as solvent.

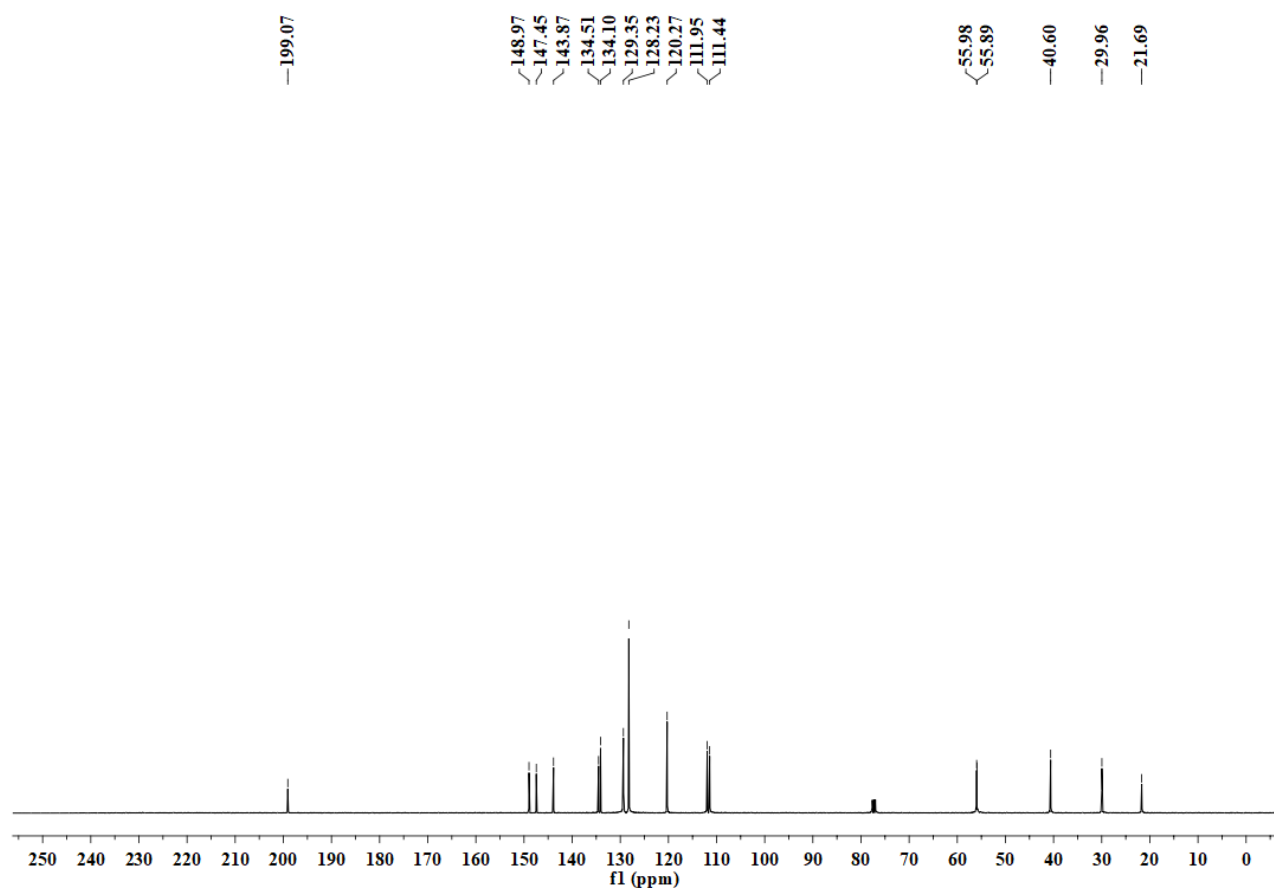

Figure S131. <sup>13</sup>C NMR spectrum of **5gc** taking CDCl<sub>3</sub> as solvent.

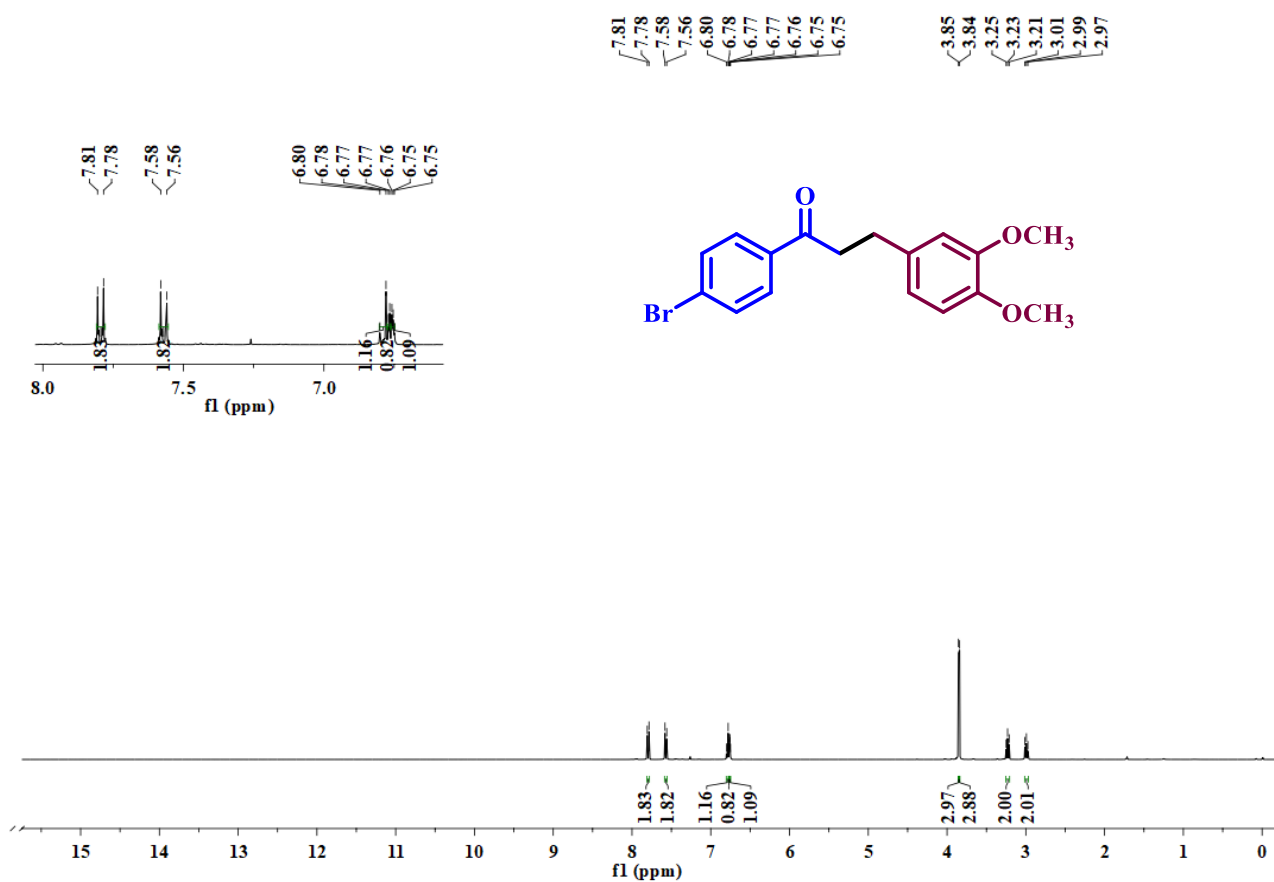

**Figure S132.** <sup>1</sup>H NMR spectrum of **5gd** taking CDCl<sub>3</sub> as solvent.

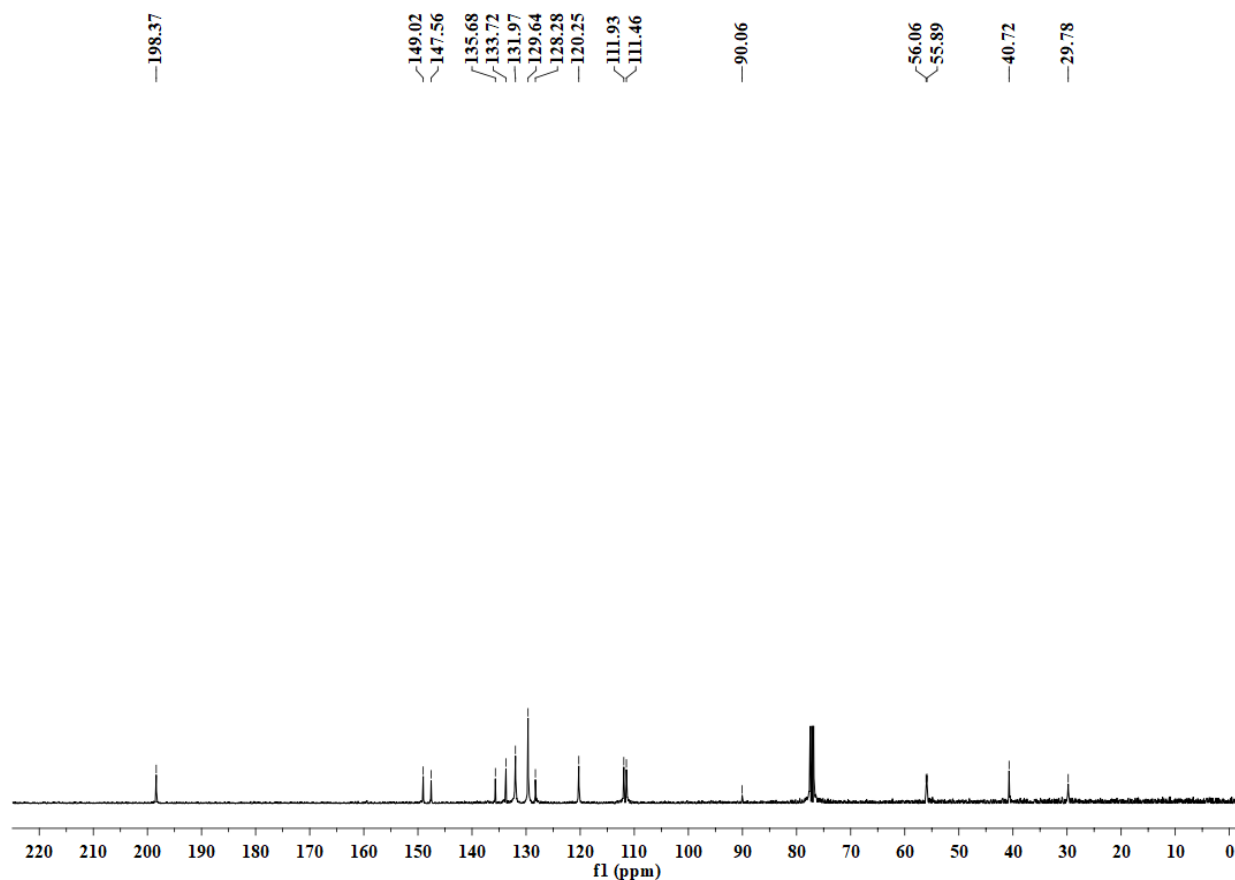

**Figure S133.** <sup>13</sup>C NMR spectrum of **5gd** taking CDCl<sub>3</sub> as solvent.

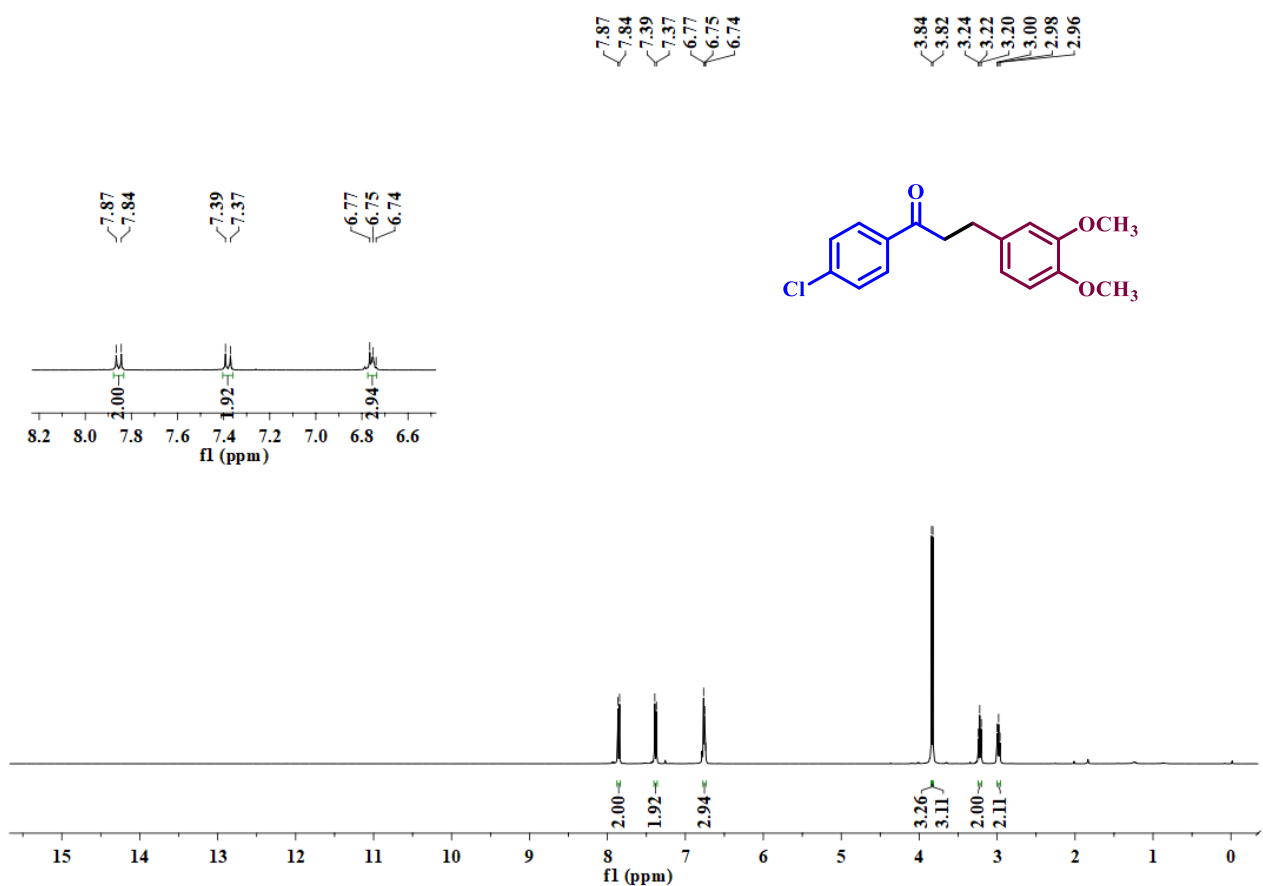

Figure S134. <sup>1</sup>H NMR spectrum of **5ge** taking CDCl<sub>3</sub> as solvent.

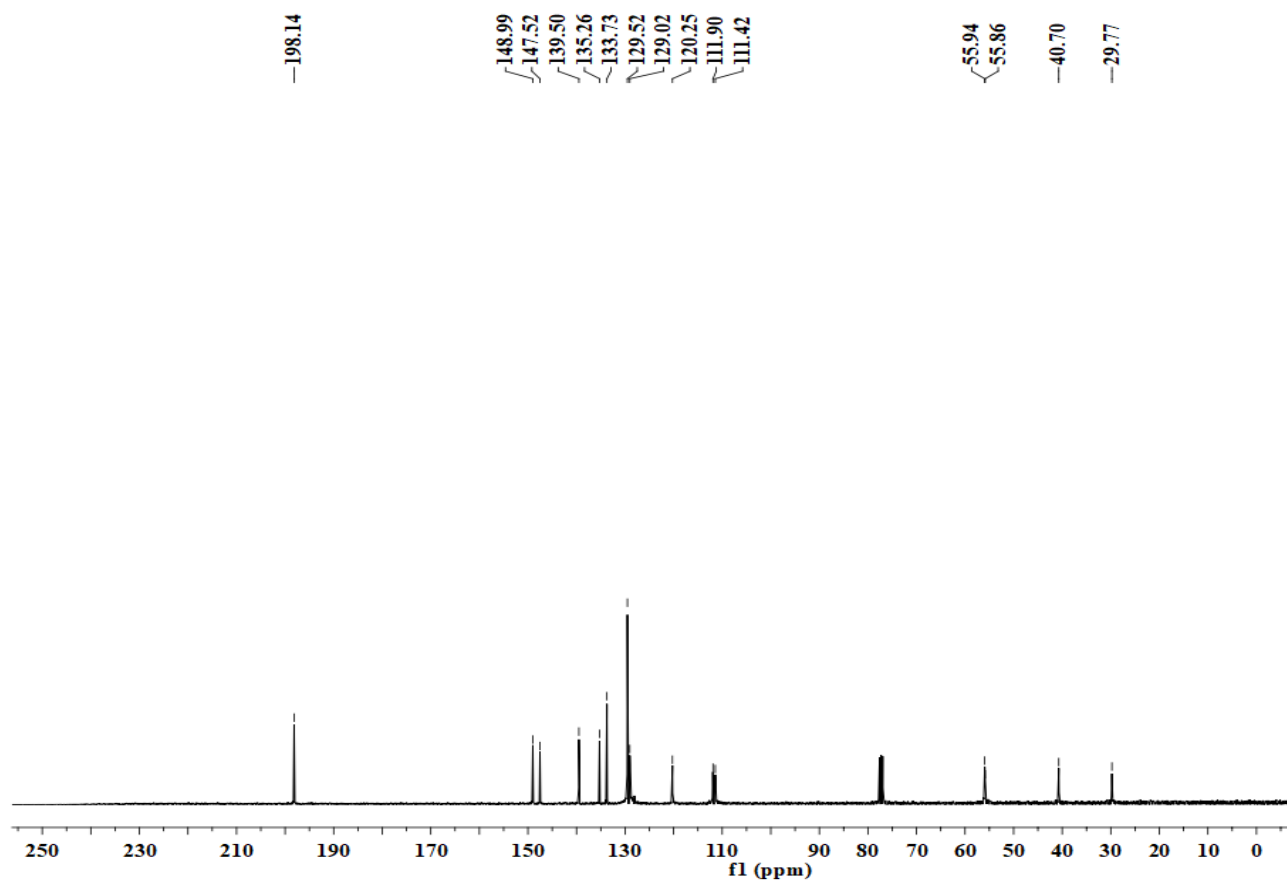

Figure S135. <sup>13</sup>C NMR spectrum of **5ge** taking CDCl<sub>3</sub> as solvent.

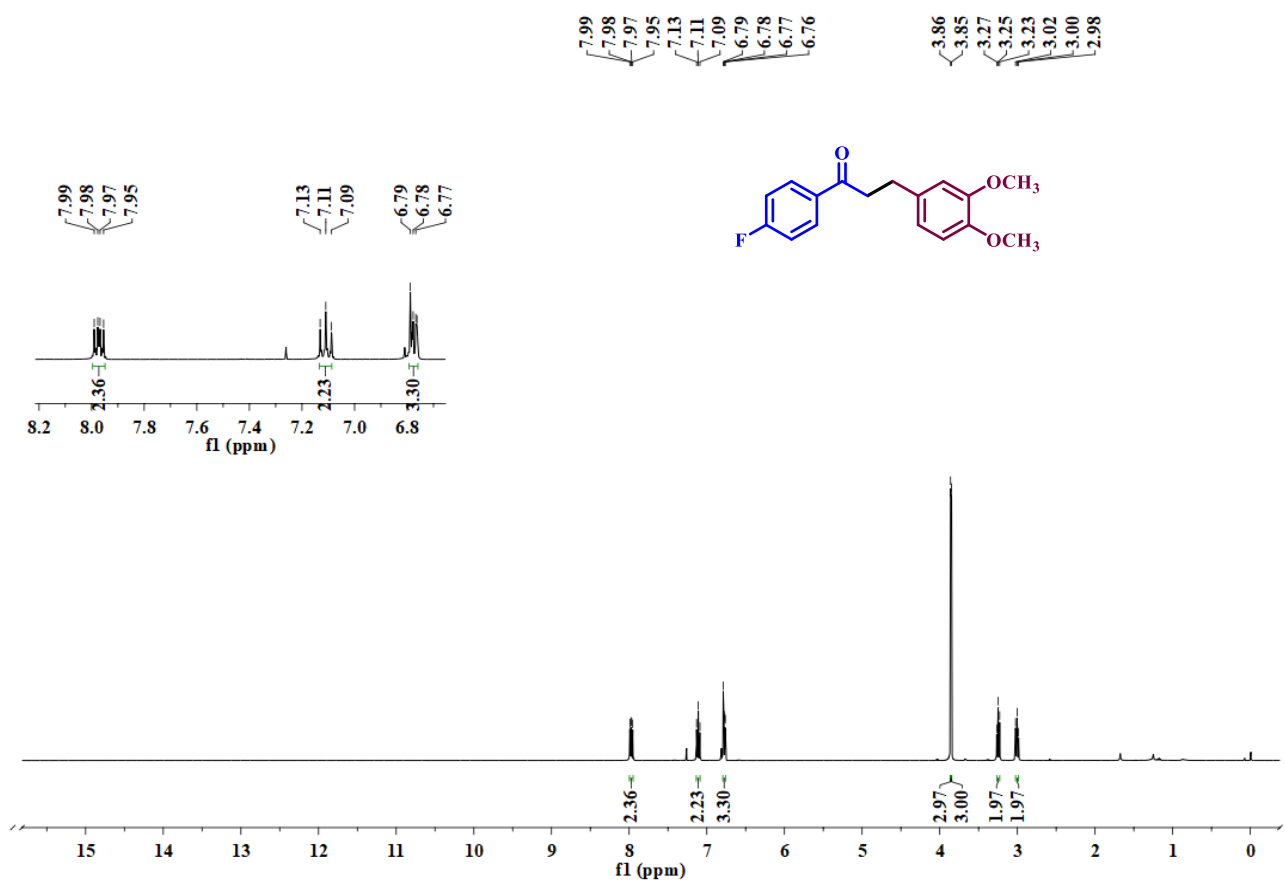

Figure S136. <sup>1</sup>H NMR spectrum of **5gf** taking CDCl<sub>3</sub> as solvent.

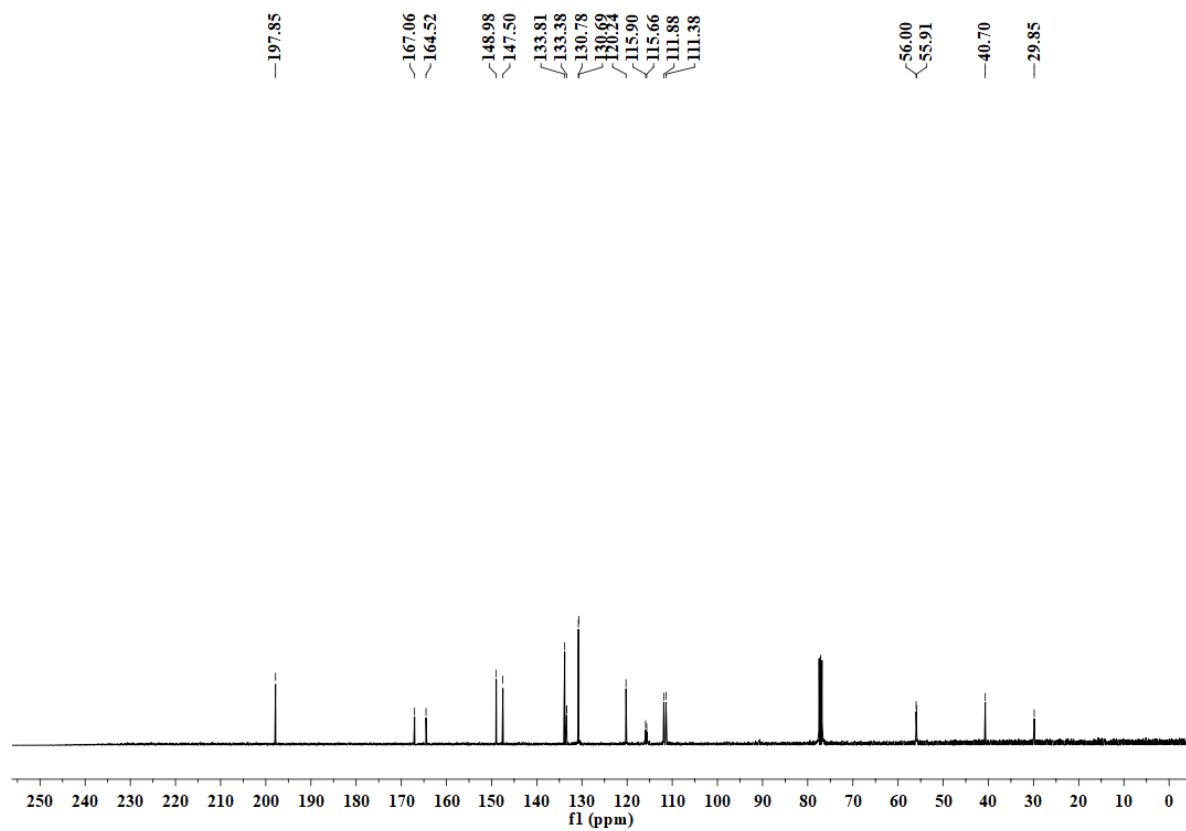

Figure S137. <sup>13</sup>C NMR spectrum of **5gf** taking CDCl<sub>3</sub> as solvent.



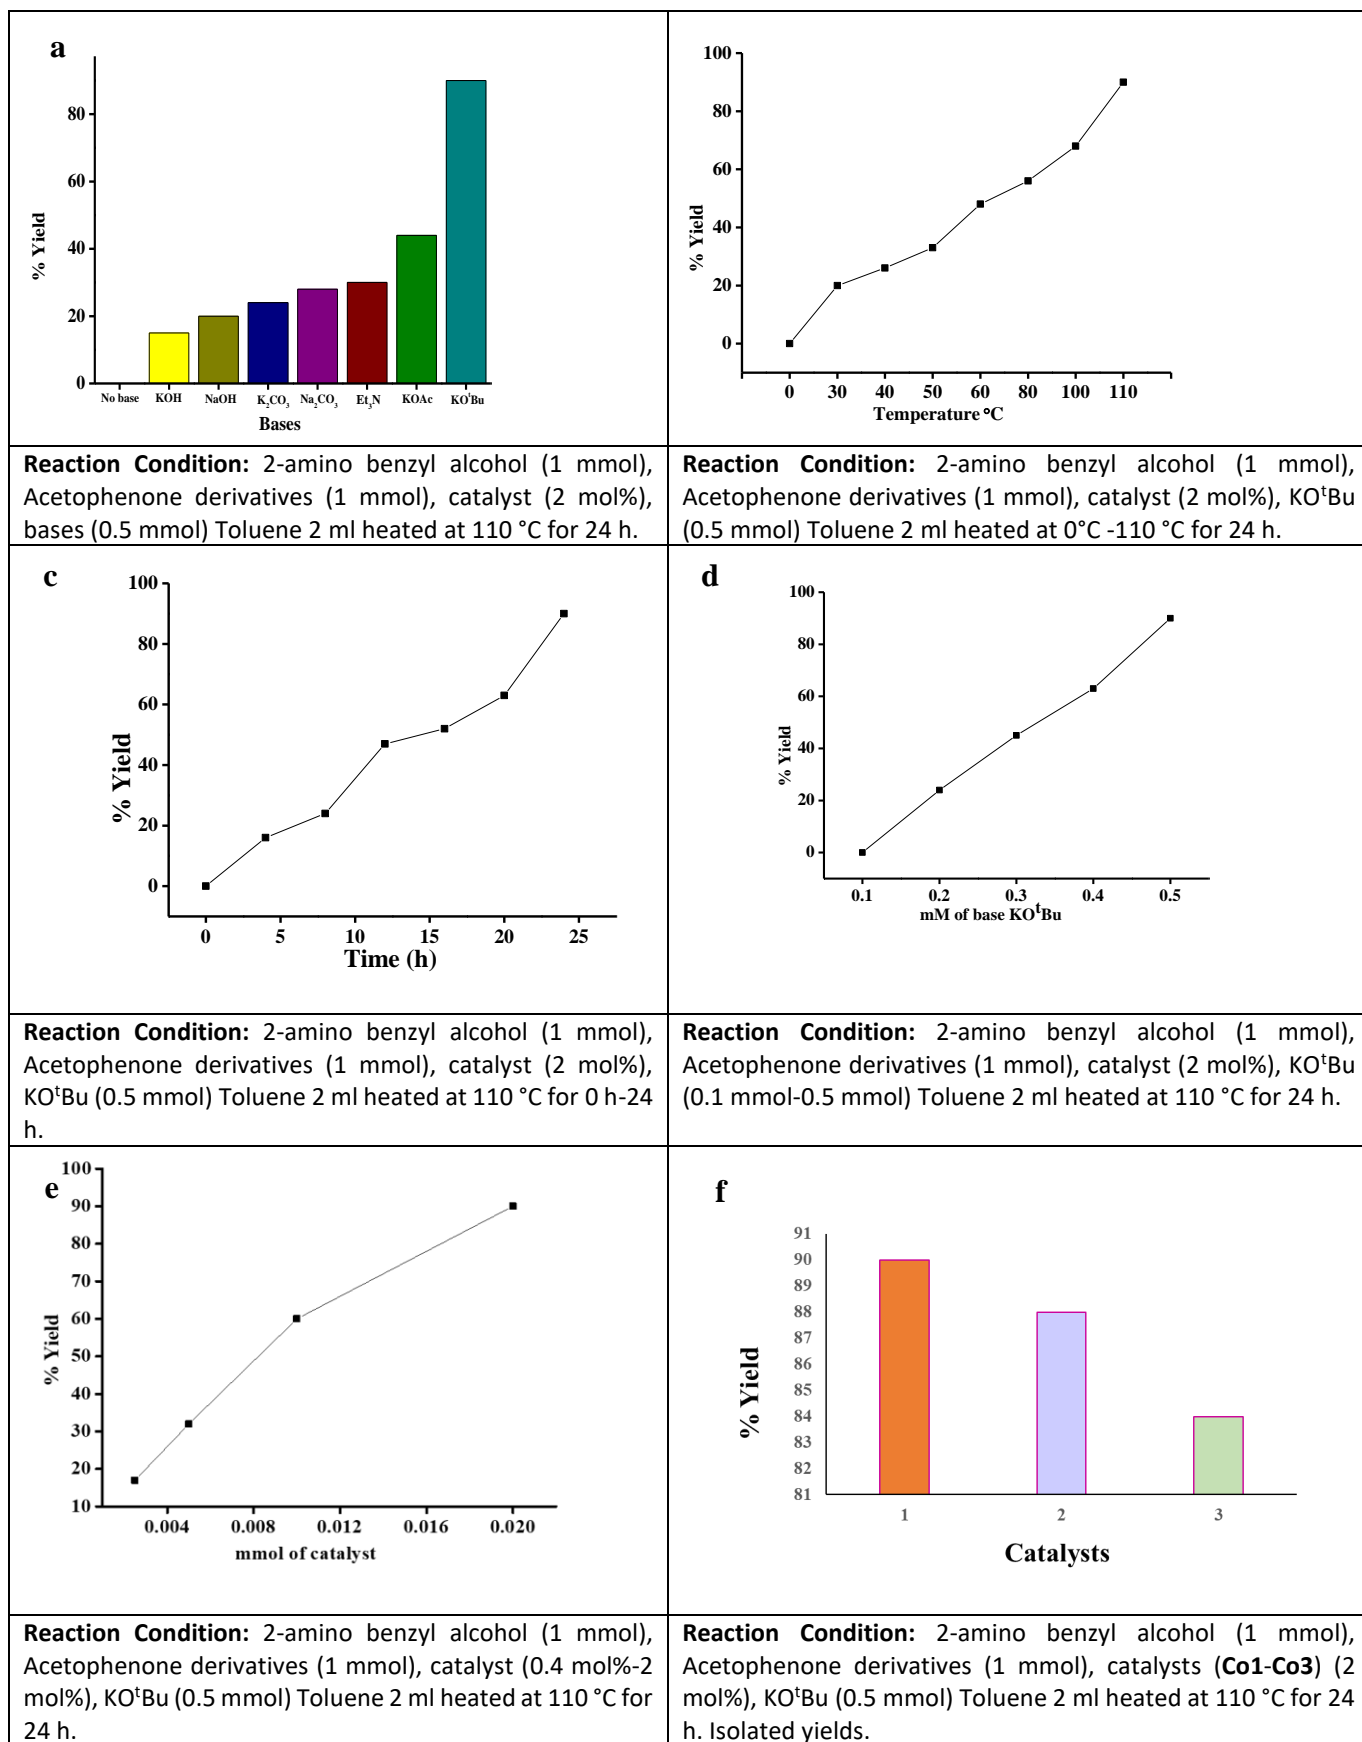

**Figure S138.** The reaction profile of cobalt catalyzed dehydrogenative cyclization of 2-amino benzyl alcohol (a) Effect of bases (b) Effect of temperature (c) Effect of time (d) Loading of base KO<sup>t</sup>Bu (e) Loading of catalysts (f) Effect of catalysts.

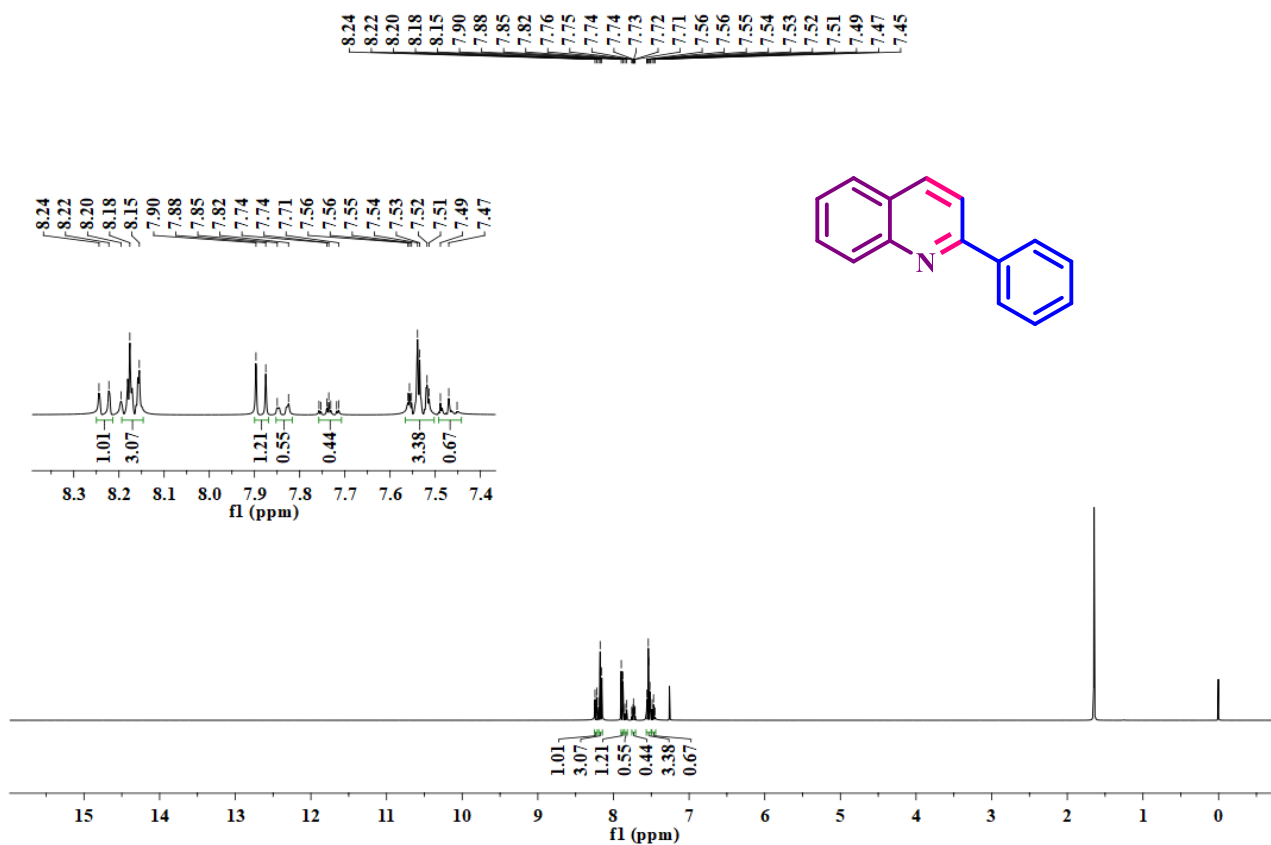

Figure S139. <sup>1</sup>H NMR spectrum of **7aa** taking CDCl<sub>3</sub> as solvent.

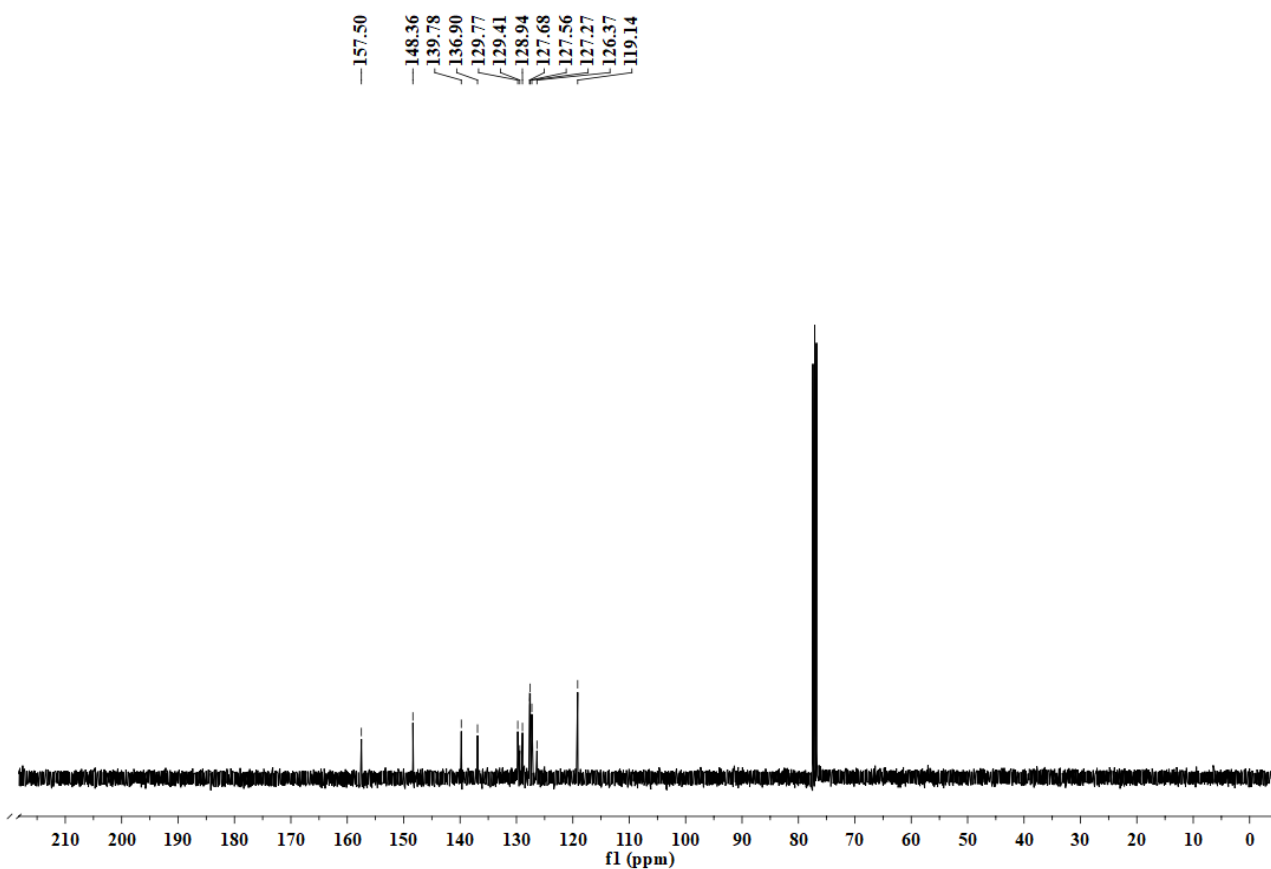

Figure S140. <sup>13</sup>C NMR spectrum of **7aa** taking CDCl<sub>3</sub> as solvent.

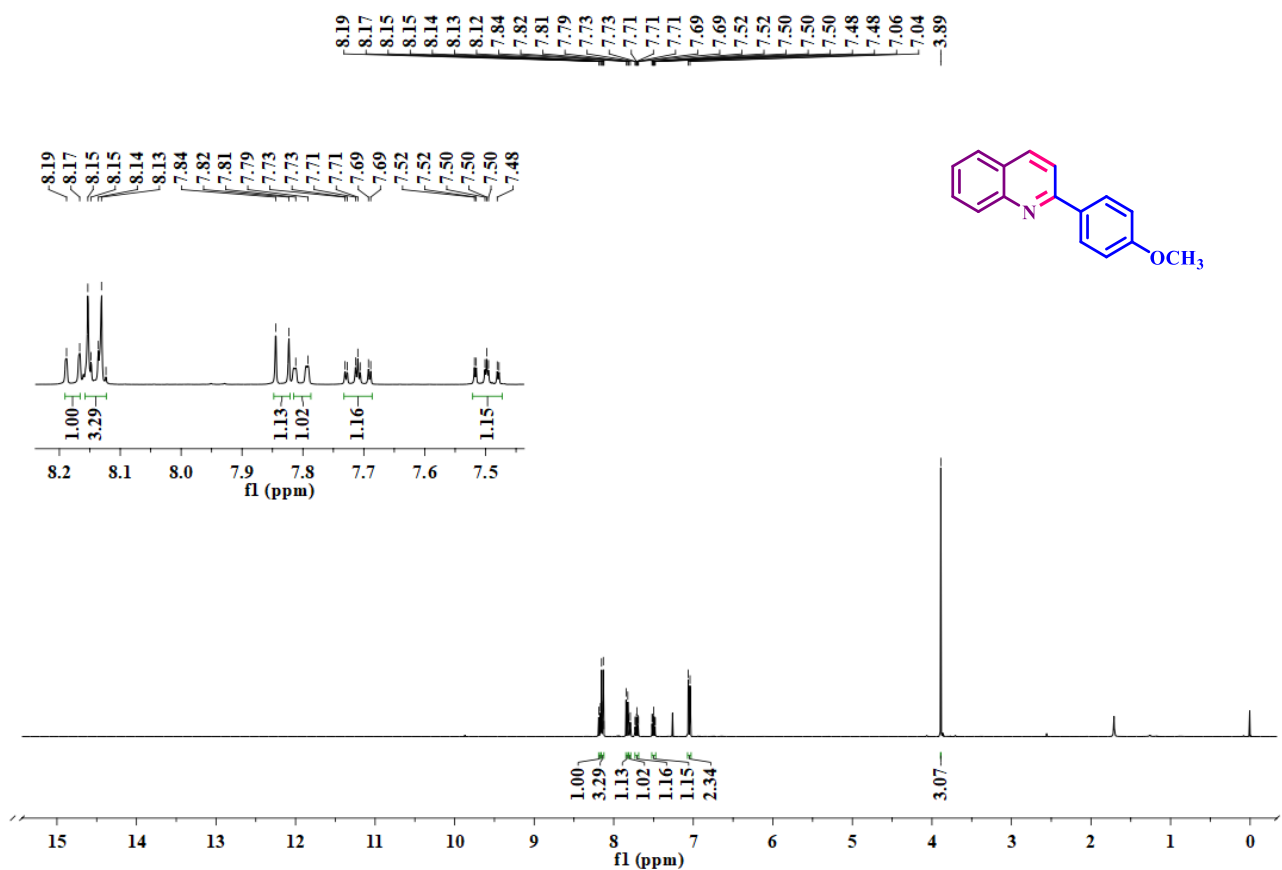

**Figure S141.** <sup>1</sup>H NMR spectrum of **7ab** taking CDCl<sub>3</sub> as solvent.

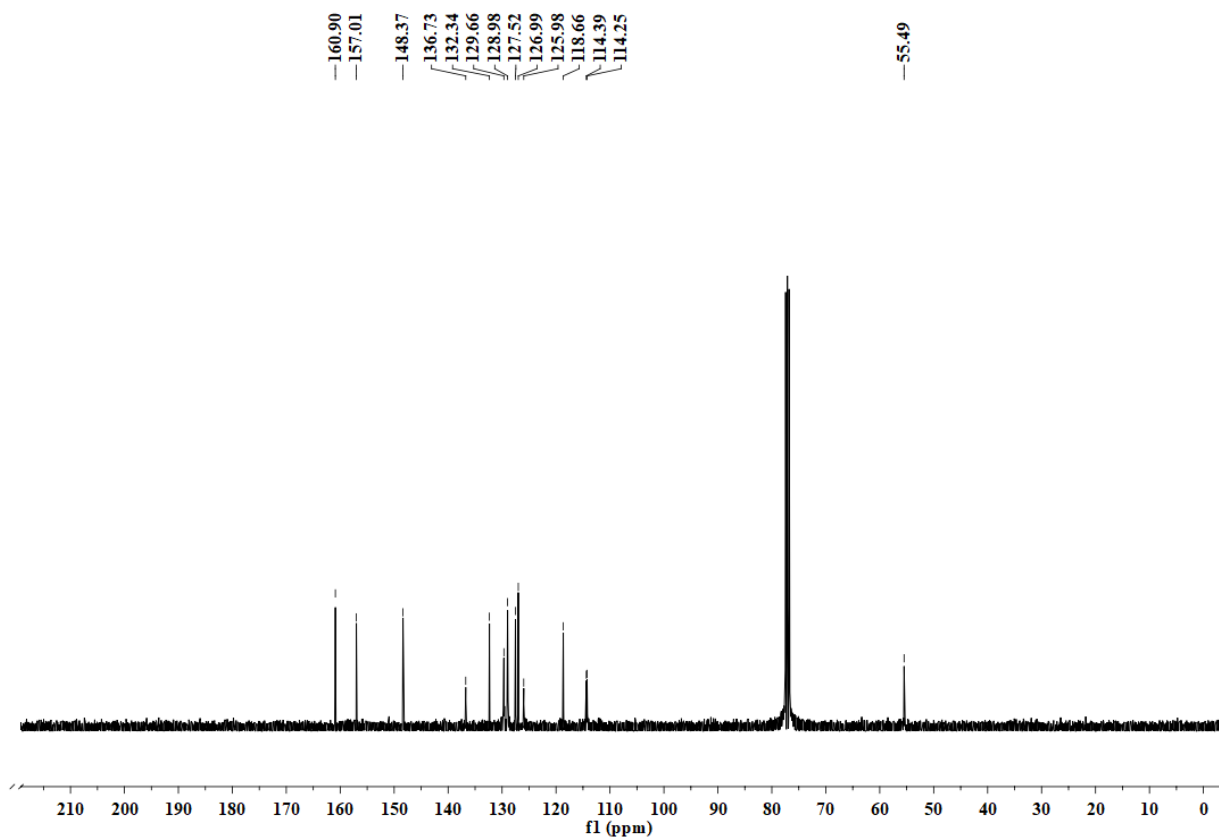

**Figure S142.** <sup>13</sup>C NMR spectrum of **7ab** taking CDCl<sub>3</sub> as solvent.

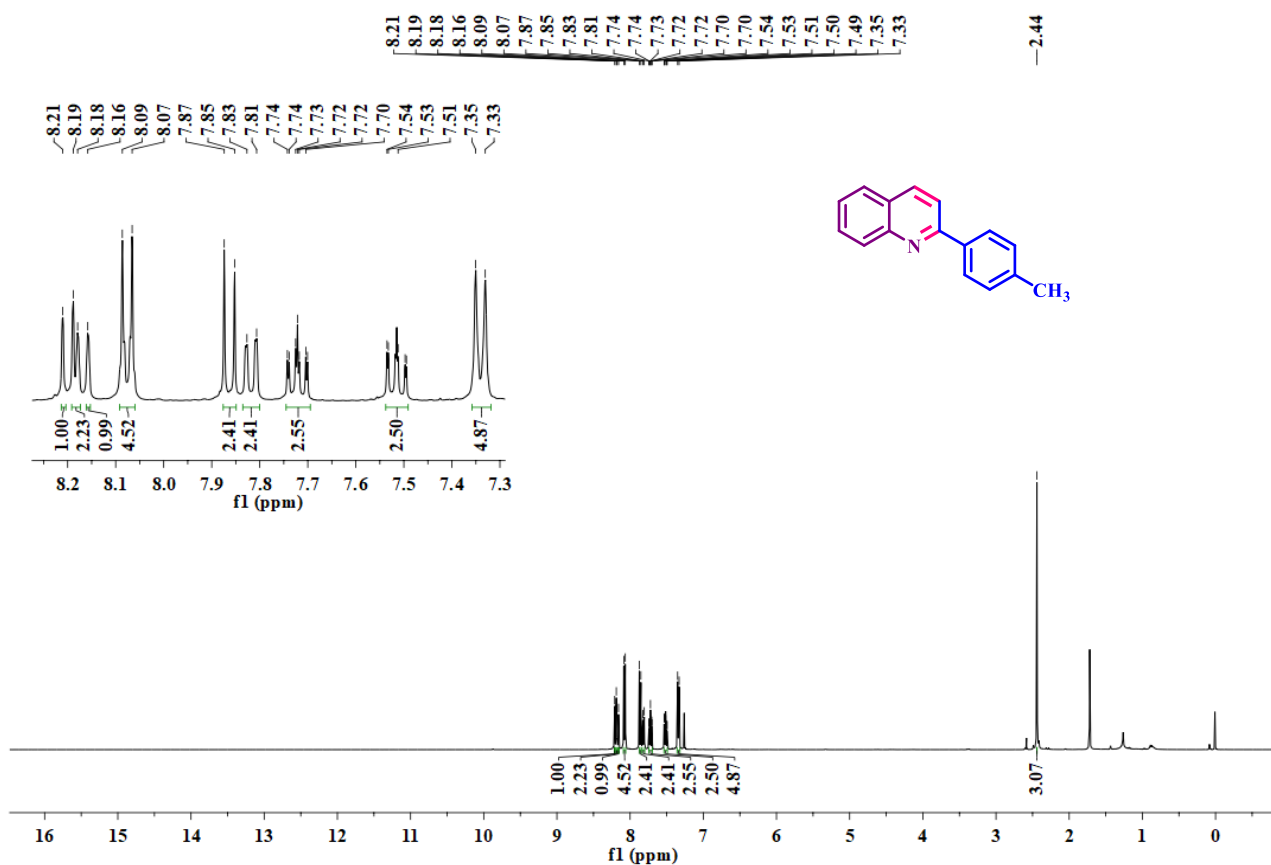

**Figure S143.** <sup>1</sup>H NMR spectrum of **7ac** taking CDCl<sub>3</sub> as solvent.

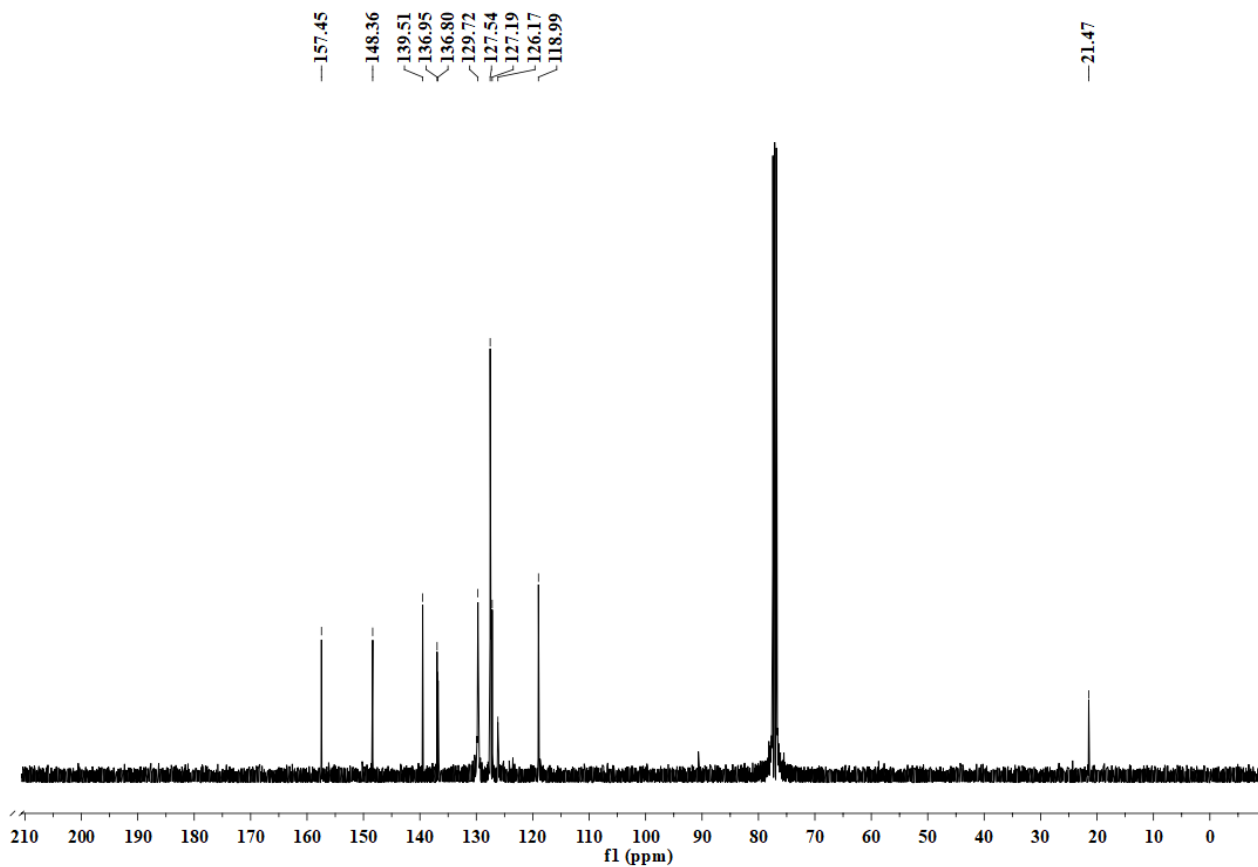

**Figure S144.** <sup>13</sup>C NMR spectrum of **7ac** taking CDCl<sub>3</sub> as solvent.

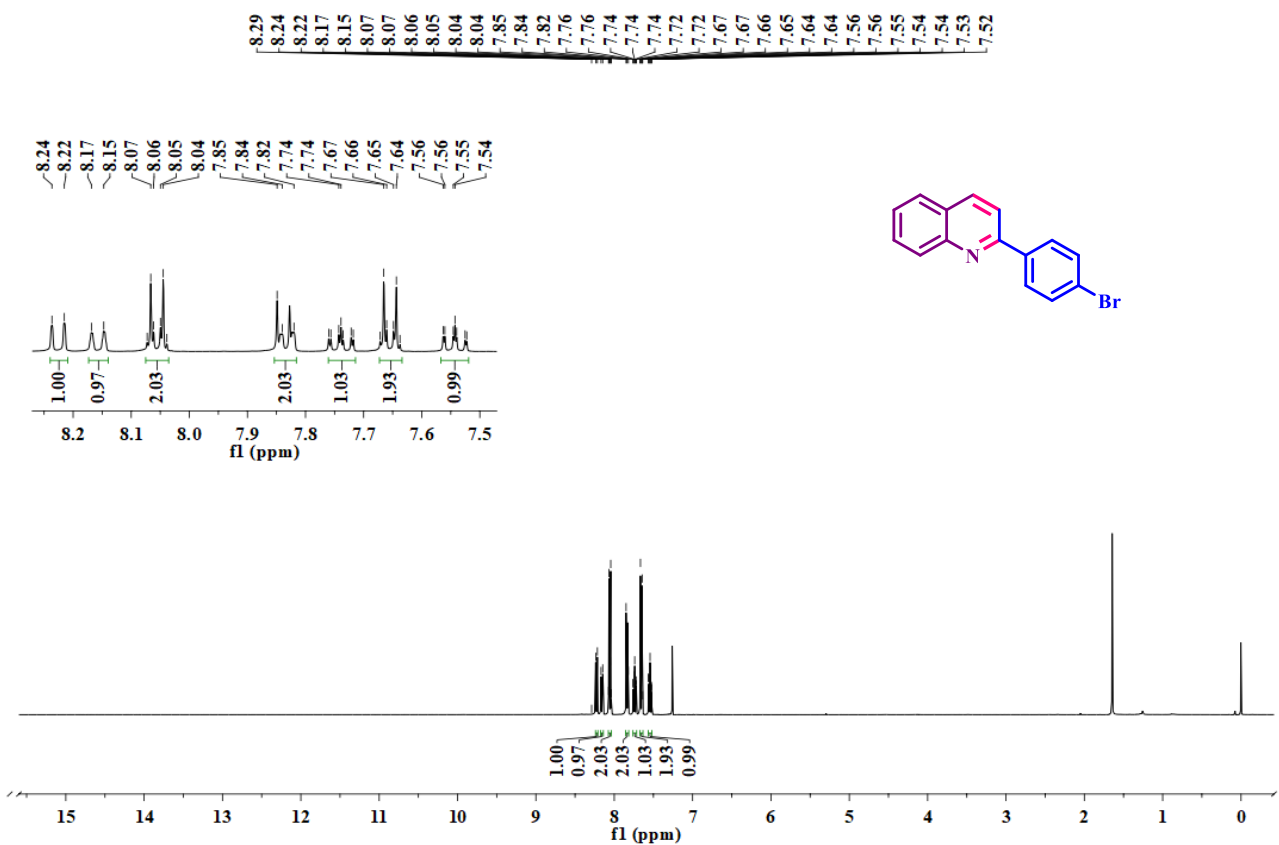

Figure S145. <sup>1</sup>H NMR spectrum of **7ad** taking CDCl<sub>3</sub> as solvent.

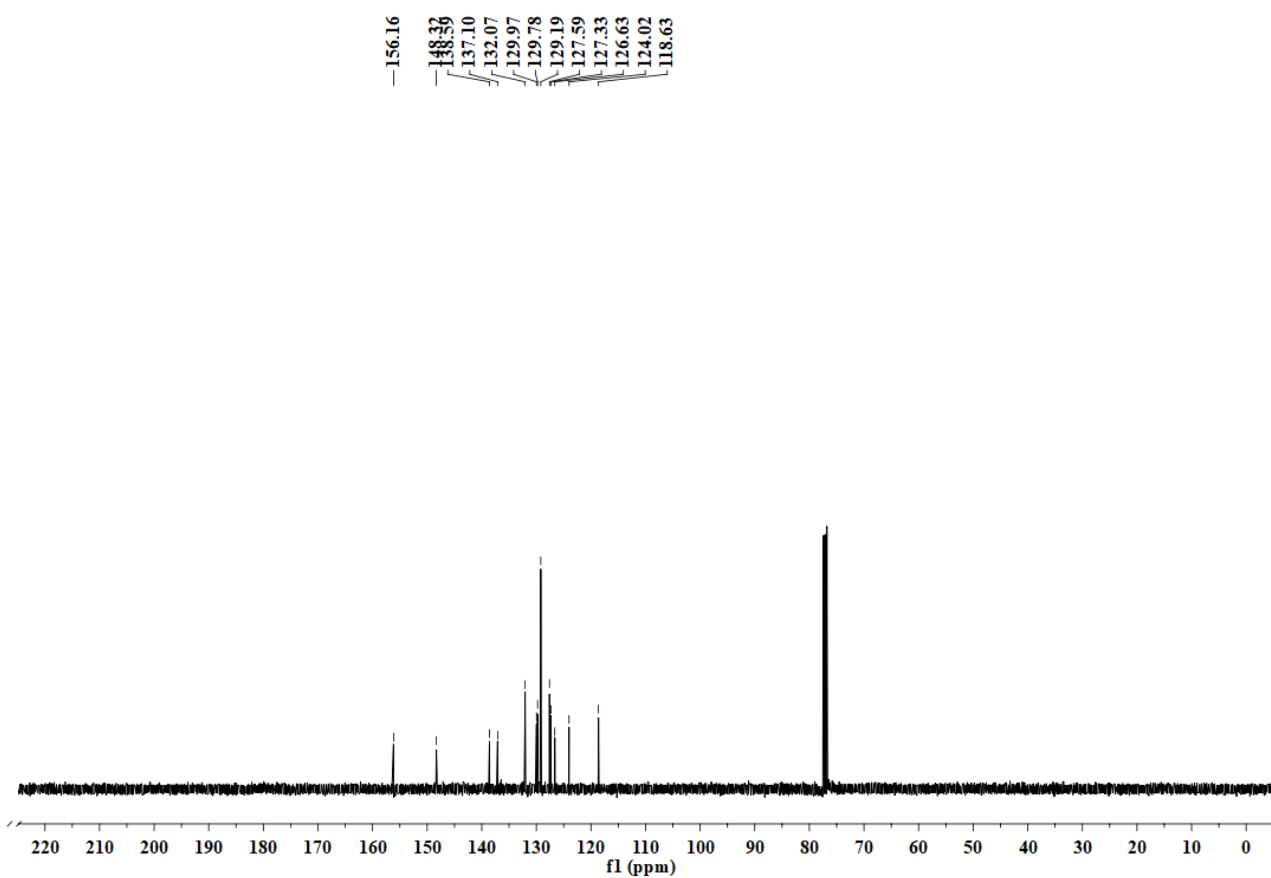

Figure S146. <sup>13</sup>C NMR spectrum of **7ad** taking CDCl<sub>3</sub> as solvent.

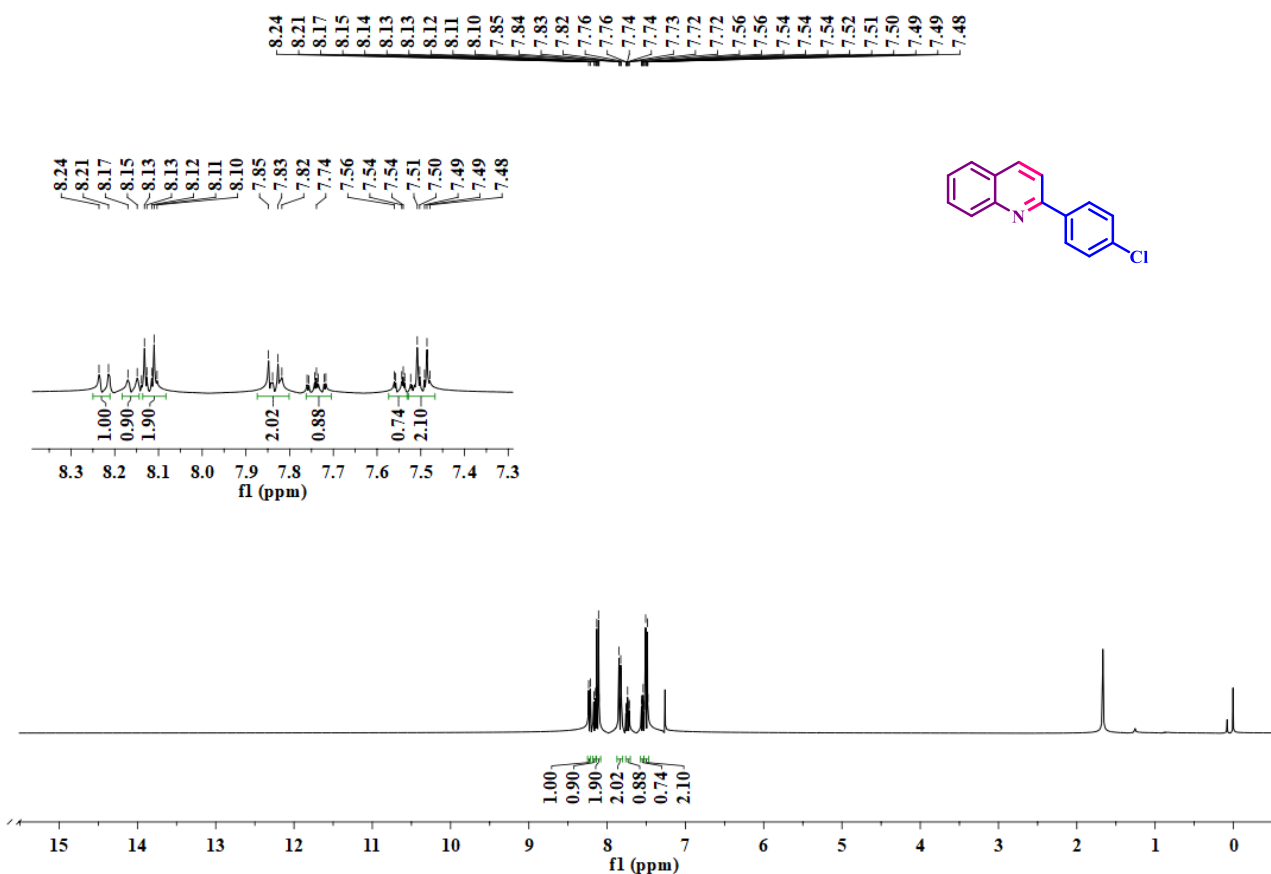

Figure S147. <sup>1</sup>H NMR spectrum of **7ae** taking CDCl<sub>3</sub> as solvent.

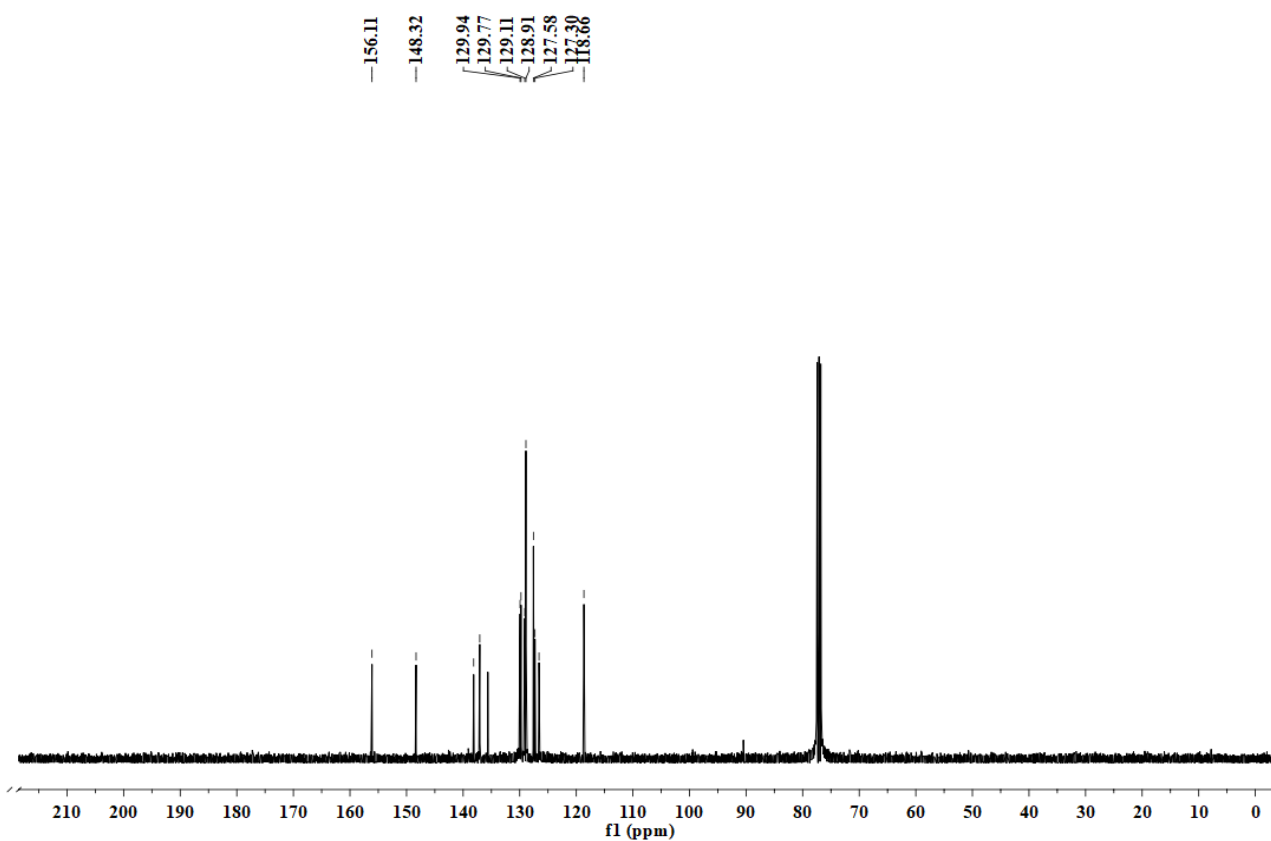

Figure S148. <sup>13</sup>C NMR spectrum of **7ae** taking CDCl<sub>3</sub> as solvent.

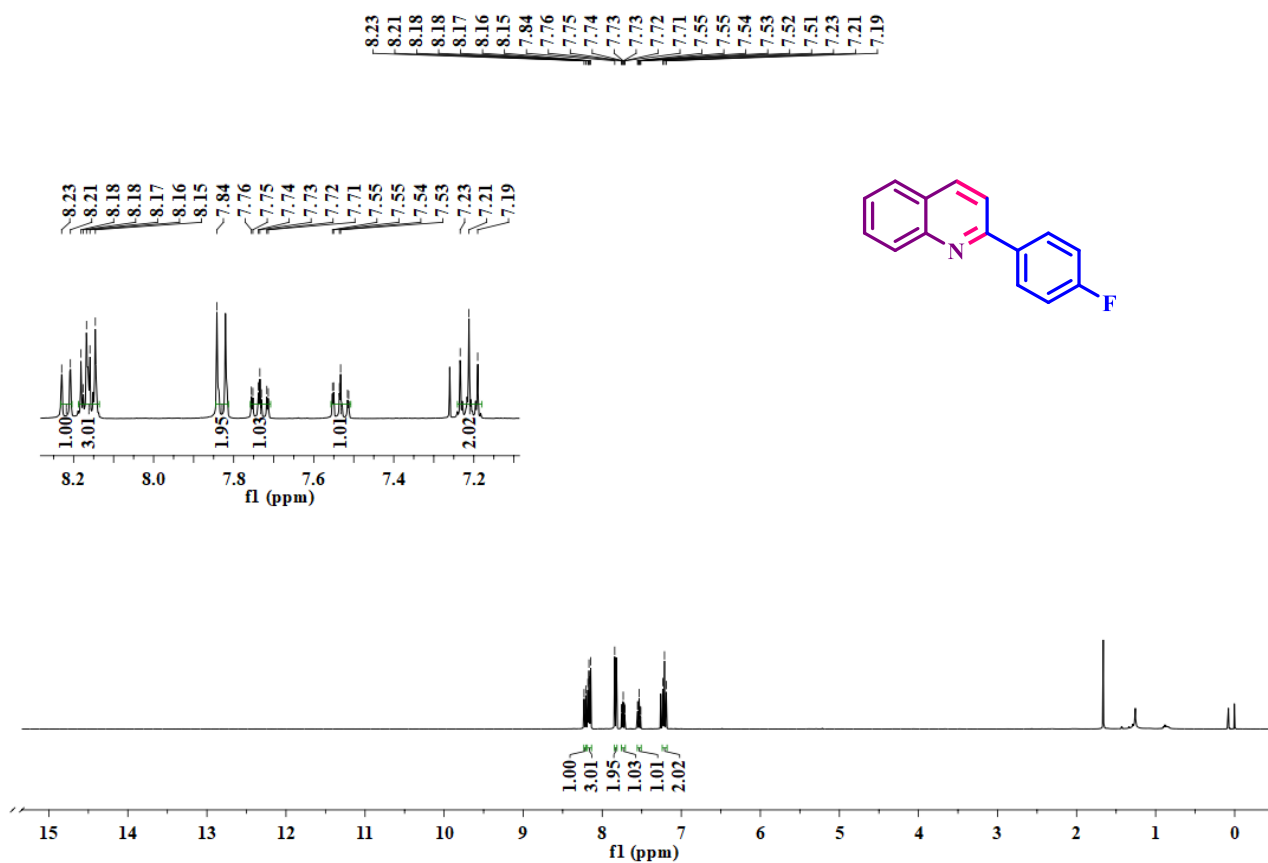

Figure S149. <sup>1</sup>H NMR spectrum of **7af** taking CDCl<sub>3</sub> as solvent.

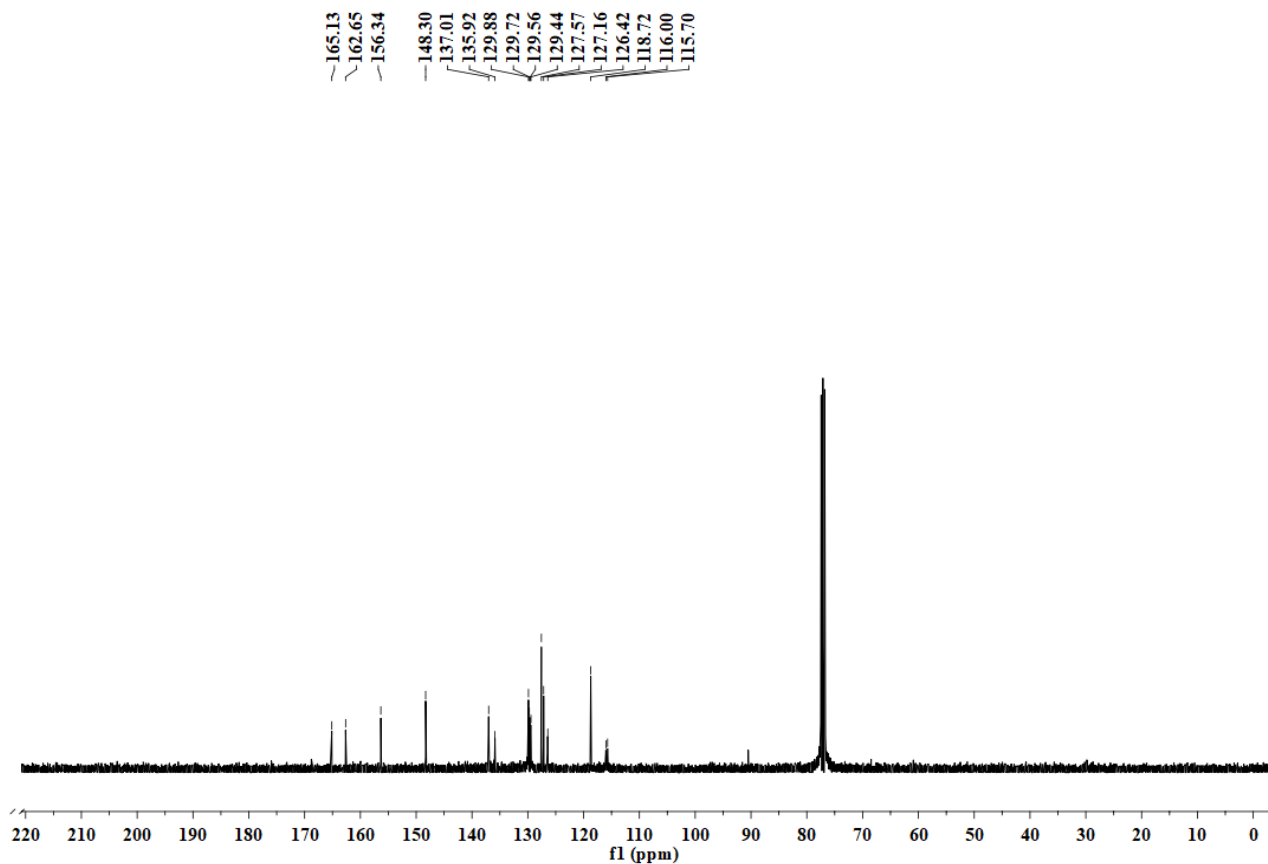

Figure S150. <sup>13</sup>C NMR spectrum of **7af** taking CDCl<sub>3</sub> as solvent.

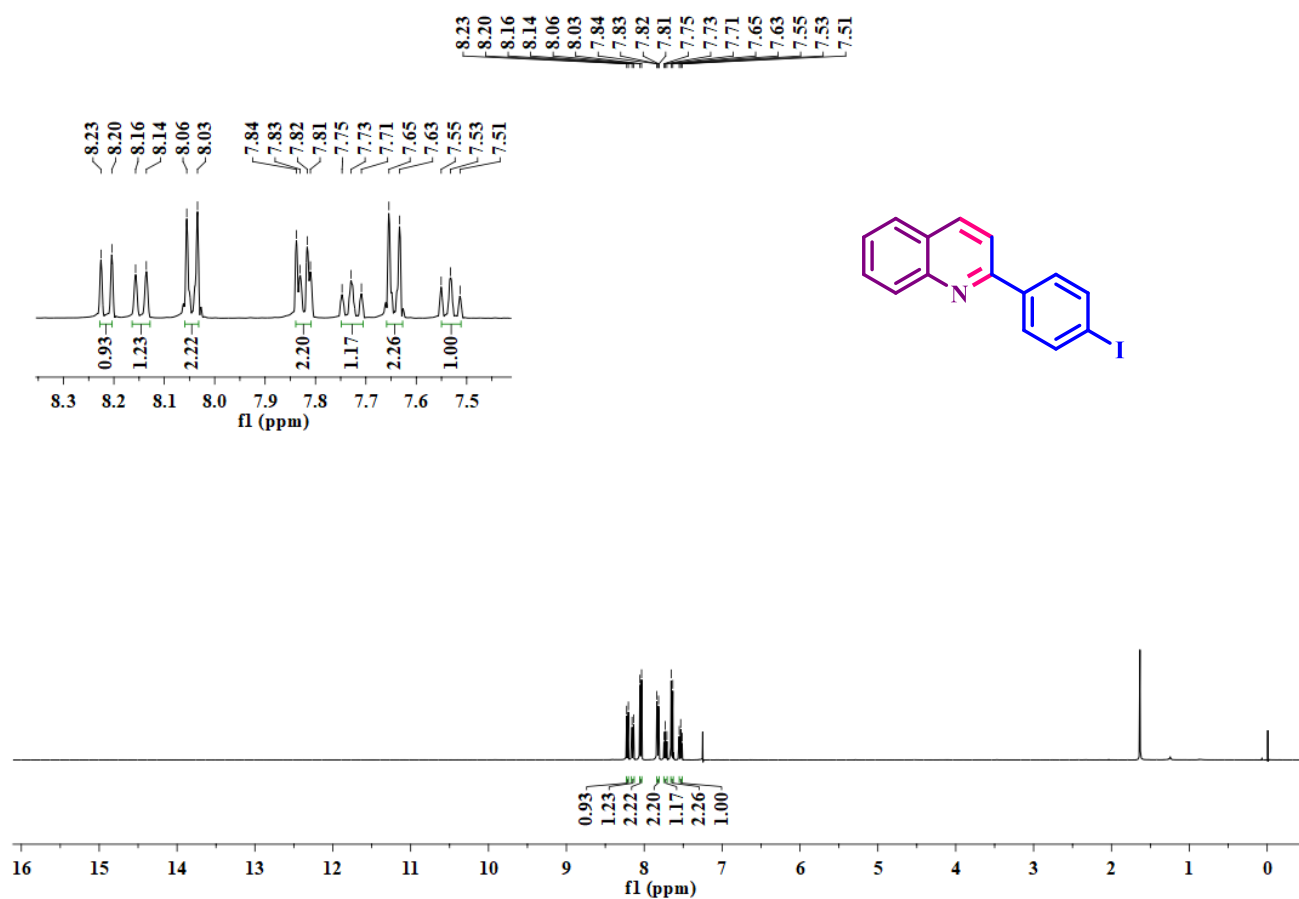

Figure S151. <sup>1</sup>H NMR spectrum of **7ag** taking CDCl<sub>3</sub> as solvent.

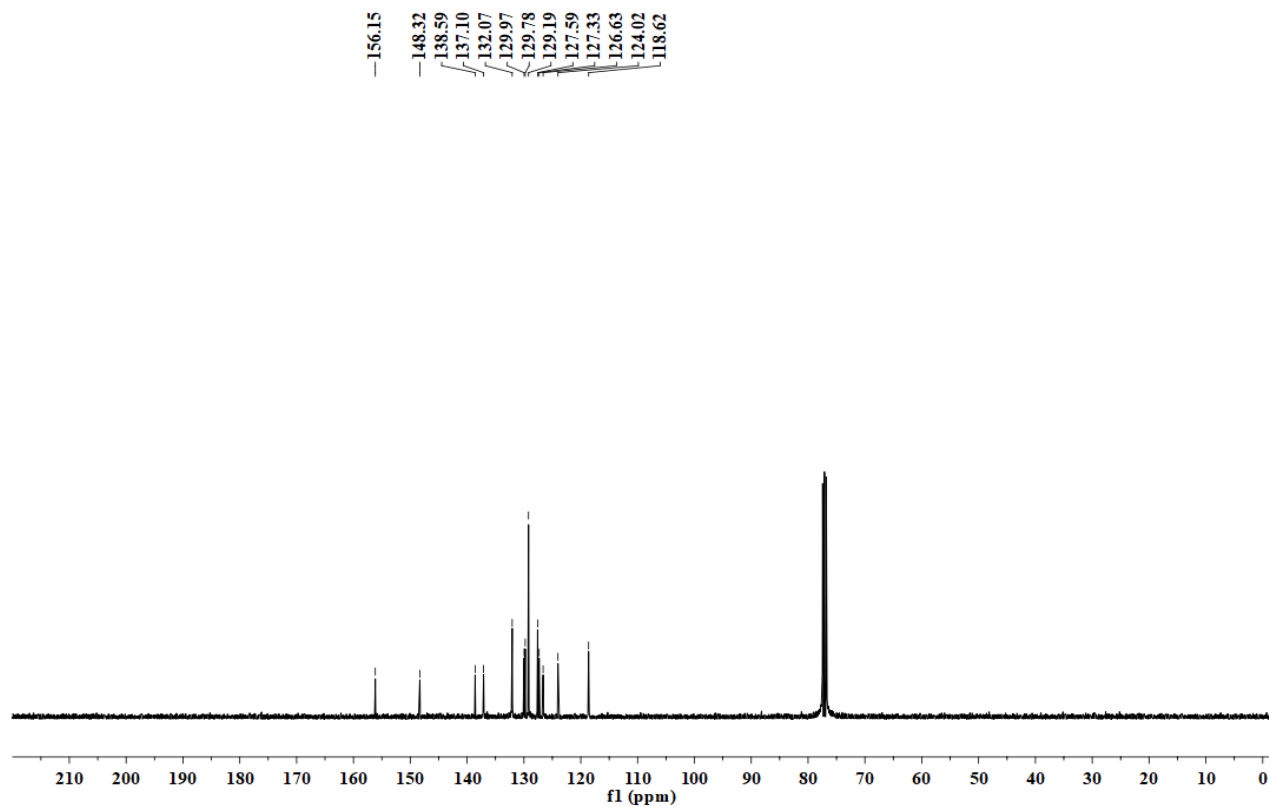

Figure S152. <sup>13</sup>C NMR spectrum of **7ag** taking CDCl<sub>3</sub> as solvent.



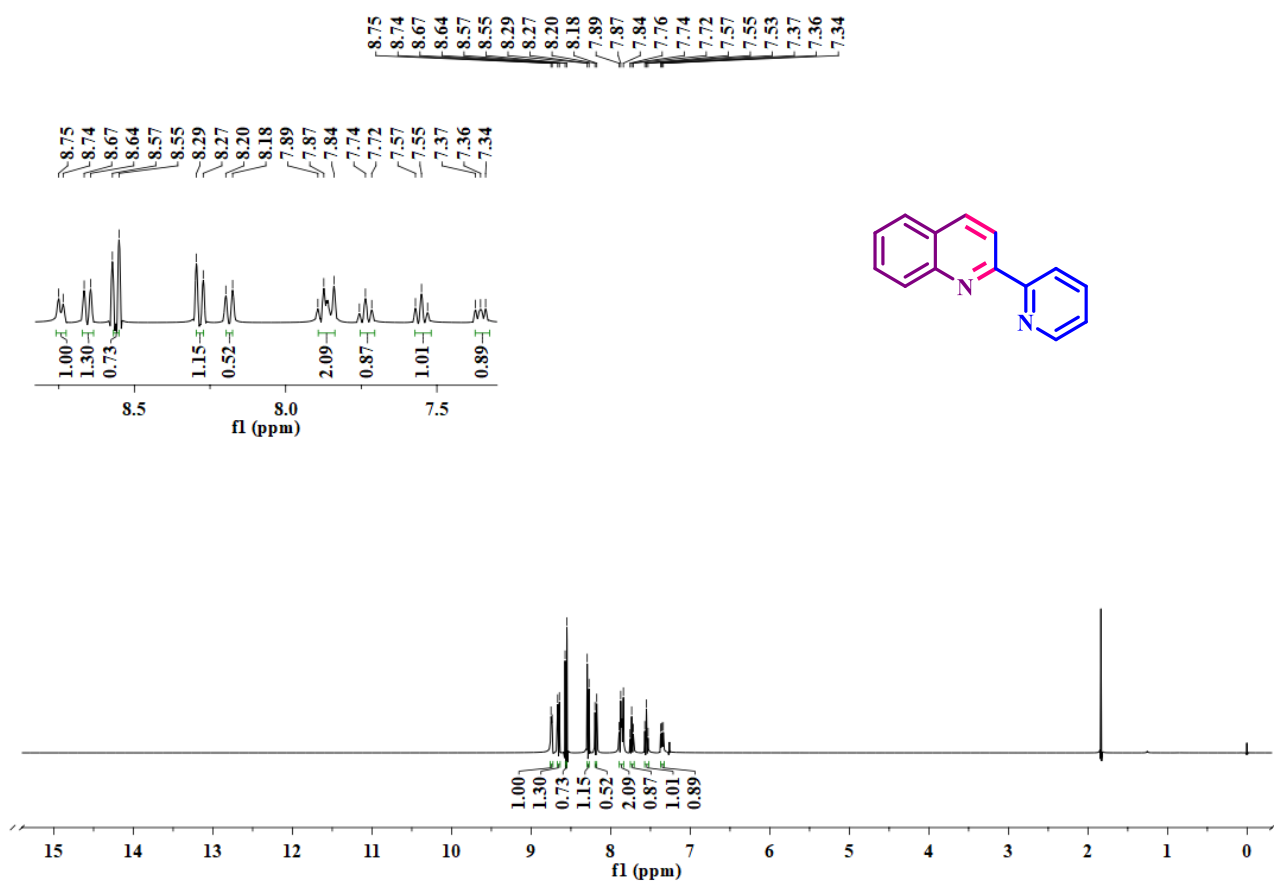

Figure S153. <sup>1</sup>H NMR spectrum of **7ah** taking CDCl<sub>3</sub> as solvent.

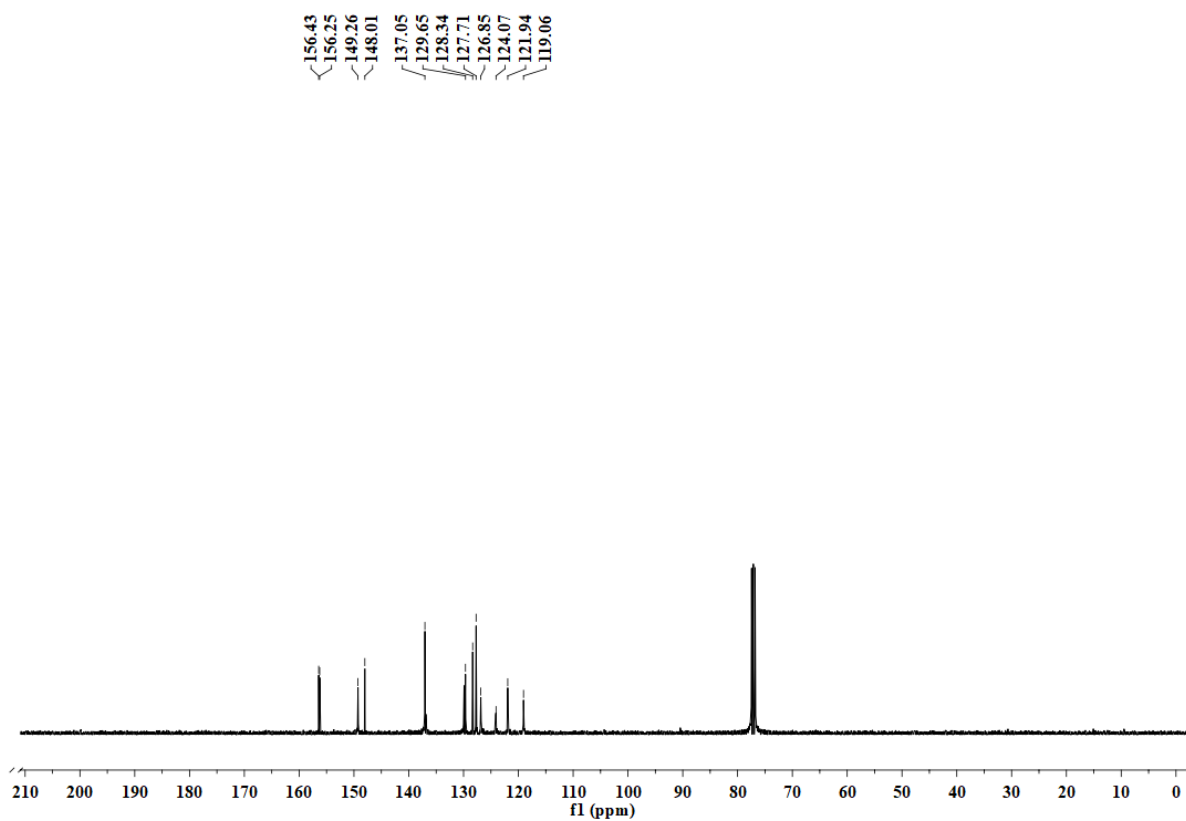

Figure S154. <sup>13</sup>C NMR spectrum of **7ah** taking CDCl<sub>3</sub> as solvent.

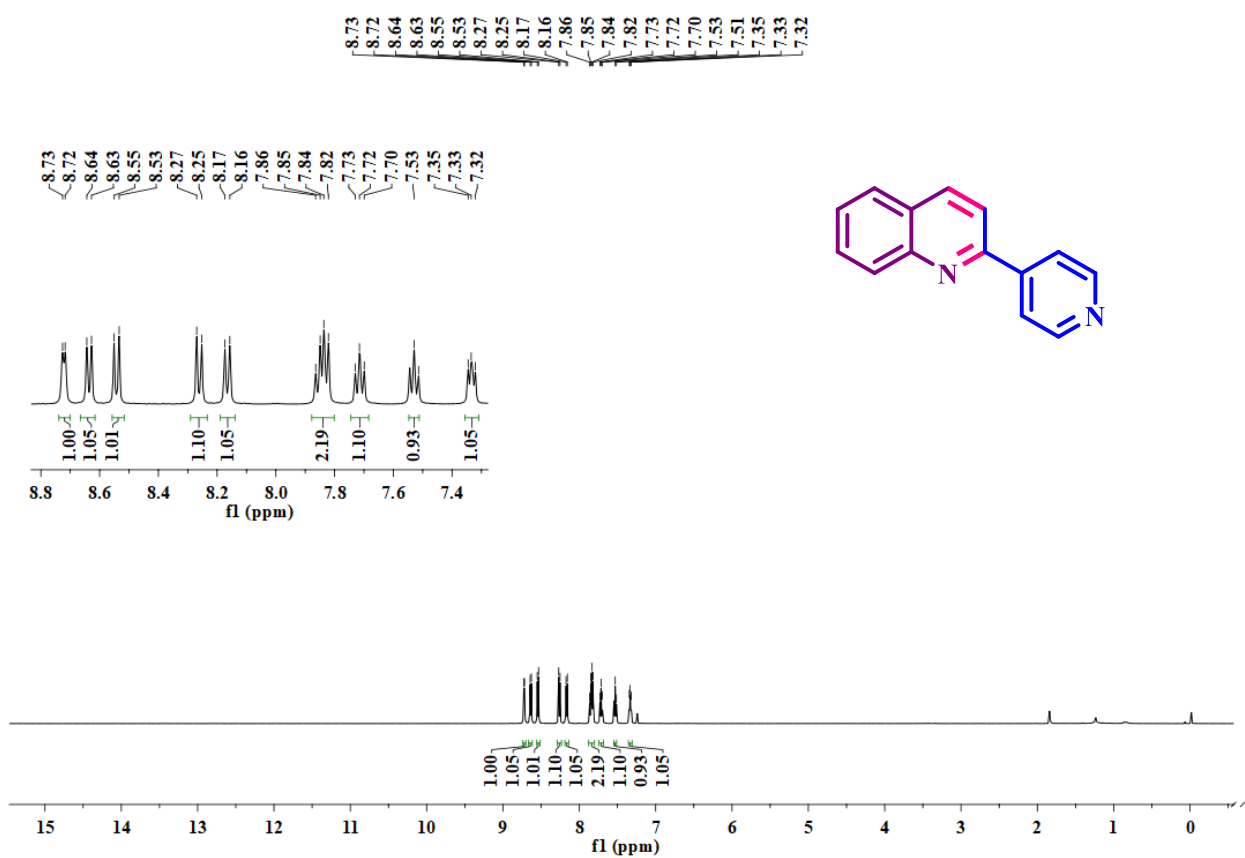

Figure S155. <sup>1</sup>H NMR spectrum of **7ai** taking CDCl<sub>3</sub> as solvent.

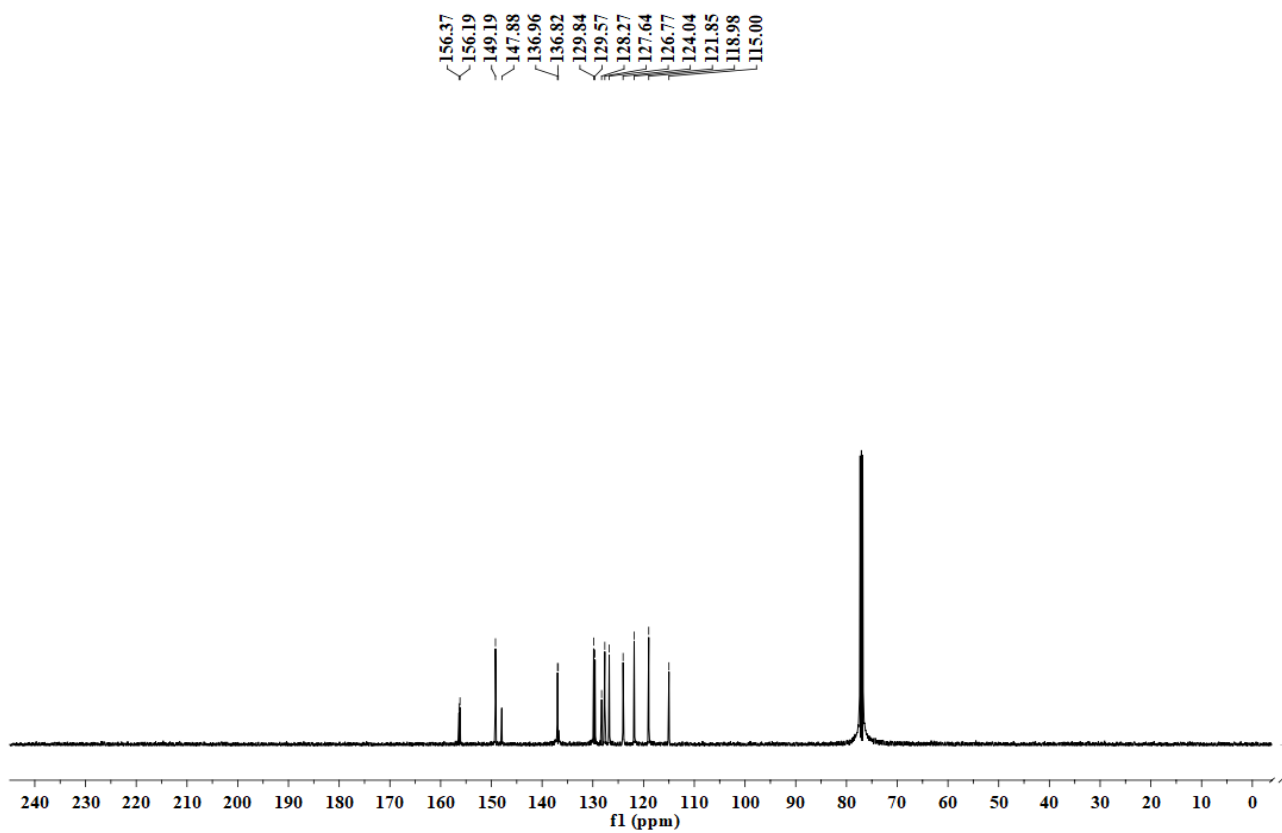

Figure S156. <sup>13</sup>C NMR spectrum of **7ai** taking CDCl<sub>3</sub> as solvent.

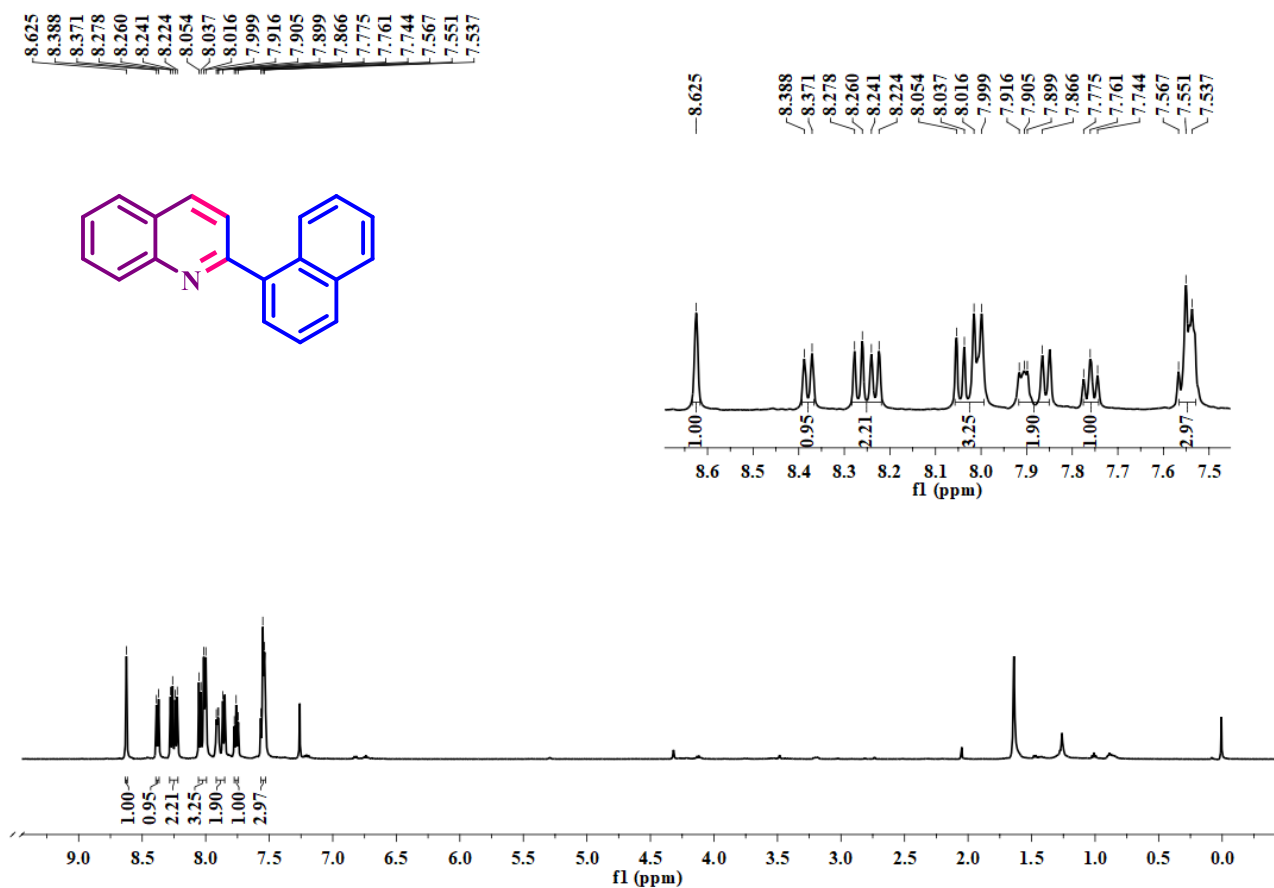

Figure S157. <sup>1</sup>H NMR spectrum of **7aj** taking CDCl<sub>3</sub> as solvent.

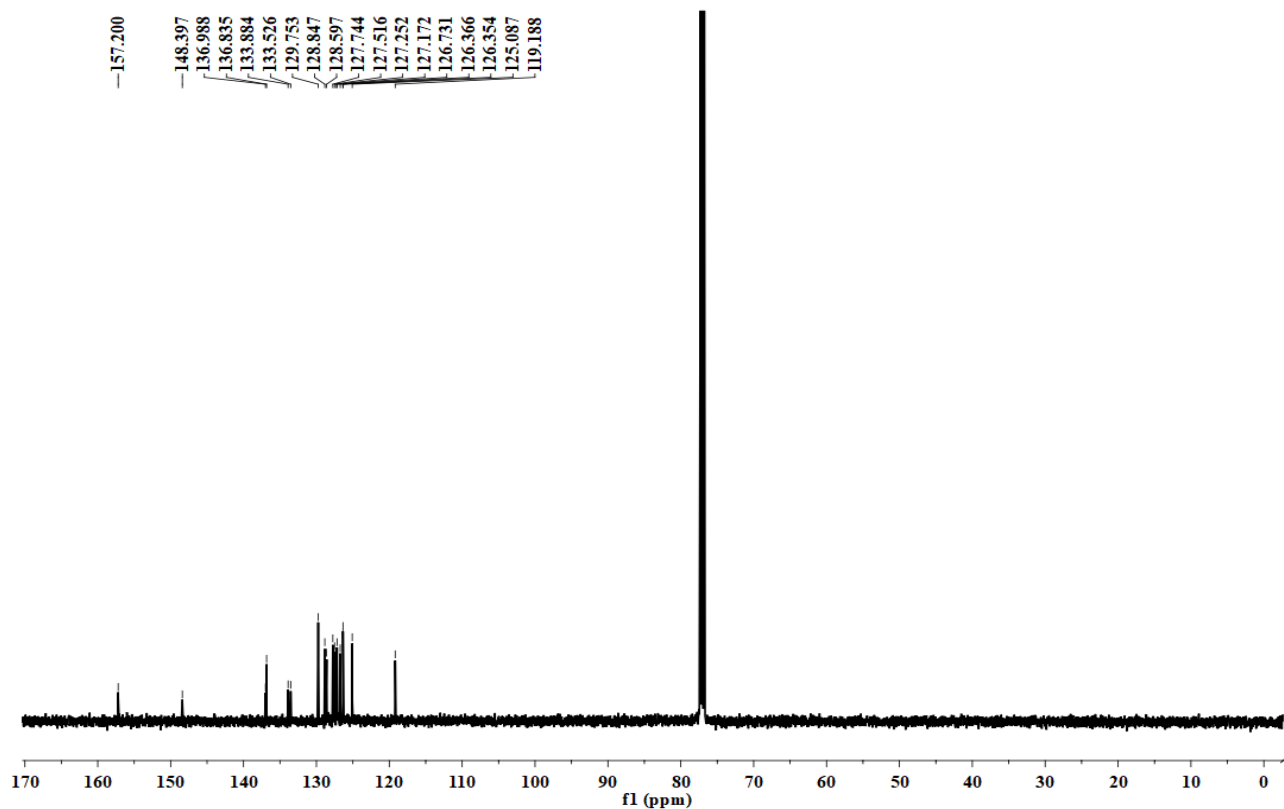

Figure S158. <sup>13</sup>C NMR spectrum of **7aj** taking CDCl<sub>3</sub> as solvent.

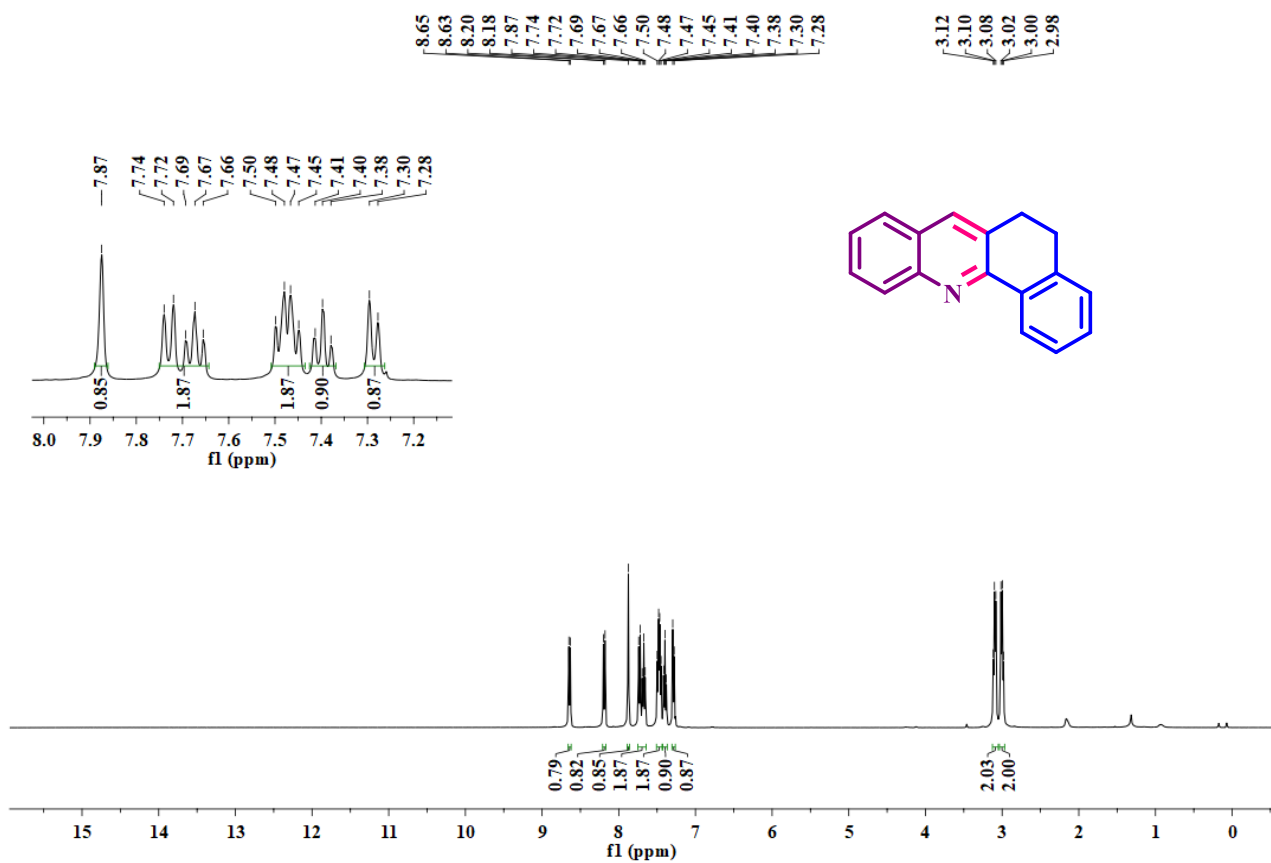

Figure S159. <sup>1</sup>H NMR spectrum of **7ak** taking CDCl<sub>3</sub> as solvent.

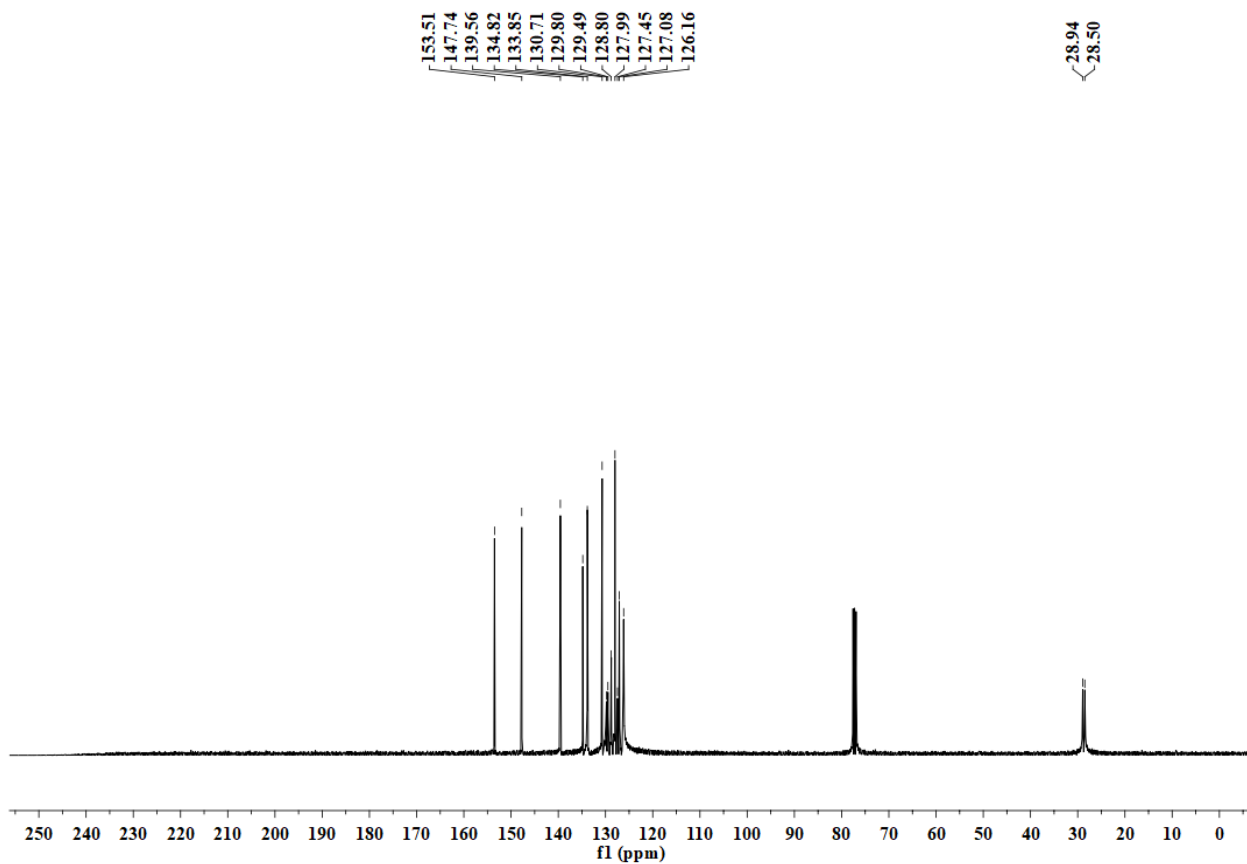

Figure S160. <sup>13</sup>C NMR spectrum of **7ak** taking CDCl<sub>3</sub> as solvent.

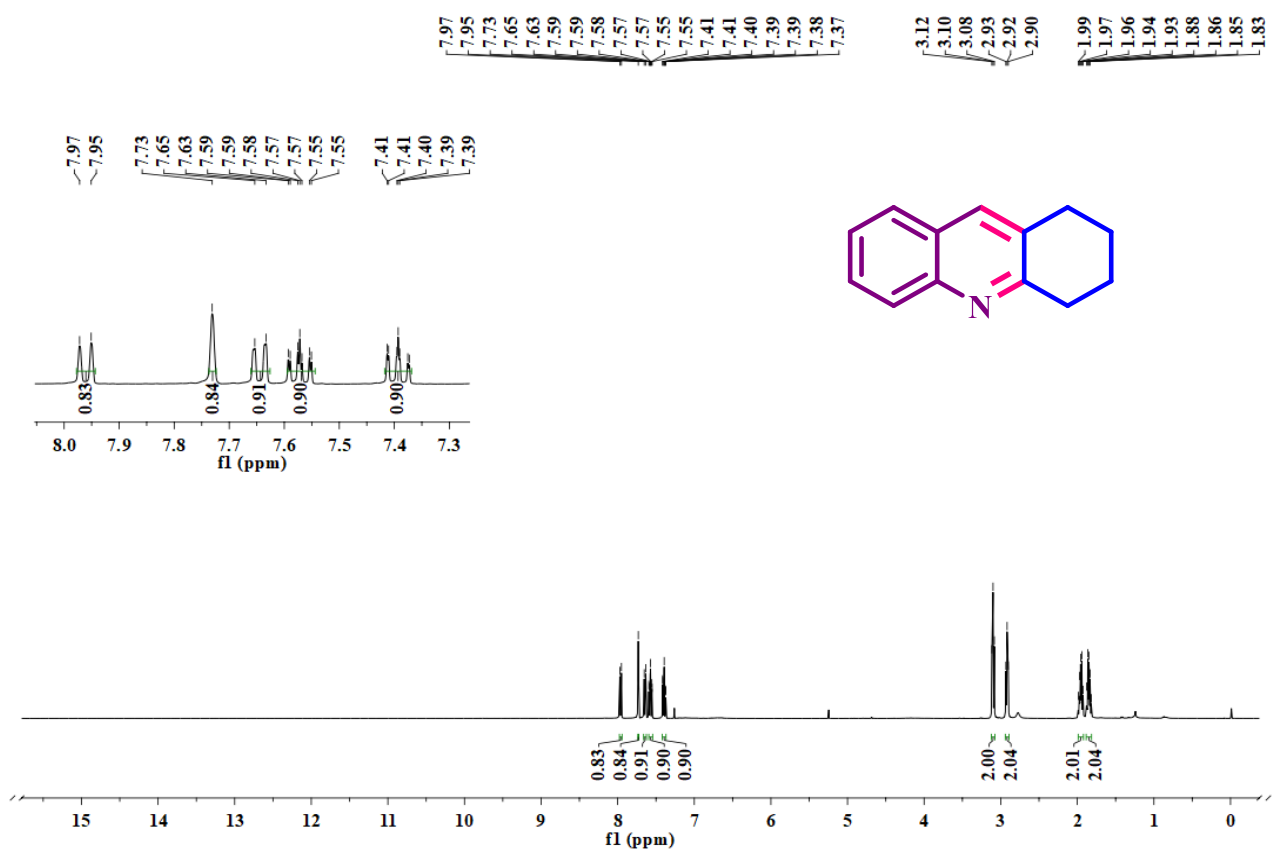

Figure S161. <sup>1</sup>H NMR spectrum of **7al** taking CDCl<sub>3</sub> as solvent.

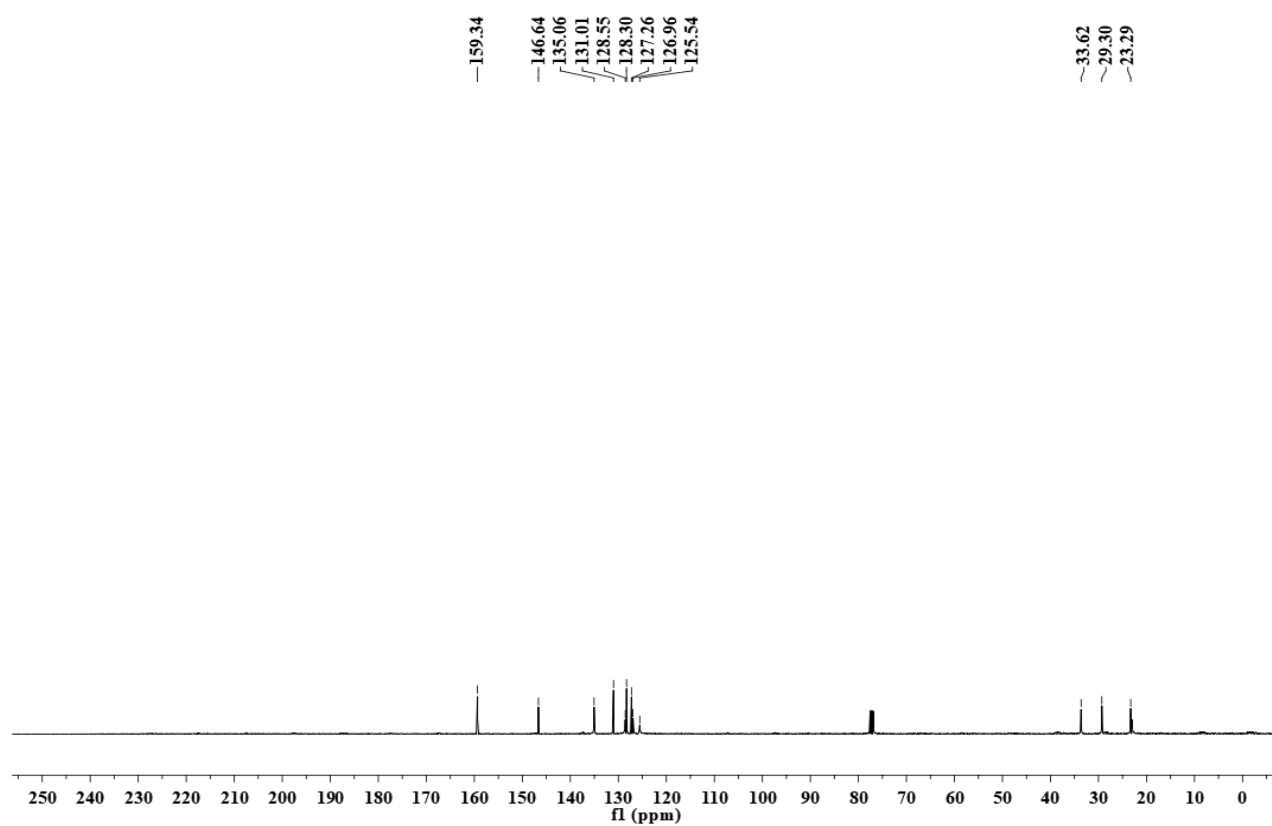

Figure S162. <sup>13</sup>C NMR spectrum of **7al** taking CDCl<sub>3</sub> as solvent.

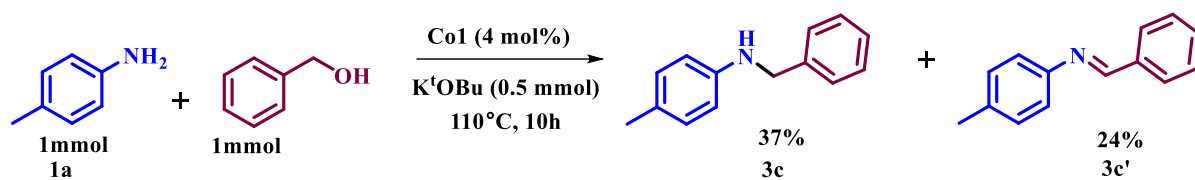

**Scheme S1.** Control experiment scheme 3B.

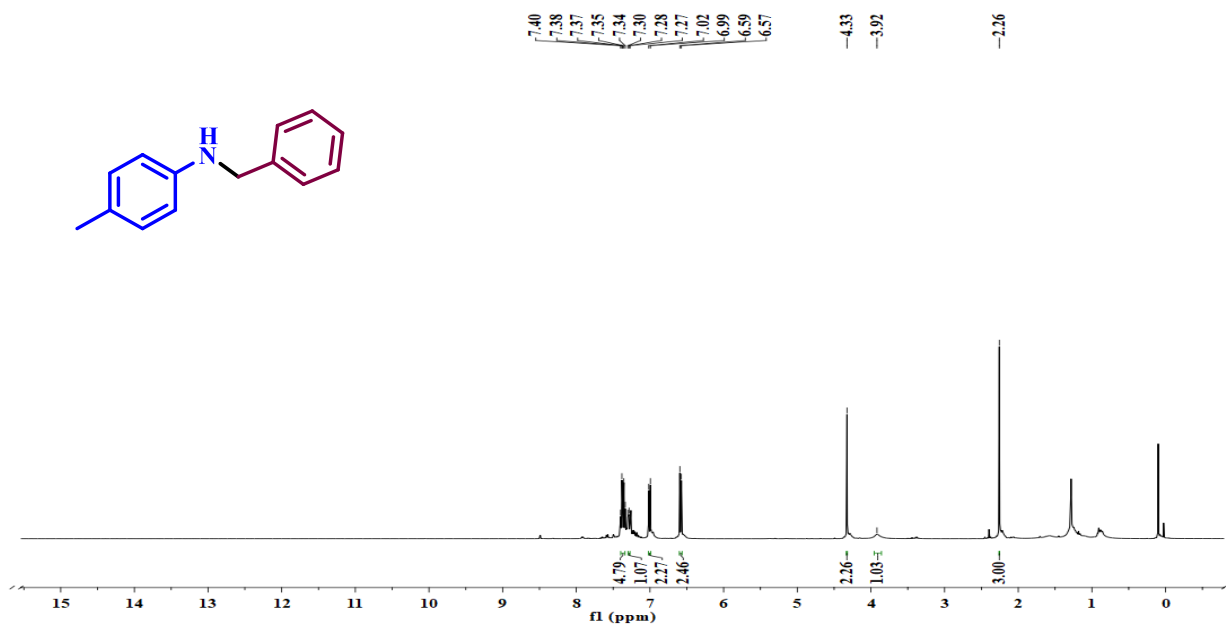

**Figure S163.**  $^1\text{H}$  NMR spectrum of 3c taking  $\text{CDCl}_3$  as solvent.

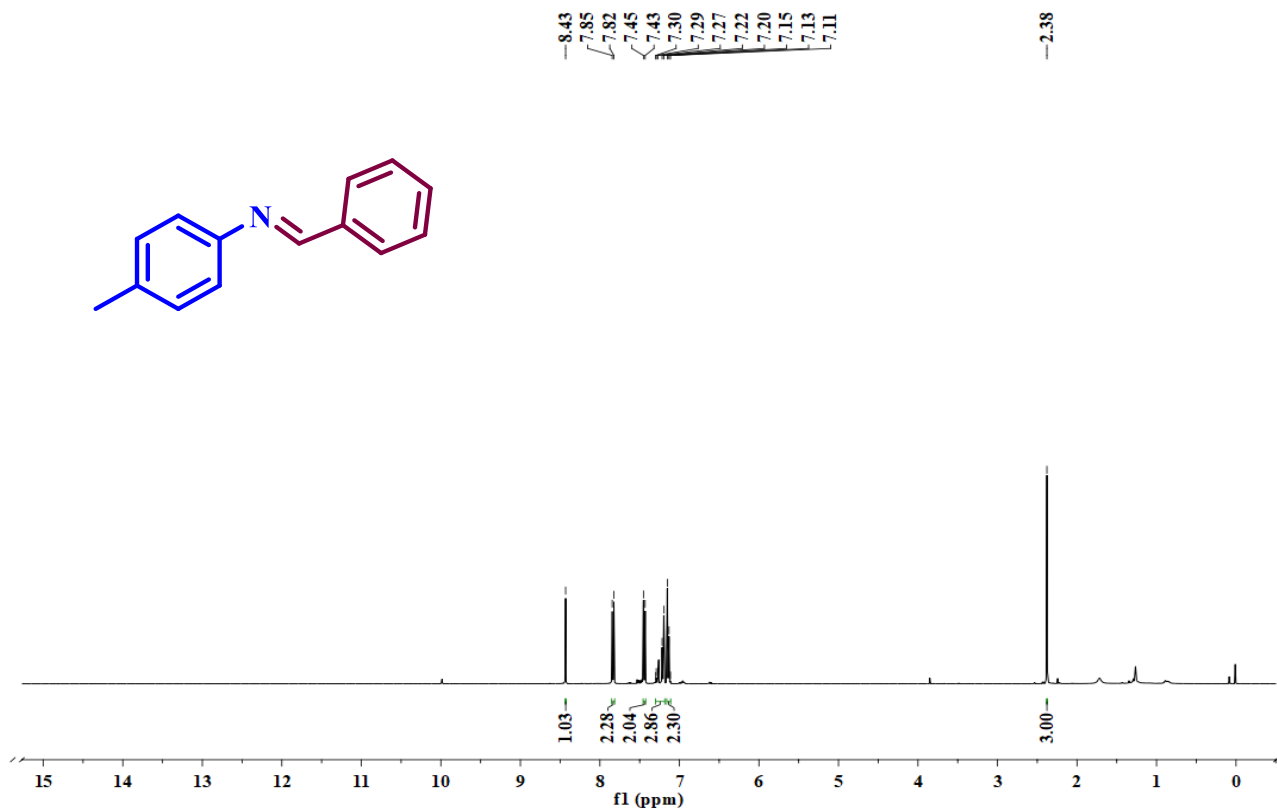

**Figure S164.**  $^1\text{H}$  NMR spectrum of 3c' taking  $\text{CDCl}_3$  as solvent.

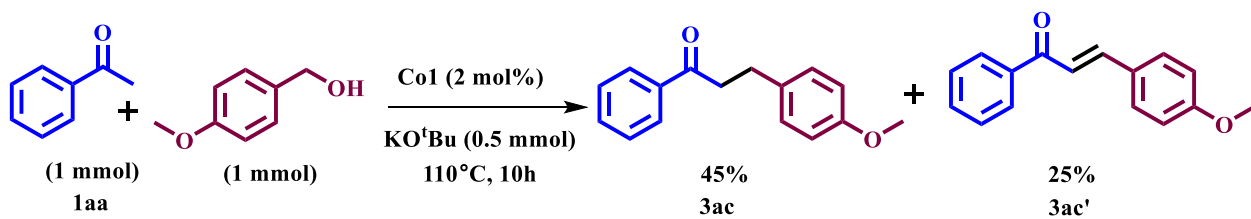

**Scheme S2.** Control experiment scheme 5B.

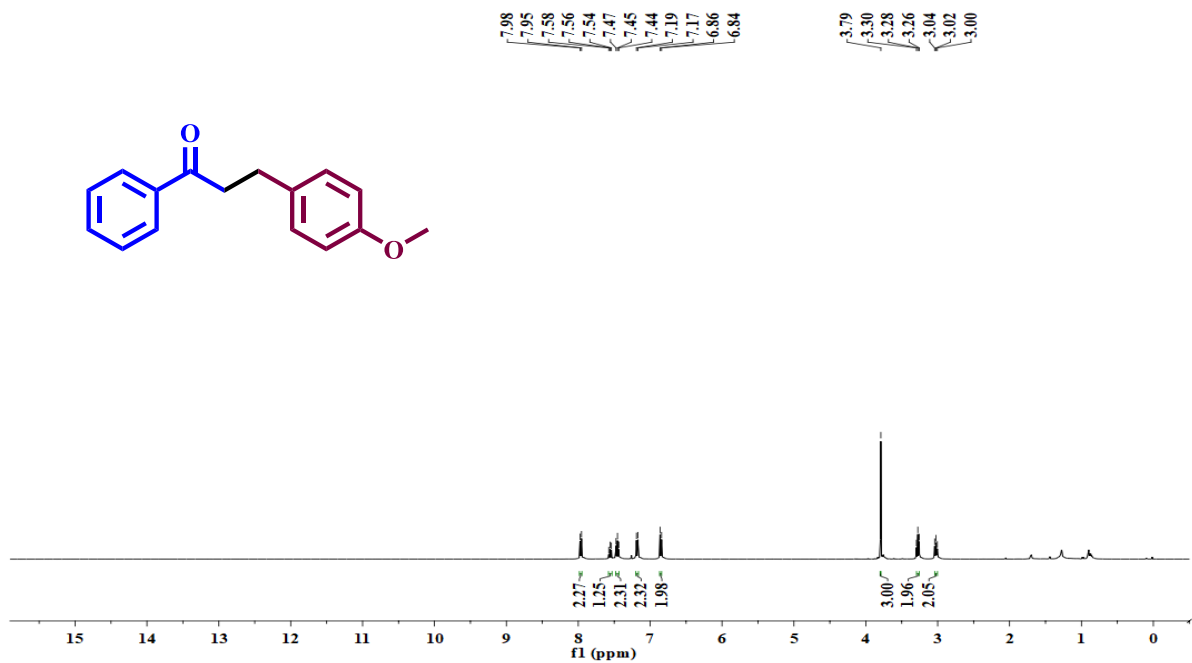

**Figure S165.** <sup>1</sup>H NMR spectrum of **3ac** taking CDCl<sub>3</sub> as solvent.

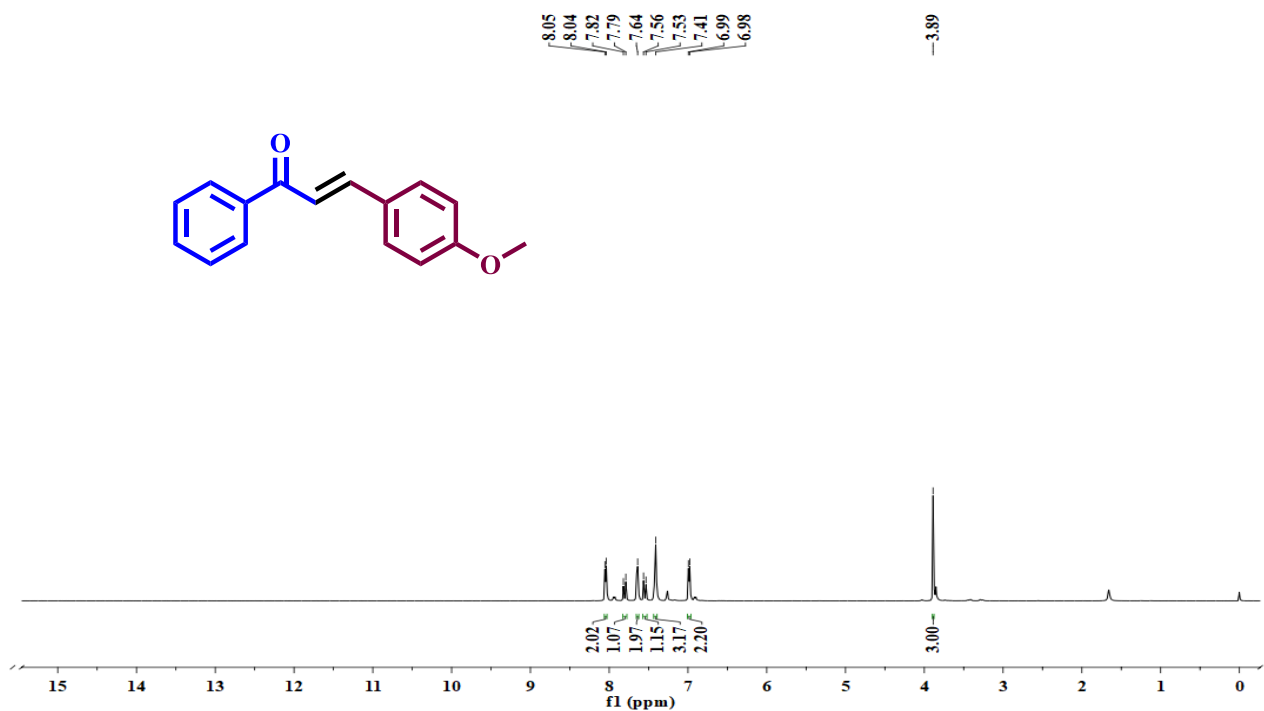

**Figure S166.** <sup>1</sup>H NMR spectrum of **3ac'** taking CDCl<sub>3</sub> as solvent.

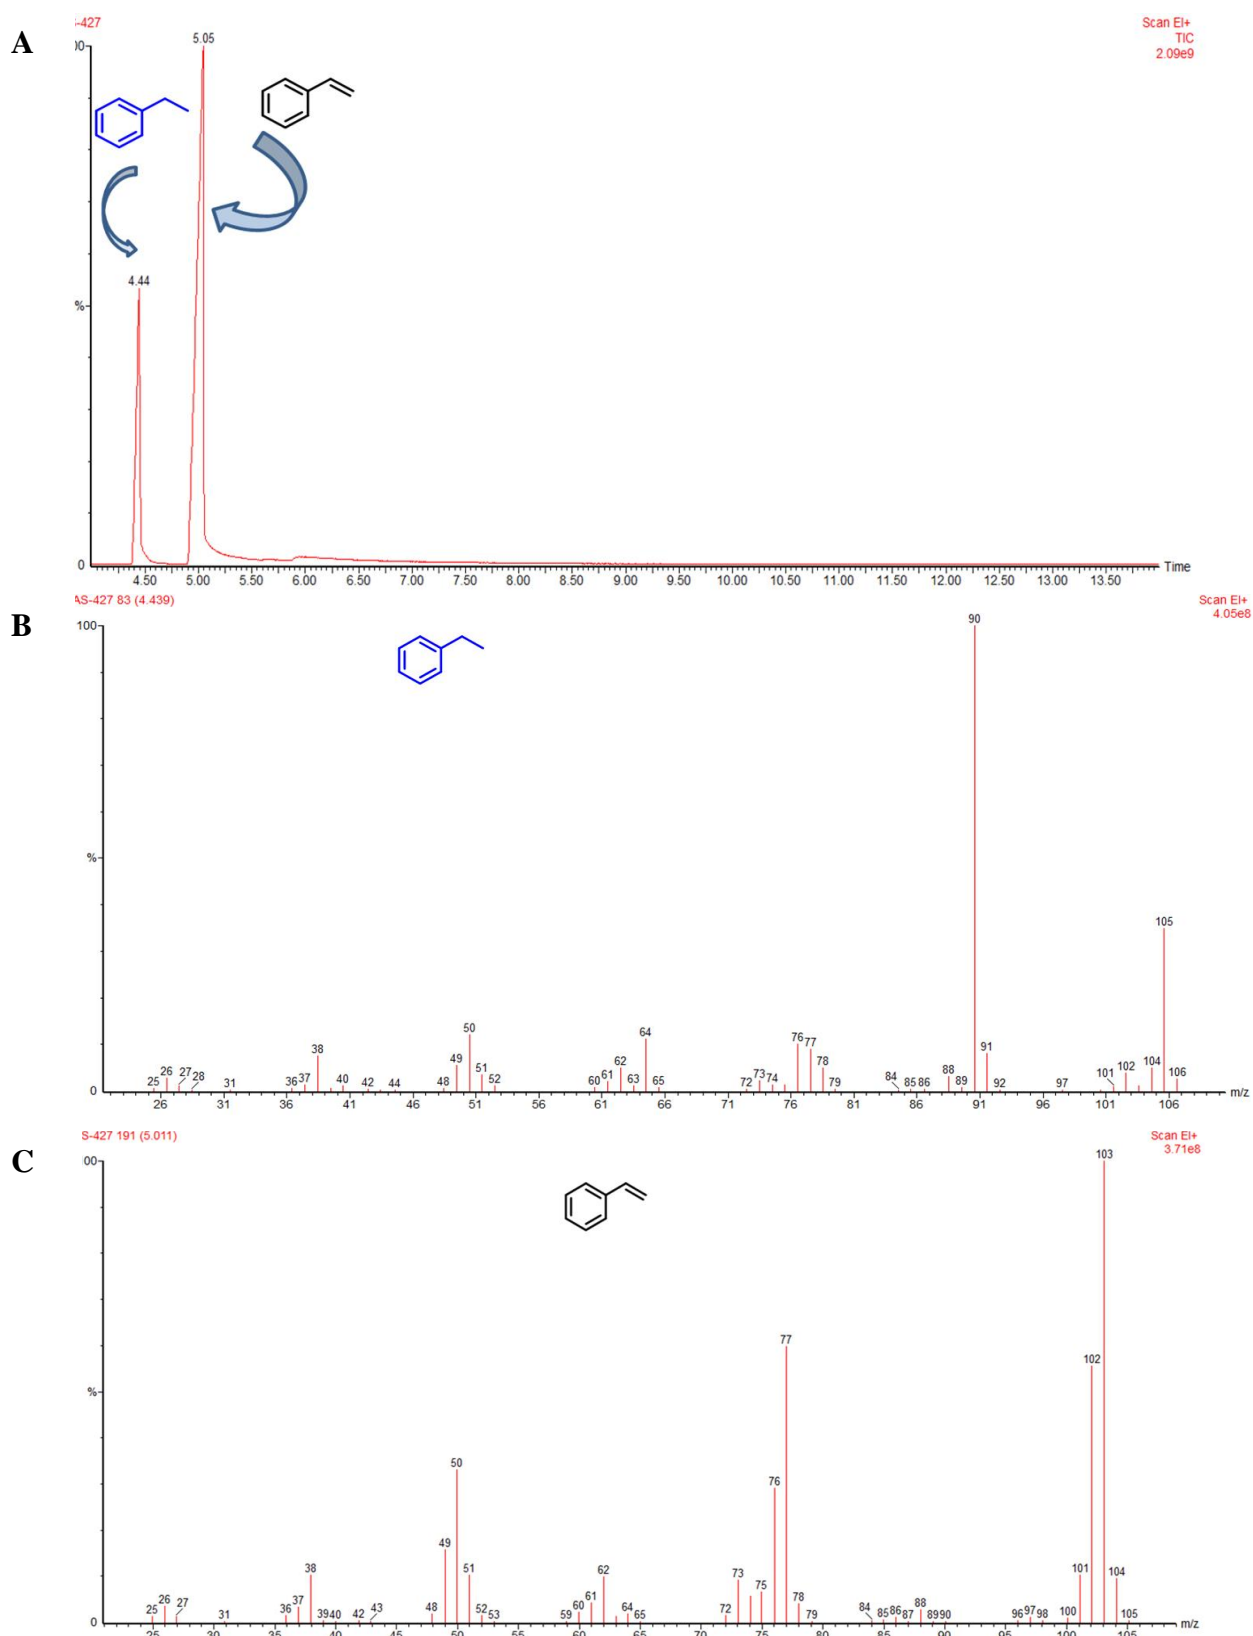

**Figure S167. (A)** GC-MS spectrum of the reaction mixture of scheme 3D. **(B)** GC-MS mass distribution for ethylbenzene **(C)** GC-MS mass distribution for styrene.



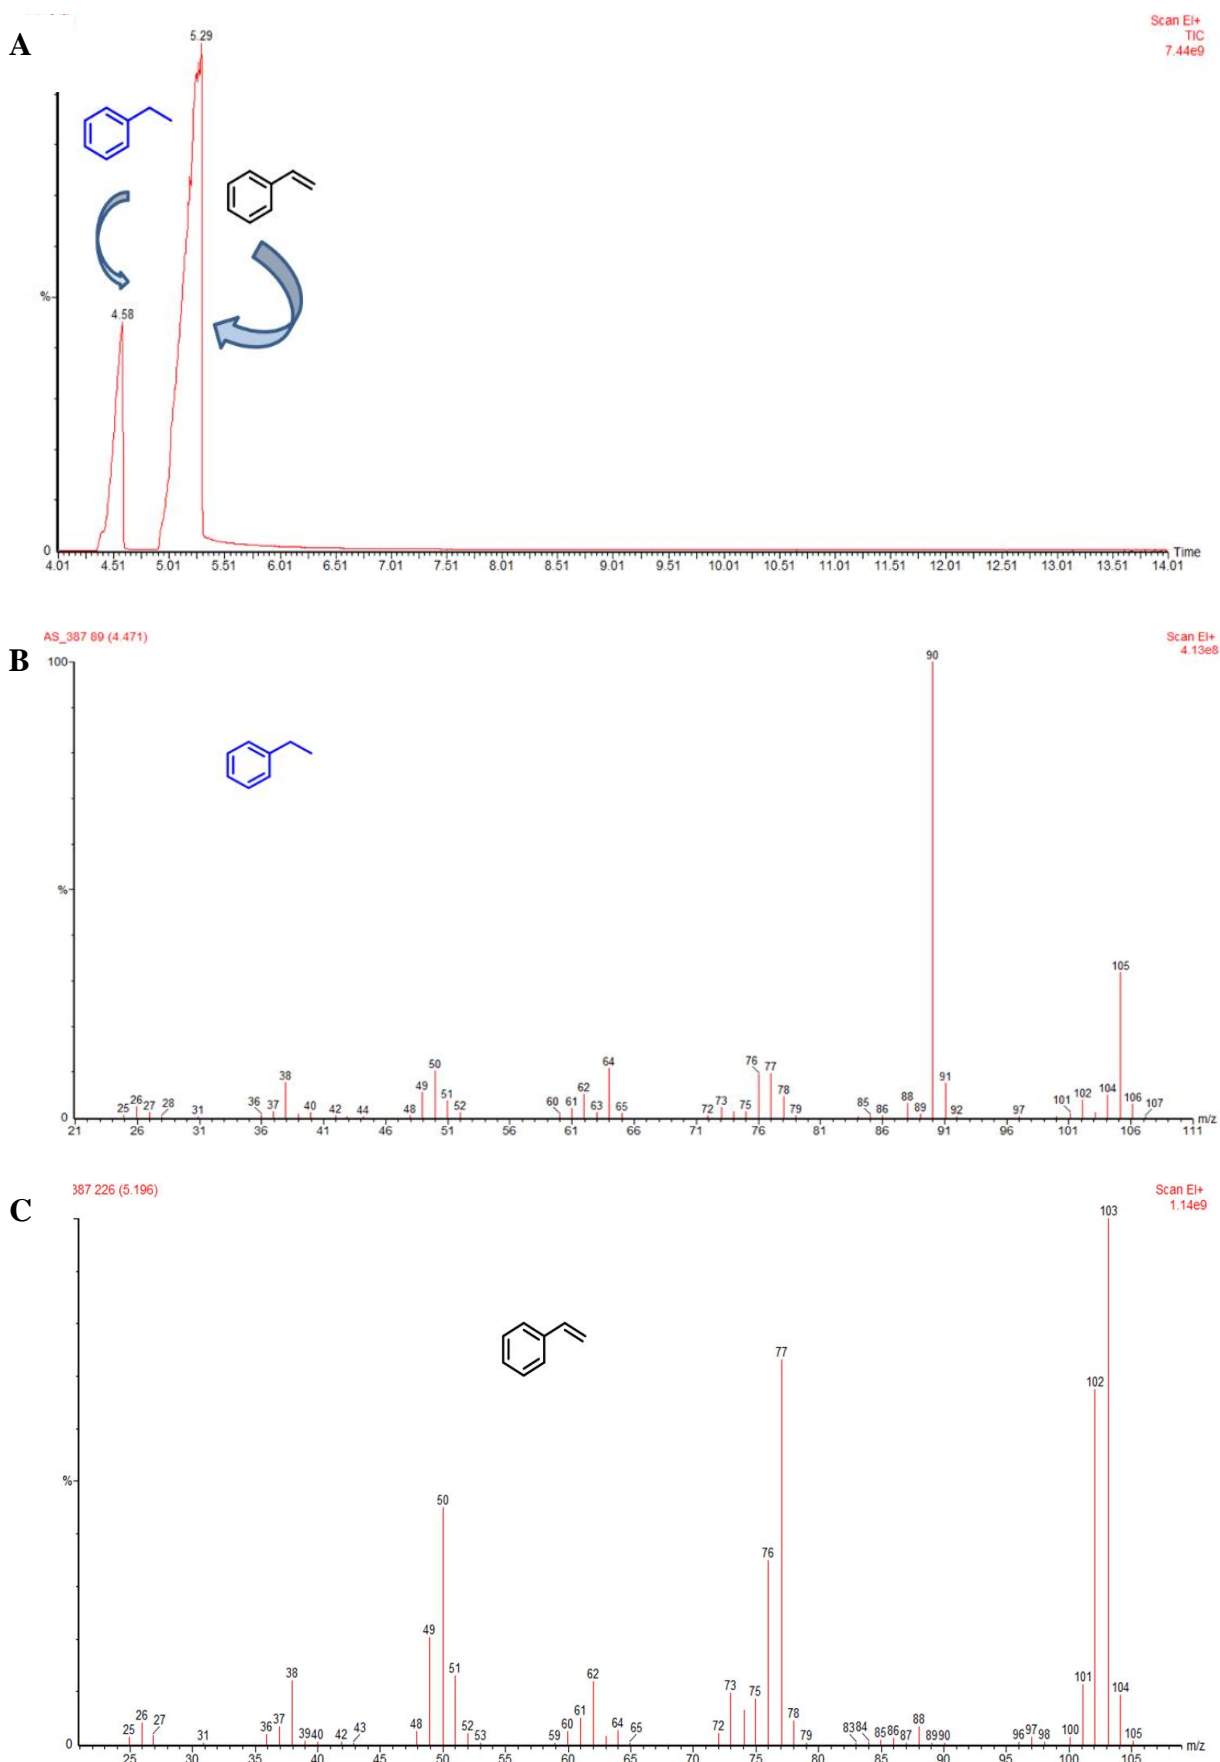

**Figure S168.** (A) GC-MS spectrum of the reaction mixture of scheme 5D. (B) GC-MS mass distribution for ethylbenzene (C) GC-MS mass distribution for styrene.

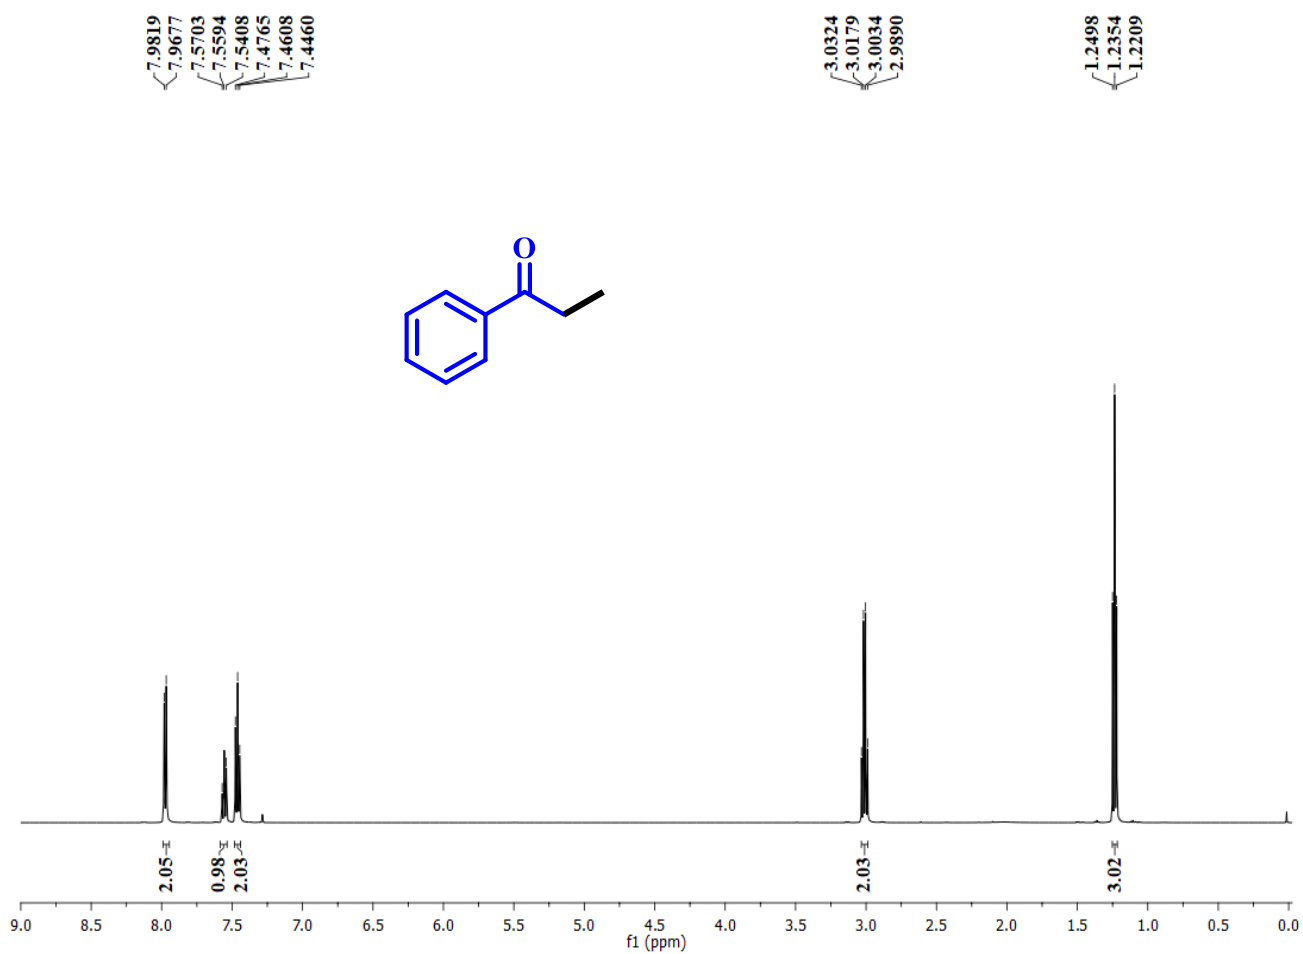

Figure S169. <sup>1</sup>H NMR spectrum of 5ha taking CDCl<sub>3</sub> as solvent.

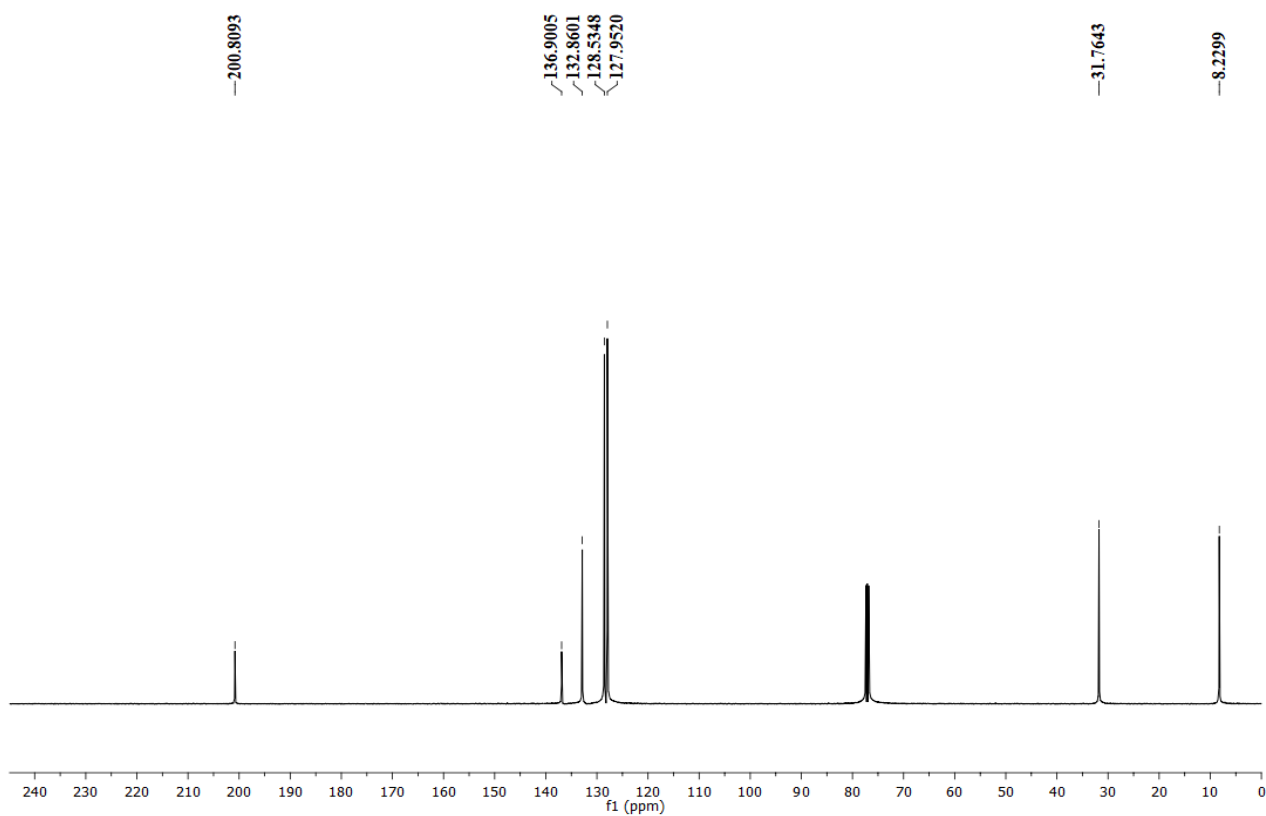

Figure S170. <sup>13</sup>C NMR spectrum of 5ha taking CDCl<sub>3</sub> as solvent.

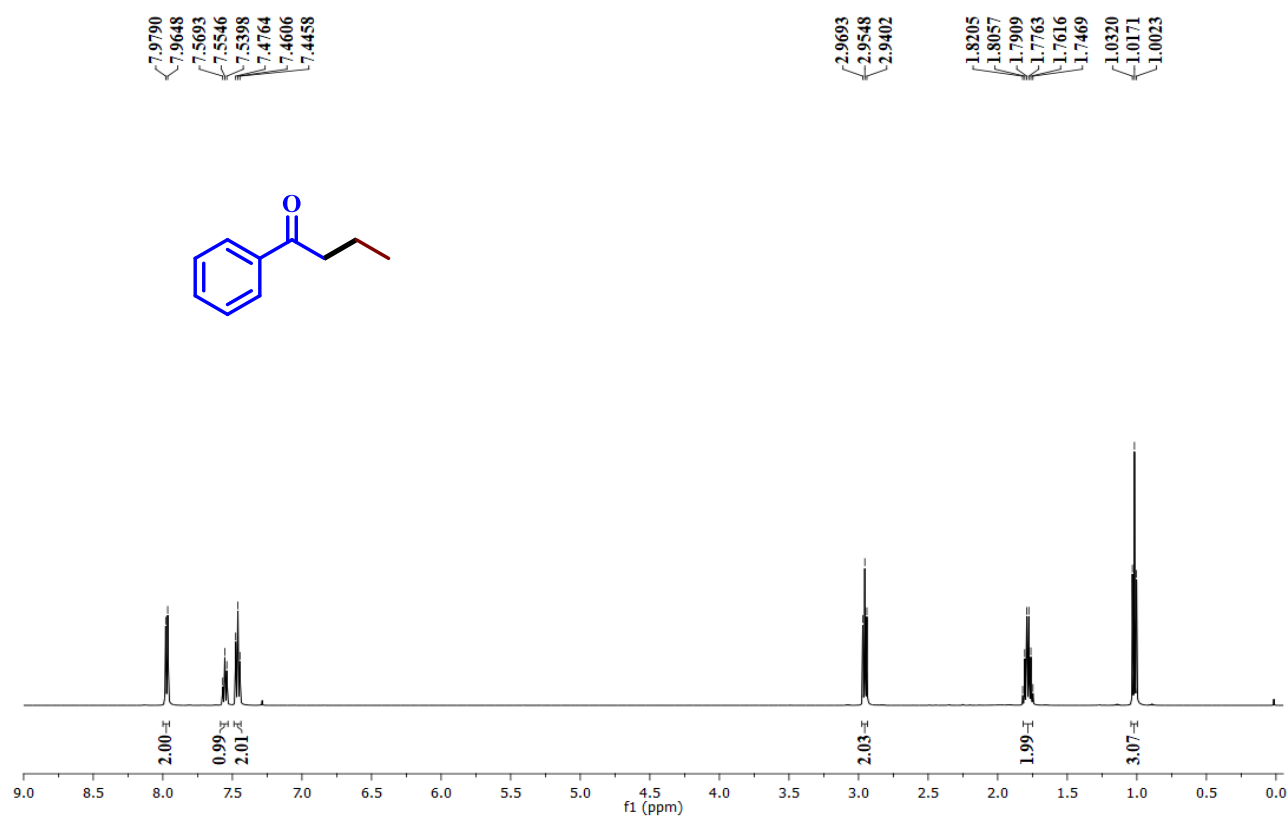

Figure S171. <sup>1</sup>H NMR spectrum of 5hb taking CDCl<sub>3</sub> as solvent.

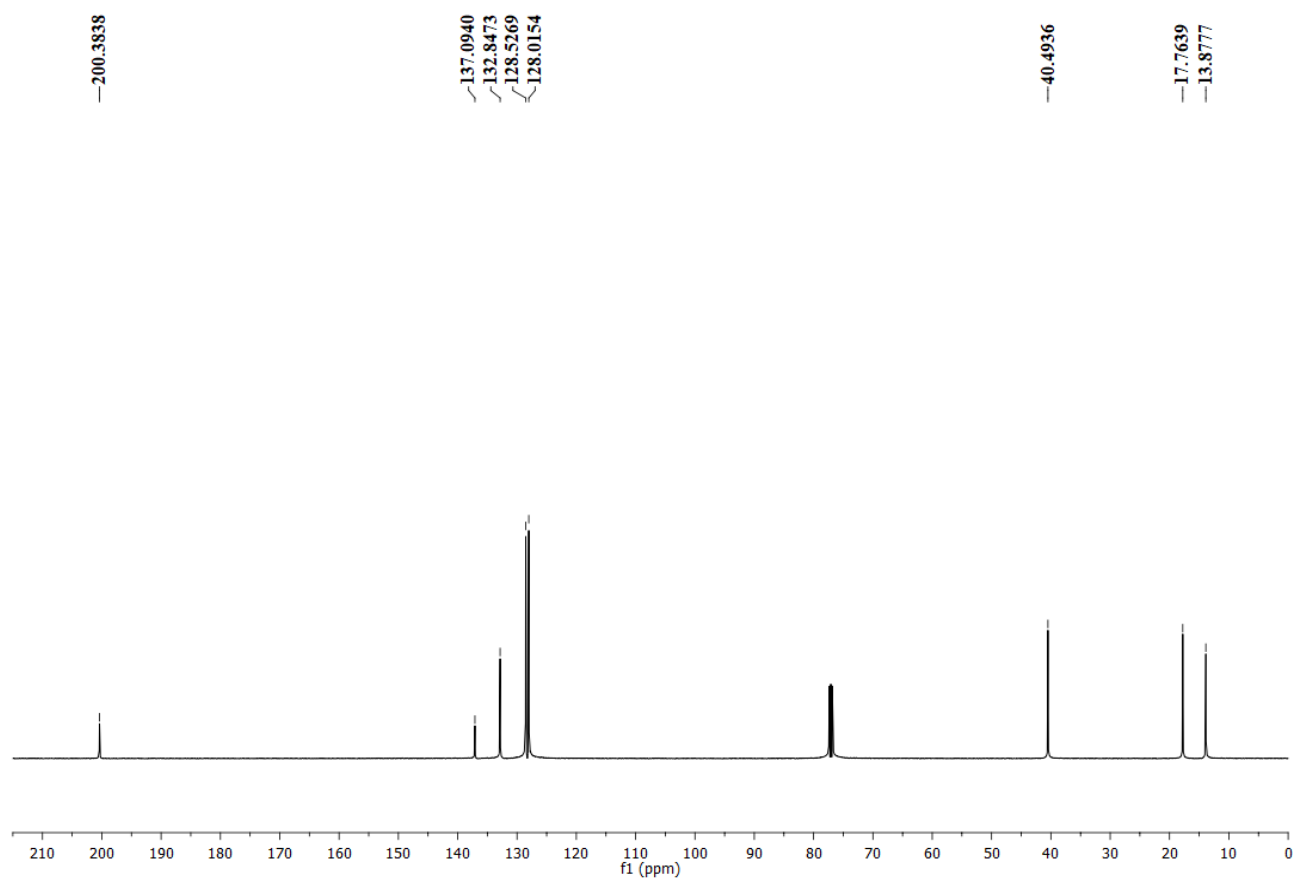

Figure S172. <sup>13</sup>C NMR spectrum of 5hb taking CDCl<sub>3</sub> as solvent.

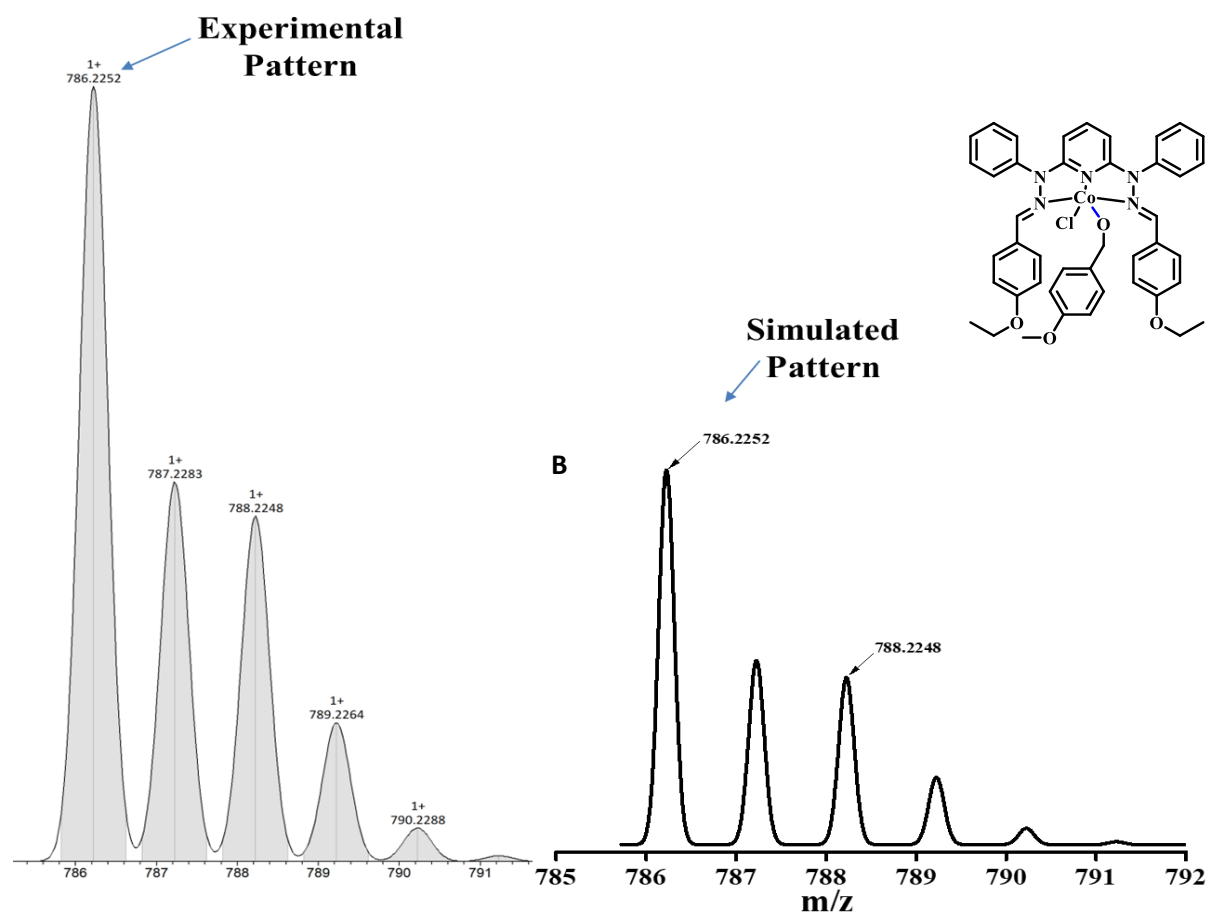

**Figure S173.** The ESI-MS spectrum of Co-alkoxide species (A) Experimental Pattern (B) Simulated Pattern.

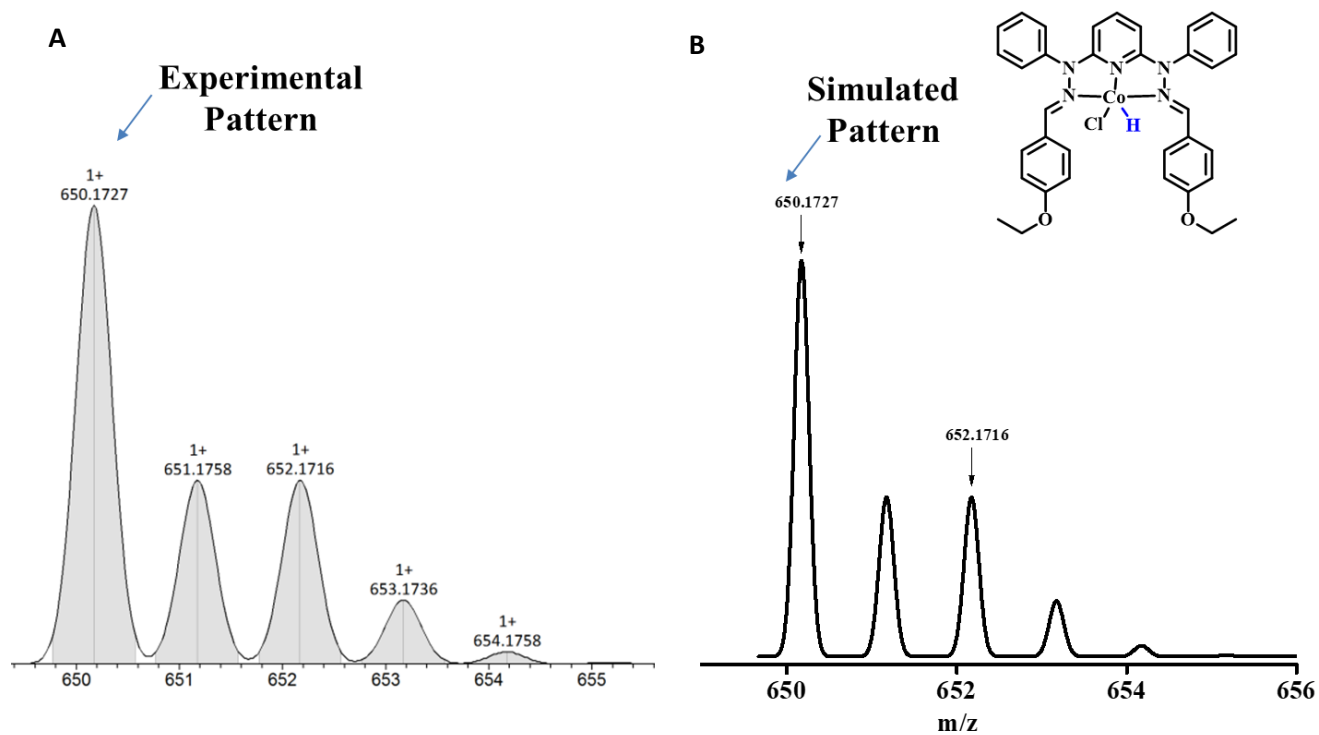

**Figure S174.** The ESI-MS spectrum of Co-H species (A) Experimental Pattern (B) Simulated Pattern.

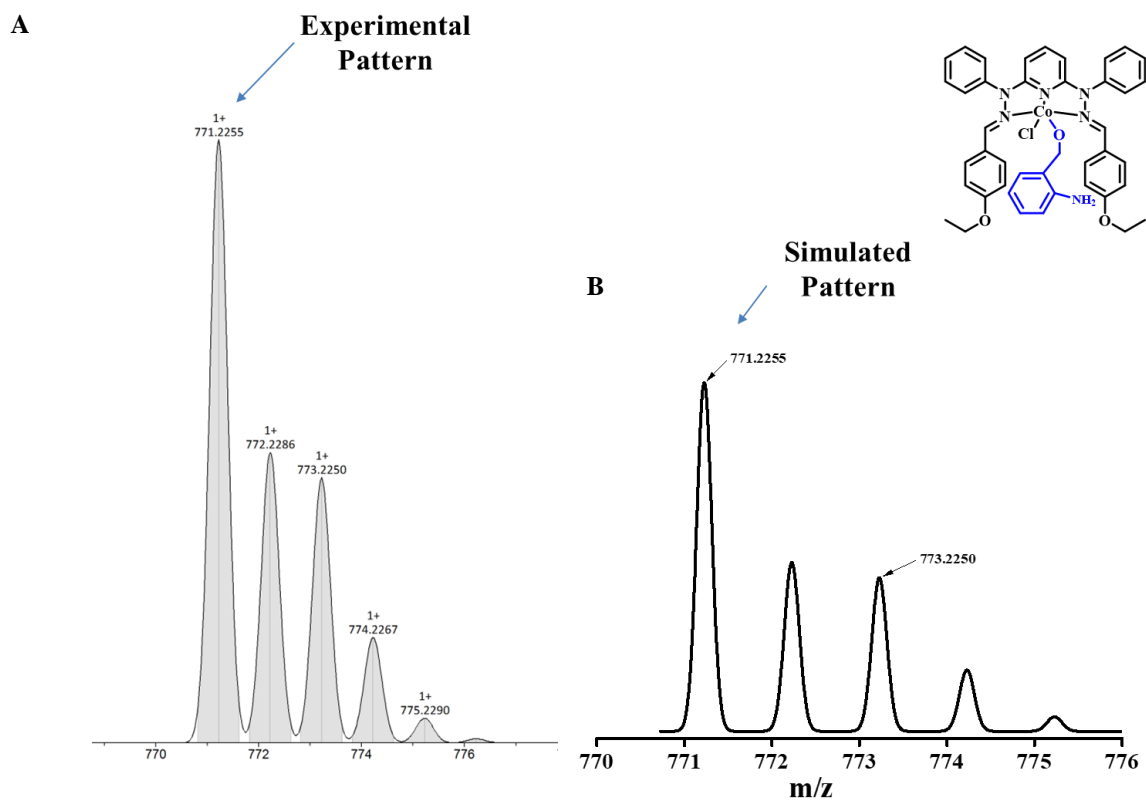

**Figure S175.** The ESI-MS spectrum of Co-alkoxide species (A) Experimental Pattern (B) Simulated Pattern.

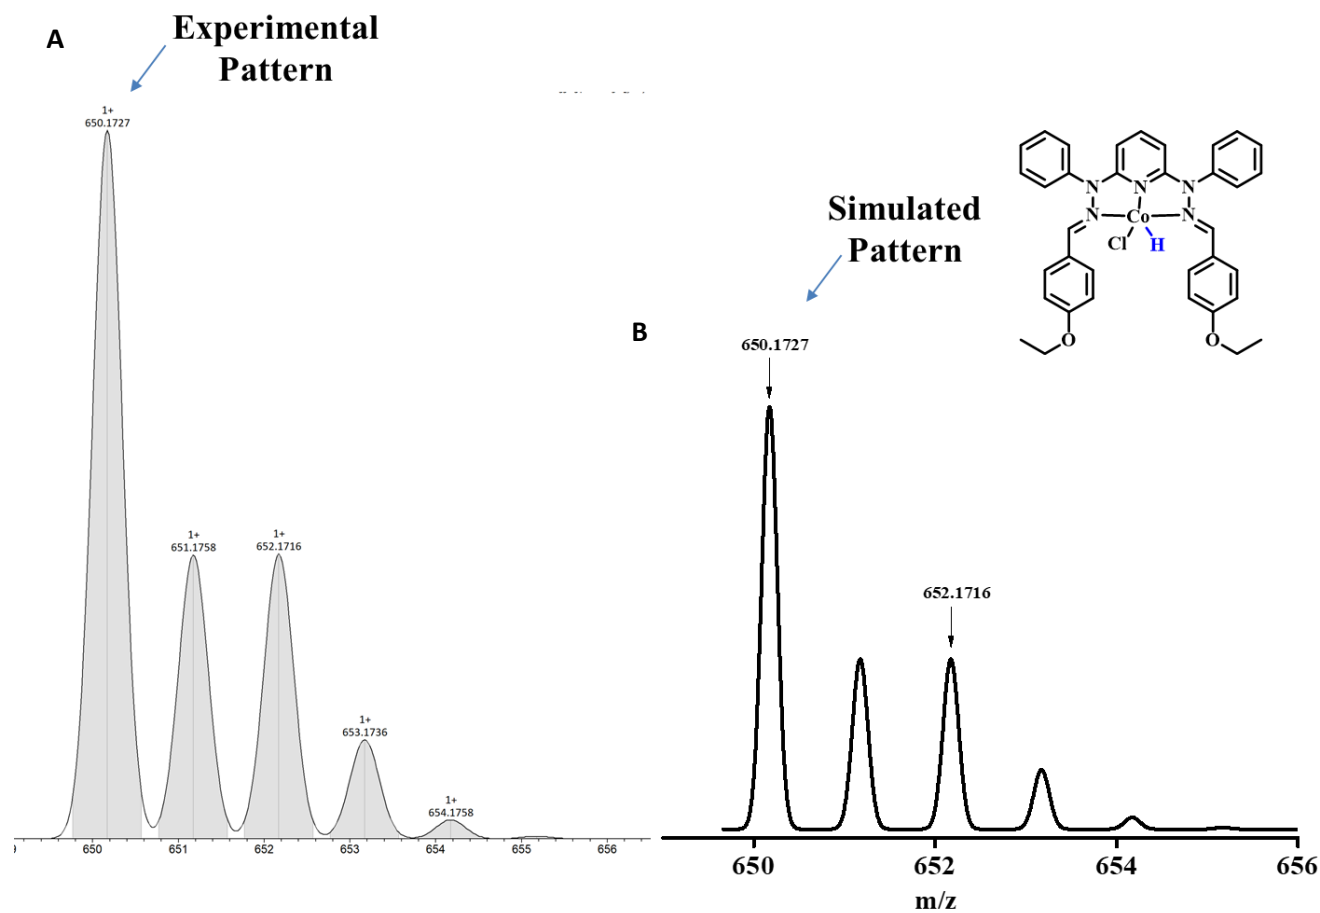

**Figure S176.** The ESI-MS spectrum of Co-H species (A) Experimental Pattern (B) Simulated Pattern.

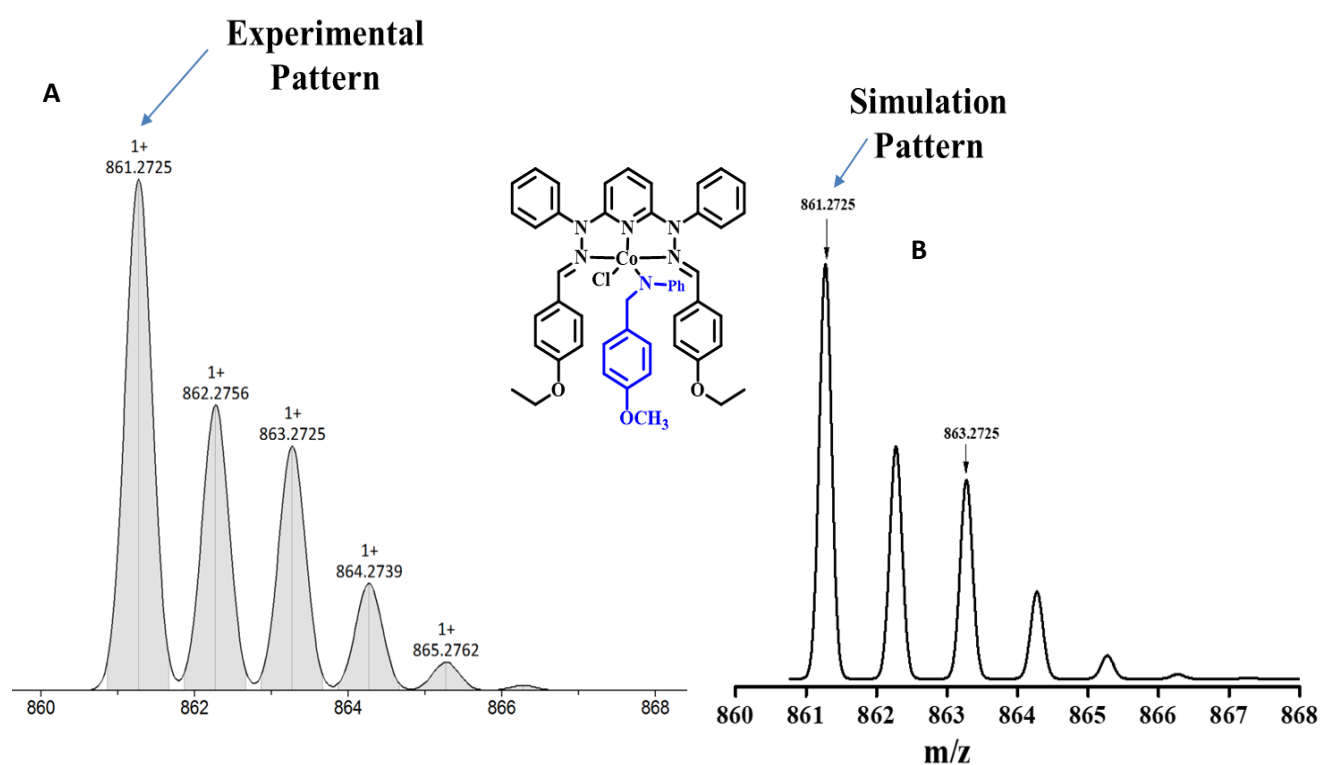

**Figure S177.** The ESI-MS spectrum of intermediate **IV** of *N*-alkylation of anilines (A) Experimental Pattern (B) Simulated Pattern.

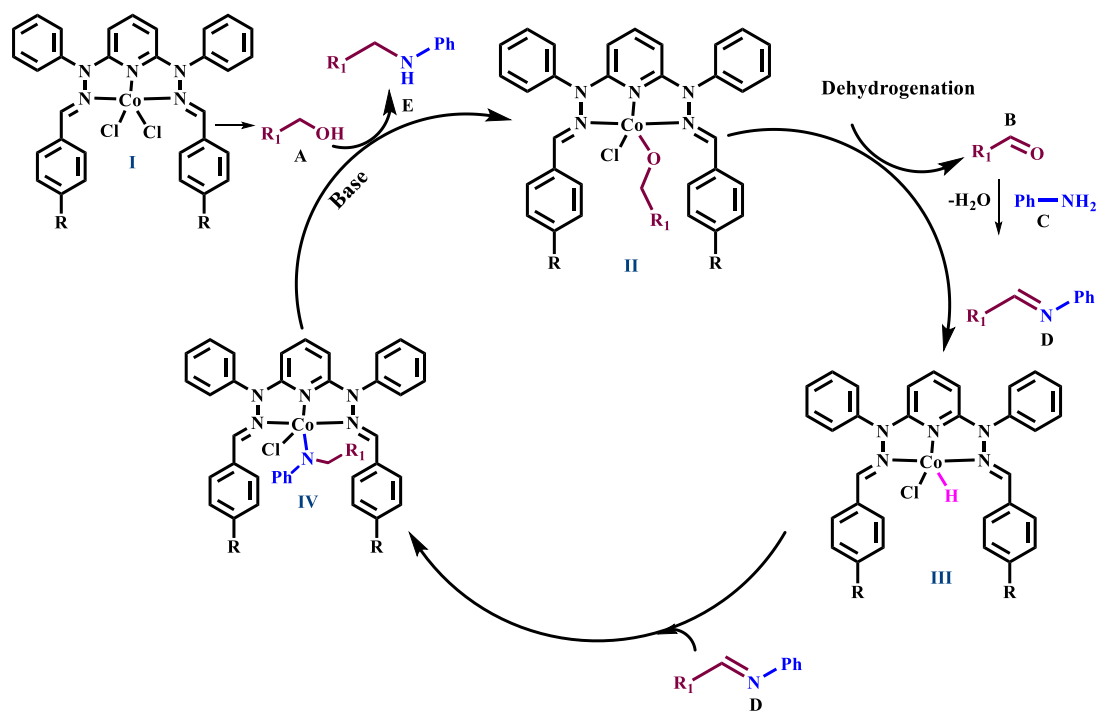

**Scheme S3.** Probable mechanism of *N*-alkylation of anilines.

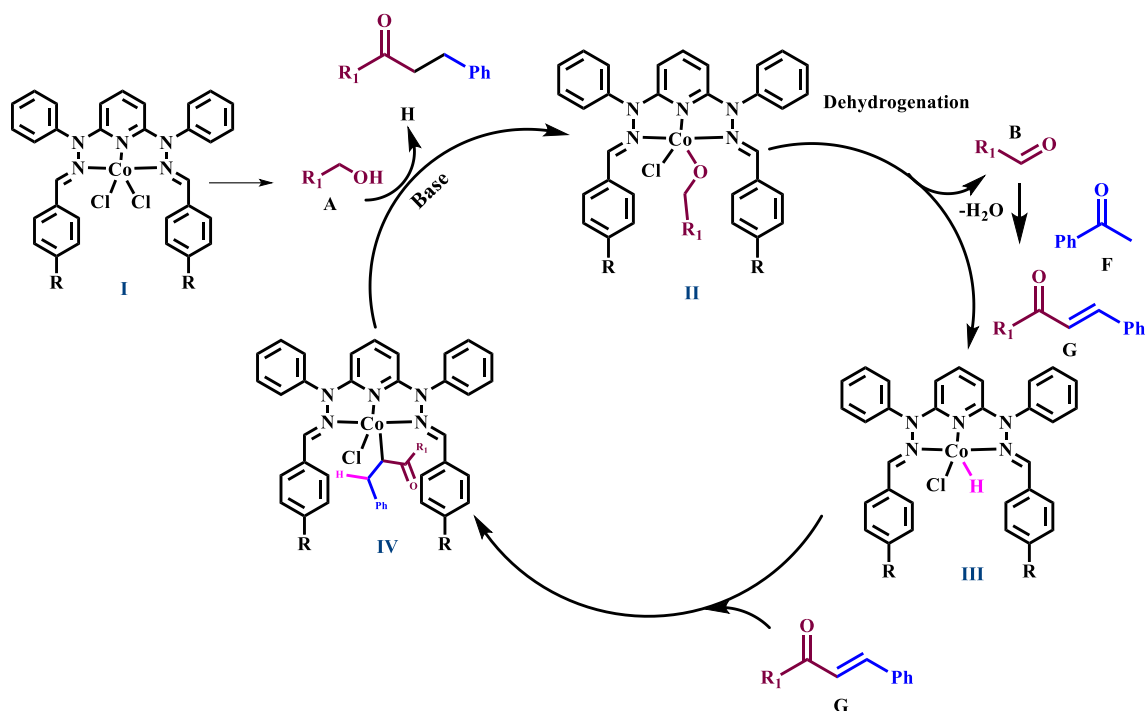

**Scheme S4.** Probable mechanism of  $\alpha$ -alkylation of ketones.

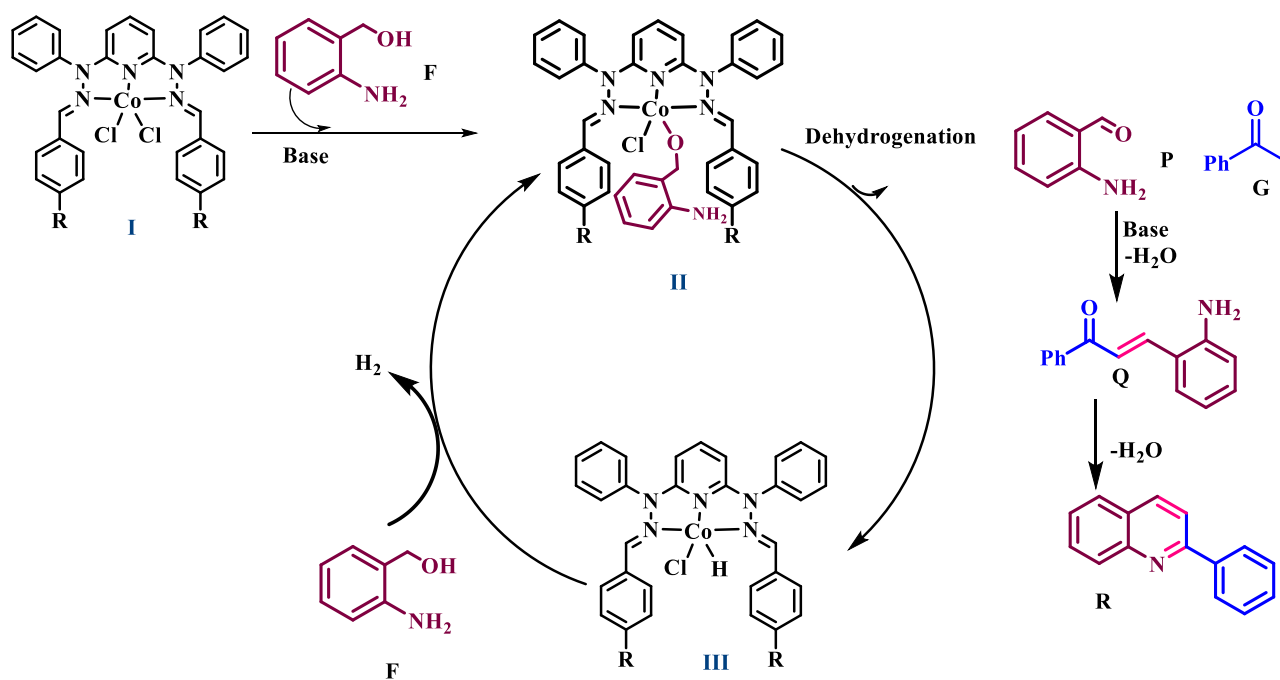

**Scheme S5.** Probable mechanism of dehydrogenative cyclization.
